# Supplementary material for: Golgi apparatus proteome deciphering in living cells enabled by aggregation-induced emission luminogen-mediated photocatalytic proximity labeling (AIE-PhoPL)
Source: Research Square preprint supplement (doi:10.21203/rs.3.rs-4010750/v1), 2024-03-22
Supplement: Supplementary file 3 [file d1122517a60247661a0b8355.xlsx]

## Sheet: Info
Supplementary Dataset 3: Dynamic GA proteome dissection in highly brain metastatic human lung cancer cells.
Sheet1: GA proteome identified by AIE-PhoPL.
Sheet 2: Whole proteome.

## Sheet: GA proteome
Majority Protein ID	Protein description	Gene name	Rep1-ratio (PC9-BrM3/PC9)	Rep2-ratio (PC9-BrM3/PC9)	Rep3-ratio (PC9-BrM3/PC9)	Log1.5-Average-ratio (PC9-BrM3/PC9)	T-test Significant	-Log10(p value) (PC9-BrM3/PC9)	Rep1-ratio (BrM3-CoCl2/Ctrl)	Rep2-ratio (BrM3-CoCl2/Ctrl)	Rep3-ratio (BrM3-CoCl2/Ctrl)	Log1.5-Average-ratio (BrM3-CoCl2/Ctrl)	T-test Significant	-Log10(p value) (BrM3-CoCl2/Ctrl)	Subcellular location
															Golgi-annotated	Golgi-associated	Mitochondrion	Cytoplasm	Nucleus	Others
P29279	CCN family member 2 (Cellular communication network factor 2) (Connective tissue growth factor) (Hypertrophic chondrocyte-specific protein 24) (Insulin-like growth factor-binding protein 8) (IBP-8) (IGF-binding protein 8) (IGFBP-8)	CCN2 CTGF HCS24 IGFBP8	1.40765	1.16604		0.621986		0.636029	1.05221	1.22362		0.318645		0.465054	1
P35625	Metalloproteinase inhibitor 3 (Protein MIG-5) (Tissue inhibitor of metalloproteinases 3) (TIMP-3)	TIMP3	1.16221	1.18708	1.69168	0.734648		0.835347	1.17748	0.87618	0.993065	0.038114		0.0299013	1
P04062	Lysosomal acid glucosylceramidase (Lysosomal acid GCase) (EC 3.2.1.45) (Acid beta-glucosidase) (Alglucerase) (Beta-glucocerebrosidase) (Beta-GC) (Beta-glucosylceramidase 1) (Cholesterol glucosyltransferase) (SGTase) (EC 2.4.1.-) (Cholesteryl-beta-glucosidase) (EC 3.2.1.-) (D-glucosyl-N-acylsphingosine glucohydrolase) (Glucosylceramidase beta 1) (Imiglucerase) (Lysosomal cholesterol glycosyltransf…	GBA1 GBA GC GLUC	0.932456	1.26285	1.12439	0.24974		0.397256	0.550567	0.633235	0.612013	-1.26559	+	2.17891	1
O75955	Flotillin-1	FLOT1	0.819406	0.754566	0.717225	-0.664762	+	1.70134	0.611826	0.765792	0.93913	-0.637411		0.802604	1
Q9Y5X9	Endothelial lipase (EC 3.1.1.3) (Endothelial cell-derived lipase) (EDL) (EL) (Phospholipase A1) (EC 3.1.1.32)	LIPG UNQ387/PRO719	1.26787	1.34034	1.76232	0.928004		1.15803	1.23536	0.829813	1.10357	0.134965		0.11832	1
P35052	Glypican-1 [Cleaved into: Secreted glypican-1]	GPC1	1.26955	1.19879	1.15752	0.467309	+	1.70441	1.05119	0.818895	1.13989	0.00819143		0.0199091	1
Q92542	Nicastrin	NCSTN KIAA0253 UNQ1874/PRO4317	1.21381	1.26933	1.2138	0.515189	+	2.29532	0.916575	0.872219	1.08373	-0.107093		0.265678	1
Q6IAA8	Ragulator complex protein LAMTOR1 (Late endosomal/lysosomal adaptor and MAPK and MTOR activator 1) (Lipid raft adaptor protein p18) (Protein associated with DRMs and endosomes) (p27Kip1-releasing factor from RhoA) (p27RF-Rho)	LAMTOR1 C11orf59 PDRO PP7157	1.30351	1.59363	1.4647	0.923088	+	1.62353	0.497889	0.744794	0.799233	-0.948845		0.955818	1
Q7LGC8	Carbohydrate sulfotransferase 3 (EC 2.8.2.17) (EC 2.8.2.21) (Chondroitin 6-O-sulfotransferase 1) (C6ST-1) (Chondroitin 6-sulfotransferase) (C6ST) (Galactose/N-acetylglucosamine/N-acetylglucosamine 6-O-sulfotransferase 0) (GST-0)	CHST3	1.20211		1.36126	0.612073		0.802906	0.883661		0.938895	-0.229137		0.699255	1
Q06481	Amyloid beta precursor like protein 2 (APPH) (Amyloid beta (A4) precursor-like protein 2) (Amyloid protein homolog) (Amyloid-like protein 2) (APLP-2) (CDEI box-binding protein) (CDEBP) (Sperm membrane protein YWK-II)	APLP2 APPL2	1.01399	1.35855	1.16821	0.408726		0.696352	0.855364	0.83656	0.928196	-0.333918	+	1.30356	1
P07093	Glia-derived nexin (GDN) (Peptidase inhibitor 7) (PI-7) (Protease nexin 1) (PN-1) (Protease nexin I) (Serpin E2)	SERPINE2 PI7 PN1	1.03528	1.29985	1.9352	0.8708		0.651621	1.859	1.41583	1.78554	1.28944	+	1.58484	1
P50897	Palmitoyl-protein thioesterase 1 (PPT-1) (EC 3.1.2.22) (Palmitoyl-protein hydrolase 1)	PPT1 CLN1 PPT	0.953453	0.98714	1.20613	0.117765		0.206032	0.729077	1.15901	0.860203	-0.21613		0.288061	1
O00468	Agrin [Cleaved into: Agrin N-terminal 110 kDa subunit; Agrin C-terminal 110 kDa subunit; Agrin C-terminal 90 kDa fragment (C90); Agrin C-terminal 22 kDa fragment (C22)]	AGRN AGRIN	1.38373	1.72093	2.11226	1.36459	+	1.32076	0.911393	0.802258	0.943821	-0.299007		0.888391	1
Q9P2B2	Prostaglandin F2 receptor negative regulator (CD9 partner 1) (CD9P-1) (Glu-Trp-Ile EWI motif-containing protein F) (EWI-F) (Prostaglandin F2-alpha receptor regulatory protein) (Prostaglandin F2-alpha receptor-associated protein) (CD antigen CD315)	PTGFRN CD9P1 EWIF FPRP KIAA1436	1.19872	1.26078	1.22141	0.504473	+	2.28763	1.14634	1.08129	1.42429	0.484977		0.81749	1
Q93050	V-type proton ATPase 116 kDa subunit a 1 (V-ATPase 116 kDa subunit a 1) (Clathrin-coated vesicle/synaptic vesicle proton pump 116 kDa subunit) (Vacuolar adenosine triphosphatase subunit Ac116) (Vacuolar proton pump subunit 1) (Vacuolar proton translocating ATPase 116 kDa subunit a isoform 1)	ATP6V0A1 ATP6N1 ATP6N1A VPP1	1.07047	1.35786	0.795048	0.177122		0.105158	0.828949	0.493262	1.07666	-0.5515		0.44922	1
P12830	Cadherin-1 (CAM 120/80) (Epithelial cadherin) (E-cadherin) (Uvomorulin) (CD antigen CD324) [Cleaved into: E-Cad/CTF1; E-Cad/CTF2; E-Cad/CTF3]	CDH1 CDHE UVO	1.40263	1.3439	1.43223	0.817343	+	2.49662	1.20844	1.39774	1.29757	0.649439	+	1.60476	1
P29317	Ephrin type-A receptor 2 (EC 2.7.10.1) (Epithelial cell kinase) (Tyrosine-protein kinase receptor ECK)	EPHA2 ECK	1.86018	1.60744	1.79786	1.38744	+	2.21233	1.11862	1.17356	1.7205	0.717313		0.734327	1
P04439	HLA class I histocompatibility antigen, A alpha chain (Human leukocyte antigen A) (HLA-A)	HLA-A HLAA	1.26626	1.22805		0.544713	+	1.35547	0.86657	1.04645		-0.109656		0.157723	1
Q96GS4	BLOC-1-related complex subunit 6 (Lysosome-dispersing protein) (Lyspersin)	BORCS6 C17orf59	1.18339	1.14509	1.03913	0.285077		1.00088	0.587586	0.740848	0.75038	-0.904676	+	1.37128	1
P39060	Collagen alpha-1(XVIII) chain [Cleaved into: Endostatin; Non-collagenous domain 1 (NC1)]	COL18A1	2.10216	2.50447	3.16296	2.34695	+	1.80796	0.910634	0.639259	0.886042	-0.513685		0.717431	1
Q14108	Lysosome membrane protein 2 (85 kDa lysosomal membrane sialoglycoprotein) (LGP85) (CD36 antigen-like 2) (Lysosome membrane protein II) (LIMP II) (Scavenger receptor class B member 2) (CD antigen CD36)	SCARB2 CD36L2 LIMP2 LIMPII	1.41606		0.670631	0.104654		0.0195099	0.675826		1.16953	-0.198473		0.129559	1
P00749	Urokinase-type plasminogen activator (U-plasminogen activator) (uPA) (EC 3.4.21.73) [Cleaved into: Urokinase-type plasminogen activator long chain A; Urokinase-type plasminogen activator short chain A; Urokinase-type plasminogen activator chain B]	PLAU	0.648631	0.936195	1.14853	-0.229571		0.262011	1.17314	0.728355	1.15019	0.0421356		0.0115539	1
Q03135	Caveolin-1	CAV1 CAV	1.09928	1.09042	0.633768	-0.149577		0.177148	1.12944	1.2464	1.63167	0.714142		0.89333	1
P16278	Beta-galactosidase (EC 3.2.1.23) (Acid beta-galactosidase) (Lactase) (Elastin receptor 1)	GLB1 ELNR1	1.20536	1.07965	1.09101	0.291233		1.09901	0.471243	0.717521	0.756917	-1.06791		1.028	1
Q9UHL4	Dipeptidyl peptidase 2 (EC 3.4.14.2) (Dipeptidyl aminopeptidase II) (Dipeptidyl peptidase 7) (Dipeptidyl peptidase II) (DPP II) (Quiescent cell proline dipeptidase)	DPP7 DPP2 QPP	1.1379	1.10463	0.984841	0.180174		0.606127	0.492878	0.564802	0.779407	-1.20955		1.19134	1
P51636	Caveolin-2	CAV2	1.38627	0.974421		0.408926		0.259321	1.16637	1.35344		0.569803		0.697846	1
Q9Y2I7	1-phosphatidylinositol 3-phosphate 5-kinase (Phosphatidylinositol 3-phosphate 5-kinase) (EC 2.7.1.150) (FYVE finger-containing phosphoinositide kinase) (PIKfyve) (Phosphatidylinositol 3-phosphate 5-kinase type III) (PIPkin-III) (Type III PIP kinase) (Serine-protein kinase PIKFYVE) (EC 2.7.11.1)	PIKFYVE KIAA0981 PIP5K3	0.938917		0.73574	-0.437865		0.430578	0.57448		0.820734	-0.888114		0.549696	1
Q99985	Semaphorin-3C (Semaphorin-E) (Sema E)	SEMA3C SEMAE	0.564061	0.789366	0.951381	-0.650155		0.694457	0.702282	0.552766	0.685524	-1.0744	+	1.54557	1
P46531	Neurogenic locus notch homolog protein 1 (Notch 1) (hN1) (Translocation-associated notch protein TAN-1) [Cleaved into: Notch 1 extracellular truncation (NEXT); Notch 1 intracellular domain (NICD)]	NOTCH1 TAN1	0.783332	0.716914	1.35743	-0.119868		0.158074	1.14758	0.893773	1.14743	0.150511		0.235499	1
Q12959	Disks large homolog 1 (Synapse-associated protein 97) (SAP-97) (SAP97) (hDlg)	DLG1	1.12741	1.18317	1.46796	0.569041		0.95862	0.948951	1.10718	1.06749	0.099587		0.303179	1
Q08AM6	Protein VAC14 homolog (Tax1-binding protein 2)	VAC14 TAX1BP2 TRX	1.52456	1.17447	0.834294	0.40355		0.281052	0.726274	0.557526	1.28123	-0.386324		0.330814	1
P21810	Biglycan (Bone/cartilage proteoglycan I) (PG-S1)	BGN SLRR1A	1.24443	1.38688		0.676594		0.903772	0.826643	0.801129		-0.507898	+	1.31572	1
P29323	Ephrin type-B receptor 2 (EC 2.7.10.1) (Developmentally-regulated Eph-related tyrosine kinase) (ELK-related tyrosine kinase) (EPH tyrosine kinase 3) (EPH-like kinase 5) (EK5) (hEK5) (Renal carcinoma antigen NY-REN-47) (Tyrosine-protein kinase TYRO5) (Tyrosine-protein kinase receptor EPH-3) [Cleaved into: EphB2/CTF1; EphB2/CTF2]	EPHB2 DRT EPHT3 EPTH3 ERK HEK5 TYRO5	1.44487	1.54342	1.19815	0.821865	+	1.30416	0.998844	1.39608	1.32051	0.527501		0.724916	1
P01889	HLA class I histocompatibility antigen, B alpha chain (Human leukocyte antigen B) (HLA-B)	HLA-B HLAB	1.10468			0.245538			0.843895			-0.4186			1
P00533	Epidermal growth factor receptor (EC 2.7.10.1) (Proto-oncogene c-ErbB-1) (Receptor tyrosine-protein kinase erbB-1)	EGFR ERBB ERBB1 HER1	1.28716	1.23821	1.52147	0.738223	+	1.36756	1.23812	1.02174	1.27559	0.405031		0.82749	1
P54764	Ephrin type-A receptor 4 (EC 2.7.10.1) (EPH-like kinase 8) (EK8) (hEK8) (Tyrosine-protein kinase TYRO1) (Tyrosine-protein kinase receptor SEK)	EPHA4 HEK8 SEK TYRO1	1.54218	1.55803		1.08104	+	2.12922	1.62787	1.14553		0.806301		0.485596	1
Q8IV08	5'-3' exonuclease PLD3 (EC 3.1.16.1) (Choline phosphatase 3) (HindIII K4L homolog) (Hu-K4) (Phosphatidylcholine-hydrolyzing phospholipase D3) (Phospholipase D3) (PLD 3)	PLD3	1.15733	1.08764	1.18578	0.3309	+	1.45379	0.986258	0.999562	0.773103	-0.206607		0.407265	1
Q13425	Beta-2-syntrophin (59 kDa dystrophin-associated protein A1 basic component 2) (Syntrophin-3) (SNT3) (Syntrophin-like) (SNTL)	SNTB2 D16S2531E SNT2B2 SNTL	0.87858	0.790389	1.10828	-0.190282		0.324109	1.0268	0.976707	1.07484	0.0635873		0.336272	1
P10586	Receptor-type tyrosine-protein phosphatase F (EC 3.1.3.48) (Leukocyte common antigen related) (LAR)	PTPRF LAR	0.847389	0.918774	0.858741	-0.329419	+	1.48026	0.944092	1.01299	0.974617	-0.0568015		0.433383	1
Q14118	Dystroglycan 1 (Dystroglycan) (Dystrophin-associated glycoprotein 1) [Cleaved into: Alpha-dystroglycan (Alpha-DG); Beta-dystroglycan (Beta-DG)]	DAG1	0.907565	1.17473	1.02394	0.0858219		0.135039	1.11522	1.04917	1.15781	0.251601		1.14303	1
O15533	Tapasin (TPN) (TPSN) (NGS-17) (TAP-associated protein) (TAP-binding protein)	TAPBP NGS17 TAPA	0.825444	0.637728	0.54567	-0.989121		1.12548	0.588464	2.11654	1.77213	0.987434		0.238419	1
Q24JP5	Transmembrane protein 132A (HSPA5-binding protein 1)	TMEM132A HSPA5BP1 KIAA1583	1.3266	1.73498	2.35457	1.45703		1.11502	0.824648	0.741593	0.844144	-0.539691	+	1.50614	1
P10909	Clusterin (Aging-associated gene 4 protein) (Apolipoprotein J) (Apo-J) (Complement cytolysis inhibitor) (CLI) (Complement-associated protein SP-40,40) (Ku70-binding protein 1) (NA1/NA2) (Sulfated glycoprotein 2) (SGP-2) (Testosterone-repressed prostate message 2) (TRPM-2) [Cleaved into: Clusterin beta chain (ApoJalpha) (Complement cytolysis inhibitor a chain); Clusterin alpha chain (ApoJbeta) (Co…	CLU APOJ CLI KUB1 AAG4	0.336056	0.472266	0.552511	-1.94965	+	1.50596	0.879832	0.805786	0.76858	-0.495263	+	1.44092	1
Q9BTU6	Phosphatidylinositol 4-kinase type 2-alpha (EC 2.7.1.67) (Phosphatidylinositol 4-kinase type II-alpha)	PI4K2A	1.76102	1.84203	1.03958	1.07696		0.801062	0.750109	0.821405	1.18849	-0.205637		0.269731	1
Q8TEQ0	Sorting nexin-29 (RUN domain-containing protein 2A)	SNX29 RUNDC2A	1.13604	1.23677		0.421565		0.807279	0.894891	0.940776		-0.211458		0.744704	1
Q9H3Z4	DnaJ homolog subfamily C member 5 (Ceroid-lipofuscinosis neuronal protein 4) (Cysteine string protein) (CSP)	DNAJC5 CLN4	1.73422	1.55926	1.01323	0.891724		0.750699	0.999776	0.908912	1.80121	0.523821		0.28165	1
P10321	HLA class I histocompatibility antigen, C alpha chain (HLA-C) (HLA-Cw) (Human leukocyte antigen C)	HLA-C HLAC	1.07983	1.3495	1.32524	0.553343		1.03724	0.897332	0.847144	1.06276	-0.163789		0.391772	1
O75503	Ceroid-lipofuscinosis neuronal protein 5 (Protein CLN5) [Cleaved into: Ceroid-lipofuscinosis neuronal protein 5, secreted form]	CLN5	1.19394		1.39396	0.635566		0.726028	2.53021	2.74964	0.81782	1.74933		0.558227	1
Q8TB96	T-cell immunomodulatory protein (Protein TIP) (Integrin-alpha FG-GAP repeat-containing protein 1) (Linkin)	ITFG1 LNKN-1 TIP CDA08	1.12102	0.968553		0.108056		0.171584	1.1779	1.27996		0.508411		0.895718	1
P53634	Dipeptidyl peptidase 1 (EC 3.4.14.1) (Cathepsin C) (Cathepsin J) (Dipeptidyl peptidase I) (DPP-I) (DPPI) (Dipeptidyl transferase) [Cleaved into: Dipeptidyl peptidase 1 exclusion domain chain (Dipeptidyl peptidase I exclusion domain chain); Dipeptidyl peptidase 1 heavy chain (Dipeptidyl peptidase I heavy chain); Dipeptidyl peptidase 1 light chain (Dipeptidyl peptidase I light chain)]	CTSC CPPI	0.965961	1.07805	1.27931	0.25243		0.440483	0.797668	0.827467	0.749475	-0.57657	+	1.82878	1
P28799	Progranulin (PGRN) (Acrogranin) (Epithelin precursor) (Glycoprotein of 88 Kda) (GP88) (Glycoprotein 88) (Granulin precursor) (PC cell-derived growth factor) (PCDGF) (Proepithelin) (PEPI) [Cleaved into: Paragranulin; Granulin-1 (Granulin G); Granulin-2 (Granulin F); Granulin-3 (Epithelin-2) (Granulin B); Granulin-4 (Epithelin-1) (Granulin A); Granulin-5 (Granulin C); Granulin-6 (Granulin D); Granu…	GRN	0.788689	1.22546	1.04989	0.0520891		0.0117423	0.988558	1.00246	0.848042	-0.135993		0.406182	1
P08754	Guanine nucleotide-binding protein G(i) subunit alpha-3 (G(i) alpha-3)	GNAI3	1.27337	1.10536	0.842966	0.175836		0.164946	1.03618	0.977867	1.38744	0.309765		0.39326	1
Q9UM47	Neurogenic locus notch homolog protein 3 (Notch 3) [Cleaved into: Notch 3 extracellular truncation; Notch 3 intracellular domain]	NOTCH3	1.00946	1.18679	1.09983	0.232131		0.725601	1.11391	1.03904	0.904576	0.0468482		0.0830632	1
P35613	Basigin (5F7) (Collagenase stimulatory factor) (Extracellular matrix metalloproteinase inducer) (EMMPRIN) (Hepatoma-associated antigen) (HAb18G) (Leukocyte activation antigen M6) (OK blood group antigen) (Tumor cell-derived collagenase stimulatory factor) (TCSF) (CD antigen CD147)	BSG UNQ6505/PRO21383	1.11752	0.93171	0.991687	0.0334089		0.0655585	1.11243	1.27953	1.24392	0.474118	+	1.32943	1
P16070	CD44 antigen (CDw44) (Epican) (Extracellular matrix receptor III) (ECMR-III) (GP90 lymphocyte homing/adhesion receptor) (HUTCH-I) (Heparan sulfate proteoglycan) (Hermes antigen) (Hyaluronate receptor) (Phagocytic glycoprotein 1) (PGP-1) (Phagocytic glycoprotein I) (PGP-I) (CD antigen CD44)	CD44 LHR MDU2 MDU3 MIC4	1.16977	1.28762	0.985805	0.339825		0.631387	1.17849	1.62068	1.55938	0.921227		1.16471	1
P07711	Procathepsin L (EC 3.4.22.15) (Cathepsin L1) (Major excreted protein) (MEP) [Cleaved into: Cathepsin L; Cathepsin L heavy chain; Cathepsin L light chain]	CTSL CTSL1	0.961951			-0.0956731			0.765866			-0.657883			1
O00220	Tumor necrosis factor receptor superfamily member 10A (Death receptor 4) (TNF-related apoptosis-inducing ligand receptor 1) (TRAIL receptor 1) (TRAIL-R1) (CD antigen CD261)	TNFRSF10A APO2 DR4 TRAILR1	1.89778			1.58013			1.4829			0.971715			1
Q8NC42	E3 ubiquitin-protein ligase RNF149 (EC 2.3.2.27) (DNA polymerase-transactivated protein 2) (RING finger protein 149) (RING-type E3 ubiquitin transferase RNF149)	RNF149 DNAPTP2	1.05417	1.27002		0.370499		0.441649	1.1054	1.02984		0.161373		0.497182	1
P05067	Amyloid-beta precursor protein (APP) (ABPP) (APPI) (Alzheimer disease amyloid A4 protein homolog) (Alzheimer disease amyloid protein) (Amyloid precursor protein) (Amyloid-beta (A4) precursor protein) (Amyloid-beta A4 protein) (Cerebral vascular amyloid peptide) (CVAP) (PreA4) (Protease nexin-II) (PN-II) [Cleaved into: N-APP; Soluble APP-alpha (S-APP-alpha); Soluble APP-beta (S-APP-beta); C99 (Bet…	APP A4 AD1	0.935233	1.33894	1.40641	0.504258		0.552776	1.21031	0.887464	0.918112	0.0130231		0.0147732	1
Q687X5	Metalloreductase STEAP4 (EC 1.16.1.9) (Six-transmembrane epithelial antigen of prostate 4) (SixTransMembrane protein of prostate 2) (Tumor necrosis factor, alpha-induced protein 9)	STEAP4 STAMP2 TNFAIP9	0.663732			-1.01088			0.736144			-0.755501			1
O14773	Tripeptidyl-peptidase 1 (TPP-1) (EC 3.4.14.9) (Cell growth-inhibiting gene 1 protein) (Lysosomal pepstatin-insensitive protease) (LPIC) (Tripeptidyl aminopeptidase) (Tripeptidyl-peptidase I) (TPP-I)	TPP1 CLN2 GIG1 UNQ267/PRO304	0.827563	1.11767	1.06518	0.00854902		0.0166431	0.86637	1.08522	0.946844	-0.0849428		0.211838	1
Q96PD2	Discoidin, CUB and LCCL domain-containing protein 2 (CUB, LCCL and coagulation factor V/VIII-homology domains protein 1) (Endothelial and smooth muscle cell-derived neuropilin-like protein)	DCBLD2 CLCP1 ESDN	1.58285	1.83887	1.70569	1.32191	+	2.18693	1.1165	1.2187	1.37542	0.524297		1.12772	1
O95721	Synaptosomal-associated protein 29 (SNAP-29) (Soluble 29 kDa NSF attachment protein) (Vesicle-membrane fusion protein SNAP-29)	SNAP29	1.63835	1.31079	1.33118	0.876557	+	1.40124	0.86616	1.51277	0.909012	0.226033		0.110769	1
Q9HB40	Retinoid-inducible serine carboxypeptidase (EC 3.4.16.-) (Serine carboxypeptidase 1)	SCPEP1 RISC SCP1 MSTP034 UNQ265/PRO302	0.899903			-0.260117			0.637528			-1.11022			1
P07948	Tyrosine-protein kinase Lyn (EC 2.7.10.2) (Lck/Yes-related novel protein tyrosine kinase) (V-yes-1 Yamaguchi sarcoma viral related oncogene homolog) (p53Lyn) (p56Lyn)	LYN JTK8	1.29333	1.04563	0.953847	0.229681		0.350692	1.05689	1.13106	1.44241	0.470363		0.711468	1
Q13596	Sorting nexin-1	SNX1	1.20894	0.968495	1.1531	0.257782		0.558922	0.914566	1.21759	1.10217	0.185485		0.300069	1
O15126	Secretory carrier-associated membrane protein 1 (Secretory carrier membrane protein 1)	SCAMP1 SCAMP	1.76073	1.6376	0.766905	0.809341		0.372143	1.17138	0.730682	2.04844	0.678801		0.226179	1
Q8IWU5	Extracellular sulfatase Sulf-2 (hSulf-2) (Arylsulfatase) (EC 3.1.6.1) (N-acetylglucosamine-6-sulfatase) (EC 3.1.6.14) [Cleaved into: Extracellular sulfatase Sulf-2 secreted form]	SULF2 KIAA1247 UNQ559/PRO1120	0.618961	0.794392	1.43765	-0.12564		0.161736	0.954409	0.677146	0.783947	-0.53446		0.823182	1
Q8TD43	Transient receptor potential cation channel subfamily M member 4 (hTRPM4) (Calcium-activated non-selective cation channel 1) (Long transient receptor potential channel 4) (LTrpC-4) (LTrpC4) (Melastatin-4)	TRPM4 LTRPC4	1.44318	1.04383	0.787964	0.216292		0.110807	0.860914	0.637329	1.21307	-0.249535		0.266464	1
P06280	Alpha-galactosidase A (EC 3.2.1.22) (Alpha-D-galactosidase A) (Alpha-D-galactoside galactohydrolase) (Galactosylgalactosylglucosylceramidase GLA) (Melibiase) (Agalsidase)	GLA	0.903845	0.746658	1.00137	-0.304212		0.571627	0.627719	0.96129	0.930946	-0.430052		0.529077	1
P13473	Lysosome-associated membrane glycoprotein 2 (LAMP-2) (Lysosome-associated membrane protein 2) (CD107 antigen-like family member B) (LGP-96) (CD antigen CD107b)	LAMP2	0.735328	1.06659	0.834257	-0.318849		0.488541	0.536964	0.56136	0.627986	-1.36294	+	2.15627	1
P62491	Ras-related protein Rab-11A (Rab-11) (EC 3.6.5.2) (YL8)	RAB11A RAB11	1.42277			0.86964			0.945164			-0.139091			1
O14672	Disintegrin and metalloproteinase domain-containing protein 10 (ADAM 10) (EC 3.4.24.81) (CDw156) (Kuzbanian protein homolog) (Mammalian disintegrin-metalloprotease) (CD antigen CD156c)	ADAM10 KUZ MADM	1.55234	1.1713	1.53521	0.864162		1.1844	1.00197	1.27178	1.14448	0.321879		0.678106	1
Q92520	Protein FAM3C (Interleukin-like EMT inducer)	FAM3C ILEI GS3786	1.42124	1.32704	0.744974	0.375419		0.196816	1.12837	1.08936	2.19747	0.953084		0.546893	1
P98160	Basement membrane-specific heparan sulfate proteoglycan core protein (HSPG) (Perlecan) (PLC) [Cleaved into: Endorepellin; LG3 peptide]	HSPG2	1.97715	3.41952	3.25732	2.61282	+	1.55811	0.79336	0.410917	0.743714	-1.06498		0.816124	1
Q86Y82	Syntaxin-12	STX12	1.31273	1.16629	0.84024	0.24942		0.22654	0.908153	1.06812	1.41185	0.300061		0.299824	1
Q8WXI7	Mucin-16 (MUC-16) (Ovarian cancer-related tumor marker CA125) (CA-125) (Ovarian carcinoma antigen CA125)	MUC16 CA125	0.774455	1.02526	1.14592	-0.0451026		0.0902133	1.17901	0.988666	1.00065	0.134642		0.335722	1
P29966	Myristoylated alanine-rich C-kinase substrate (MARCKS) (Protein kinase C substrate, 80 kDa protein, light chain) (80K-L protein) (PKCSL)	MARCKS MACS PRKCSL	1.2458	1.59427	1.09475	0.668997		0.843561	1.10667	1.10516	0.957312	0.135278		0.410621	1
Q15043	Metal cation symporter ZIP14 (LIV-1 subfamily of ZIP zinc transporter 4) (LZT-Hs4) (Solute carrier family 39 member 14) (Zrt- and Irt-like protein 14) (ZIP-14)	SLC39A14 KIAA0062 ZIP14	1.23392	1.3282	1.1291	0.511373	+	1.31342	0.907485	0.730912	1.07436	-0.248221		0.379193	1
Q5TH69	Brefeldin A-inhibited guanine nucleotide-exchange protein 3 (ARFGEF family member 3)	ARFGEF3 BIG3 C6orf92 KIAA1244	1.18129	1.34906	1.05852	0.44202		0.883284	0.669972	0.697816	0.98653	-0.597737		0.768551	1
O00391	Sulfhydryl oxidase 1 (hQSOX) (EC 1.8.3.2) (Quiescin Q6)	QSOX1 QSCN6 UNQ2520/PRO6013	0.740485	0.801268	0.836876	-0.572399	+	1.64296	1.27897	1.2115	0.912859	0.311103		0.415504	1
Q29980	MHC class I polypeptide-related sequence B (MIC-B)	MICB PERB11.2	0.813164			-0.510087			0.819593			-0.490664			1
Q7L5N7	Lysophosphatidylcholine acyltransferase 2 (LPC acyltransferase 2) (LPCAT-2) (LysoPC acyltransferase 2) (EC 2.3.1.23) (1-acylglycerol-3-phosphate O-acyltransferase 11) (1-AGP acyltransferase 11) (1-AGPAT 11) (EC 2.3.1.51) (1-acylglycerophosphocholine O-acyltransferase) (1-alkenylglycerophosphocholine O-acyltransferase) (EC 2.3.1.25) (1-alkylglycerophosphocholine O-acetyltransferase) (EC 2.3.1.67) …	LPCAT2 AGPAT11 AYTL1	1.90418	1.3892	0.904763	0.828754		0.508947	0.877886	0.748319	1.16321	-0.179494		0.252763	1
P42356	Phosphatidylinositol 4-kinase alpha (PI4-kinase alpha) (PI4K-alpha) (PtdIns-4-kinase alpha) (EC 2.7.1.67) (Phosphatidylinositol 4-Kinase III alpha)	PI4KA PIK4 PIK4CA	1.29452	1.22493	1.25268	0.564849	+	2.31135	0.654311	0.706968	1.60949	-0.0241488		0.116173	1
Q12846	Syntaxin-4 (Renal carcinoma antigen NY-REN-31)	STX4 STX4A	1.37364	1.04051	0.871129	0.224038		0.196026	1.05342	1.15309	2.12024	0.903168		0.541212	1
Q07954	Prolow-density lipoprotein receptor-related protein 1 (LRP-1) (Alpha-2-macroglobulin receptor) (A2MR) (Apolipoprotein E receptor) (APOER) (CD antigen CD91) [Cleaved into: Low-density lipoprotein receptor-related protein 1 85 kDa subunit (LRP-85); Low-density lipoprotein receptor-related protein 1 515 kDa subunit (LRP-515); Low-density lipoprotein receptor-related protein 1 intracellular domain (L…	LRP1 A2MR APR	1.24683	1.4385	1.48839	0.814362	+	1.57857	0.90416	0.714419	0.723901	-0.610169		1.09605	1
Q99569	Plakophilin-4 (p0071)	PKP4	1.3194	1.25147	1.54699	0.781127	+	1.40768	1.09519	0.83999	1.01639	-0.0401368		0.095045	1
Q15334	Lethal(2) giant larvae protein homolog 1 (LLGL) (DLG4) (Hugl-1) (Human homolog to the D-lgl gene protein)	LLGL1 DLG4 HUGL HUGL1	1.3771	1.24279	1.03952	0.490031		0.840347	0.908772	0.797	0.9215	-0.327195		0.998644	1
Q9C0B5	Palmitoyltransferase ZDHHC5 (EC 2.3.1.225) (Zinc finger DHHC domain-containing protein 5) (DHHC-5) (Zinc finger protein 375)	ZDHHC5 KIAA1748 ZNF375	1.15302	1.16181	0.854325	0.135282		0.154714	1.2246	1.29778	1.3368	0.62112	+	1.98536	1
Q99653	Calcineurin B homologous protein 1 (Calcineurin B-like protein) (Calcium-binding protein CHP) (Calcium-binding protein p22) (EF-hand calcium-binding domain-containing protein p22)	CHP1 CHP	1.45193	1.20112		0.69689		0.67942	1.01487	1.59582		0.657188		0.318852	1
P55085	Proteinase-activated receptor 2 (PAR-2) (Coagulation factor II receptor-like 1) (G-protein coupled receptor 11) (Thrombin receptor-like 1) [Cleaved into: Proteinase-activated receptor 2, alternate cleaved 1; Proteinase-activated receptor 2, alternate cleaved 2]	F2RL1 GPR11 PAR2	1.36469			0.766842			1.12362			0.28746			1
Q15036	Sorting nexin-17	SNX17 KIAA0064	1.35055	1.08072		0.481584		0.469714	0.863381	0.879147		-0.339882	+	1.37958	1
Q9ULZ3	Apoptosis-associated speck-like protein containing a CARD (hASC) (Caspase recruitment domain-containing protein 5) (PYD and CARD domain-containing protein) (Target of methylation-induced silencing 1)	PYCARD ASC CARD5 TMS1	1.12021		1.81701	0.947842		0.419743	0.898288		0.988803	-0.143318		0.363098	1
Q03169	Tumor necrosis factor alpha-induced protein 2 (TNF alpha-induced protein 2) (Primary response gene B94 protein)	TNFAIP2	1.61857	1.42315	1.51865	1.03286	+	2.10644	0.920163	1.17739	1.27885	0.29151		0.413092	1
Q9NQX7	Integral membrane protein 2C (Cerebral protein 14) (Transmembrane protein BRI3) [Cleaved into: CT-BRI3]	ITM2C BRI3 hucep-14 NPD018 PSEC0047	1.19115	1.14842	1.66026	0.709405		0.83879	1.12269	0.938912	0.757943	-0.152998		0.23827	1
P42345	Serine/threonine-protein kinase mTOR (EC 2.7.11.1) (FK506-binding protein 12-rapamycin complex-associated protein 1) (FKBP12-rapamycin complex-associated protein) (Mammalian target of rapamycin) (mTOR) (Mechanistic target of rapamycin) (Rapamycin and FKBP12 target 1) (Rapamycin target protein 1)	MTOR FRAP FRAP1 FRAP2 RAFT1 RAPT1	1.02627	0.960416	0.658263	-0.310659		0.390855	0.69166	0.571536	1.03492	-0.657329		0.636748	1
P62820	Ras-related protein Rab-1A (EC 3.6.5.2) (YPT1-related protein)	RAB1A RAB1	1.40371	0.953556	0.585013	-0.0479181		0.108996	1.02459	1.10185	1.2987	0.326863		0.676681	1
O95292	Vesicle-associated membrane protein-associated protein B/C (VAMP-B/VAMP-C) (VAMP-associated protein B/C) (VAP-B/VAP-C)	VAPB UNQ484/PRO983	1.19437	1.01868	1.00753	0.174982		0.46566	0.975012	0.914682	1.12171	0.00935664		0.00062732	1
P01130	Low-density lipoprotein receptor (LDL receptor)	LDLR	0.920508	0.732411	1.04907	-0.258034		0.413164	1.11475	0.982116	1.43703	0.403953		0.509278	1
Q13421	Mesothelin (CAK1 antigen) (Pre-pro-megakaryocyte-potentiating factor) [Cleaved into: Megakaryocyte-potentiating factor (MPF); Mesothelin, cleaved form]	MSLN MPF	1.77917	1.76928		1.41409	+	2.50952	1.05791	1.27583		0.380616		0.449271	1
Q9GZZ9	Ubiquitin-like modifier-activating enzyme 5 (Ubiquitin-activating enzyme 5) (ThiFP1) (UFM1-activating enzyme) (Ubiquitin-activating enzyme E1 domain-containing protein 1)	UBA5 UBE1DC1	2.18102			1.92321			0.89907			-0.2624			1
Q13492	Phosphatidylinositol-binding clathrin assembly protein (Clathrin assembly lymphoid myeloid leukemia protein)	PICALM CALM	1.34037	0.984594	1.07397	0.307916		0.477523	0.953093	0.974393	1.30636	0.185124		0.228465	1
Q92485	Acid sphingomyelinase-like phosphodiesterase 3b (ASM-like phosphodiesterase 3b) (EC 3.1.4.-)	SMPDL3B ASML3B ASMLPD	1.88438	1.50408	1.60041	1.25435	+	1.76122	0.988216	0.917594	1.43462	0.265095		0.228513	1
P51809	Vesicle-associated membrane protein 7 (VAMP-7) (Synaptobrevin-like protein 1) (Tetanus-insensitive VAMP) (Ti-VAMP)	VAMP7 SYBL1	1.60714	1.99895	1.0795	1.09967		0.828774	0.892213	0.708854	1.26776	-0.110264		0.151426	1
P07108	Acyl-CoA-binding protein (ACBP) (Diazepam-binding inhibitor) (DBI) (Endozepine) (EP)	DBI	1.32981	3.12016	1.76491	1.7963		0.927971	0.940697	1.27676	1.0085	0.179096		0.251114	1
P51151	Ras-related protein Rab-9A	RAB9A RAB9	1.10848	0.957601	1.13392	0.159165		0.439291	0.810124	1.02948	0.99549	-0.139436		0.305547	1
Q96RQ1	Endoplasmic reticulum-Golgi intermediate compartment protein 2	ERGIC2 ERV41 PTX1 CDA14	0.900431	0.879931		-0.286906		1.20219	1.32724	1.09369		0.471067		0.515765	1
Q9GZM5	Protein YIPF3 (Killer lineage protein 1) (Natural killer cell-specific antigen KLIP1) (YIP1 family member 3) [Cleaved into: Protein YIPF3, 36 kDa form III]	YIPF3 C6orf109 KLIP1	0.930391		0.60586	-0.650615		0.388315	1.16846		1.22918	0.447232		1.05298	1
P61006	Ras-related protein Rab-8A (EC 3.6.5.2) (Oncogene c-mel)	RAB8A MEL RAB8	1.13919	0.787301	0.712724	-0.316011		0.392004	1.13547	0.868603	1.67645	0.504217		0.325579	1
P49815	Tuberin (Tuberous sclerosis 2 protein)	TSC2 TSC4	1.08376	1.0165	0.813032	-0.0723283		0.146105	0.51914	0.565689	0.968434	-0.935177		0.783177	1
Q05655	Protein kinase C delta type (EC 2.7.11.13) (Tyrosine-protein kinase PRKCD) (EC 2.7.10.2) (nPKC-delta) [Cleaved into: Protein kinase C delta type regulatory subunit; Protein kinase C delta type catalytic subunit (Sphingosine-dependent protein kinase-1) (SDK1)]	PRKCD PKCD	1.2992	1.1377	0.918088	0.275825		0.376417	1.11425	1.0423	1.1374	0.230536		1.14233	1
Q9H7Z7	Prostaglandin E synthase 2 (EC 5.3.99.3) (Membrane-associated prostaglandin E synthase-2) (mPGE synthase-2) (Microsomal prostaglandin E synthase 2) (mPGES-2) (Prostaglandin-H(2) E-isomerase) [Cleaved into: Prostaglandin E synthase 2 truncated form]	PTGES2 C9orf15 PGES2	1.27256	1.46799	1.35758	0.769285	+	1.76275	1.15403	1.53588	1.03191	0.53174		0.63584	1
O15127	Secretory carrier-associated membrane protein 2 (Secretory carrier membrane protein 2)	SCAMP2	0.910596	0.820731		-0.355786		0.661187	1.07484	0.812192		-0.143393		0.14715	1
Q9BV57	Acireductone dioxygenase (Acireductone dioxygenase (Fe(2+)-requiring)) (ARD') (Fe-ARD) (EC 1.13.11.54) (Acireductone dioxygenase (Ni(2+)-requiring)) (ARD) (Ni-ARD) (EC 1.13.11.53) (Membrane-type 1 matrix metalloproteinase cytoplasmic tail-binding protein 1) (MTCBP-1) (Submergence-induced protein-like factor) (Sip-L)	ADI1 MTCBP1 HMFT1638	0.804718	0.712308		-0.681675		0.862114	1.0697	1.74919		0.846426		0.372984	1
Q8NF37	Lysophosphatidylcholine acyltransferase 1 (LPC acyltransferase 1) (LPCAT-1) (LysoPC acyltransferase 1) (EC 2.3.1.23) (1-acylglycerol-3-phosphate O-acyltransferase) (EC 2.3.1.51) (1-acylglycerophosphocholine O-acyltransferase) (1-alkenylglycerophosphocholine O-acyltransferase) (EC 2.3.1.25) (1-alkylglycerophosphocholine O-acetyltransferase) (EC 2.3.1.67) (Acetyl-CoA:lyso-platelet-activating factor…	LPCAT1 AYTL2 PFAAP3	1.39043	0.977619	0.662203	0.0247492		0.0530465	0.921013	0.666051	1.53489	0.0982773		0.0260881	1
Q969F9	BLOC-2 complex member HPS3 (Hermansky-Pudlak syndrome 3 protein)	HPS3	1.05356	1.0078	0.485746	-0.403618		0.326067	0.774915	0.544637	0.990436	-0.644618		0.627319	1
Q9UKS6	Protein kinase C and casein kinase substrate in neurons protein 3 (SH3 domain-containing protein 6511)	PACSIN3	0.957531	0.954613	1.20126	0.0915096		0.141595	1.02911	1.04411	1.06541	0.11141	+	1.3341	1
P02751	Fibronectin (FN) (Cold-insoluble globulin) (CIG) [Cleaved into: Anastellin; Ugl-Y1; Ugl-Y2; Ugl-Y3]	FN1 FN	0.43879	0.29743	0.516874	-2.15307	+	1.49926	0.824621	0.710569	0.694056	-0.732367	+	1.51022	1
P61769	Beta-2-microglobulin [Cleaved into: Beta-2-microglobulin form pI 5.3]	B2M CDABP0092 HDCMA22P	1.20482	0.906766	1.09814	0.166656		0.264683	1.0598	1.02032	1.08267	0.130327		1.0275	1
O15439	ATP-binding cassette sub-family C member 4 (EC 7.6.2.-) (EC 7.6.2.2) (EC 7.6.2.3) (MRP/cMOAT-related ABC transporter) (Multi-specific organic anion transporter B) (MOAT-B) (Multidrug resistance-associated protein 4)	ABCC4 MOATB MRP4	0.834703	1.12027	0.767452	-0.239451		0.359926	0.951824	0.804494	1.35889	0.0929352		0.02711	1
O00410	Importin-5 (Imp5) (Importin subunit beta-3) (Karyopherin beta-3) (Ran-binding protein 5) (RanBP5)	IPO5 KPNB3 RANBP5	1.28631	1.05053	0.676548	0.0109817		0.0509831	0.855567	0.757979	1.45489	0.0556312		0.0307239	1
O15118	NPC intracellular cholesterol transporter 1 (Niemann-Pick C1 protein)	NPC1	0.938322		0.742311	-0.429079		0.436511	0.743063		0.81514	-0.615623		0.934629	1
Q9NP72	Ras-related protein Rab-18	RAB18	1.17466	0.951174	0.667808	-0.175761		0.212118	0.961988	0.952012	1.48389	0.307156		0.254281	1
P51572	B-cell receptor-associated protein 31 (BCR-associated protein 31) (Bap31) (6C6-AG tumor-associated antigen) (Protein CDM) (p28)	BCAP31 BAP31 DXS1357E	1.01048	1.03959	0.700464	-0.214122		0.296145	1.20184	0.990103	1.21595	0.314405		0.686489	1
Q9BUP0	EF-hand domain-containing protein D1 (EF-hand domain-containing protein 1) (Swiprosin-2)	EFHD1 SWS2 PP3051	1.28974	1.18075	1.05689	0.399404		0.956954	1.05051	1.1522	0.940755	0.11521		0.270019	1
Q8N335	Glycerol-3-phosphate dehydrogenase 1-like protein (GPD1-L) (EC 1.1.1.8)	GPD1L KIAA0089	1.10749	0.977048		0.102103		0.192216	1.28774	1.16534		0.503611		0.813634	1
O15260	Surfeit locus protein 4	SURF4 SURF-4	1.0307	0.984624		0.0188259		0.0961165	1.06474	0.892376		-0.0534542		0.0858821	1
Q9H0U4	Ras-related protein Rab-1B (EC 3.6.5.2)	RAB1B	1.14718	0.983756	0.65915	-0.178905		0.213953	0.965327	0.85636	1.2304	0.0424578		0.016618	1
O14828	Secretory carrier-associated membrane protein 3 (Secretory carrier membrane protein 3)	SCAMP3 C1orf3 PROPIN1	1.34044	1.22402	0.797535	0.280963		0.199352	0.982116	0.795151	1.47944	0.202494		0.0880743	1
O60488	Long-chain-fatty-acid--CoA ligase 4 (EC 6.2.1.3) (Arachidonate--CoA ligase) (EC 6.2.1.15) (Long-chain acyl-CoA synthetase 4) (LACS 4)	ACSL4 ACS4 FACL4 LACS4	1.10071	1.10255	1.00802	0.167844		0.820162	1.02226	1.08807	1.15566	0.209511		0.84814	1
A2RRP1	NBAS subunit of NRZ tethering complex (Neuroblastoma-amplified gene protein) (Neuroblastoma-amplified sequence)	NBAS NAG	0.996451		0.778554	-0.294337		0.308954	0.926989		1.09256	0.0239837		0.0218752	1
Q5T2E6	Armadillo-like helical domain-containing protein 3	ARMH3 C10orf76	1.07095	1.14412		0.2519		0.698524	1.36067	0.920078		0.323969		0.17512	1
Q6T4R5	Actin remodeling regulator NHS (Congenital cataracts and dental anomalies protein) (Nance-Horan syndrome protein)	NHS	0.631701	0.637202	0.766028	-0.957296	+	1.60641	0.940763	0.874658	0.830914	-0.309366		1.14175	1
Q99640	Membrane-associated tyrosine- and threonine-specific cdc2-inhibitory kinase (EC 2.7.11.1) (Myt1 kinase)	PKMYT1 MYT1	1.07891			0.187326			0.857684			-0.378625			1
P15289	Arylsulfatase A (ASA) (EC 3.1.6.8) (Cerebroside-sulfatase) [Cleaved into: Arylsulfatase A component B; Arylsulfatase A component C]	ARSA	0.708548	1.37706	0.579168	-0.292235		0.265393	0.794267	0.497346	0.883466	-0.793032		0.732599	1
P55327	Tumor protein D52 (Protein N8)	TPD52	1.60084	1.42606	1.53613	1.0343	+	2.18854	1.29686	1.51256	1.20757	0.719963	+	1.30538	1
Q8N3R9	Protein PALS1 (MAGUK p55 subfamily member 5) (Membrane protein, palmitoylated 5) (Protein associated with Lin-7 1)	PALS1 MPP5	0.63623	0.96462	0.75727	-0.593756		0.773363	1.11728	1.02052	1.49923	0.474897		0.579078	1
Q93063	Exostosin-2 (EC 2.4.1.224) (EC 2.4.1.225) (Glucuronosyl-N-acetylglucosaminyl-proteoglycan/N-acetylglucosaminyl-proteoglycan 4-alpha-N-acetylglucosaminyltransferase) (Multiple exostoses protein 2) (Putative tumor suppressor protein EXT2)	EXT2	1.49341			0.989142			1.10519			0.246674			1
P84077	ADP-ribosylation factor 1 (EC 3.6.5.2)	ARF1	1.08621		0.833471	-0.101084		0.112771	1.04719		1.40541	0.503135		0.382726	1
Q8WVM8	Sec1 family domain-containing protein 1 (SLY1 homolog) (Sly1p) (Syntaxin-binding protein 1-like 2)	SCFD1 C14orf163 KIAA0917 STXBP1L2 FKSG23	0.965662	0.95899	0.679962	-0.348558		0.502395	1.16772	1.06964	1.23093	0.357743		1.13783	1
Q13362	Serine/threonine-protein phosphatase 2A 56 kDa regulatory subunit gamma isoform (PP2A B subunit isoform B'-gamma) (PP2A B subunit isoform B56-gamma) (PP2A B subunit isoform PR61-gamma) (PP2A B subunit isoform R5-gamma) (Renal carcinoma antigen NY-REN-29)	PPP2R5C KIAA0044	1.10173		1.16846	0.312521		0.83678	0.91496		1.11426	0.0357735		0.0278914	1
O60248	Protein SOX-15 (Protein SOX-12) (Protein SOX-20)	SOX15 SOX12 SOX20 SOX26 SOX27	0.945812	0.914288	1.25076	0.0894988		0.0878048	1.05535	0.962883	1.00248	0.0169745		0.0769727	1
Q9Y5U9	Immediate early response 3-interacting protein 1	IER3IP1 HSPC039	0.871358			-0.339617			0.880978			-0.312537			1
Q9H2D6	TRIO and F-actin-binding protein (Protein Tara) (Trio-associated repeat on actin)	TRIOBP KIAA1662 TARA HRIHFB2122	1.13329	1.04244	1.34659	0.395859		0.753361	1.09255	1.09813	1.09586	0.224983	+	3.57907	1
Q9Y6M5	Proton-coupled zinc antiporter SLC30A1 (Solute carrier family 30 member 1) (Zinc transporter 1)	SLC30A1 ZNT1	1.08495	0.928304	1.45635	0.35867		0.360995	0.913686	0.892655	1.01662	-0.150016		0.586451	1
P26641	Elongation factor 1-gamma (EF-1-gamma) (eEF-1B gamma)	EEF1G EF1G PRO1608	1.05168	0.969347	0.808931	-0.143907		0.305882	1.14322	1.20365	1.24311	0.442787	+	1.74272	1
Q10472	Polypeptide N-acetylgalactosaminyltransferase 1 (EC 2.4.1.41) (Polypeptide GalNAc transferase 1) (GalNAc-T1) (pp-GaNTase 1) (Protein-UDP acetylgalactosaminyltransferase 1) (UDP-GalNAc:polypeptide N-acetylgalactosaminyltransferase 1) [Cleaved into: Polypeptide N-acetylgalactosaminyltransferase 1 soluble form]	GALNT1	1.07419	1.21432	0.855903	0.115957		0.122416	0.734498	0.870262	1.10256	-0.253169		0.370115	1
P49755	Transmembrane emp24 domain-containing protein 10 (Protein TMED10) (21 kDa transmembrane-trafficking protein) (S31I125) (S31III125) (Tmp-21-I) (Transmembrane protein Tmp21) (p23) (p24 family protein delta-1) (p24delta1) (p24delta)	TMED10 TMP21	0.991707	1.10197	0.698326	-0.17721		0.23615	0.865252	0.97118	1.24014	0.0621569		0.0415466	1
Q7Z5G4	Golgin subfamily A member 7 (Golgi complex-associated protein of 16 kDa)	GOLGA7 GCP16 HDCKB03P HSPC041	1.25455			0.559301			1.05023			0.120868			1
O75882	Attractin (DPPT-L) (Mahogany homolog)	ATRN KIAA0548 MGCA	0.976704		1.10292	0.0962839		0.186868	0.961242		0.937366	-0.128311		0.821679	1
Q5T0Z8	Uncharacterized protein C6orf132	C6orf132	0.834859	0.861277	0.840216	-0.414057	+	2.49717	0.93154	0.830692	1.35066	0.0911013		0.0318895	1
Q96SN8	CDK5 regulatory subunit-associated protein 2 (CDK5 activator-binding protein C48) (Centrosome-associated protein 215)	CDK5RAP2 CEP215 KIAA1633	1.34354			0.72831			0.975854			-0.0602819			1
Q9BXB5	Oxysterol-binding protein-related protein 10 (ORP-10) (OSBP-related protein 10)	OSBPL10 ORP10 OSBP9	1.07895	1.06888	0.941195	0.0721213		0.223119	0.904337	0.869149	1.04676	-0.152389		0.432952	1
P35241	Radixin	RDX	1.26233	0.999892	1.57295	0.60573		0.652406	1.00508	1.1368	0.968044	0.0887511		0.251572	1
P13987	CD59 glycoprotein (1F5 antigen) (20 kDa homologous restriction factor) (HRF-20) (HRF20) (MAC-inhibitory protein) (MAC-IP) (MEM43 antigen) (Membrane attack complex inhibition factor) (MACIF) (Membrane inhibitor of reactive lysis) (MIRL) (Protectin) (CD antigen CD59)	CD59 MIC11 MIN1 MIN2 MIN3 MSK21	1.29183	1.1929	0.652914	0.110643		0.00292859	1.20521	1.4628	1.97238	1.07577		0.994762	1
P62993	Growth factor receptor-bound protein 2 (Adapter protein GRB2) (Protein Ash) (SH2/SH3 adapter GRB2)	GRB2 ASH	1.02043	1.06411	1.34707	0.331511		0.552582	1.21438	1.09824	1.00717	0.24981		0.67689	1
O60513	Beta-1,4-galactosyltransferase 4 (Beta-1,4-GalTase 4) (Beta4Gal-T4) (b4Gal-T4) (EC 2.4.1.-) (Beta-N-acetylglucosaminyl-glycolipid beta-1,4-galactosyltransferase) (Lactotriaosylceramide beta-1,4-galactosyltransferase) (EC 2.4.1.275) (N-acetyllactosamine synthase) (EC 2.4.1.90) (Nal synthase) (UDP-Gal:beta-GlcNAc beta-1,4-galactosyltransferase 4) (UDP-galactose:beta-N-acetylglucosamine beta-1,4-gal…	B4GALT4 UNQ552/PRO1109	0.95261			-0.119737			0.974399			-0.0639615			1
Q9Y282	Endoplasmic reticulum-Golgi intermediate compartment protein 3 (Serologically defined breast cancer antigen NY-BR-84)	ERGIC3 C20orf47 ERV46 SDBCAG84 CGI-54 PRO0989	0.935676	0.806911		-0.339798		0.510478	1.59999	1.13644		0.773207		0.48037	1
Q6ZVM7	TOM1-like protein 2 (Target of Myb-like protein 2)	TOM1L2	1.13032	1.17482	0.983761	0.226757		0.61951	0.852944	0.98301	0.999254	-0.139339		0.44196	1
Q86W92	Liprin-beta-1 (Protein tyrosine phosphatase receptor type f polypeptide-interacting protein-binding protein 1) (PTPRF-interacting protein-binding protein 1) (hSGT2)	PPFIBP1 KIAA1230	1.02635	0.971962	1.23739	0.186538		0.358186	0.944979	0.804614	0.995902	-0.21864		0.544565	1
Q9Y2A7	Nck-associated protein 1 (NAP 1) (Membrane-associated protein HEM-2) (p125Nap1)	NCKAP1 HEM2 KIAA0587 NAP1	1.23244	1.2456	0.805479	0.222715		0.173344	0.99046	0.727517	1.32341	0.0337939		0.0290302	1
Q12929	Epidermal growth factor receptor kinase substrate 8	EPS8	0.811933	0.742515	0.846699	-0.549161	+	1.54415	0.912702	0.8871	0.9306	-0.232235	+	1.67731	1
Q5VIR6	Vacuolar protein sorting-associated protein 53 homolog	VPS53 PP13624	1.27879	1.12359		0.452109		0.660985	0.967096	1.00736		-0.0317067		0.195662	1
Q9BUP3	Oxidoreductase HTATIP2 (EC 1.1.1.-) (30 kDa HIV-1 TAT-interacting protein) (HIV-1 TAT-interactive protein 2)	HTATIP2 CC3 TIP30	0.679431	0.735331	0.81453	-0.732315	+	1.53255	1.09488	1.10944	0.926253	0.105078		0.245349	1
O60645	Exocyst complex component 3 (Exocyst complex component Sec6)	EXOC3 SEC6 SEC6L1	1.21467	2.30275		1.39242		0.450777	0.999948	0.919781	1.13833	0.0472726		0.0818716	1
O43520	Phospholipid-transporting ATPase IC (EC 7.6.2.1) (ATPase class I type 8B member 1) (Familial intrahepatic cholestasis type 1) (P4-ATPase flippase complex alpha subunit ATP8B1)	ATP8B1 ATPIC FIC1 PFIC	0.767467			-0.65273			1.11449			0.267341			1
Q15599	Na(+)/H(+) exchange regulatory cofactor NHE-RF2 (NHERF-2) (NHE3 kinase A regulatory protein E3KARP) (SRY-interacting protein 1) (SIP-1) (Sodium-hydrogen exchanger regulatory factor 2) (Solute carrier family 9 isoform A3 regulatory factor 2) (Tyrosine kinase activator protein 1) (TKA-1)	NHERF2 SLC9A3R2	1.31982	1.40342	1.48924	0.837158	+	1.98051	0.962614	1.18882	1.18539	0.262426		0.548191	1
Q01082	Spectrin beta chain, non-erythrocytic 1 (Beta-II spectrin) (Fodrin beta chain) (Spectrin, non-erythroid beta chain 1)	SPTBN1 SPTB2	1.01728	1.11023	1.14761	0.216405		0.860036	1.01188	0.933429	1.12861	0.0600349		0.133169	1
Q15642	Cdc42-interacting protein 4 (Protein Felic) (Salt tolerant protein) (hSTP) (Thyroid receptor-interacting protein 10) (TR-interacting protein 10) (TRIP-10)	TRIP10 CIP4 STOT STP	1.54225	1.18014	1.93103	1.08268		1.00602	1.01756	0.975851	0.966482	-0.033191		0.321268	1
Q96M27	Protein PRRC1 (Proline-rich and coiled-coil-containing protein 1)	PRRC1	1.29589	1.31737	1.02599	0.476405		0.833596	1.15018	1.25575	1.1477	0.417692	+	1.52898	1
P60520	Gamma-aminobutyric acid receptor-associated protein-like 2 (GABA(A) receptor-associated protein-like 2) (Ganglioside expression factor 2) (GEF-2) (General protein transport factor p16) (Golgi-associated ATPase enhancer of 16 kDa) (GATE-16) (MAP1 light chain 3-related protein)	GABARAPL2 FLC3A GEF2	0.94053	1.21797	1.30209	0.352258		0.506975	1.36998	1.33853	1.13419	0.610568		1.26326	1
Q8N4C8	Misshapen-like kinase 1 (EC 2.7.11.1) (GCK family kinase MiNK) (MAPK/ERK kinase kinase kinase 6) (MEK kinase kinase 6) (MEKKK 6) (Misshapen/NIK-related kinase) (Mitogen-activated protein kinase kinase kinase kinase 6)	MINK1 B55 MAP4K6 MINK YSK2 ZC3	1.10899	1.25435	1.65931	0.723434		0.840804	1.11395	1.034	0.994928	0.114755		0.516661	1
P19793	Retinoic acid receptor RXR-alpha (Nuclear receptor subfamily 2 group B member 1) (Retinoid X receptor alpha)	RXRA NR2B1	0.978775	1.1553	0.806765	-0.0491237		0.0991876	1.16101	1.06206	1.18685	0.315875		1.18896	1
Q5W111	SPRY domain-containing protein 7 (Chronic lymphocytic leukemia deletion region gene 6 protein) (CLL deletion region gene 6 protein)	SPRYD7 C13orf1 CLLD6	1.25473	1.08398	0.789212	0.102983		0.0560672	1.05391	1.04273	1.18137	0.218581		0.792331	1
Q13057	Bifunctional coenzyme A synthase (CoA synthase) (NBP) (POV-2) [Includes: Phosphopantetheine adenylyltransferase (EC 2.7.7.3) (Dephospho-CoA pyrophosphorylase) (Pantetheine-phosphate adenylyltransferase) (PPAT); Dephospho-CoA kinase (DPCK) (EC 2.7.1.24) (Dephosphocoenzyme A kinase) (DPCOAK)]	COASY PSEC0106	1.56136	1.15267	1.40171	0.779862		1.13164	1.1272	1.321	1.25728	0.520885	+	1.32994	1
O14980	Exportin-1 (Exp1) (Chromosome region maintenance 1 protein homolog)	XPO1 CRM1	1.28671	1.15183	0.684691	0.0992767		0.00777706	0.971412	0.866484	1.65148	0.372684		0.196474	1
Q99439	Calponin-2 (Calponin H2, smooth muscle) (Neutral calponin)	CNN2	1.17383	1.13795	1.46299	0.566572		0.975246	0.964059	1.38636	1.11241	0.353848		0.471913	1
P25054	Adenomatous polyposis coli protein (Protein APC) (Deleted in polyposis 2.5)	APC DP2.5	0.958996	1.02534	1.19736	0.145028		0.305547	0.824711	0.652789	0.890524	-0.58342		0.921868	1
Q8TB61	Adenosine 3'-phospho 5'-phosphosulfate transporter 1 (PAPS transporter 1) (Putative MAPK-activating protein PM15) (Putative NF-kappa-B-activating protein 48) (Solute carrier family 35 member B2)	SLC35B2 PAPST1 PSEC0149	0.689047	0.859432	0.634947	-0.783588		1.16094	1.35535	0.650746	1.30312	0.241937		0.0636796	1
Q9NXE4	Sphingomyelin phosphodiesterase 4 (EC 3.1.4.12) (Neutral sphingomyelinase 3) (nSMase-3) (nSMase3) (Neutral sphingomyelinase III)	SMPD4 KIAA1418 SKNY	1.22176	1.13767	0.752777	0.0905662		0.0317721	1.04319	1.08239	1.58706	0.525645		0.546343	1
Q9NRD5	PRKCA-binding protein (Protein interacting with C kinase 1) (Protein kinase C-alpha-binding protein)	PICK1 PRKCABP	1.37895	1.13883		0.567818		0.593021	0.778477	0.959908		-0.345752		0.401332	1
P11166	Solute carrier family 2, facilitated glucose transporter member 1 (Glucose transporter type 1, erythrocyte/brain) (GLUT-1) (HepG2 glucose transporter)	SLC2A1 GLUT1	0.872362	0.762191	0.655816	-0.665653		1.10555	1.78183	1.62232	1.97418	1.43974	+	2.02689	1
P11274	Breakpoint cluster region protein (EC 2.7.11.1) (Renal carcinoma antigen NY-REN-26)	BCR BCR1 D22S11	1.1049	0.898809	1.0597	0.051588		0.090223	1.10708	0.871915	1.2071	0.148434		0.185345	1
Q07960	Rho GTPase-activating protein 1 (CDC42 GTPase-activating protein) (GTPase-activating protein rhoGAP) (Rho-related small GTPase protein activator) (Rho-type GTPase-activating protein 1) (p50-RhoGAP)	ARHGAP1 CDC42GAP RHOGAP1	1.49167	1.37086	1.18884	0.74098	+	1.33213	0.896149	0.995573	1.27377	0.132435		0.141411	1
Q7Z7H5	Transmembrane emp24 domain-containing protein 4 (Endoplasmic reticulum stress-response protein 25) (ERS25) (GMP25iso) (Putative NF-kappa-B-activating protein 156) (p24 family protein alpha-3) (p24alpha3)	TMED4 ERS25	0.930567	0.872616	0.929875	-0.229838	+	1.318	1.95269	1.04537	1.13428	0.789794		0.538087	1
O75844	CAAX prenyl protease 1 homolog (EC 3.4.24.84) (Farnesylated proteins-converting enzyme 1) (FACE-1) (Prenyl protein-specific endoprotease 1) (Zinc metalloproteinase Ste24 homolog)	ZMPSTE24 FACE1 STE24	0.82507	0.855616	0.467456	-0.823768		0.699798	1.14906	0.862254	1.06126	0.0589575		0.0639512	1
Q96S66	Chloride channel CLIC-like protein 1 (Mid-1-related chloride channel protein 1)	CLCC1 KIAA0761 MCLC	1.28234	1.02183	0.902118	0.164015		0.192217	1.02734	0.669884	1.45521	0.12224		0.000674511	1
Q92609	TBC1 domain family member 5	TBC1D5 KIAA0210	1.0847	1.10728		0.22605		1.14702	0.872749	0.812344		-0.422543		0.88312	1
Q9NX02	NACHT, LRR and PYD domains-containing protein 2 (Nucleotide-binding site protein 1) (PYRIN domain and NACHT domain-containing protein 1) (PYRIN-containing APAF1-like protein 2)	NLRP2 NALP2 NBS1 PAN1 PYPAF2	1.21323	0.988432	0.721347	-0.0641174		0.10815	0.896159	0.809013	1.23978	-0.0456775		0.0924414	1
Q8IUH4	Palmitoyltransferase ZDHHC13 (EC 2.3.1.225) (Huntingtin-interacting protein 14-related protein) (HIP14-related protein) (Huntingtin-interacting protein HIP3RP) (Putative MAPK-activating protein PM03) (Putative NF-kappa-B-activating protein 209) (Zinc finger DHHC domain-containing protein 13) (DHHC-13)	ZDHHC13 HIP14L HIP3RP	1.36125	1.00623		0.416011		0.312301	0.839892	0.861919		-0.398194		1.29326	1
Q9Y5L0	Transportin-3 (Importin-12) (Imp12) (Transportin-SR) (TRN-SR)	TNPO3 IPO12	1.28842	1.20655	0.798239	0.229982		0.168431	0.942913	0.75734	1.77247	0.360886		0.103978	1
Q09666	Neuroblast differentiation-associated protein AHNAK (Desmoyokin)	AHNAK PM227	0.946335	1.12868	0.936602	0.00953148		0.000664822	1.03267	1.15827	0.994062	0.147586		0.473686	1
Q14247	Src substrate cortactin (Amplaxin) (Oncogene EMS1)	CTTN EMS1	1.07479	1.36898	1.31861	0.558474		1.0047	1.23928	0.994902	0.840922	0.06098		0.0341852	1
Q5MNZ6	WD repeat domain phosphoinositide-interacting protein 3 (WIPI-3) (WD repeat-containing protein 45-like) (WDR45-like protein) (WD repeat-containing protein 45B) (WIPI49-like protein)	WDR45B WDR45L WIPI3	1.20065	0.974593	0.968524	0.115447		0.211497	1.15013	1.02576	0.968274	0.115761		0.325154	1
Q9BTV4	Transmembrane protein 43 (Protein LUMA)	TMEM43 UNQ2564/PRO6244	1.40389	1.18602	0.516234	0.0857587		0.0528577	0.988436	0.921679	2.9942	1.21219		0.324961	1
Q8NBZ7	UDP-glucuronic acid decarboxylase 1 (EC 4.1.1.35) (UDP-glucuronate decarboxylase 1) (UGD) (UXS-1) (hUXS) (hUXS1)	UXS1 UNQ2538/PRO6079	1.20564	1.27418	1.69663	0.815975		1.02414	1.05045	1.146	0.968216	0.131786		0.393416	1
Q9H7E2	Tudor domain-containing protein 3	TDRD3	0.913519	7.55141	1.07109	2.85219		0.366768	0.895217	1.34808	1.0598	0.23738		0.250868	1
P31431	Syndecan-4 (SYND4) (Amphiglycan) (Ryudocan core protein)	SDC4		1.51006	1.62141	1.10579		1.29693		1.79252	1.24544	1.03101		0.567034	1
Q8NFY9	Kelch repeat and BTB domain-containing protein 8 (T-cell activation kelch repeat protein) (TA-KRP)	KBTBD8 KIAA1842 TAKRP		3.32782		2.96528				5.74896		4.31361			1
Q06828	Fibromodulin (FM) (Collagen-binding 59 kDa protein) (Keratan sulfate proteoglycan fibromodulin) (KSPG fibromodulin)	FMOD FM SLRR2E		1.45331		0.922019				0.905561		-0.244659			1
Q9HD26	Golgi-associated PDZ and coiled-coil motif-containing protein (CFTR-associated ligand) (Fused in glioblastoma) (PDZ protein interacting specifically with TC10) (PIST)	GOPC CAL FIG	1.15283	1.20327	1.12378	0.365964	+	1.75271	0.92267	0.892317	0.972234	-0.181439		1.01325	1
P08648	Integrin alpha-5 (CD49 antigen-like family member E) (Fibronectin receptor subunit alpha) (Integrin alpha-F) (VLA-5) (CD antigen CD49e) [Cleaved into: Integrin alpha-5 heavy chain; Integrin alpha-5 light chain]	ITGA5 FNRA		1.43812		0.896099				1.87737		1.55346			1
Q04721	Neurogenic locus notch homolog protein 2 (Notch 2) (hN2) [Cleaved into: Notch 2 extracellular truncation (N2ECD); Notch 2 intracellular domain (N2ICD)]	NOTCH2	1.30226	1.31707	1.58559	0.832731	+	1.45939	1.06363	0.921923	1.06886	0.044327		0.109356	1
P61204	ADP-ribosylation factor 3	ARF3		1.34023		0.72223				1.17938		0.406916			1
Q92508	Piezo-type mechanosensitive ion channel component 1 (Membrane protein induced by beta-amyloid treatment) (Mib) (Protein FAM38A)	PIEZO1 FAM38A KIAA0233	1.05403	1.33782	0.979298	0.287674		0.429994	1.01893	0.609698	1.1436	-0.194746		0.210942	1
P17612	cAMP-dependent protein kinase catalytic subunit alpha (PKA C-alpha) (EC 2.7.11.11)	PRKACA PKACA		1.95048	0.988206	0.949071		0.29132		0.865525	1.38186	0.287619		0.115004	1
O43852	Calumenin (Crocalbin) (IEF SSP 9302)	CALU	1.09606	2.37722	1.41705	1.20515		0.707833	0.974943	1.83899	1.0128	0.600291		0.361251	1
P40189	Interleukin-6 receptor subunit beta (IL-6 receptor subunit beta) (IL-6R subunit beta) (IL-6R-beta) (IL-6RB) (CDw130) (Interleukin-6 signal transducer) (Membrane glycoprotein 130) (gp130) (Oncostatin-M receptor subunit alpha) (CD antigen CD130)	IL6ST	0.861985	1.20891		0.085913		0.0348788	0.838376	0.716182		-0.6214		0.719683	1
Q7Z3C6	Autophagy-related protein 9A (APG9-like 1) (mATG9)	ATG9A APG9L1	0.873373	1.44439		0.363671		0.139895	1.04107	0.651798		-0.411194		0.252057	1
Q9BV40	Vesicle-associated membrane protein 8 (VAMP-8) (Endobrevin) (EDB)	VAMP8		1.47352		0.956081				0.791072		-0.578017			1
P41221	Protein Wnt-5a	WNT5A		0.466357		-1.88131				0.67035		-0.986411			1
P07947	Tyrosine-protein kinase Yes (EC 2.7.10.2) (Proto-oncogene c-Yes) (p61-Yes)	YES1 YES	1.27298	1.02914	1.06366	0.283735		0.626865	0.894153	1.097	1.24669	0.188166		0.251785	1
Q02818	Nucleobindin-1 (CALNUC)	NUCB1 NUC	0.829819	1.29029	1.09558	0.171234		0.142836	1.02445	1.28888	1.01093	0.253127		0.460268	1
Q9UKM7	Endoplasmic reticulum mannosyl-oligosaccharide 1,2-alpha-mannosidase (EC 3.2.1.113) (ER alpha-1,2-mannosidase) (ER mannosidase 1) (ERMan1) (Man9GlcNAc2-specific-processing alpha-mannosidase) (Mannosidase alpha class 1B member 1)	MAN1B1 UNQ747/PRO1477		1.78152	0.801076	0.630504		0.134624		0.950307	1.55	0.550642		0.241308	1
Q9NR31	GTP-binding protein SAR1a (COPII-associated small GTPase)	SAR1A SAR1 SARA SARA1	1.20203	1.28941	0.988463	0.36598		0.666224	1.11019	1.47897	1.30903	0.645929		1.03728	1
Q8TAD4	Proton-coupled zinc antiporter SLC30A5 (Solute carrier family 30 member 5) (Zinc transporter 5) (ZnT-5) (ZnT-like transporter 1) (hZTL1)	SLC30A5 ZNT5 ZNTL1 ZTL1 UNQ863/PRO1879		1.27113		0.59168				1.05209		0.125235			1
Q6IQ22	Ras-related protein Rab-12	RAB12	0.980839	0.866761	0.714581	-0.389069		0.671191	1.01526	0.920301	1.48343	0.322429		0.273551	1
Q96S19	Methyltransferase-like 26	METTL26 JFP2 C16orf13	0.908695	0.986776	0.758929	-0.30186		0.620292	1.33301	1.63662	1.06217	0.729044		0.812394	1
P01111	GTPase NRas (EC 3.6.5.2) (Transforming protein N-Ras)	NRAS HRAS1		0.991922	1.0039	-0.0051549		0.105144		1.35147	1.08286	0.484682		0.474302	1
Q15907	Ras-related protein Rab-11B (EC 3.6.5.2) (GTP-binding protein YPT3)	RAB11B YPT3		1.42687		0.87673				1.35172		0.743285			1
P46934	E3 ubiquitin-protein ligase NEDD4 (EC 2.3.2.26) (Cell proliferation-inducing gene 53 protein) (HECT-type E3 ubiquitin transferase NEDD4) (Neural precursor cell expressed developmentally down-regulated protein 4) (NEDD-4)	NEDD4 KIAA0093 NEDD4-1 RPF1 PIG53	1.17164	1.36732	0.881982	0.323833		0.333297	0.875384	0.800328	1.09385	-0.197113		0.356203	1
Q99102	Mucin-4 (MUC-4) (Ascites sialoglycoprotein) (ASGP) (Pancreatic adenocarcinoma mucin) (Testis mucin) (Tracheobronchial mucin) [Cleaved into: Mucin-4 alpha chain (Ascites sialoglycoprotein 1) (ASGP-1); Mucin-4 beta chain (Ascites sialoglycoprotein 2) (ASGP-2)]	MUC4	0.643094	0.588323	0.661576	-1.13562	+	2.23566	0.974727	1.13965	1.18269	0.232871		0.577547	1
P61026	Ras-related protein Rab-10 (EC 3.6.5.2)	RAB10	1.81502	0.964946	0.763176	0.410394		0.128172	0.959242	0.795289	1.68206	0.335088		0.126495	1
Q08722	Leukocyte surface antigen CD47 (Antigenic surface determinant protein OA3) (Integrin-associated protein) (IAP) (Protein MER6) (CD antigen CD47)	CD47 MER6	1.27988	1.30908	1.32987	0.658945	+	2.76222	1.11411	1.09002	1.25565	0.351682		1.06861	1
Q01968	Inositol polyphosphate 5-phosphatase OCRL (EC 3.1.3.36) (EC 3.1.3.56) (Inositol polyphosphate 5-phosphatase OCRL-1) (OCRL-1) (Lowe oculocerebrorenal syndrome protein) (Phosphatidylinositol 3,4,5-triphosphate 5-phosphatase) (EC 3.1.3.86)	OCRL OCRL1	1.65129	1.07483	1.48534	0.836558		0.88788	0.895024	1.25492	0.960322	0.08902		0.0812993	1
Q9C0D3	Protein zyg-11 homolog B	ZYG11B KIAA1730	1.07875	1.08822	0.751923	-0.0675931		0.116182	0.943911	0.9268	1.39097	0.206257		0.173824	1
P62330	ADP-ribosylation factor 6 (EC 3.6.5.2)	ARF6		1.09872	0.628055	-0.362278		0.202635		1.55131	1.95825	1.38691		0.880876	1
Q6RW13	Type-1 angiotensin II receptor-associated protein (AT1 receptor-associated protein)	AGTRAP ATRAP	1.0572	1.17443	0.927281	0.127298		0.249548	1.08265	0.750716	1.06856	-0.0819726		0.134936	1
P63172	Dynein light chain Tctex-type 1 (Protein CW-1) (T-complex testis-specific protein 1 homolog)	DYNLT1 TCTEL1 TCTEX-1 TCTEX1	0.840265	1.26361	0.936984	0.0333607		0.00434985	0.895864	1.36192	1.15588	0.318584		0.350397	1
Q86SZ2	Trafficking protein particle complex subunit 6B (TRAPP complex subunit 6B)	TRAPPC6B	0.971894	0.945562	1.04922	-0.027549		0.134306	0.953506	1.2397	1.10066	0.230477		0.435218	1
Q5VT25	Serine/threonine-protein kinase MRCK alpha (EC 2.7.11.1) (CDC42-binding protein kinase alpha) (DMPK-like alpha) (Myotonic dystrophy kinase-related CDC42-binding kinase alpha) (MRCK alpha) (Myotonic dystrophy protein kinase-like alpha)	CDC42BPA KIAA0451	0.91099	1.00296		-0.108466		0.283861	1.00957	0.976412		-0.017342		0.129725	1
Q96CN9	GRIP and coiled-coil domain-containing protein 1 (Golgi coiled-coil protein 1)	GCC1	1.07082	3.0004	1.1467	1.36507		0.493069	0.799101	1.23921	0.726579	-0.201275		0.241688	1
Q96A49	Synapse-associated protein 1 (BSD domain-containing signal transducer and Akt interactor protein) (BSTA)	SYAP1 PRO3113	1.30424	2.31282	1.24848	1.19262		0.806817	1.22091	1.56366	1.05553	0.608894		0.74792	1
Q9BVK6	Transmembrane emp24 domain-containing protein 9 (GMP25) (Glycoprotein 25L2) (p24 family protein alpha-2) (p24alpha2) (p25)	TMED9 GP25L2		0.80834	0.782009	-0.56526	+	1.33832		0.974749	1.50191	0.527205		0.267624	1
O14744	Protein arginine N-methyltransferase 5 (PRMT5) (EC 2.1.1.320) (72 kDa ICln-binding protein) (Histone-arginine N-methyltransferase PRMT5) (Jak-binding protein 1) (Shk1 kinase-binding protein 1 homolog) (SKB1 homolog) (SKB1Hs) [Cleaved into: Protein arginine N-methyltransferase 5, N-terminally processed]	PRMT5 HRMT1L5 IBP72 JBP1 SKB1	0.902878	0.976339	0.857022	-0.226969		0.878155	1.14867	1.08099	1.42886	0.489427		0.816143	1
P08174	Complement decay-accelerating factor (CD antigen CD55)	CD55 CR DAF		0.951251	0.951165	-0.12337	+	3.24096		1.26567	1.54609	0.840178		0.734135	1
A7KAX9	Rho GTPase-activating protein 32 (Brain-specific Rho GTPase-activating protein) (GAB-associated Cdc42/Rac GTPase-activating protein) (GC-GAP) (GTPase regulator interacting with TrkA) (Rho-type GTPase-activating protein 32) (Rho/Cdc42/Rac GTPase-activating protein RICS) (RhoGAP involved in the beta-catenin-N-cadherin and NMDA receptor signaling) (p200RhoGAP) (p250GAP)	ARHGAP32 GRIT KIAA0712 RICS	0.943399	1.11521		0.0712396		0.0902256	1.11408	0.803584		-0.103676		0.101207	1
P61923	Coatomer subunit zeta-1 (Zeta-1-coat protein) (Zeta-1 COP)	COPZ1 COPZ CGI-120 HSPC181	1.64695	1.1047		0.786886		0.426437	0.889368	0.70699		-0.55596		0.533993	1
P04156	Major prion protein (PrP) (ASCR) (PrP27-30) (PrP33-35C) (CD antigen CD230)	PRNP ALTPRP PRIP PRP			1.20184	0.453431					1.64671	1.23014			1
P78504	Protein jagged-1 (Jagged1) (hJ1) (CD antigen CD339)	JAG1 JAGL1			0.861801	-0.366815					1.01501	0.0367456			1
Q15904	V-type proton ATPase subunit S1 (V-ATPase subunit S1) (Protein XAP-3) (V-ATPase Ac45 subunit) (V-ATPase S1 accessory protein) (Vacuolar proton pump subunit S1)	ATP6AP1 ATP6IP1 ATP6S1 VATPS1 XAP3	0.65459	0.900867	1.2441	-0.170548		0.198203	0.775436	0.939357	0.643504	-0.593572		0.833152	1
Q5VT97	Rho GTPase-activating protein SYDE2 (Synapse defective protein 1 homolog 2) (Protein syd-1 homolog 2)	SYDE2	0.900047		1.08721	-0.0157667		0.0328213	0.868067		0.920282	-0.275867		0.79048	1
P01033	Metalloproteinase inhibitor 1 (Erythroid-potentiating activity) (EPA) (Fibroblast collagenase inhibitor) (Collagenase inhibitor) (Tissue inhibitor of metalloproteinases 1) (TIMP-1)	TIMP1 CLGI TIMP	0.855383	1.00337	0.843508	-0.257788		0.715029	0.91817	0.810589	0.945258	-0.283699		0.883582	1
P51790	H(+)/Cl(-) exchange transporter 3 (Chloride channel protein 3) (ClC-3) (Chloride transporter ClC-3)	CLCN3	1.17663		1.62517	0.831433		0.531296	0.795641		0.996098	-0.271197		0.310591	1
O95159	Zinc finger protein-like 1 (Zinc finger protein MCG4)	ZFPL1	0.70993	0.921998	0.80549	-0.512184		0.976153	1.17878	0.932819	1.04065	0.122092		0.240559	1
Q8IUD2	ELKS/Rab6-interacting/CAST family member 1 (ERC-1) (Rab6-interacting protein 2)	ERC1 ELKS KIAA1081 RAB6IP2	0.580084	0.718188	0.835236	-0.840626		1.0987	1.03888	0.936893	1.17838	0.123586		0.250335	1
Q6ZV73	FYVE, RhoGEF and PH domain-containing protein 6 (Zinc finger FYVE domain-containing protein 24)	FGD6 KIAA1362 ZFYVE24	0.720815	0.51574	1.56944	-0.16488		0.19348	0.755678	0.637864	0.876076	-0.688101		1.05316	1
Q15084	Protein disulfide-isomerase A6 (EC 5.3.4.1) (Endoplasmic reticulum protein 5) (ER protein 5) (ERp5) (Protein disulfide isomerase P5) (Thioredoxin domain-containing protein 7)	PDIA6 ERP5 P5 TXNDC7	1.01901	1.01233	1.13877	0.136034		0.530206	1.121	1.03131	0.985532	0.110799		0.434119	1
Q9UJY4	ADP-ribosylation factor-binding protein GGA2 (Gamma-adaptin-related protein 2) (Golgi-localized, gamma ear-containing, ARF-binding protein 2) (VHS domain and ear domain of gamma-adaptin) (Vear)	GGA2 KIAA1080	1.17403		1.05766	0.270337		0.543647	0.886687		1.46247	0.396851		0.157972	1
Q6GMV3	Putative peptidyl-tRNA hydrolase PTRHD1 (EC 3.1.1.29) (Peptidyl-tRNA hydrolase domain-containing protein 1)	PTRHD1 C2orf79	1.09861		1.55102	0.693702		0.436961	1.16207		0.788115	-0.0622072		0.0663769	1
P19971	Thymidine phosphorylase (TP) (EC 2.4.2.4) (Gliostatin) (Platelet-derived endothelial cell growth factor) (PD-ECGF) (TdRPase)	TYMP ECGF1	2.11296		2.00443	1.78085	+	1.63364	0.860122		1.02969	-0.139763		0.206141	1
Q9Y5X1	Sorting nexin-9 (SH3 and PX domain-containing protein 1) (Protein SDP1) (SH3 and PX domain-containing protein 3A)	SNX9 SH3PX1 SH3PXD3A	1.11736	1.27353	1.40396	0.579667		1.13495	1.03929	1.10096	1.02532	0.132495		0.87018	1
Q6P179	Endoplasmic reticulum aminopeptidase 2 (EC 3.4.11.-) (Leukocyte-derived arginine aminopeptidase) (L-RAP)	ERAP2 LRAP	1.84201	0.96555	1.52477	0.90635		0.647867	0.936758	0.769815	1.1633	-0.10937		0.172673	1
Q9H4A6	Golgi phosphoprotein 3 (Coat protein GPP34) (Mitochondrial DNA absence factor) (MIDAS)	GOLPH3 GPP34			1.715	1.33036					1.0505	0.121496			1
Q9BVC4	Target of rapamycin complex subunit LST8 (TORC subunit LST8) (G protein beta subunit-like) (Gable) (Protein GbetaL) (Mammalian lethal with SEC13 protein 8) (mLST8)	MLST8 GBL LST8	0.975146	0.945392	1.14901	0.0565227		0.107244	0.812839	0.854752	0.744336	-0.538114	+	1.49223	1
Q14457	Beclin-1 (Coiled-coil myosin-like BCL2-interacting protein) (Protein GT197) [Cleaved into: Beclin-1-C 35 kDa; Beclin-1-C 37 kDa]	BECN1 GT197	0.71758	0.7348	0.977832	-0.519487		0.805438	0.803526	1.03369	1.01763	-0.122309		0.249787	1
O43402	ER membrane protein complex subunit 8 (Neighbor of COX4) (Protein FAM158B)	EMC8 C16orf2 C16orf4 COX4AL COX4NB FAM158B NOC4	0.76129	1.04924	1.30929	0.0965893		0.0300958	0.965287	0.858746	0.912384	-0.226808		0.957712	1
P06702	Protein S100-A9 (Calgranulin-B) (Calprotectin L1H subunit) (Leukocyte L1 complex heavy chain) (Migration inhibitory factor-related protein 14) (MRP-14) (p14) (S100 calcium-binding protein A9)	S100A9 CAGB CFAG MRP14	19.1906	6.95448	8.56044	6.03822	+	1.77062	0.724721	3.17946	0.651835	1.03051		0.0884405		1
O00622	CCN family member 1 (Cellular communication network factor 1) (Cysteine-rich angiogenic inducer 61) (Insulin-like growth factor-binding protein 10) (IBP-10) (IGF-binding protein 10) (IGFBP-10) (Protein CYR61) (Protein GIG1)	CCN1 CYR61 GIG1 IGFBP10	0.650444	0.763524	1.39439	-0.162803		0.186797	0.992311	0.92149	1.09643	0.0083995		0.0052766		1
P38571	Lysosomal acid lipase/cholesteryl ester hydrolase (Acid cholesteryl ester hydrolase) (LAL) (EC 3.1.1.13) (Cholesteryl esterase) (Lipase A) (Sterol esterase)	LIPA	1.29796	1.34537	1.12466	0.562146		1.26431	0.684564	0.910601	1.18578	-0.186995		0.228888		1
O95084	Serine protease 23 (EC 3.4.21.-) (Putative secreted protein Zsig13)	PRSS23 ZSIG13 UNQ270/PRO307	0.781904	1.06177	1.38978	0.184822		0.0963084	1.18057	0.99953	0.88261	0.0510221		0.0520754		1
P51688	N-sulphoglucosamine sulphohydrolase (EC 3.10.1.1) (Sulfoglucosamine sulfamidase) (Sulphamidase)	SGSH HSS	0.876093	0.846294	0.962371	-0.273813		1.00254	0.393951	0.561924	0.635359	-1.56389	+	1.34839		1
P04114	Apolipoprotein B-100 (Apo B-100) [Cleaved into: Apolipoprotein B-48 (Apo B-48)]	APOB	1.73884	1.32266	1.61298	1.09382	+	1.47954	0.873366	1.33843	1.29349	0.383903		0.376476		1
Q9UMR5	Lysosomal thioesterase PPT2 (PPT-2) (EC 3.1.2.-) (S-thioesterase G14)	PPT2	0.911707	0.974722	1.03782	-0.0630737		0.262986	0.410131	0.654186	0.710543	-1.29454		1.07575		1
Q03167	Transforming growth factor beta receptor type 3 (TGF-beta receptor type 3) (TGFR-3) (Betaglycan) (Transforming growth factor beta receptor III) (TGF-beta receptor type III)	TGFBR3	1.85373	1.56575	2.33123	1.60485	+	1.50546	0.788507	0.722736	0.838891	-0.602122	+	1.52993		1
P21709	Ephrin type-A receptor 1 (hEpha1) (EC 2.7.10.1) (EPH tyrosine kinase) (EPH tyrosine kinase 1) (Erythropoietin-producing hepatoma receptor) (Tyrosine-protein kinase receptor EPH)	EPHA1 EPH EPHT EPHT1	1.49535	1.36941	1.36948	0.849867	+	2.14286	0.898619	0.788376	0.870939	-0.39316		1.25822		1
Q6PCB0	von Willebrand factor A domain-containing protein 1	VWA1	2.69126	1.60516	2.31041	1.94713	+	1.42352	0.762467	0.719112	1.0984	-0.372		0.48115		1
O75144	ICOS ligand (B7 homolog 2) (B7-H2) (B7-like protein Gl50) (B7-related protein 1) (B7RP-1) (CD antigen CD275)	ICOSLG B7H2 B7RP1 ICOSL KIAA0653	1.50832		1.6405	1.1194		1.23019	1.19189		1.39471	0.63433		0.719181		1
P09758	Tumor-associated calcium signal transducer 2 (Cell surface glycoprotein Trop-2) (Membrane component chromosome 1 surface marker 1) (Pancreatic carcinoma marker protein GA733-1)	TACSTD2 GA733-1 M1S1 TROP2	1.36701	1.17705	1.52084	0.749205		1.2454	1.03486	1.35644	1.27634	0.495567		0.85043		1
Q9HB90	Ras-related GTP-binding protein C (Rag C) (RagC) (EC 3.6.5.-) (GTPase-interacting protein 2) (TIB929)	RRAGC	1.08206	1.21156	0.926137	0.174349		0.306645	0.516967	0.46058	0.809579	-1.27755		1.06648		1
P33151	Cadherin-5 (7B4 antigen) (Vascular endothelial cadherin) (VE-cadherin) (CD antigen CD144)	CDH5	1.26689		1.70725	0.978655		0.629111	0.567793		1.01249	-0.580914		0.289067		1
Q9GZM7	Tubulointerstitial nephritis antigen-like (Glucocorticoid-inducible protein 5) (Oxidized LDL-responsive gene 2 protein) (OLRG-2) (Tubulointerstitial nephritis antigen-related protein) (TIN Ag-related protein) (TIN-Ag-RP)	TINAGL1 GIS5 LCN7 OLRG2 TINAGL PP6614 PSEC0088 UNQ204/PRO230	2.93749	3.28181	4.44456	3.12788	+	2.01662	0.821104	0.660238	0.817476	-0.656574		1.19577		1
O94907	Dickkopf-related protein 1 (Dickkopf-1) (Dkk-1) (hDkk-1) (SK)	DKK1 UNQ492/PRO1008	0.65729	1.51573	1.13084	0.237946		0.052598	0.347973	0.60445	0.756374	-1.38809		0.930627		1
Q9UBX1	Cathepsin F (CATSF) (EC 3.4.22.41)	CTSF	1.78138	1.74874	1.88062	1.45456	+	2.864	0.749558	0.825495	0.778516	-0.598521	+	1.88498		1
P22223	Cadherin-3 (Placental cadherin) (P-cadherin)	CDH3 CDHP	1.08289	1.06381	1.22149	0.285513		0.921489	0.914163	1.17244	1.0302	0.0942023		0.160615		1
Q9NUP9	Protein lin-7 homolog C (Lin-7C) (Mammalian lin-seven protein 3) (MALS-3) (Vertebrate lin-7 homolog 3) (Veli-3)	LIN7C MALS3 VELI3	1.44301	1.59008	1.99436	1.27335	+	1.46909	1.26527	1.81601	1.02999	0.777183		0.647194		1
O75629	Protein CREG1 (Cellular repressor of E1A-stimulated genes 1)	CREG1 CREG UNQ727/PRO1409	0.788261	1.25825	1.04188	0.0716115		0.025421	0.987557	0.994818	0.893129	-0.104532		0.472492		1
P08582	Melanotransferrin (Melanoma-associated antigen p97) (CD antigen CD228)	MELTF MAP97 MFI2	1.14734	0.9721	1.04792	0.133887		0.407469	0.913874	1.15471	1.55923	0.468643		0.402998		1
Q14520	Hyaluronan-binding protein 2 (EC 3.4.21.-) (Factor VII-activating protease) (Factor seven-activating protease) (FSAP) (Hepatocyte growth factor activator-like protein) (Plasma hyaluronan-binding protein) [Cleaved into: Hyaluronan-binding protein 2 50 kDa heavy chain; Hyaluronan-binding protein 2 50 kDa heavy chain alternate form; Hyaluronan-binding protein 2 27 kDa light chain; Hyaluronan-binding…	HABP2 HGFAL PHBP	0.8512	1.40439	1.29394	0.414834		0.349292	0.742325	0.877507	0.894133	-0.435922		1.03169		1
Q14517	Protocadherin Fat 1 (Cadherin family member 7) (Cadherin-related tumor suppressor homolog) (Protein fat homolog) [Cleaved into: Protocadherin Fat 1, nuclear form]	FAT1 CDHF7 FAT	1.00546	1.00182	1.53635	0.410733		0.384115	0.815997	0.787489	0.843009	-0.503018	+	2.03896		1
Q01459	Di-N-acetylchitobiase (EC 3.2.1.-)	CTBS CTB	1.33592	1.17164		0.557786		0.741416	0.739676	0.633005		-0.92827		0.889863		1
Q92823	Neuronal cell adhesion molecule (Nr-CAM) (Neuronal surface protein Bravo) (hBravo) (NgCAM-related cell adhesion molecule) (Ng-CAM-related)	NRCAM KIAA0343	0.918945	0.552724		-0.756539		0.387381	1.15294	1.90073		1.04373		0.442286		1
O43291	Kunitz-type protease inhibitor 2 (Hepatocyte growth factor activator inhibitor type 2) (HAI-2) (Placental bikunin)	SPINT2 HAI2 KOP	1.46812	1.1683	1.02173	0.48918		0.659137	1.16768	1.4652	1.56616	0.829277		1.18043		1
P14543	Nidogen-1 (NID-1) (Entactin)	NID1 NID	1.47341	1.80871	2.70398	1.70379		1.17932	0.503837	0.464653	0.642854	-1.53292	+	1.63714		1
Q9H7M9	V-type immunoglobulin domain-containing suppressor of T-cell activation (Platelet receptor Gi24) (Stress-induced secreted protein-1) (Sisp-1) (V-set domain-containing immunoregulatory receptor) (V-set immunoregulatory receptor)	VSIR C10orf54 SISP1 VISTA PP2135 UNQ730/PRO1412	1.18464	1.34298	1.14725	0.500426		1.27647	1.62321	1.00338	1.09278	0.530107		0.489264		1
O14936	Peripheral plasma membrane protein CASK (hCASK) (EC 2.7.11.1) (Calcium/calmodulin-dependent serine protein kinase) (Protein lin-2 homolog)	CASK LIN2	1.39469	1.20927	1.47759	0.759284	+	1.44106	0.963771	0.933995	1.1315	0.02394		0.0327489		1
P02462	Collagen alpha-1(IV) chain [Cleaved into: Arresten]	COL4A1	2.62967	2.49399		2.32011	+	1.74653	0.708258	0.868784		-0.585984		0.59601		1
Q9Y2I1	Nischarin (Imidazoline receptor 1) (I-1) (IR1) (Imidazoline receptor antisera-selected protein) (hIRAS) (Imidazoline-1 receptor) (I1R) (Imidazoline-1 receptor candidate protein) (I-1 receptor candidate protein) (I1R candidate protein)	NISCH IRAS KIAA0975	1.05956	1.24944		0.354327		0.470849	0.773256	0.802586		-0.587862	+	1.3047		1
P07602	Prosaposin (Proactivator polypeptide) [Cleaved into: Saposin-A (Protein A); Saposin-B-Val; Saposin-B (Cerebroside sulfate activator) (CSAct) (Dispersin) (Sphingolipid activator protein 1) (SAP-1) (Sulfatide/GM1 activator); Saposin-C (A1 activator) (Co-beta-glucosidase) (Glucosylceramidase activator) (Sphingolipid activator protein 2) (SAP-2); Saposin-D (Component C) (Protein C)]	PSAP GLBA SAP1	1.23695	1.82996	1.61169	1.09599		1.18944	0.981056	1.26528	1.01127	0.203173		0.352082		1
P11117	Lysosomal acid phosphatase (LAP) (EC 3.1.3.2)	ACP2	0.824535	1.08203	0.857221	-0.202261		0.39506	0.452025	0.550795	0.624012	-1.50932	+	1.65529		1
P26006	Integrin alpha-3 (CD49 antigen-like family member C) (FRP-2) (Galactoprotein B3) (GAPB3) (VLA-3 subunit alpha) (CD antigen CD49c) [Cleaved into: Integrin alpha-3 heavy chain; Integrin alpha-3 light chain]	ITGA3 MSK18	1.31204	1.27037	1.4448	0.72623	+	1.77046	1.12549	1.1056	1.14143	0.288677	+	2.20996		1
Q8WTV0	Scavenger receptor class B member 1 (SRB1) (CD36 and LIMPII analogous 1) (CLA-1) (CD36 antigen-like 1) (Collagen type I receptor, thrombospondin receptor-like 1) (SR-BI) (CD antigen CD36)	SCARB1 CD36L1 CLA1	1.07694	1.03277	1.01944	0.103958		0.895725	1.06387	1.19876	1.45942	0.53189		0.813361		1
P06756	Integrin alpha-V (Vitronectin receptor) (Vitronectin receptor subunit alpha) (CD antigen CD51) [Cleaved into: Integrin alpha-V heavy chain; Integrin alpha-V light chain]	ITGAV MSK8 VNRA VTNR	1.47287	1.66524	2.07852	1.36446	+	1.48445	1.00007	0.975587	1.08592	0.0501035		0.212986		1
O14786	Neuropilin-1 (Vascular endothelial cell growth factor 165 receptor) (CD antigen CD304)	NRP1 NRP VEGF165R	1.04214	1.2405	1.39466	0.502056		0.835584	1.02465	0.910752	1.17586	0.0898148		0.14525		1
P01024	Complement C3 (C3 and PZP-like alpha-2-macroglobulin domain-containing protein 1) [Cleaved into: Complement C3 beta chain; C3-beta-c (C3bc); Complement C3 alpha chain; C3a anaphylatoxin; Acylation stimulating protein (ASP) (C3adesArg); Complement C3b alpha' chain; Complement C3c alpha' chain fragment 1; Complement C3dg fragment; Complement C3g fragment; Complement C3d fragment; Complement C3f fra…	C3 CPAMD1	1.51956	2.11562	2.09874	1.59764	+	1.5512	0.962972	0.859304	1.16974	-0.00657502		0.0385747		1
Q9UGK3	Signal-transducing adaptor protein 2 (STAP-2) (Breast tumor kinase substrate) (BRK substrate)	STAP2 BKS	5.50017			4.2045			1.18854			0.425998				1
Q08174	Protocadherin-1 (Cadherin-like protein 1) (Protocadherin-42) (PC42)	PCDH1	1.99096	1.79761	1.37606	1.33975	+	1.39404	1.07175	1.23971	1.44462	0.554338		0.893422		1
P51511	Matrix metalloproteinase-15 (MMP-15) (EC 3.4.24.-) (Membrane-type matrix metalloproteinase 2) (MT-MMP 2) (MTMMP2) (Membrane-type-2 matrix metalloproteinase) (MT2-MMP) (MT2MMP) (SMCP-2)	MMP15	0.979013	1.14049	1.26416	0.296809		0.581886	0.855944	1.24089	1.1998	0.232546		0.247269		1
Q13488	V-type proton ATPase 116 kDa subunit a 3 (V-ATPase 116 kDa subunit a 3) (Osteoclastic proton pump 116 kDa subunit) (OC-116 kDa) (OC116) (T-cell immune regulator 1) (T-cell immune response cDNA7 protein) (TIRC7) (Vacuolar proton translocating ATPase 116 kDa subunit a isoform 3)	TCIRG1 ATP6N1C ATP6V0A3	0.972592	1.0186	0.81336	-0.166147		0.393392	0.467951	0.442592	0.835106	-1.33547		0.990147		1
P54753	Ephrin type-B receptor 3 (EC 2.7.10.1) (EPH-like tyrosine kinase 2) (EPH-like kinase 2) (Embryonic kinase 2) (EK2) (hEK2) (Tyrosine-protein kinase TYRO6)	EPHB3 ETK2 HEK2 TYRO6	1.03959	0.76665	0.713975	-0.429797		0.611774	0.948291	0.71298	1.55417	0.171047		0.0228433		1
Q9Y653	Adhesion G-protein coupled receptor G1 (G-protein coupled receptor 56) (Protein TM7XN1) [Cleaved into: ADGRG1 N-terminal fragment (ADGRG1 NT) (GPR56 N-terminal fragment) (GPR56 NT) (GPR56(N)) (GPR56 extracellular subunit) (GPR56 subunit alpha); ADGRG1 C-terminal fragment (ADGRG1 CT) (GPR56 C-terminal fragment) (GPR56 CT) (GPR56(C)) (GPR56 seven-transmembrane subunit) (GPR56 7TM) (GPR56 subunit be…	ADGRG1 GPR56 TM7LN4 TM7XN1 UNQ540/PRO1083	0.819738	0.841467	1.01808	-0.278846		0.644723	1.15027	0.659313	0.90808	-0.243772		0.282863		1
Q9H5V8	CUB domain-containing protein 1 (Membrane glycoprotein gp140) (Subtractive immunization M plus HEp3-associated 135 kDa protein) (SIMA135) (Transmembrane and associated with src kinases) (CD antigen CD318)	CDCP1 TRASK UNQ2486/PRO5773	1.44229	1.48763	1.65109	1.044	+	2.03251	1.22348	1.12417	1.43575	0.572214		1.05979		1
Q969P0	Immunoglobulin superfamily member 8 (IgSF8) (CD81 partner 3) (Glu-Trp-Ile EWI motif-containing protein 2) (EWI-2) (Keratinocytes-associated transmembrane protein 4) (KCT-4) (LIR-D1) (Prostaglandin regulatory-like protein) (PGRL) (CD antigen CD316)	IGSF8 CD81P3 EWI2 KCT4	1.86974	1.43662	1.71161	1.2687	+	1.64955	1.12684	1.44094	1.20441	0.564887		1.03127		1
Q9Y5L3	Ectonucleoside triphosphate diphosphohydrolase 2 (NTPDase 2) (EC 3.6.1.-) (CD39 antigen-like 1) (Ecto-ATP diphosphohydrolase 2) (Ecto-ATPDase 2) (Ecto-ATPase 2)	ENTPD2 CD39L1	1.7987	1.57629		1.29048		1.0958	1.08132	1.18335		0.306515		0.651275		1
Q68DK2	Zinc finger FYVE domain-containing protein 26 (FYVE domain-containing centrosomal protein) (FYVE-CENT) (Spastizin)	ZFYVE26 KIAA0321	0.741372			-0.738047			0.517805			-1.62321				1
P05121	Plasminogen activator inhibitor 1 (PAI) (PAI-1) (Endothelial plasminogen activator inhibitor) (Serpin E1)	SERPINE1 PAI1 PLANH1	0.769263	0.782466	1.91865	0.359218		0.0514566	1.64389	1.8057	1.4297	1.19958	+	1.71562		1
Q13308	Inactive tyrosine-protein kinase 7 (Colon carcinoma kinase 4) (CCK-4) (Protein-tyrosine kinase 7) (Pseudo tyrosine kinase receptor 7) (Tyrosine-protein kinase-like 7)	PTK7 CCK4	0.963639	1.0047	1.11893	0.0707271		0.214814	0.974566	0.798536	1.19478	-0.026549		0.0684891		1
P60033	CD81 antigen (26 kDa cell surface protein TAPA-1) (Target of the antiproliferative antibody 1) (Tetraspanin-28) (Tspan-28) (CD antigen CD81)	CD81 TAPA1 TSPAN28	2.68867	1.22136		1.6534		0.42829	1.0634	1.41012		0.524078		0.411937		1
Q96NY8	Nectin-4 (Ig superfamily receptor LNIR) (Nectin cell adhesion molecule 4) (Poliovirus receptor-related protein 4) [Cleaved into: Processed poliovirus receptor-related protein 4]	NECTIN4 LNIR PRR4 PVRL4	0.997785	1.05345	1.2119	0.207362		0.525445	1.0002	0.800684	1.05556	-0.120937		0.239604		1
P04066	Tissue alpha-L-fucosidase (EC 3.2.1.51) (Alpha-L-fucosidase I) (Alpha-L-fucoside fucohydrolase 1) (Alpha-L-fucosidase 1)	FUCA1 Nbla10230	1.35298	1.57965	1.12027	0.741917		1.00232	0.539361	0.78455	0.802382	-0.848981		0.967749		1
P04626	Receptor tyrosine-protein kinase erbB-2 (EC 2.7.10.1) (Metastatic lymph node gene 19 protein) (MLN 19) (Proto-oncogene Neu) (Proto-oncogene c-ErbB-2) (Tyrosine kinase-type cell surface receptor HER2) (p185erbB2) (CD antigen CD340)	ERBB2 HER2 MLN19 NEU NGL	1.11014	0.792236	0.960567	-0.115333		0.205367	1.11155	0.834576	1.0751	0.0173835		0.00302875		1
Q9H3G5	Probable serine carboxypeptidase CPVL (EC 3.4.16.-) (Carboxypeptidase, vitellogenic-like) (Vitellogenic carboxypeptidase-like protein) (VCP-like protein) (hVLP)	CPVL VLP PSEC0124 UNQ197/PRO223	1.05117	1.18092	1.01638	0.196246		0.637515	0.697448	0.827153	0.902467	-0.52268		0.988461		1
P51798	H(+)/Cl(-) exchange transporter 7 (Chloride channel 7 alpha subunit) (Chloride channel protein 7) (ClC-7)	CLCN7	1.00776	1.36762	1.85332	0.846636		0.662566	0.583636	0.396413	0.649159	-1.50572		1.28489		1
O95297	Myelin protein zero-like protein 1 (Protein zero-related)	MPZL1 PZR UNQ849/PRO1787	1.40004		1.39775	0.827893	+	2.81009	0.950836		1.48484	0.486053		0.236009		1
Q8N1F8	Serine/threonine-protein kinase 11-interacting protein (LKB1-interacting protein 1)	STK11IP KIAA1898 LIP1 LKB1IP STK11IP1	0.848553	1.07194	0.610884	-0.418903		0.452585	0.510991	0.521788	0.716793	-1.32993	+	1.42929		1
O00754	Lysosomal alpha-mannosidase (Laman) (EC 3.2.1.24) (Lysosomal acid alpha-mannosidase) (Mannosidase alpha class 2B member 1) (Mannosidase alpha-B) [Cleaved into: Lysosomal alpha-mannosidase A peptide; Lysosomal alpha-mannosidase B peptide; Lysosomal alpha-mannosidase C peptide; Lysosomal alpha-mannosidase D peptide; Lysosomal alpha-mannosidase E peptide]	MAN2B1 LAMAN MANB	1.02393	1.2444	1.03052	0.234206		0.535227	0.581906	0.62834	0.801728	-0.985278		1.28816		1
Q15262	Receptor-type tyrosine-protein phosphatase kappa (Protein-tyrosine phosphatase kappa) (R-PTP-kappa) (EC 3.1.3.48)	PTPRK PTPK	1.16086	0.986931	1.0385	0.148579		0.455543	1.01377	1.01101	1.15152	0.140839		0.485383		1
P21589	5'-nucleotidase (5'-NT) (EC 3.1.3.35) (EC 3.1.3.5) (EC 3.1.3.89) (EC 3.1.3.91) (EC 3.1.3.99) (5'-deoxynucleotidase) (Ecto-5'-nucleotidase) (IMP-specific 5'-nucleotidase) (Thymidylate 5'-phosphatase) (CD antigen CD73)	NT5E NT5 NTE	0.794358	0.620232	0.830628	-0.714758		1.08733	0.914718	1.21185	1.35335	0.365997		0.436515		1
O43157	Plexin-B1 (Semaphorin receptor SEP)	PLXNB1 KIAA0407 PLXN5 SEP	0.928756	1.41789	1.60803	0.681409		0.567118	0.961611	0.72211	0.873637	-0.393714		0.729668		1
Q92783	Signal transducing adapter molecule 1 (STAM-1)	STAM STAM1	1.15466	1.05921	1.36856	0.437602		0.823652	0.938955	1.00339	1.03711	-0.0169503		0.0881086		1
P50895	Basal cell adhesion molecule (Auberger B antigen) (B-CAM cell surface glycoprotein) (F8/G253 antigen) (Lutheran antigen) (Lutheran blood group glycoprotein) (CD antigen CD239)	BCAM LU MSK19	1.12797	1.1403	1.17648	0.340939	+	2.08349	0.912395	0.838694	1.08469	-0.138839		0.302518		1
Q14344	Guanine nucleotide-binding protein subunit alpha-13 (G alpha-13) (G-protein subunit alpha-13)	GNA13	2.1142	1.61124	1.04601	1.14446		0.757828	0.832908	0.934454	1.50201	0.212069		0.0968452		1
Q9UBR2	Cathepsin Z (EC 3.4.18.1) (Cathepsin P) (Cathepsin X)	CTSZ	0.919279	0.928552	1.21849	0.0539326		0.0457151	0.944966	1.13368	0.962469	0.033574		0.0573523		1
P11047	Laminin subunit gamma-1 (Laminin B2 chain) (Laminin-1 subunit gamma) (Laminin-10 subunit gamma) (Laminin-11 subunit gamma) (Laminin-2 subunit gamma) (Laminin-3 subunit gamma) (Laminin-4 subunit gamma) (Laminin-6 subunit gamma) (Laminin-7 subunit gamma) (Laminin-8 subunit gamma) (Laminin-9 subunit gamma) (S-laminin subunit gamma) (S-LAM gamma)	LAMC1 LAMB2	1.21688	1.69594	1.68407	1.05254		1.20044	0.750559	0.548045	0.863125	-0.808217		0.906966		1
Q08345	Epithelial discoidin domain-containing receptor 1 (Epithelial discoidin domain receptor 1) (EC 2.7.10.1) (CD167 antigen-like family member A) (Cell adhesion kinase) (Discoidin receptor tyrosine kinase) (HGK2) (Mammary carcinoma kinase 10) (MCK-10) (Protein-tyrosine kinase 3A) (Protein-tyrosine kinase RTK-6) (TRK E) (Tyrosine kinase DDR) (Tyrosine-protein kinase CAK) (CD antigen CD167a)	DDR1 CAK EDDR1 NEP NTRK4 PTK3A RTK6 TRKE	1.35171		1.14827	0.550315		0.645543	1.03092		1.11549	0.174249		0.485434		1
P17813	Endoglin (CD antigen CD105)	ENG END	1.32568	1.01988	1.37607	0.531611		0.79784	0.822034	0.757312	1.02412	-0.349641		0.6238		1
O14964	Hepatocyte growth factor-regulated tyrosine kinase substrate (Hrs) (Protein pp110)	HGS HRS	1.08671	1.07829	1.31672	0.367267		0.802998	1.08028	1.29692	1.24681	0.466052		1.1034		1
P15151	Poliovirus receptor (Nectin-like protein 5) (NECL-5) (CD antigen CD155)	PVR PVS	1.318	1.29301	1.69125	0.889177		1.25844	1.03048	1.20834	1.45841	0.515388		0.730284		1
P05556	Integrin beta-1 (Fibronectin receptor subunit beta) (Glycoprotein IIa) (GPIIA) (VLA-4 subunit beta) (CD antigen CD29)	ITGB1 FNRB MDF2 MSK12	1.28561	1.21207	1.4366	0.668651	+	1.48511	0.997624	1.14094	1.16696	0.239187		0.714795		1
Q8TAA9	Vang-like protein 1 (Loop-tail protein 2 homolog) (LPP2) (Strabismus 2) (Van Gogh-like protein 1)	VANGL1 STB2	1.56668	1.1235	0.87197	0.423591		0.311071	1.02535	1.14027	1.78073	0.676209		0.544882		1
Q8N474	Secreted frizzled-related protein 1 (FRP-1) (sFRP-1) (Secreted apoptosis-related protein 2) (SARP-2)	SFRP1 FRP FRP1 SARP2	1.02524			0.0614674			1.22637			0.503271				1
O15031	Plexin-B2 (MM1)	PLXNB2 KIAA0315	0.992394	1.03593	1.20429	0.184178		0.457303	0.977026	0.92363	0.983391	-0.0972158		0.736389		1
Q9HAT2	Sialate O-acetylesterase (EC 3.1.1.53) (H-Lse) (Sialic acid-specific 9-O-acetylesterase)	SIAE YSG2	0.932779	1.13674	1.00014	0.0566066		0.114883	0.599289	1.02984	0.676069	-0.649733		0.661876		1
Q9H4M9	EH domain-containing protein 1 (PAST homolog 1) (hPAST1) (Testilin)	EHD1 PAST PAST1 CDABP0131	1.55723	1.19289	1.54606	0.885687		1.24493	0.841122	0.977828	1.24762	0.0541257		0.0235843		1
Q92692	Nectin-2 (Herpes virus entry mediator B) (Herpesvirus entry mediator B) (HveB) (Nectin cell adhesion molecule 2) (Poliovirus receptor-related protein 2) (CD antigen CD112)	NECTIN2 HVEB PRR2 PVRL2	1.15151	1.33618	1.47754	0.687976		1.19796	0.935322	1.22932	1.15962	0.253133		0.434382		1
P17050	Alpha-N-acetylgalactosaminidase (EC 3.2.1.49) (Alpha-galactosidase B)	NAGA	1.31645	0.958371	0.926707	0.16035		0.162958	0.70709	1.10592	1.22485	0.0309292		0.0269219		1
P43121	Cell surface glycoprotein MUC18 (Cell surface glycoprotein P1H12) (Melanoma cell adhesion molecule) (Melanoma-associated antigen A32) (Melanoma-associated antigen MUC18) (S-endo 1 endothelial-associated antigen) (CD antigen CD146)	MCAM MUC18	3.64714	2.40587	4.19208	3.02908	+	1.72751	1.00824	1.12269	1.05853	0.151034		0.716556		1
Q9Y6M4	Casein kinase I isoform gamma-3 (CKI-gamma 3) (EC 2.7.11.1)	CSNK1G3	1.70784		1.01893	0.76448		0.320841	1.0043		1.56362	0.616457		0.306376		1
Q9UGT4	Sushi domain-containing protein 2	SUSD2	1.7385	1.47532	1.42544	1.07516	+	1.70975	0.731713	1.04642	0.988307	-0.199896		0.309375		1
Q5R3F8	Protein phosphatase 1 regulatory subunit 29 (Extracellular leucine-rich repeat and fibronectin type III domain-containing protein 2) (Leucine-rich repeat and fibronectin type-III domain-containing protein 6) (Leucine-rich repeat-containing protein 62)	ELFN2 KIAA1904 LRRC62 PPP1R29	2.01696	1.53197		1.41442		0.817491	0.81427	0.6773		-0.72341		0.718797		1
Q6UWX4	HHIP-like protein 2	HHIPL2 HHIP3 KIAA1822L UNQ841/PRO1779	1.04974	1.20727	1.52588	0.571871		0.741059	0.725972	0.512664	0.653901	-1.13621	+	1.34989		1
O15230	Laminin subunit alpha-5 (Laminin-10 subunit alpha) (Laminin-11 subunit alpha) (Laminin-15 subunit alpha)	LAMA5 KIAA0533 KIAA1907	0.995977	1.43702	1.64973	0.759999		0.704368	0.715415	0.579614	0.900895	-0.769508		0.908956		1
Q13740	CD166 antigen (Activated leukocyte cell adhesion molecule) (CD antigen CD166)	ALCAM MEMD	0.864279	0.723066	0.949011	-0.414053		0.794039	1.15516	1.48716	1.14925	0.577525		0.933066		1
Q8IY95	Transmembrane protein 192	TMEM192	0.92349	0.899442	0.559276	-0.568691		0.589479	0.572703	0.512215	0.991389	-0.907653		0.741911		1
P15529	Membrane cofactor protein (TLX) (Trophoblast leukocyte common antigen) (CD antigen CD46)	CD46 MCP MIC10	1.15489	1.05828	1.23583	0.343974		1.0355	1.1425	1.33604	1.6064	0.761332		1.02905		1
Q13641	Trophoblast glycoprotein (5T4 oncofetal antigen) (5T4 oncofetal trophoblast glycoprotein) (5T4 oncotrophoblast glycoprotein) (M6P1) (Wnt-activated inhibitory factor 1) (WAIF1)	TPBG 5T4	1.28772	1.36859	1.42191	0.757274	+	2.05713	1.69464	1.92504	1.67675	1.4019	+	2.21611		1
Q96NE9	FERM domain-containing protein 6 (Willin)	FRMD6 C14orf31	0.647052			-1.07365			1.13802			0.318873				1
O75509	Tumor necrosis factor receptor superfamily member 21 (Death receptor 6) (CD antigen CD358)	TNFRSF21 DR6 UNQ437/PRO868	1.15211	0.942399	0.757718	-0.124576		0.190689	0.87808	0.866844	0.774594	-0.43048	+	1.32306		1
P08236	Beta-glucuronidase (EC 3.2.1.31) (Beta-G1)	GUSB	1.17108	1.43763	0.998128	0.454344		0.614407	0.603599	0.771991	0.908305	-0.672635		0.862376		1
Q08431	Lactadherin (Breast epithelial antigen BA46) (HMFG) (MFGM) (Milk fat globule-EGF factor 8) (MFG-E8) (SED1) [Cleaved into: Lactadherin short form; Medin]	MFGE8	0.965379	1.25019	1.54673	0.558412		0.574487	1.10192	1.10432	0.990062	0.156326		0.643791		1
Q8IWA5	Choline transporter-like protein 2 (Solute carrier family 44 member 2)	SLC44A2 CTL2 PSEC0210	1.08738	1.27788	0.826134	0.152531		0.123474	0.947447	0.717761	1.70164	0.284528		0.0624981		1
Q99538	Legumain (EC 3.4.22.34) (Asparaginyl endopeptidase) (Protease, cysteine 1)	LGMN PRSC1	0.724508	1.06796	1.61479	0.31395		0.108581	0.7636	0.703109	0.671071	-0.835692	+	1.91743		1
P48509	CD151 antigen (GP27) (Membrane glycoprotein SFA-1) (Platelet-endothelial tetraspan antigen 3) (PETA-3) (Tetraspanin-24) (Tspan-24) (CD antigen CD151)	CD151 TSPAN24	1.04474	0.910086	0.725917	-0.277509		0.438531	1.43603	1.02738	2.0919	1.03013		0.680073		1
P09668	Pro-cathepsin H [Cleaved into: Cathepsin H mini chain; Cathepsin H (EC 3.4.22.16); Cathepsin H heavy chain; Cathepsin H light chain]	CTSH CPSB	1.12173	1.5227	1.28027	0.662639		1.00692	0.852279	1.05966	0.952156	-0.114336		0.294494		1
O43278	Kunitz-type protease inhibitor 1 (Hepatocyte growth factor activator inhibitor type 1) (HAI-1)	SPINT1 HAI1 UNQ223/PRO256	1.23217	1.053	0.902989	0.150034		0.210504	0.995758	1.08662	1.16009	0.191683		0.640299		1
P42892	Endothelin-converting enzyme 1 (ECE-1) (EC 3.4.24.71)	ECE1	1.18346	0.953894	0.968897	0.0858391		0.149447	1.01733	0.920071	1.40791	0.268702		0.261223		1
O43504	Ragulator complex protein LAMTOR5 (Hepatitis B virus X-interacting protein) (HBV X-interacting protein) (HBX-interacting protein) (Late endosomal/lysosomal adaptor and MAPK and MTOR activator 5)	LAMTOR5 HBXIP XIP	1.32792	1.91405	1.43849	1.09697		1.22141	0.79399	0.947437	0.557038	-0.656952		0.68933		1
Q9UIW2	Plexin-A1 (Semaphorin receptor NOV)	PLXNA1 NOV PLXN1	1.18267	1.10907	1.16338	0.348353	+	1.73978	0.892723	0.727037	1.20378	-0.14951		0.200148		1
Q13444	Disintegrin and metalloproteinase domain-containing protein 15 (ADAM 15) (EC 3.4.24.-) (Metalloprotease RGD disintegrin protein) (Metalloproteinase-like, disintegrin-like, and cysteine-rich protein 15) (MDC-15) (Metargidin)	ADAM15 MDC15	1.3398	1.17763	1.07111	0.441795		0.941569	0.899281	0.976811	1.2735	0.120014		0.121624		1
P54709	Sodium/potassium-transporting ATPase subunit beta-3 (Sodium/potassium-dependent ATPase subunit beta-3) (ATPB-3) (CD antigen CD298)	ATP1B3	1.17358	0.852557	0.771152	-0.172545		0.247765	1.02226	1.49919	1.47289	0.706019		0.791371		1
O00115	Deoxyribonuclease-2-alpha (EC 3.1.22.1) (Acid DNase) (Deoxyribonuclease II alpha) (DNase II alpha) (Lysosomal DNase II) (R31240_2)	DNASE2 DNASE2A DNL2	1.22057	1.51386	1.48272	0.839891	+	1.4063	0.826434	1.01568	0.835579	-0.280308		0.658478		1
Q5ZPR3	CD276 antigen (4Ig-B7-H3) (B7 homolog 3) (B7-H3) (Costimulatory molecule) (CD antigen CD276)	CD276 B7H3 PSEC0249 UNQ309/PRO352	1.08702	1.88399		0.976058		0.380269	0.714106	1.11705		-0.217521		0.15354		1
P32004	Neural cell adhesion molecule L1 (N-CAM-L1) (NCAM-L1) (CD antigen CD171)	L1CAM CAML1 MIC5	0.92875	0.97061	0.995336	-0.0881262		0.665502	1.02753	0.885653	1.13635	0.0403888		0.0499193		1
P18065	Insulin-like growth factor-binding protein 2 (IBP-2) (IGF-binding protein 2) (IGFBP-2)	IGFBP2 BP2 IBP2	1.15718	1.74604	1.11333	0.719697		0.696013	1.00599	0.961583	0.857119	-0.148505		0.494306		1
P52799	Ephrin-B2 (EPH-related receptor tyrosine kinase ligand 5) (LERK-5) (HTK ligand) (HTK-L)	EFNB2 EPLG5 HTKL LERK5	1.87106	3.26701	2.48562	2.30019	+	1.52196	0.998529	0.994051	1.22851	0.17537		0.352845		1
P11279	Lysosome-associated membrane glycoprotein 1 (LAMP-1) (Lysosome-associated membrane protein 1) (CD107 antigen-like family member A) (CD antigen CD107a)	LAMP1	0.887474	1.03116	0.900685	-0.153203		0.50912	0.611174	0.574937	0.869798	-0.932002		1.03558		1
P06213	Insulin receptor (IR) (EC 2.7.10.1) (CD antigen CD220) [Cleaved into: Insulin receptor subunit alpha; Insulin receptor subunit beta]	INSR	1.57234	1.48386	2.18529	1.37618	+	1.33801	1.03936	0.864439	0.899192	-0.167523		0.47877		1
Q14126	Desmoglein-2 (Cadherin family member 5) (HDGC)	DSG2 CDHF5	1.44099	1.19766	1.07322	0.525133		0.855632	0.982977	1.06868	1.23025	0.221505		0.492642		1
Q7Z3T8	Zinc finger FYVE domain-containing protein 16 (Endofin) (Endosome-associated FYVE domain protein)	ZFYVE16 KIAA0305	1.10558	1.1834	0.987465	0.217392		0.607004	0.715495	0.800728	1.17772	-0.265386		0.321993		1
Q9Y2E5	Epididymis-specific alpha-mannosidase (EC 3.2.1.24) (Alpha-1,6-mannosidase) (Mannosidase alpha class 2B member 2)	MAN2B2 KIAA0935	1.25042	1.46782	1.08952	0.588036		0.937718	0.624123	0.683065	0.682792	-1.01239	+	2.27727		1
Q9NYQ6	Cadherin EGF LAG seven-pass G-type receptor 1 (Cadherin family member 9) (Flamingo homolog 2) (hFmi2)	CELSR1 CDHF9 FMI2	1.29587	1.12116		0.467104		0.628109	1.04398	0.731702	0.980782	-0.208807		0.325761		1
Q8WXA3	RUN and FYVE domain-containing protein 2 (Rab4-interacting protein related)	RUFY2 KIAA1537 RABIP4R	1.73546	1.42514	1.92874	1.30353	+	1.55618	0.830009	0.882465	1.14066	-0.123797		0.221087		1
Q9Y240	C-type lectin domain family 11 member A (C-type lectin superfamily member 3) (Lymphocyte secreted C-type lectin) (Osteolectin) (Stem cell growth factor) (p47)	CLEC11A CLECSF3 LSLCL SCGF	1.30952			0.665068			0.863776			-0.361171				1
P55210	Caspase-7 (CASP-7) (EC 3.4.22.60) (Apoptotic protease Mch-3) (CMH-1) (ICE-like apoptotic protease 3) (ICE-LAP3) [Cleaved into: Caspase-7 subunit p20; Caspase-7 subunit p11]	CASP7 MCH3	0.882862	1.2937		0.208647		0.104095	1.33609	0.713481		0.0603862		0.0215745		1
P98172	Ephrin-B1 (EFL-3) (ELK ligand) (ELK-L) (EPH-related receptor tyrosine kinase ligand 2) (LERK-2) [Cleaved into: Ephrin-B1 C-terminal fragment (Ephrin-B1 CTF); Ephrin-B1 intracellular domain (Ephrin-B1 ICD)]	EFNB1 EFL3 EPLG2 LERK2	1.58568	2.03739		1.46542		0.872713	1.0667	1.2353		0.346839		0.506939		1
P46939	Utrophin (Dystrophin-related protein 1) (DRP-1)	UTRN DMDL DRP1	0.847376	0.828011	0.977352	-0.303403		0.865989	0.9473	0.889026	1.04907	-0.0960669		0.31694		1
P13726	Tissue factor (TF) (Coagulation factor III) (Thromboplastin) (CD antigen CD142)	F3	1.82202	0.906787	1.042	0.563986		0.314066	2.07363	3.68413	1.49357	2.17669		1.03882		1
P48960	Adhesion G protein-coupled receptor E5 (Leukocyte antigen CD97) (CD antigen CD97) [Cleaved into: Adhesion G protein-coupled receptor E5 subunit alpha; Adhesion G protein-coupled receptor E5 subunit beta]	ADGRE5 CD97	1.06194	0.957035	1.26981	0.226668		0.385681	1.19695	1.482	1.16334	0.610303		1.05954		1
P07942	Laminin subunit beta-1 (Laminin B1 chain) (Laminin-1 subunit beta) (Laminin-10 subunit beta) (Laminin-12 subunit beta) (Laminin-2 subunit beta) (Laminin-6 subunit beta) (Laminin-8 subunit beta)	LAMB1	1	1.29765	1.4321	0.536986		0.713008	0.8286	0.625488	0.995207	-0.500196		0.612834		1
P07858	Cathepsin B (EC 3.4.22.1) (APP secretase) (APPS) (Cathepsin B1) [Cleaved into: Cathepsin B light chain; Cathepsin B heavy chain]	CTSB CPSB	0.934206	1.06808	1.08582	0.071389		0.19976	0.855875	0.740783	0.823825	-0.529381	+	1.42483		1
P09471	Guanine nucleotide-binding protein G(o) subunit alpha	GNAO1	2.98261			2.69518			0.873385			-0.333887				1
P08195	4F2 cell-surface antigen heavy chain (4F2hc) (4F2 heavy chain antigen) (Lymphocyte activation antigen 4F2 large subunit) (Solute carrier family 3 member 2) (CD antigen CD98)	SLC3A2 MDU1	1.05691	1.08785	1.08247	0.180065	+	1.8358	1.08093	1.32225	1.35797	0.557665		1.03724		1
P23229	Integrin alpha-6 (CD49 antigen-like family member F) (VLA-6) (CD antigen CD49f) [Cleaved into: Integrin alpha-6 heavy chain; Integrin alpha-6 light chain; Processed integrin alpha-6 (Alpha6p)]	ITGA6	1.3377	1.4925	1.46775	0.886699	+	2.05012	1.08248	1.03977	1.08222	0.162613	+	1.40899		1
Q9UBB9	Tuftelin-interacting protein 11 (Septin and tuftelin-interacting protein 1) (STIP-1)	TFIP11 STIP HSPC006	2.31195		1.0913	1.31105		0.362641	1.10266		1.31012	0.462755		0.554381		1
Q9UK41	Vacuolar protein sorting-associated protein 28 homolog (H-Vps28) (ESCRT-I complex subunit VPS28)	VPS28	1.68505	1.27114	1.27149	0.846046		1.15007	0.998036	1.66671	1.45932	0.784846		0.711598		1
P21283	V-type proton ATPase subunit C 1 (V-ATPase subunit C 1) (Vacuolar proton pump subunit C 1)	ATP6V1C1 ATP6C ATP6D VATC	1.44725			0.911712			0.717092			-0.820172				1
P35240	Merlin (Moesin-ezrin-radixin-like protein) (Neurofibromin-2) (Schwannomerlin) (Schwannomin)	NF2 SCH	1.53574		1.68903	1.17819		1.19836	0.916756		1.28179	0.233434		0.146066		1
P61421	V-type proton ATPase subunit d 1 (V-ATPase subunit d 1) (32 kDa accessory protein) (V-ATPase 40 kDa accessory protein) (V-ATPase AC39 subunit) (p39) (Vacuolar proton pump subunit d 1)	ATP6V0D1 ATP6D VPATPD	1.39458	1.11077	0.978943	0.369087		0.505737	0.59687	0.697269	0.852366	-0.825647		1.10376		1
Q8N697	Solute carrier family 15 member 4 (Peptide transporter 4) (Peptide/histidine transporter 1) (hPHT1)	SLC15A4 PHT1 PTR4 FP12591	0.945654		0.532661	-0.745427		0.35294	0.788724		1.1246	-0.109271		0.101003		1
Q8IY63	Angiomotin-like protein 1	AMOTL1	1.34669	1.02161	1.53565	0.649561		0.760527	1.02809	0.994768	0.8709	-0.0889244		0.278839		1
Q13510	Acid ceramidase (AC) (ACDase) (Acid CDase) (EC 3.5.1.23) (Acylsphingosine deacylase) (N-acylethanolamine hydrolase ASAH1) (EC 3.5.1.-) (N-acylsphingosine amidohydrolase) (Putative 32 kDa heart protein) (PHP32) [Cleaved into: Acid ceramidase subunit alpha; Acid ceramidase subunit beta]	ASAH1 ASAH HSD-33 HSD33	1.54805	1.3665	0.845324	0.556825		0.393919	0.775869	1.05624	2.00315	0.605784		0.211735		1
P08581	Hepatocyte growth factor receptor (HGF receptor) (EC 2.7.10.1) (HGF/SF receptor) (Proto-oncogene c-Met) (Scatter factor receptor) (SF receptor) (Tyrosine-protein kinase Met)	MET	0.829088	0.88754	1.1411	-0.119822		0.214932	1.0807	1.00813	1.22357	0.244315		0.633058		1
Q9H813	Proton-activated chloride channel (PAC) (hPAC) (Acid-sensitive outwardly-rectifying anion channel) (ASOR) (Proton-activated outwardly rectifying anion channel) (PAORAC) (Transmembrane protein 206) (hTMEM206)	PACC1 C1orf75 TMEM206	1.29831	1.19226	0.981039	0.360094		0.628698	0.966136	0.897978	1.67054	0.404479		0.227493		1
P17301	Integrin alpha-2 (CD49 antigen-like family member B) (Collagen receptor) (Platelet membrane glycoprotein Ia) (GPIa) (VLA-2 subunit alpha) (CD antigen CD49b)	ITGA2 CD49B	1.28045	1.24051	1.0033	0.397212		0.745554	1.0344	1.15722	1.40842	0.449687		0.71367		1
Q9Y624	Junctional adhesion molecule A (JAM-A) (Junctional adhesion molecule 1) (JAM-1) (Platelet F11 receptor) (Platelet adhesion molecule 1) (PAM-1) (CD antigen CD321)	F11R JAM1 JCAM UNQ264/PRO301	1.21287	1.0924	1.05532	0.279938		0.934725	1.14619	1.33373	1.26665	0.548086	+	1.41519		1
Q2M389	WASH complex subunit 4 (Strumpellin and WASH-interacting protein) (SWIP) (WASH complex subunit SWIP)	WASHC4 KIAA1033	1.07227	0.920057	0.58589	-0.373684		0.37687	0.801047	0.628667	1.29498	-0.2374		0.243134		1
P54760	Ephrin type-B receptor 4 (EC 2.7.10.1) (Hepatoma transmembrane kinase) (Tyrosine-protein kinase TYRO11)	EPHB4 HTK MYK1 TYRO11	1.21253	1.21179	0.923873	0.27082		0.423267	1.1514	1.29346	2.06427	1.005		0.767659		1
P16144	Integrin beta-4 (GP150) (CD antigen CD104)	ITGB4	1.47757	1.69641	1.57346	1.13202	+	2.12306	1.08417	1.00596	1.29822	0.300228		0.576218		1
Q9ULH0	Kinase D-interacting substrate of 220 kDa (Ankyrin repeat-rich membrane-spanning protein)	KIDINS220 ARMS KIAA1250	0.68311	0.67112	0.787283	-0.83139	+	1.66935	0.929495	0.70163	0.896623	-0.422438		0.744153		1
P78310	Coxsackievirus and adenovirus receptor (CAR) (hCAR) (CVB3-binding protein) (Coxsackievirus B-adenovirus receptor) (HCVADR)	CXADR CAR	1.84201	2.04804	1.71558	1.54183	+	2.1697	1.15333	1.20793	1.80108	0.807628		0.78903		1
Q7L9B9	Endonuclease/exonuclease/phosphatase family domain-containing protein 1	EEPD1 KIAA1706	1.72217	1.30637	2.22959	1.384		1.13387	1.08379	1.02831	1.27224	0.297305		0.676343		1
Q8NHP8	Putative phospholipase B-like 2 (EC 3.1.1.-) (76 kDa protein) (p76) (LAMA-like protein 2) (Lamina ancestor homolog 2) (Phospholipase B domain-containing protein 2) [Cleaved into: Putative phospholipase B-like 2 32 kDa form; Putative phospholipase B-like 2 45 kDa form]	PLBD2	1.24167	1.34308	1.61105	0.827383		1.29514	0.696644	1.03679	0.882647	-0.337724		0.490296		1
Q02487	Desmocollin-2 (Cadherin family member 2) (Desmocollin-3) (Desmosomal glycoprotein II) (Desmosomal glycoprotein III)	DSC2 CDHF2 DSC3	1.55281			1.08533			0.798864			-0.553845				1
Q9BZR6	Reticulon-4 receptor (Nogo receptor) (NgR) (Nogo-66 receptor)	RTN4R NOGOR UNQ330/PRO526	1.21585	1.13574	1.2289	0.436266	+	1.71989	0.898474	0.853318	1.2377	-0.00865762		0.0484897		1
Q6UXD5	Seizure 6-like protein 2	SEZ6L2 PSK UNQ1903/PRO4349	1.41393		1.27315	0.728326		0.949261	0.877583		1.05372	-0.0862068		0.129234		1
Q86WC4	Osteopetrosis-associated transmembrane protein 1 (Chloride channel 7 beta subunit)	OSTM1 GL HSPC019 UNQ6098/PRO21201	1.19165	1.41456	1.40526	0.71657	+	1.4433	0.770424	0.736662	0.858449	-0.586014	+	1.4676		1
Q8TAG9	Exocyst complex component 6 (Exocyst complex component Sec15A) (SEC15-like protein 1)	EXOC6 SEC15A SEC15L SEC15L1	1.34016	1.04282		0.432112		0.387806	0.995845	1.07266		0.0830674		0.269424		1
P36897	TGF-beta receptor type-1 (TGFR-1) (EC 2.7.11.30) (Activin A receptor type II-like protein kinase of 53kD) (Activin receptor-like kinase 5) (ALK-5) (ALK5) (Serine/threonine-protein kinase receptor R4) (SKR4) (TGF-beta type I receptor) (Transforming growth factor-beta receptor type I) (TGF-beta receptor type I) (TbetaR-I)	TGFBR1 ALK5 SKR4	0.631486			-1.13371			1.54312			1.06989				1
P04899	Guanine nucleotide-binding protein G(i) subunit alpha-2 (Adenylate cyclase-inhibiting G alpha protein)	GNAI2 GNAI2B	1.25544	1.12009	0.872306	0.195771		0.228199	1.03382	1.14937	1.33651	0.39402		0.758448		1
Q9HCE7	E3 ubiquitin-protein ligase SMURF1 (hSMURF1) (EC 2.3.2.26) (HECT-type E3 ubiquitin transferase SMURF1) (SMAD ubiquitination regulatory factor 1) (SMAD-specific E3 ubiquitin-protein ligase 1)	SMURF1 KIAA1625	1.28101			0.610785			0.999994			-1.58071e-05				1
P10253	Lysosomal alpha-glucosidase (EC 3.2.1.20) (Acid maltase) (Aglucosidase alfa) [Cleaved into: 76 kDa lysosomal alpha-glucosidase; 70 kDa lysosomal alpha-glucosidase]	GAA	1.18882	1.12317	1.0303	0.266463		0.902942	0.773688	1.02447	0.97204	-0.196552		0.377456		1
P78325	Disintegrin and metalloproteinase domain-containing protein 8 (ADAM 8) (EC 3.4.24.-) (Cell surface antigen MS2) (CD antigen CD156a)	ADAM8 MS2	1.31263			0.670913			1.05616			0.134757				1
Q9UJA9	Ectonucleotide pyrophosphatase/phosphodiesterase family member 5 (E-NPP 5) (NPP-5) (EC 3.1.-.-)	ENPP5 UNQ550/PRO1107	1.13845			0.319801			1.20048			0.450643				1
Q6EMK4	Vasorin (Protein slit-like 2)	VASN SLITL2 UNQ314/PRO357/PRO1282	0.955217		0.836057	-0.271836		0.467852	0.815795		0.821805	-0.493052	+	1.9324		1
O00560	Syntenin-1 (Melanoma differentiation-associated protein 9) (MDA-9) (Pro-TGF-alpha cytoplasmic domain-interacting protein 18) (TACIP18) (Scaffold protein Pbp1) (Syndecan-binding protein 1)	SDCBP MDA9 SYCL	1.73829	2.06596	2.44395	1.80948	+	1.74573	0.953234	1.32543	1.02299	0.236301		0.315791		1
Q96S15	GATOR complex protein WDR24 (WD repeat-containing protein 24)	WDR24 C16orf21 JFP7	0.848079	0.866173	0.900361	-0.339107	+	1.802	0.569956	0.606124	0.66097	-1.2096	+	2.12304		1
Q9ULL4	Plexin-B3	PLXNB3 KIAA1206 PLXN6	1.34667			0.73406			0.747803			-0.716745				1
P10619	Lysosomal protective protein (EC 3.4.16.5) (Carboxypeptidase C) (Carboxypeptidase L) (Cathepsin A) (Protective protein cathepsin A) (PPCA) (Protective protein for beta-galactosidase) [Cleaved into: Lysosomal protective protein 32 kDa chain; Lysosomal protective protein 20 kDa chain]	CTSA PPGB	1.00307	0.946819	0.920124	-0.109248		0.66025	1.20945	1.51387	0.944736	0.49585		0.506116		1
Q9NZV1	Cysteine-rich motor neuron 1 protein (CRIM-1) (Cysteine-rich repeat-containing protein S52) [Cleaved into: Processed cysteine-rich motor neuron 1 protein]	CRIM1 S52 UNQ1886/PRO4330	0.837739	0.919094	0.799492	-0.394711		1.23224	0.812789	0.762242	1.16168	-0.226547		0.309007		1
P60468	Protein transport protein Sec61 subunit beta	SEC61B	0.94368	0.967013	0.907646	-0.154056		1.11624	1.16703	1.33515	1.12969	0.471398		1.1779		1
Q14254	Flotillin-2 (Epidermal surface antigen) (ESA) (Membrane component chromosome 17 surface marker 1)	FLOT2 ESA1 M17S1	0.993225	0.971793	0.57355	-0.411902		0.412591	0.880162	1.25522	1.43948	0.432383		0.395727		1
Q92574	Hamartin (Tuberous sclerosis 1 protein)	TSC1 KIAA0243 TSC	1.07595	1.26281	1.1716	0.387478		1.10393	0.537725	0.467557	0.642925	-1.47713	+	1.65251		1
P05362	Intercellular adhesion molecule 1 (ICAM-1) (Major group rhinovirus receptor) (CD antigen CD54)	ICAM1	2.06259	1.60057	2.46851	1.76305	+	1.51128	1.28275	1.62295	1.2876	0.825906		1.28642		1
Q9BZF1	Oxysterol-binding protein-related protein 8 (ORP-8) (OSBP-related protein 8)	OSBPL8 KIAA1451 ORP8 OSBP10	0.630771			-1.13651			0.919156			-0.207908				1
Q8N5I2	Arrestin domain-containing protein 1 (Alpha-arrestin 1)	ARRDC1	1.08418	0.858572	1.09592	0.0315871		0.0263629	1.09393	1.04194	0.967337	0.0834208		0.338418		1
Q03154	Aminoacylase-1 (ACY-1) (EC 3.5.1.14) (N-acyl-L-amino-acid amidohydrolase)	ACY1	2.68355	5.01971	1.10542	2.65652		0.752622	0.927494	1.0839	0.858758	-0.109129		0.260725		1
P21860	Receptor tyrosine-protein kinase erbB-3 (EC 2.7.10.1) (Proto-oncogene-like protein c-ErbB-3) (Tyrosine kinase-type cell surface receptor HER3)	ERBB3 HER3	0.565633	0.606088	0.693061	-1.17265	+	1.81961	1.01221	0.758271	0.905142	-0.282221		0.544254		1
O60493	Sorting nexin-3 (Protein SDP3)	SNX3	0.980052	1.06428	1.68044	0.533691		0.419446	0.928617	0.985513	1.17278	0.0704356		0.114386		1
Q15172	Serine/threonine-protein phosphatase 2A 56 kDa regulatory subunit alpha isoform (PP2A B subunit isoform B'-alpha) (PP2A B subunit isoform B56-alpha) (PP2A B subunit isoform PR61-alpha) (PR61alpha) (PP2A B subunit isoform R5-alpha)	PPP2R5A	1.06795			0.162141			0.685544			-0.931135				1
Q9HCM4	Band 4.1-like protein 5 (Erythrocyte membrane protein band 4.1-like 5)	EPB41L5 KIAA1548	0.789874	0.701145	0.961043	-0.497411		0.825414	1.06753	0.738794	0.808023	-0.339355		0.511259		1
Q8NFJ5	Retinoic acid-induced protein 3 (G-protein coupled receptor family C group 5 member A) (Phorbol ester induced gene 1) (PEIG-1) (Retinoic acid-induced gene 1 protein) (RAIG-1)	GPRC5A GPCR5A RAI3 RAIG1	0.993798	0.79456	0.655457	-0.50572		0.678884	0.908521	0.717982	1.09836	-0.237247		0.335878		1
P22304	Iduronate 2-sulfatase (EC 3.1.6.13) (Alpha-L-iduronate sulfate sulfatase) (Idursulfase) [Cleaved into: Iduronate 2-sulfatase 42 kDa chain; Iduronate 2-sulfatase 14 kDa chain]	IDS SIDS	1.47979	1.42645	1.27923	0.821296	+	1.76955	0.730602	0.746614	0.725275	-0.762145	+	3.10102		1
Q9UHN6	Cell surface hyaluronidase (EC 3.2.1.35) (Cell migration-inducing hyaluronidase 2) (Transmembrane protein 2)	CEMIP2 KIAA1412 TMEM2	1.01402	1.03872	0.896323	-0.0422384		0.145523	0.96387	0.912529	1.0894	-0.0282775		0.0908436		1
Q6IA17	Single Ig IL-1-related receptor (Single Ig IL-1R-related molecule) (Single immunoglobulin domain-containing IL1R-related protein) (Toll/interleukin-1 receptor 8) (TIR8)	SIGIRR UNQ301/PRO342	1.13757	0.914012	0.907584	-0.033804		0.0868797	0.886229	0.858171	1.33515	0.0645448		0.0111546		1
P24941	Cyclin-dependent kinase 2 (EC 2.7.11.22) (Cell division protein kinase 2) (p33 protein kinase)	CDK2 CDKN2	2.07647	1.45914	1.02909	1.03521		0.693961	0.807216	1.09233	1.11097	0.00863392		0.0208037		1
Q03405	Urokinase plasminogen activator surface receptor (U-PAR) (uPAR) (Monocyte activation antigen Mo3) (CD antigen CD87)	PLAUR MO3 UPAR	1.08637	1.25302	1.15882	0.378926		1.17735	0.975576	0.947207	1.44493	0.285155		0.257785		1
Q6YHK3	CD109 antigen (150 kDa TGF-beta-1-binding protein) (C3 and PZP-like alpha-2-macroglobulin domain-containing protein 7) (Platelet-specific Gov antigen) (p180) (r150) (CD antigen CD109)	CD109 CPAMD7	1.18402	1.09906	1.08741	0.287197	+	1.30473	0.979981	0.976399	1.17013	0.101867		0.227142		1
Q9H3N1	Thioredoxin-related transmembrane protein 1 (Thioredoxin domain-containing protein 1) (Transmembrane Trx-related protein)	TMX1 TMX TXNDC TXNDC1 PSEC0085 UNQ235/PRO268	0.981762	0.750291	0.52689	-0.699728		0.653438	1.24845	1.00594	1.44711	0.518237		0.699045		1
P25942	Tumor necrosis factor receptor superfamily member 5 (B-cell surface antigen CD40) (Bp50) (CD40L receptor) (CDw40) (CD antigen CD40)	CD40 TNFRSF5	1.42342	0.450244		-0.160933		0.116231	1.0283	1.37026		0.448177		0.35286		1
A6NGU5	Putative glutathione hydrolase 3 proenzyme (EC 3.4.19.13) (Gamma-glutamyltransferase 3) (Putative gamma-glutamyltranspeptidase 3) (GGT 3) (EC 2.3.2.2) [Cleaved into: Putative glutathione hydrolase 3 heavy chain; Putative glutathione hydrolase 3 light chain]	GGT3P GGT3	4.3282	5.82907		4.00785		1.23249	1.1431	1.3082		0.501819		0.686246		1
P20933	N(4)-(beta-N-acetylglucosaminyl)-L-asparaginase (EC 3.5.1.26) (Aspartylglucosaminidase) (Glycosylasparaginase) (N4-(N-acetyl-beta-glucosaminyl)-L-asparagine amidase) [Cleaved into: Glycosylasparaginase alpha chain; Glycosylasparaginase beta chain]	AGA	0.831397	0.796388	0.796221	-0.525793	+	2.3461	0.759013	0.883819	0.809215	-0.497426	+	1.35762		1
Q9H3Q1	Cdc42 effector protein 4 (Binder of Rho GTPases 4)	CDC42EP4 BORG4 CEP4	1.72378	1.57169	1.78127	1.29741	+	2.2956	0.965249	1.34184	1.03164	0.26384		0.358415		1
Q8IWT6	Volume-regulated anion channel subunit LRRC8A (Leucine-rich repeat-containing protein 8A) (HsLRRC8A) (Swelling protein 1)	LRRC8A KIAA1437 LRRC8 SWELL1 UNQ221/PRO247	1.35746	1.48016		0.862758		1.10487	0.967357	0.885312		-0.18872		0.480607		1
P18084	Integrin beta-5	ITGB5	1.51925	1.25602	1.58337	0.921284	+	1.45025	1.16364	1.3872	1.22248	0.565628	+	1.30606		1
Q96L92	Sorting nexin-27	SNX27 KIAA0488 My014	1.13711	0.985563	0.972731	0.0772101		0.205374	0.793816	1.05766	1.49997	0.273214		0.144665		1
Q9UI26	Importin-11 (Imp11) (Ran-binding protein 11) (RanBP11)	IPO11 RANBP11	1.40723		0.757573	0.195285		0.0294432	0.913855		1.38656	0.345141		0.173135		1
Q92796	Disks large homolog 3 (Neuroendocrine-DLG) (Synapse-associated protein 102) (SAP-102) (SAP102) (XLMR)	DLG3 KIAA1232	1.08405	1.13659	1.21627	0.335316		1.25009	1.1831	1.13491	1.04596	0.282423		1.05174		1
Q13613	Myotubularin-related protein 1 (Phosphatidylinositol-3,5-bisphosphate 3-phosphatase) (EC 3.1.3.95) (Phosphatidylinositol-3-phosphate phosphatase) (EC 3.1.3.64)	MTMR1	1.42653	1.53897	1.12275	0.763339		1.0604	1.02529	0.812106	1.17106	0.00694163		0.0248104		1
O60245	Protocadherin-7 (Brain-heart protocadherin) (BH-Pcdh)	PCDH7 BHPCDH	0.855228	0.795619	0.855126	-0.443775	+	1.7617	1.06887	0.96455	1.17569	0.166185		0.421914		1
Q9NXC5	GATOR complex protein MIOS (Missing oocyte meiosis regulator homolog)	MIOS	1.21655	1.10476	0.930022	0.198419		0.352909	0.640501	0.868938	0.915753	-0.524586		0.741424		1
P05026	Sodium/potassium-transporting ATPase subunit beta-1 (Sodium/potassium-dependent ATPase subunit beta-1)	ATP1B1 ATP1B	1.20482	0.95326	0.887703	0.0373503		0.0219792	1.41866	1.85273	1.39026	1.08704	+	1.36696		1
Q5XXA6	Anoctamin-1 (Discovered on gastrointestinal stromal tumors protein 1) (Oral cancer overexpressed protein 2) (Transmembrane protein 16A) (Tumor-amplified and overexpressed sequence 2)	ANO1 DOG1 ORAOV2 TAOS2 TMEM16A	1.54329	1.51111	1.41335	0.982258	+	2.35475	0.976223	0.831656	1.29474	0.0829512		0.0412165		1
Q6Y1H2	Very-long-chain (3R)-3-hydroxyacyl-CoA dehydratase 2 (EC 4.2.1.134) (3-hydroxyacyl-CoA dehydratase 2) (HACD2) (Protein-tyrosine phosphatase-like member B)	HACD2 PTPLB	1.17072	0.675047	0.476364	-0.631682		0.469166	1.1436	0.678318	0.990131	-0.159571		0.201258		1
Q92820	Gamma-glutamyl hydrolase (EC 3.4.19.9) (Conjugase) (GH) (Gamma-Glu-X carboxypeptidase)	GGH	1.08947	1.21398	1.29436	0.448153		1.1517	0.823075	1.32465	0.919185	0.0544037		0.00155031		1
Q15014	Mortality factor 4-like protein 2 (MORF-related gene X protein) (Protein MSL3-2) (Transcription factor-like protein MRGX)	MORF4L2 KIAA0026 MRGX	2.11535			1.84781			0.941342			-0.149084				1
O95274	Ly6/PLAUR domain-containing protein 3 (GPI-anchored metastasis-associated protein C4.4A homolog) (Matrigel-induced gene C4 protein) (MIG-C4)	LYPD3 C4.4A UNQ491/PRO1007	1.96451		1.32239	1.22525		0.601709	0.85959		1.71008	0.618129		0.170711		1
O94868	F-BAR and double SH3 domains protein 2 (Carom) (Protein nervous wreck 1) (NWK1) (SH3 multiple domains protein 3)	FCHSD2 KIAA0769 SH3MD3	1.00391			0.00961608			0.782274			-0.6056				1
P16422	Epithelial cell adhesion molecule (Ep-CAM) (Adenocarcinoma-associated antigen) (Cell surface glycoprotein Trop-1) (Epithelial cell surface antigen) (Epithelial glycoprotein) (EGP) (Epithelial glycoprotein 314) (EGP314) (hEGP314) (KS 1/4 antigen) (KSA) (Major gastrointestinal tumor-associated protein GA733-2) (Tumor-associated calcium signal transducer 1) (CD antigen CD326)	EPCAM GA733-2 M1S2 M4S1 MIC18 TACSTD1 TROP1	1.28191	0.942202	1.00572	0.182055		0.25153	1.11402	1.17327	1.09619	0.296679	+	1.5525		1
O94832	Unconventional myosin-Id	MYO1D KIAA0727	1.16007	1.12051	1.07178	0.273895	+	1.39388	0.970056	0.718412	1.03046	-0.242625		0.369865		1
P49137	MAP kinase-activated protein kinase 2 (MAPK-activated protein kinase 2) (MAPKAP kinase 2) (MAPKAP-K2) (MAPKAPK-2) (MK-2) (MK2) (EC 2.7.11.1)	MAPKAPK2	0.94365	1.53831	0.808902	0.228221		0.092457	1.12269	1.17919	0.997116	0.234313		0.690182		1
Q9Y320	Thioredoxin-related transmembrane protein 2 (Cell proliferation-inducing gene 26 protein) (Thioredoxin domain-containing protein 14)	TMX2 TXNDC14 CGI-31 My009 PIG26 PSEC0045 UNQ237/PRO270	1.14714	1.10675	0.495716	-0.214949		0.200779	1.15405	0.674623	1.15982	-0.00948406		0.0617906		1
Q9H3S7	Tyrosine-protein phosphatase non-receptor type 23 (EC 3.1.3.48) (His domain-containing protein tyrosine phosphatase) (HD-PTP) (Protein tyrosine phosphatase TD14) (PTP-TD14)	PTPN23 KIAA1471	0.944486	0.964805	1.05707	-0.0278104		0.123517	0.913187	0.947109	1.10272	-0.0305952		0.0914301		1
O95208	Epsin-2 (EPS-15-interacting protein 2)	EPN2 KIAA1065	1.13196	0.866197	1.4417	0.337437		0.288136	1.18907	1.32904	1.02095	0.407552		0.763749		1
P42785	Lysosomal Pro-X carboxypeptidase (EC 3.4.16.2) (Angiotensinase C) (Lysosomal carboxypeptidase C) (Proline carboxypeptidase) (Prolylcarboxypeptidase) (PRCP)	PRCP PCP	1.14593	1.34396	0.765483	0.201479		0.11105	0.666811	0.807928	1.07481	-0.401255		0.495467		1
Q9Y4K0	Lysyl oxidase homolog 2 (EC 1.4.3.13) (Lysyl oxidase-like protein 2) (Lysyl oxidase-related protein 2) (Lysyl oxidase-related protein WS9-14)	LOXL2	0.937967	1.24799	2.16353	0.916099		0.476351	2.06818	1.19476	1.0952	0.920998		0.624647		1
Q9Y4F1	FERM, ARHGEF and pleckstrin domain-containing protein 1 (Chondrocyte-derived ezrin-like protein) (FERM, RhoGEF and pleckstrin domain-containing protein 1) (Pleckstrin homology domain-containing family C member 2) (PH domain-containing family C member 2)	FARP1 CDEP PLEKHC2	1.29037	1.19888	1.49406	0.699204	+	1.30365	0.959457	0.933322	0.8914	-0.184132		1.13786		1
Q9H8S9	MOB kinase activator 1A (Mob1 alpha) (Mob1A) (Mob1 homolog 1B) (Mps one binder kinase activator-like 1B)	MOB1A C2orf6 MOB4B MOBK1B MOBKL1B	1.66536	1.42681	1.23426	0.902992		1.2714	1.25713	1.1281	1.53553	0.660163		0.987822		1
Q8NCG7	Diacylglycerol lipase-beta (DAGL-beta) (DGL-beta) (EC 3.1.1.116) (KCCR13L) (PUFA-specific triacylglycerol lipase) (EC 3.1.1.3) (Sn1-specific diacylglycerol lipase beta)	DAGLB	1.57723	1.07565		0.696735		0.399061	0.863999	0.556811		-0.843278		0.463132		1
Q9UIQ6	Leucyl-cystinyl aminopeptidase (Cystinyl aminopeptidase) (EC 3.4.11.3) (Insulin-regulated membrane aminopeptidase) (Insulin-responsive aminopeptidase) (IRAP) (Oxytocinase) (OTase) (Placental leucine aminopeptidase) (P-LAP) [Cleaved into: Leucyl-cystinyl aminopeptidase, pregnancy serum form]	LNPEP OTASE	0.853655	0.73672	0.926536	-0.433033		0.938236	0.952717	1.12518	1.25762	0.26146		0.465386		1
Q15758	Neutral amino acid transporter B(0) (ATB(0)) (Baboon M7 virus receptor) (RD114/simian type D retrovirus receptor) (Sodium-dependent neutral amino acid transporter type 2) (Solute carrier family 1 member 5)	SLC1A5 ASCT2 M7V1 RDR RDRC	0.938056	0.939368	0.588458	-0.483551		0.530352	1.05744	0.969437	1.57814	0.453096		0.401062		1
Q8NBS3	Solute carrier family 4 member 11 (Sodium borate cotransporter 1) (NaBC1)	SLC4A11 BTR1	0.354561			-2.55725			0.950494			-0.125222				1
P19256	Lymphocyte function-associated antigen 3 (Ag3) (Surface glycoprotein LFA-3) (CD antigen CD58)	CD58 LFA3	1.44142			0.901746			1.48456			0.974487				1
O60749	Sorting nexin-2 (Transformation-related gene 9 protein) (TRG-9)	SNX2 TRG9	1.31133	1.0654	1.36191	0.54285		0.971477	0.953315	0.953125	1.21165	0.0952167		0.138288		1
Q4KMQ2	Anoctamin-6 (Small-conductance calcium-activated nonselective cation channel) (SCAN channel) (Transmembrane protein 16F)	ANO6 TMEM16F	0.778665	1.02179	0.754603	-0.395938		0.659089	1.24337	0.781156	1.17697	0.16032		0.102496		1
Q9Y5X2	Sorting nexin-8	SNX8	1.47123	1.21627	1.31023	0.708105	+	1.44408	0.994569	1.08389	1.25259	0.258163		0.560248		1
Q9H269	Vacuolar protein sorting-associated protein 16 homolog (hVPS16)	VPS16	1.10163	0.991995	0.879024	-0.0225879		0.0673918	0.697064	0.65545	0.946777	-0.656065		0.874949		1
Q96JC1	Vam6/Vps39-like protein (TRAP1-like protein) (hVam6p)	VPS39 KIAA0770 TLP VAM6	1.15944	0.878574	0.905603	-0.0467948		0.103225	0.722638	0.67086	1.03324	-0.52302		0.645869		1
Q08380	Galectin-3-binding protein (Basement membrane autoantigen p105) (Lectin galactoside-binding soluble 3-binding protein) (Mac-2-binding protein) (MAC2BP) (Mac-2 BP) (Tumor-associated antigen 90K)	LGALS3BP M2BP	1.1689	1.0963	0.917358	0.145689		0.272029	0.862265	0.972077	1.09358	-0.0599823		0.146648		1
Q9UBB4	Ataxin-10 (Brain protein E46 homolog) (Spinocerebellar ataxia type 10 protein)	ATXN10 SCA10	1.21985	1.25016	0.762676	0.184233		0.105803	0.902775	0.820511	1.57575	0.234345		0.0842353		1
Q9C0C4	Semaphorin-4C	SEMA4C KIAA1739 SEMAI UNQ5855/PRO34487	1.13857			0.320062			0.910655			-0.230824				1
Q96DM3	Regulator of MON1-CCZ1 complex (Colon cancer-associated protein Mic1) (Mic-1) (WD repeat-containing protein 98)	RMC1 C18orf8 MIC1 WDR98	1.49066	1.43515	1.03238	0.683596		0.818638	0.617513	0.724241	1.08765	-0.520304		0.537438		1
Q96TA1	Protein Niban 2 (Meg-3) (Melanoma invasion by ERK) (MINERVA) (Niban-like protein 1) (Protein FAM129B)	NIBAN2 C9orf88 FAM129B	1.55841	1.10398	1.13606	0.582003		0.743591	0.967163	0.879206	1.65774	0.383076		0.207088		1
Q9H5Y7	SLIT and NTRK-like protein 6	SLITRK6	1.62268	1.69626	2.51186	1.63896	+	1.36239	1.45644	1.16291	1.4139	0.729927		1.2668		1
Q8NE01	Metal transporter CNNM3 (Ancient conserved domain-containing protein 3) (Cyclin-M3)	CNNM3 ACDP3	1.25449	0.93728	0.832736	0.0200646		0.0180802	0.961192	0.862007	1.07635	-0.0839954		0.213236		1
Q8WWZ8	Oncoprotein-induced transcript 3 protein (Liver-specific zona pellucida domain-containing protein)	OIT3 LZP UNQ826/PRO1753	1.29379		1.35089	0.689092	+	1.30851	1.00189		0.736041	-0.346396		0.297636		1
Q9BZF9	Uveal autoantigen with coiled-coil domains and ankyrin repeats	UACA KIAA1561	0.968123	0.879105	1.09396	-0.0488283		0.129131	0.942985	0.709119	0.919671	-0.379849		0.66294		1
Q96T51	RUN and FYVE domain-containing protein 1 (FYVE-finger protein EIP1) (La-binding protein 1) (Rab4-interacting protein) (Zinc finger FYVE domain-containing protein 12)	RUFY1 RABIP4 ZFYVE12	1.46322	1.44855	1.34055	0.860379	+	2.20378	0.917285	0.841943	1.0618	-0.151704		0.3647		1
Q8IZ07	Ankyrin repeat domain-containing protein 13A (Protein KE03)	ANKRD13A ANKRD13	0.846383			-0.411338			0.876729			-0.32446				1
Q14160	Protein scribble homolog (Scribble) (hScrib) (Protein LAP4)	SCRIB CRIB1 KIAA0147 LAP4 SCRB1 VARTUL	1.2587	1.24702	1.18226	0.509213	+	2.05306	0.958416	1.00696	1.15287	0.0953495		0.232533		1
Q68EM7	Rho GTPase-activating protein 17 (Rho-type GTPase-activating protein 17) (RhoGAP interacting with CIP4 homologs protein 1) (RICH-1)	ARHGAP17 RICH1 MSTP066 MSTP110	1.0875	1.00323	1.38704	0.364464		0.534804	0.880984	0.813538	0.936012	-0.324135		1.08698		1
Q30201	Hereditary hemochromatosis protein (HLA-H)	HFE HLAH	1.32517	1.14538	0.973096	0.34015		0.549274	0.938921	0.815531	1.39621	0.120849		0.0444955		1
P02794	Ferritin heavy chain (Ferritin H subunit) (EC 1.16.3.1) (Cell proliferation-inducing gene 15 protein) [Cleaved into: Ferritin heavy chain, N-terminally processed]	FTH1 FTH FTHL6 OK/SW-cl.84 PIG15	0.70361	0.953532	1.23484	-0.0904441		0.132675	1.46873	1.29613	0.820055	0.439305		0.309659		1
Q96QK1	Vacuolar protein sorting-associated protein 35 (hVPS35) (Maternal-embryonic 3) (Vesicle protein sorting 35)	VPS35 MEM3 TCCCTA00141	1.18351	1.04959	0.784601	0.0145039		0.0220847	0.842158	0.922062	1.69598	0.351976		0.144577		1
Q00765	Receptor expression-enhancing protein 5 (Polyposis locus protein 1) (Protein TB2)	REEP5 C5orf18 DP1 TB2	0.779078	1.50906	1.08466	0.288881		0.147252	1.20219	0.951397	1.6859	0.608504		0.497266		1
Q96RT1	Erbin (Densin-180-like protein) (Erbb2-interacting protein) (Protein LAP2)	ERBIN ERBB2IP KIAA1225 LAP2	1.21055	1.30395	1.33911	0.617555	+	1.84345	0.960267	1.07628	1.15709	0.154257		0.412843		1
O75436	Vacuolar protein sorting-associated protein 26A (Vesicle protein sorting 26A) (hVPS26)	VPS26A VPS26	1.06803	0.932337	0.857495	-0.119714		0.303705	0.953998	1.05955	1.32049	0.26037		0.375912		1
Q16563	Synaptophysin-like protein 1 (Pantophysin)	SYPL1 SYPL	1.28257	1.30106	0.678827	0.206846		0.0633385	0.885319	0.706654	1.33397	-0.0616497		0.109819		1
O00161	Synaptosomal-associated protein 23 (SNAP-23) (Vesicle-membrane fusion protein SNAP-23)	SNAP23	1.83076	1.46989		1.23555		0.857171	0.894176	1.02903		-0.0965633		0.180811		1
Q9Y3C8	Ubiquitin-fold modifier-conjugating enzyme 1 (Ufm1-conjugating enzyme 1)	UFC1 CGI-126 HSPC155	1.08709			0.205949			0.912511			-0.225802				1
Q6NZI2	Caveolae-associated protein 1 (Cavin-1) (Polymerase I and transcript release factor)	CAVIN1 PTRF FKSG13	1.11048	1.10516	1.37018	0.439925		0.87158	0.99559	2.13599	1.32534	0.976274		0.583358		1
P40199	Carcinoembryonic antigen-related cell adhesion molecule 6 (Non-specific crossreacting antigen) (Normal cross-reacting antigen) (CD antigen CD66c)	CEACAM6 NCA	1.02209			0.0538902			0.689455			-0.917105				1
P26012	Integrin beta-8	ITGB8	1.61941		1.94308	1.42383		0.998472	0.997446		1.00619	0.00448138		0.124896		1
Q5VWJ9	Sorting nexin-30	SNX30	0.933529	0.838807		-0.298049		0.580796	0.901414	0.833932		-0.350068		0.770946		1
Q8N271	Prominin-2 (PROM-2) (Prominin-like protein 2) (hPROML2)	PROM2 PROML2 UNQ2521/PRO6014	1.33358	1.83034	1.02205	0.821587		0.673413	0.903266	0.770685	1.74698	0.323827		0.0867335		1
Q4LDE5	Sushi, von Willebrand factor type A, EGF and pentraxin domain-containing protein 1 (CCP module-containing protein 22) (Polydom) (Selectin-like osteoblast-derived protein) (SEL-OB) (Serologically defined breast cancer antigen NY-BR-38)	SVEP1 C9orf13 CCP22 SELOB	1.07353			0.174994			0.799978			-0.550409				1
O95359	Transforming acidic coiled-coil-containing protein 2 (Anti-Zuai-1) (AZU-1)	TACC2	1.7221			1.34055			0.940458			-0.151403				1
P19224	UDP-glucuronosyltransferase 1-6 (UDPGT 1-6) (UGT1*6) (UGT1-06) (UGT1.6) (EC 2.4.1.17) (Phenol-metabolizing UDP-glucuronosyltransferase) (UDP-glucuronosyltransferase 1-F) (UGT-1F) (UGT1F) (UDP-glucuronosyltransferase 1A6)	UGT1A6 GNT1 UGT1	1.05982	0.765302	0.548143	-0.577963		0.535289	1.14469	0.921976	1.26105	0.255697		0.385558		1
Q6ZMI0	Protein phosphatase 1 regulatory subunit 21 (Coiled-coil domain-containing protein 128) (KLRAQ motif-containing protein 1)	PPP1R21 CCDC128 KLRAQ1	1.15929	1.02225	1.14795	0.257007		0.898582	0.885948	0.982611	1.11627	-0.0124996		0.0460007		1
P35222	Catenin beta-1 (Beta-catenin)	CTNNB1 CTNNB OK/SW-cl.35 PRO2286	1.19871	1.08202	1.07786	0.278469		1.07107	1.0204	1.05433	1.53492	0.456263		0.481524		1
P13284	Gamma-interferon-inducible lysosomal thiol reductase (EC 1.8.-.-) (Gamma-interferon-inducible protein IP-30) (Legumaturain)	IFI30 GILT IP30	0.670641			-0.985341			0.48397			-1.78988				1
Q96L93	Kinesin-like protein KIF16B (Sorting nexin-23)	KIF16B C20orf23 KIAA1590 SNX23	0.83165			-0.454647			0.865143			-0.357271				1
Q7L1W4	Volume-regulated anion channel subunit LRRC8D (Leucine-rich repeat-containing protein 5) (Leucine-rich repeat-containing protein 8D) (HsLRRC8D)	LRRC8D LRRC5 UNQ213/PRO239	1.80648	1.38131	1.34929	1.02024	+	1.30487	0.926193	0.932226	1.27735	0.109166		0.103814		1
P61764	Syntaxin-binding protein 1 (MUNC18-1) (N-Sec1) (Protein unc-18 homolog 1) (Unc18-1) (Protein unc-18 homolog A) (Unc-18A) (p67)	STXBP1 UNC18A	1.42206	1.43926	1.72037	1.04437	+	1.68066	1.13193	0.745209	0.91503	-0.177061		0.260698		1
Q9ULT0	Tetratricopeptide repeat protein 7A (TPR repeat protein 7A)	TTC7A KIAA1140 TTC7	1.49858			0.997663			0.776012			-0.625423				1
P05187	Alkaline phosphatase, placental type (EC 3.1.3.1) (Alkaline phosphatase Regan isozyme) (Placental alkaline phosphatase 1) (PLAP-1)	ALPP PLAP	0.361789	0.26401	0.390412	-2.66985	+	1.93103	0.903816	1.31519	1.05771	0.217599		0.255315		1
Q99959	Plakophilin-2	PKP2	0.829777	0.785105	0.895744	-0.4392	+	1.3721	1.11466	1.07806	1.2497	0.339274		1.02763		1
Q9H270	Vacuolar protein sorting-associated protein 11 homolog (hVPS11) (RING finger protein 108)	VPS11 RNF108 PP3476	0.984265	1.14348	1.08296	0.167407		0.566757	0.860925	0.754476	0.893988	-0.440414		1.14262		1
Q15276	Rab GTPase-binding effector protein 1 (Rabaptin-4) (Rabaptin-5) (Rabaptin-5alpha) (Renal carcinoma antigen NY-REN-17)	RABEP1 RAB5EP RABPT5 RABPT5A	1.43518	1.01264	1.37555	0.598131		0.768746	0.756816	0.968656	1.09069	-0.155966		0.251719		1
P61009	Signal peptidase complex subunit 3 (Microsomal signal peptidase 22/23 kDa subunit) (SPC22/23) (SPase 22/23 kDa subunit)	SPCS3 SPC22 UNQ1841/PRO3567	0.903239	0.875512	0.789757	-0.382986		1.21603	1.3555	1.16309	1.87185	0.939208		0.907555		1
P30536	Translocator protein (Mitochondrial benzodiazepine receptor) (PKBS) (Peripheral-type benzodiazepine receptor) (PBR)	TSPO BZRP MBR	1.21544			0.481184			0.716221			-0.82317				1
Q9NUQ9	CYFIP-related Rac1 interactor B (L1)	CYRIB CYRI FAM49B BM-009	1.74778	1.39645	1.05723	0.830701		0.790934	0.893296	0.981995	1.66325	0.40719		0.235273		1
Q13443	Disintegrin and metalloproteinase domain-containing protein 9 (ADAM 9) (EC 3.4.24.-) (Cellular disintegrin-related protein) (Meltrin-gamma) (Metalloprotease/disintegrin/cysteine-rich protein 9) (Myeloma cell metalloproteinase)	ADAM9 KIAA0021 MCMP MDC9 MLTNG	1.01949	0.929198	0.762537	-0.249616		0.4775	1.21846	0.990046	1.47597	0.506861		0.624706		1
Q9UNS2	COP9 signalosome complex subunit 3 (SGN3) (Signalosome subunit 3) (JAB1-containing signalosome subunit 3)	COPS3 CSN3	1.56606	1.20542	0.761658	0.403423		0.205099	1.01158	0.948017	1.54423	0.382878		0.316634		1
O75886	Signal transducing adapter molecule 2 (STAM-2) (Hrs-binding protein)	STAM2 HBP	0.944383	0.907121	1.23018	0.066257		0.0596536	1.09936	1.11398	1.12553	0.26394	+	2.39531		1
P51805	Plexin-A3 (Plexin-4) (Semaphorin receptor SEX)	PLXNA3 PLXN4 SEX	1.0802	1.3065	0.893862	0.220492		0.257276	0.890431	0.937433	0.900059	-0.234476	+	1.58567		1
Q9Y289	Sodium-dependent multivitamin transporter (Na(+)-dependent multivitamin transporter) (Solute carrier family 5 member 6)	SLC5A6 SMVT	1.02023	1.75612	0.748664	0.397748		0.135286	1.08013	0.653806	1.56674	0.23557		0.0427396		1
Q9NXN4	Ganglioside-induced differentiation-associated protein 2	GDAP2	1.34784	1.13926	1.189	0.50125		1.23817	0.62075	0.785715	0.908161	-0.63967		0.872582		1
P17252	Protein kinase C alpha type (PKC-A) (PKC-alpha) (EC 2.7.11.13)	PRKCA PKCA PRKACA	0.642512			-1.09102			0.998168			-0.00452194				1
Q9NV70	Exocyst complex component 1 (Exocyst complex component Sec3)	EXOC1 SEC3 SEC3L1 BM-012	1.13963	1.13499	0.96991	0.193248		0.5369	0.755022	0.816305	1.14084	-0.248759		0.345187		1
Q9Y5Y6	Suppressor of tumorigenicity 14 protein (EC 3.4.21.109) (Matriptase) (Membrane-type serine protease 1) (MT-SP1) (Prostamin) (Serine protease 14) (Serine protease TADG-15) (Tumor-associated differentially-expressed gene 15 protein)	ST14 PRSS14 SNC19 TADG15	1.11573	0.915283	1.39453	0.327148		0.361715	0.918619	1.13397	1.07571	0.10328		0.214932		1
Q13418	Integrin-linked protein kinase (EC 2.7.11.1) (59 kDa serine/threonine-protein kinase) (Beta-integrin-linked kinase) (ILK-1) (ILK-2) (p59ILK)	ILK ILK1 ILK2	1.07763	1.34592	1.05612	0.36581		0.680326	1.02008	1.41522	1.21946	0.486893		0.733772		1
Q9BXW6	Oxysterol-binding protein-related protein 1 (ORP-1) (OSBP-related protein 1)	OSBPL1A ORP1 OSBP8 OSBPL1 OSBPL1B	1.07854	0.54644		-0.512133		0.237145	0.894996	1.367		0.303604		0.144429		1
Q8WWY8	Lipase member H (LIPH) (EC 3.1.1.-) (LPD lipase-related protein) (Membrane-associated phosphatidic acid-selective phospholipase A1-alpha) (mPA-PLA1 alpha) (Phospholipase A1 member B)	LIPH LPDLR MPAPLA1 PLA1B	1.38857			0.809624			0.911971			-0.227262				1
Q9HCU5	Prolactin regulatory element-binding protein (Mammalian guanine nucleotide exchange factor mSec12)	PREB SEC12	1.53528	1.41273	0.764992	0.525884		0.281848	1.18298	1.0582	1.13373	0.290422		1.1582		1
Q96J02	E3 ubiquitin-protein ligase Itchy homolog (Itch) (EC 2.3.2.26) (Atrophin-1-interacting protein 4) (AIP4) (HECT-type E3 ubiquitin transferase Itchy homolog) (NFE2-associated polypeptide 1) (NAPP1)	ITCH	1.16933	1.00546	1.16615	0.265468		0.770932	0.840404	0.933101	1.00763	-0.186835		0.562179		1
Q99536	Synaptic vesicle membrane protein VAT-1 homolog (EC 1.-.-.-)	VAT1	1.56517	1.33763	1.06613	0.69028		0.859141	0.770787	1.07957	1.33809	0.150246		0.0735815		1
P51648	Aldehyde dehydrogenase family 3 member A2 (EC 1.2.1.3) (EC 1.2.1.94) (Aldehyde dehydrogenase 10) (Fatty aldehyde dehydrogenase) (Microsomal aldehyde dehydrogenase)	ALDH3A2 ALDH10 FALDH	1.26151	1.09983	0.689113	0.0411336		0.0258131	0.979123	1.21494	1.57032	0.559778		0.574084		1
P07686	Beta-hexosaminidase subunit beta (EC 3.2.1.52) (Beta-N-acetylhexosaminidase subunit beta) (Hexosaminidase subunit B) (Cervical cancer proto-oncogene 7 protein) (HCC-7) (N-acetyl-beta-glucosaminidase subunit beta) [Cleaved into: Beta-hexosaminidase subunit beta chain B; Beta-hexosaminidase subunit beta chain A]	HEXB HCC7	1.10667	1.23399	1.21108	0.416374	+	1.42135	0.778578	1.04695	1.03292	-0.119207		0.212665		1
P86791	Vacuolar fusion protein CCZ1 homolog	CCZ1 C7orf28A CGI-43	1.19252	0.980902	0.83603	0.00775535		0.0227946	0.736515	0.695553	1.24551	-0.280414		0.297582		1
Q96B45	BLOC-1-related complex subunit 7 (Diaskedin)	BORCS7 C10orf32	1.18034			0.408924			0.769854			-0.645071				1
P63279	SUMO-conjugating enzyme UBC9 (EC 2.3.2.-) (RING-type E3 SUMO transferase UBC9) (SUMO-protein ligase) (Ubiquitin carrier protein 9) (Ubiquitin carrier protein I) (Ubiquitin-conjugating enzyme E2 I) (Ubiquitin-protein ligase I) (p18)	UBE2I UBC9 UBCE9	1.3975	1.3593	1.48228	0.852685	+	2.26508	1.13352	1.48739	1.08062	0.518258		0.739521		1
Q9UN37	Vacuolar protein sorting-associated protein 4A (EC 3.6.4.6) (Protein SKD2) (VPS4-1) (hVPS4)	VPS4A VPS4	1.32829	1.26875	1.30802	0.650265	+	2.58411	1.06434	1.07578	0.972299	0.0907344		0.419253		1
Q6P4Q7	Metal transporter CNNM4 (Ancient conserved domain-containing protein 4) (Cyclin-M4)	CNNM4 ACDP4 KIAA1592	1.33562	1.2941	1.07167	0.518159		1.0175	0.962997	0.829543	1.05472	-0.12888		0.300736		1
Q658P3	Metalloreductase STEAP3 (EC 1.16.1.-) (Dudulin-2) (Six-transmembrane epithelial antigen of prostate 3) (Tumor suppressor-activated pathway protein 6) (hTSAP6) (pHyde) (hpHyde)	STEAP3 TSAP6	0.782652			-0.60441			1.06017			0.144115				1
P31946	14-3-3 protein beta/alpha (Protein 1054) (Protein kinase C inhibitor protein 1) (KCIP-1) [Cleaved into: 14-3-3 protein beta/alpha, N-terminally processed]	YWHAB	1.29232	1.14392	1.10128	0.406483		1.10773	1.17348	1.34492	1.34955	0.626722	+	1.49776		1
P07339	Cathepsin D (EC 3.4.23.5) [Cleaved into: Cathepsin D light chain; Cathepsin D heavy chain]	CTSD CPSD	1.48992	1.40595	1.52181	0.954461	+	2.42823	0.89933	1.22107	0.942802	0.0514191		0.0389504		1
Q92619	Rho GTPase-activating protein 45 [Cleaved into: Minor histocompatibility antigen HA-1 (mHag HA-1)]	ARHGAP45 HMHA1 KIAA0223	1.02732		0.905663	-0.0840623		0.174533	0.606651		0.845785	-0.788982		0.531434		1
P14923	Junction plakoglobin (Catenin gamma) (Desmoplakin III) (Desmoplakin-3)	JUP CTNNG DP3	1.19312	1.14371	0.966022	0.237194		0.538344	1.04396	1.72234	1.42935	0.827284		0.784897		1
P21359	Neurofibromin (Neurofibromatosis-related protein NF-1) [Cleaved into: Neurofibromin truncated]	NF1	1.25546	1.0346	0.916013	0.163849		0.227362	0.912603	0.703386	1.11518	-0.231539		0.308488		1
O75386	Tubby-related protein 3 (Tubby-like protein 3)	TULP3 TUBL3	1.05104		1.4664	0.567487		0.379163	1.10424		0.810071	-0.107997		0.107848		1
Q9UKG1	DCC-interacting protein 13-alpha (Dip13-alpha) (Adapter protein containing PH domain, PTB domain and leucine zipper motif 1)	APPL1 APPL DIP13A KIAA1428	1.11112	0.871303	0.97886	-0.0320389		0.0849357	1.00054	1.18447	1.12429	0.242002		0.709546		1
Q96FJ2	Dynein light chain 2, cytoplasmic (8 kDa dynein light chain b) (DLC8b) (Dynein light chain LC8-type 2)	DYNLL2 DLC2	0.662351	0.560833	0.740833	-1.04478	+	1.47393	1.14762	0.890848	1.0051	0.0355651		0.0396835		1
P02792	Ferritin light chain (Ferritin L subunit)	FTL	0.488618	0.633875	0.700527	-1.22851	+	1.38005	1.045	1.10285	0.75508	-0.081118		0.134821		1
Q8TC07	TBC1 domain family member 15 (GTPase-activating protein RAB7) (GAP for RAB7) (Rab7-GAP)	TBC1D15	1.05346	1.02695	0.760542	-0.134351		0.223545	1.10959	0.953262	1.53003	0.444778		0.433067		1
P04920	Anion exchange protein 2 (AE 2) (Anion exchanger 2) (Non-erythroid band 3-like protein) (BND3L) (Solute carrier family 4 member 2)	SLC4A2 AE2 EPB3L1 HKB3 MPB3L	1.01001	0.930454	0.87684	-0.154962		0.591493	1.12586	1.12955	1.36691	0.4649		0.988228		1
Q9Y6M7	Sodium bicarbonate cotransporter 3 (Electroneutral Na/HCO(3) cotransporter) (Sodium bicarbonate cotransporter 2) (Sodium bicarbonate cotransporter 2b) (Bicarbonate transporter) (Solute carrier family 4 member 7)	SLC4A7 BT NBC2 NBC2B NBC3 NBCn1 SBC2 SLC4A6	1.06145			0.147069			0.974913			-0.0626624				1
P15311	Ezrin (Cytovillin) (Villin-2) (p81)	EZR VIL2	1.14923	0.929948	1.39205	0.359824		0.427653	1.09076	1.09513	0.973934	0.128011		0.495049		1
Q01973	Inactive tyrosine-protein kinase transmembrane receptor ROR1 (Neurotrophic tyrosine kinase, receptor-related 1)	ROR1 NTRKR1	1.61961	2.18135		1.58363		0.831229	1.01879	0.940529		-0.0506877		0.162649		1
P53990	IST1 homolog (hIST1) (Charged multivesicular body protein 8) (CHMP8) (Putative MAPK-activating protein PM28)	IST1 KIAA0174	1.51975		1.05018	0.618378		0.370731	0.787758		1.49188	0.322762		0.0745156		1
Q8WUY1	Protein THEM6 (Mesenchymal stem cell protein DSCD75) (Thioesterase superfamily member 6)	THEM6 C8orf55 PSEC0098	0.962038	0.813833	0.715659	-0.458031		0.815633	1.07145	0.824671	1.40824	0.23832		0.165176		1
Q12768	WASH complex subunit 5 (Strumpellin) (WASH complex subunit strumpellin)	WASHC5 KIAA0196	1.04326	1.05658	0.611922	-0.249134		0.266254	0.801304	0.760073	1.28878	-0.126366		0.168676		1
P27348	14-3-3 protein theta (14-3-3 protein T-cell) (14-3-3 protein tau) (Protein HS1)	YWHAQ	1.3198	1.27987	1.02696	0.467837		0.836447	1.17471	1.28084	1.53637	0.704528		1.14465		1
P13797	Plastin-3 (T-plastin)	PLS3	0.991084	0.829132	0.729108	-0.401475		0.709821	0.980282	1.15275	1.43145	0.425204		0.55082		1
P06865	Beta-hexosaminidase subunit alpha (EC 3.2.1.52) (Beta-N-acetylhexosaminidase subunit alpha) (Hexosaminidase subunit A) (N-acetyl-beta-glucosaminidase subunit alpha)	HEXA	1.25748		0.693255	-0.0615173		0.0676371	0.773864		1.40295	0.208938		0.0397326		1
P53611	Geranylgeranyl transferase type-2 subunit beta (EC 2.5.1.60) (Geranylgeranyl transferase type II subunit beta) (GGTase-II-beta) (Rab geranyl-geranyltransferase subunit beta) (Rab GG transferase beta) (Rab GGTase beta) (Rab geranylgeranyltransferase subunit beta) (Type II protein geranyl-geranyltransferase subunit beta)	RABGGTB GGTB	1.15124		0.956222	0.129076		0.157439	0.97458		1.21397	0.222193		0.233551		1
Q96J84	Kin of IRRE-like protein 1 (Kin of irregular chiasm-like protein 1) (Nephrin-like protein 1)	KIRREL1 KIRREL NEPH1	1.19601	1.34532	1.19142	0.538968	+	1.49265	1.01127	1.36795	1.3607	0.543698		0.771905		1
P53680	AP-2 complex subunit sigma (Adaptor protein complex AP-2 subunit sigma) (Adaptor-related protein complex 2 subunit sigma) (Clathrin assembly protein 2 sigma small chain) (Clathrin coat assembly protein AP17) (Clathrin coat-associated protein AP17) (HA2 17 kDa subunit) (Plasma membrane adaptor AP-2 17 kDa protein) (Sigma2-adaptin)	AP2S1 AP17 CLAPS2	0.948575	0.850984	0.569441	-0.582404		0.625252	1.40953	1.05188	2.11238	1.04012		0.697978		1
P21926	CD9 antigen (5H9 antigen) (Cell growth-inhibiting gene 2 protein) (Leukocyte antigen MIC3) (Motility-related protein) (MRP-1) (Tetraspanin-29) (Tspan-29) (p24) (CD antigen CD9)	CD9 MIC3 TSPAN29 GIG2	1.4944			0.990776			1.21183			0.47386				1
O14908	PDZ domain-containing protein GIPC1 (GAIP C-terminus-interacting protein) (RGS-GAIP-interacting protein) (RGS19-interacting protein 1) (Synectin) (Tax interaction protein 2) (TIP-2)	GIPC1 C19orf3 GIPC RGS19IP1	1.50065	1.10012	1.4921	0.766115		1.00258	1.07717	1.29354	1.14719	0.392766		0.997957		1
Q5T1M5	FK506-binding protein 15 (FKBP-15) (133 kDa FK506-binding protein) (133 kDa FKBP) (FKBP-133) (WASP- and FKBP-like protein) (WAFL)	FKBP15 KIAA0674	1.18089	1.07209	1.3342	0.440859		0.958798	0.761933	0.76984	0.910385	-0.507393		1.16497		1
O15427	Monocarboxylate transporter 4 (MCT 4) (Solute carrier family 16 member 3)	SLC16A3 MCT3 MCT4	1.15362	1.21692		0.419204		1.00247	1.57399	2.1124		1.50815		0.815628		1
Q9BVT8	Transmembrane and ubiquitin-like domain-containing protein 1 (Dendritic cell-derived ubiquitin-like protein) (DULP) (Hepatocyte odd protein shuttling protein) (Ubiquitin-like protein SB144) [Cleaved into: iHOPS]	TMUB1 C7orf21 DULP HOPS SB144 UNQ763/PRO1555	1.242		1.08617	0.374721		0.571821	1.22935		1.60915	0.863528		0.621074		1
P23142	Fibulin-1 (FIBL-1)	FBLN1 PP213	0.843383	0.918417	1.13667	-0.0849125		0.167711	0.893032	0.525066	0.770141	-0.778157		0.782371		1
Q969V3	BOS complex subunit NCLN (Nicalin) (Nicastrin-like protein)	NCLN	1.03114	1.14338	0.790886	-0.0285995		0.0698207	1.441	1.24128	1.35523	0.732528	+	1.68096		1
Q14114	Low-density lipoprotein receptor-related protein 8 (LRP-8) (Apolipoprotein E receptor 2)	LRP8 APOER2	1.13781	1.35827	0.967342	0.354271		0.51592	0.993018	0.894171	1.46163	0.271284		0.207824		1
P43353	Aldehyde dehydrogenase family 3 member B1 (EC 1.2.1.28) (EC 1.2.1.5) (EC 1.2.1.7) (Aldehyde dehydrogenase 7)	ALDH3B1 ALDH7	0.731944			-0.769612			0.945947			-0.13705				1
Q9BX79	Receptor for retinol uptake STRA6 (Retinol-binding protein receptor STRA6) (Stimulated by retinoic acid gene 6 protein homolog)	STRA6 PP14296 UNQ3126/PRO10282/PRO19578	1.58917			1.14242			0.872208			-0.337212				1
P07996	Thrombospondin-1 (Glycoprotein G)	THBS1 TSP TSP1	0.553094	1.14857	1.82518	0.399024		0.0456871	1.04442	0.806771	1.02009	-0.108163		0.219894		1
Q641Q2	WASH complex subunit 2A	WASHC2A FAM21A FAM21B	0.874136	0.901636		-0.293273		1.08423	0.851161	0.832906		-0.424046	+	1.39717		1
O60716	Catenin delta-1 (Cadherin-associated Src substrate) (CAS) (p120 catenin) (p120(ctn)) (p120(cas))	CTNND1 KIAA0384	1.09725	1.02763	1.26221	0.299304		0.716893	1.04575	1.09494	1.09953	0.189976	+	1.38606		1
O00462	Beta-mannosidase (EC 3.2.1.25) (Lysosomal beta A mannosidase) (Mannanase) (Mannase)	MANBA MANB1	0.898707	0.697999	0.7324	-0.62429		1.10295	0.740777	0.868704	1.06683	-0.281585		0.447406		1
Q16543	Hsp90 co-chaperone Cdc37 (Hsp90 chaperone protein kinase-targeting subunit) (p50Cdc37) [Cleaved into: Hsp90 co-chaperone Cdc37, N-terminally processed]	CDC37 CDC37A	1.18791	1.12938	1.055	0.288505		1.10809	1.1899	1.06767	1.01506	0.214522		0.673013		1
Q15075	Early endosome antigen 1 (Endosome-associated protein p162) (Zinc finger FYVE domain-containing protein 2)	EEA1 ZFYVE2	0.700375	0.734085	0.726855	-0.808689	+	2.72208	0.943669	0.878454	0.870745	-0.266374		1.29427		1
Q12905	Interleukin enhancer-binding factor 2 (Nuclear factor of activated T-cells 45 kDa)	ILF2 NF45 PRO3063	1.16576	1.0479	0.86083	0.0604948		0.061649	1.01199	0.981644	1.26949	0.207347		0.35554		1
Q96NW4	Ankyrin repeat domain-containing protein 27 (VPS9 domain-containing protein)	ANKRD27 PP12899	1.28751	1.04383	1.23966	0.429716		0.925044	0.855781	0.849124	0.952488	-0.29908		1.09462		1
Q9H223	EH domain-containing protein 4 (Hepatocellular carcinoma-associated protein 10/11) (PAST homolog 4)	EHD4 HCA10 HCA11 PAST4 FKSG7	1.20116	1.1243	1.46258	0.575229		0.987692	0.960204	1.23789	1.15654	0.275564		0.52696		1
O14684	Prostaglandin E synthase (EC 5.3.99.3) (Glutathione peroxidase PTGES) (EC 1.11.1.-) (Glutathione transferase PTGES) (EC 2.5.1.18) (Microsomal glutathione S-transferase 1-like 1) (MGST1-L1) (Microsomal prostaglandin E synthase 1) (MPGES-1) (p53-induced gene 12 protein)	PTGES MGST1L1 MPGES1 PGES PIG12	1.0888	0.961145		0.0608319		0.109287	0.974829	0.784605		-0.31607		0.363172		1
P20020	Plasma membrane calcium-transporting ATPase 1 (EC 7.2.2.10) (Plasma membrane calcium ATPase isoform 1) (PMCA1) (Plasma membrane calcium pump isoform 1)	ATP2B1 PMCA1	0.997643	1.12412	0.730626	-0.124437		0.182678	1.16697	0.852698	1.43344	0.346913		0.288003		1
Q9BSJ8	Extended synaptotagmin-1 (E-Syt1) (Membrane-bound C2 domain-containing protein)	ESYT1 FAM62A KIAA0747 MBC2	0.822342	0.77528	0.647634	-0.714717		1.26328	1.00297	0.833509	1.10362	-0.0497402		0.110438		1
Q9Y666	Solute carrier family 12 member 7 (Electroneutral potassium-chloride cotransporter 4) (K-Cl cotransporter 4)	SLC12A7 KCC4	1.34302	1.04143	0.848259	0.184252		0.148831	1.23955	1.08041	1.32419	0.479726		1.06567		1
Q8N5K1	CDGSH iron-sulfur domain-containing protein 2 (Endoplasmic reticulum intermembrane small protein) (MitoNEET-related 1 protein) (Miner1) (Nutrient-deprivation autophagy factor-1) (NAF-1)	CISD2 CDGSH2 ERIS ZCD2	1.25878	1.21329	1.11222	0.438873	+	1.39184	0.90861	0.84569	1.07575	-0.143827		0.330321		1
O43865	S-adenosylhomocysteine hydrolase-like protein 1 (DC-expressed AHCY-like molecule) (IP(3)Rs binding protein released with IP(3)) (IRBIT) (Putative adenosylhomocysteinase 2) (S-adenosyl-L-homocysteine hydrolase 2) (AdoHcyase 2)	AHCYL1 DCAL IRBIT XPVKONA	1.33568	0.717462	0.682437	-0.227566		0.236939	0.883434	0.927803	1.07526	-0.0951217		0.259781		1
P49757	Protein numb homolog (h-Numb) (Protein S171)	NUMB C14orf41	0.804754	0.848412	1.06286	-0.24526		0.472607	1.06904	0.76852	0.829172	-0.29043		0.483687		1
O15438	ATP-binding cassette sub-family C member 3 (EC 7.6.2.-) (EC 7.6.2.2) (EC 7.6.2.3) (Canalicular multispecific organic anion transporter 2) (Multi-specific organic anion transporter D) (MOAT-D) (Multidrug resistance-associated protein 3)	ABCC3 CMOAT2 MLP2 MRP3	1.10367	1.1403	0.763525	0.00615185		0.0328712	1.12883	0.748816	1.34425	0.175995		0.0814931		1
Q9HD42	Charged multivesicular body protein 1a (Chromatin-modifying protein 1a) (CHMP1a) (Vacuolar protein sorting-associated protein 46-1) (Vps46-1) (hVps46-1)	CHMP1A CHMP1 KIAA0047 PCOLN3 PRSM1	1.08702			0.205796			1.58007			1.12826				1
P12814	Alpha-actinin-1 (Alpha-actinin cytoskeletal isoform) (F-actin cross-linking protein) (Non-muscle alpha-actinin-1)	ACTN1	1.11304	0.970503	0.894246	-0.0183249		0.0588662	0.942074	0.972405	1.1996	0.0920424		0.143502		1
Q9UBV8	Peflin (PEF protein with a long N-terminal hydrophobic domain) (Penta-EF hand domain-containing protein 1)	PEF1 ABP32 UNQ1845/PRO3573	1.38819	1.02332	1.15758	0.428397		0.694432	1.09819	1.24135	1.08054	0.32321		1.00708		1
Q9NS86	LanC-like protein 2 (Testis-specific adriamycin sensitivity protein)	LANCL2 GPR69B TASP	1.29731	1.15529	1.06652	0.393619		0.955693	0.981947	1.01878	1.27643	0.217926		0.371608		1
Q96SQ9	Cytochrome P450 2S1 (EC 1.14.14.-) (CYPIIS1) (Hydroperoxy icosatetraenoate dehydratase) (EC 4.2.1.152) (Thromboxane-A synthase) (EC 5.3.99.5)	CYP2S1 UNQ891/PRO1906	1.21994	1.50506	1.10407	0.601804		0.909669	0.989435	1.14519	1.73058	0.624967		0.505908		1
Q5HYK7	SH3 domain-containing protein 19 (ADAM-binding protein Eve-1) (EEN-binding protein) (EBP)	SH3D19	1.18761	1.18438	1.26863	0.477336	+	1.87694	1.11258	1.10977	0.950847	0.138424		0.385669		1
Q8IYI6	Exocyst complex component 8 (Exocyst complex 84 kDa subunit)	EXOC8	1.09533	1.00054	0.94764	0.0355104		0.100418	0.879716	0.879175	1.13532	-0.0885433		0.179616		1
Q9BW27	Nuclear pore complex protein Nup85 (85 kDa nucleoporin) (FROUNT) (Nucleoporin Nup75) (Nucleoporin Nup85) (Pericentrin-1)	NUP85 NUP75 PCNT1	1.31594	1.11835	0.731674	0.132804		0.045365	0.916742	0.809582	1.4771	0.161809		0.0542327		1
Q9Y446	Plakophilin-3	PKP3	1.1546	1.08792	1.28761	0.401318		1.08018	1.03584	1.18217	1.02987	0.195803		0.641814		1
P51148	Ras-related protein Rab-5C (EC 3.6.5.2) (L1880) (RAB5L)	RAB5C RABL	1.24255	0.95505	1.02903	0.179614		0.314593	1.01094	1.32728	1.22418	0.423772		0.752165		1
P50990	T-complex protein 1 subunit theta (TCP-1-theta) (CCT-theta) (Chaperonin containing T-complex polypeptide 1 subunit 8) (Renal carcinoma antigen NY-REN-15)	CCT8 C21orf112 CCTQ KIAA0002	1.1728	1.00102	0.80717	-0.0156841		0.0537244	1.00682	1.06582	1.44768	0.394458		0.491261		1
P63010	AP-2 complex subunit beta (AP105B) (Adaptor protein complex AP-2 subunit beta) (Adaptor-related protein complex 2 subunit beta) (Beta-2-adaptin) (Beta-adaptin) (Clathrin assembly protein complex 2 beta large chain) (Plasma membrane adaptor HA2/AP2 adaptin beta subunit)	AP2B1 ADTB2 CLAPB1	1.36756	1.2552	1.03211	0.486969		0.826058	0.960261	1.1963	1.28527	0.338848		0.557894		1
O75608	Acyl-protein thioesterase 1 (APT-1) (hAPT1) (EC 3.1.2.-) (Lysophospholipase 1) (Lysophospholipase I) (LPL-I) (LysoPLA I) (Palmitoyl-protein hydrolase) (EC 3.1.2.22)	LYPLA1 APT1 LPL1	1.39034	1.4251	1.51394	0.904668	+	2.32428	1.29084	1.45103	1.0005	0.545319		0.70622		1
P37268	Squalene synthase (SQS) (SS) (EC 2.5.1.21) (FPP:FPP farnesyltransferase) (Farnesyl-diphosphate farnesyltransferase) (Farnesyl-diphosphate farnesyltransferase 1)	FDFT1	1.16538	1.16215	0.727219	0.0446037		0.0100458	0.79013	0.914048	1.13725	-0.133931		0.222919		1
Q16513	Serine/threonine-protein kinase N2 (EC 2.7.11.13) (PKN gamma) (Protein kinase C-like 2) (Protein-kinase C-related kinase 2)	PKN2 PRK2 PRKCL2	0.989732	0.786989	0.706784	-0.465988		0.737574	1.01573	1.29883	1.12976	0.340634		0.693364		1
P55011	Solute carrier family 12 member 2 (Basolateral Na-K-Cl symporter) (Bumetanide-sensitive sodium-(potassium)-chloride cotransporter 2)	SLC12A2 NKCC1	0.984868	1.15139	1.2338	0.286877		0.628804	1.16417	0.87869	1.06078	0.0837662		0.11161		1
P61160	Actin-related protein 2 (Actin-like protein 2)	ACTR2 ARP2	1.48118	1.09485	0.968428	0.411317		0.449005	0.984092	1.39338	1.71866	0.768086		0.655762		1
Q7Z7A4	PX domain-containing protein kinase-like protein (Modulator of Na,K-ATPase) (MONaKA)	PXK	1.4228	1.13284		0.604623		0.547341	0.974391	0.906017		-0.152068		0.473185		1
P16333	Cytoplasmic protein NCK1 (NCK adaptor protein 1) (Nck-1) (SH2/SH3 adaptor protein NCK-alpha)	NCK1 NCK	1.35251	1.31768	1.48127	0.801172	+	1.92801	1.06313	1.04429	0.980246	0.0710374		0.431034		1
Q9P2R3	Rabankyrin-5 (Rank-5) (Ankyrin repeat and FYVE domain-containing protein 1) (Ankyrin repeats hooked to a zinc finger motif)	ANKFY1 ANKHZN KIAA1255	1.21788	1.08056	0.948721	0.195251		0.384235	0.91515	0.981987	1.43894	0.261881		0.218804		1
Q9NPF4	tRNA N6-adenosine threonylcarbamoyltransferase (EC 2.3.1.234) (N6-L-threonylcarbamoyladenine synthase) (t(6)A synthase) (O-sialoglycoprotein endopeptidase) (hOSGEP) (t(6)A37 threonylcarbamoyladenosine biosynthesis protein OSGEP) (tRNA threonylcarbamoyladenosine biosynthesis protein OSGEP)	OSGEP GCPL1	1.1208			0.281256			0.802064			-0.543984				1
P07099	Epoxide hydrolase 1 (EC 3.3.2.9) (Epoxide hydratase) (Microsomal epoxide hydrolase) (mEH)	EPHX1 EPHX EPOX	1.05652	1.0399	0.755944	-0.124463		0.202378	1.03148	0.919148	1.38639	0.262577		0.272335		1
P34949	Mannose-6-phosphate isomerase (EC 5.3.1.8) (Phosphohexomutase) (Phosphomannose isomerase) (PMI)	MPI PMI1	1.27426		1.41164	0.727239		0.958937	0.868591		0.902717	-0.299481		0.999853		1
Q9BYG5	Partitioning defective 6 homolog beta (PAR-6 beta) (PAR-6B)	PARD6B PAR6B	1.04855	0.903948	1.09316	0.0372512		0.0673019	0.977664	1.59525	1.0736	0.481324		0.430931		1
O94876	Transmembrane and coiled-coil domains protein 1	TMCC1 KIAA0779	1.38947			0.811228			1.0958			0.225634				1
Q14210	Lymphocyte antigen 6D (Ly-6D) (E48 antigen)	LY6D E48	0.588148			-1.30906			0.801395			-0.546044				1
Q969J3	BLOC-1-related complex subunit 5 (Loss of heterozygosity 12 chromosomal region 1) (Myristoylated lysosomal protein) (Myrlysin)	BORCS5 LOH12CR1	1.21364	1.24428	1.40222	0.621735	+	1.51811	0.800885	0.928024	0.705469	-0.515262		0.94688		1
O15194	CTD small phosphatase-like protein (CTDSP-like) (EC 3.1.3.16) (Carboxy-terminal domain RNA polymerase II polypeptide A small phosphatase 3) (NIF-like protein) (Nuclear LIM interactor-interacting factor 1) (NLI-interacting factor 1) (Protein YA22) (hYA22) (RBSP3) (Small C-terminal domain phosphatase 3) (SCP3) (Small CTD phosphatase 3)	CTDSPL C3orf8 NIF1 NIFL SCP3 YA22	0.860839			-0.36957			0.881048			-0.31234				1
Q9UHR4	Brain-specific angiogenesis inhibitor 1-associated protein 2-like protein 1 (BAI1-associated protein 2-like protein 1) (Insulin receptor tyrosine kinase substrate)	BAIAP2L1 IRTKS	1.15344	1.23897	1.42783	0.596105		1.20015	1.11486	1.03679	0.897241	0.0398681		0.0621403		1
P34059	N-acetylgalactosamine-6-sulfatase (EC 3.1.6.4) (Chondroitinsulfatase) (Chondroitinase) (Galactose-6-sulfate sulfatase) (GalN6S) (N-acetylgalactosamine-6-sulfate sulfatase) (GalNAc6S sulfatase)	GALNS	1.30912	1.21635	1.32843	0.617741	+	1.93127	1.0376	1.03912	0.749222	-0.14741		0.236365		1
O75340	Programmed cell death protein 6 (Apoptosis-linked gene 2 protein homolog) (ALG-2)	PDCD6 ALG2	1.44761	1.29575	0.882404	0.467244		0.421128	1.10034	1.61415	1.66269	0.931753		0.94655		1
Q14145	Kelch-like ECH-associated protein 1 (Cytosolic inhibitor of Nrf2) (INrf2) (Kelch-like protein 19)	KEAP1 INRF2 KIAA0132 KLHL19	1.01668	1.03379	1.01187	0.0507273		1.05895	0.542732	0.502919	0.725032	-1.30035	+	1.39755		1
P53007	Tricarboxylate transport protein, mitochondrial (Citrate transport protein) (CTP) (Mitochondrial citrate carrier) (CIC) (Solute carrier family 25 member 1) (Tricarboxylate carrier protein)	SLC25A1 SLC20A3	0.944227	0.877843	0.909352	-0.231315	+	1.33309	1.10723	1.08832	1.31597	0.388288		0.896972		1
Q14651	Plastin-1 (Intestine-specific plastin) (I-plastin)	PLS1	1.3043	0.881714	0.895731	0.066303		0.0243632	0.922935	0.980839	1.36605	0.21241		0.207633		1
P61225	Ras-related protein Rap-2b (EC 3.6.5.2)	RAP2B	1.17181	1.15078	0.7423	0.0527743		0.000675886	0.83433	0.960804	1.44429	0.189374		0.0998661		1
Q9UGV2	Protein NDRG3 (N-myc downstream-regulated gene 3 protein)	NDRG3	1.52805	1.41612	1.19721	0.795176	+	1.31942	1.02075	1.29196	1.25658	0.428528		0.818701		1
P52209	6-phosphogluconate dehydrogenase, decarboxylating (EC 1.1.1.44)	PGD PGDH	1.26666	1.15053	0.911663	0.256532		0.362178	0.932186	0.890672	1.38446	0.164807		0.112527		1
P63104	14-3-3 protein zeta/delta (Protein kinase C inhibitor protein 1) (KCIP-1)	YWHAZ	1.31404	1.22506	1.02105	0.422208		0.800113	1.13566	1.12291	1.21777	0.363449	+	1.54359		1
Q8TF72	Protein Shroom3 (Shroom-related protein) (hShrmL)	SHROOM3 KIAA1481 SHRML MSTP013	1.38634	1.36875	1.22367	0.696381	+	1.71316	0.87329	0.977296	1.07157	-0.064845		0.17737		1
P23634	Plasma membrane calcium-transporting ATPase 4 (PMCA4) (EC 7.2.2.10) (Matrix-remodeling-associated protein 1) (Plasma membrane calcium ATPase isoform 4) (Plasma membrane calcium pump isoform 4)	ATP2B4 ATP2B2 MXRA1	1.18671	1.18306	0.773032	0.114693		0.0626328	1.12694	0.81212	1.6188	0.420624		0.23786		1
O00159	Unconventional myosin-Ic (Myosin I beta) (MMI-beta) (MMIb)	MYO1C	1.2179	1.03569	1.00763	0.205911		0.510003	0.865925	0.922196	1.16203	-0.0413293		0.0933577		1
P30046	D-dopachrome decarboxylase (EC 4.1.1.84) (D-dopachrome tautomerase) (Phenylpyruvate tautomerase II)	DDT	1.35377	1.15171	1.55948	0.749244		1.11125	1.60186	1.49257	1.29613	0.939272	+	1.58173		1
O60941	Dystrobrevin beta (DTN-B) (Beta-dystrobrevin)	DTNB	1.04927	1.26219		0.356957		0.431419	1.04276	0.929092		-0.0349624		0.0812078		1
P02786	Transferrin receptor protein 1 (TR) (TfR) (TfR1) (Trfr) (T9) (p90) (CD antigen CD71) [Cleaved into: Transferrin receptor protein 1, serum form (sTfR)]	TFRC	1.18994	0.983939	0.696822	-0.108654		0.150483	1.16456	0.97097	1.70417	0.608637		0.497747		1
Q13114	TNF receptor-associated factor 3 (EC 2.3.2.27) (CD40 receptor-associated factor 1) (CRAF1) (CD40-binding protein) (CD40BP) (LMP1-associated protein 1) (LAP1) (RING-type E3 ubiquitin transferase TRAF3)	TRAF3 CAP-1 CRAF1 TRAFAMN	1.22465	1.29679		0.571396		1.10581	1.16699	1.22973		0.446294		1.03786		1
P36871	Phosphoglucomutase-1 (PGM 1) (EC 5.4.2.2) (Glucose phosphomutase 1)	PGM1	1.22731	1.13291	1.16387	0.397103	+	1.68186	1.11428	1.06406	1.47836	0.4882		0.676993		1
Q5JTC6	APC membrane recruitment protein 1 (Amer1) (Protein FAM123B) (Wilms tumor gene on the X chromosome protein)	AMER1 FAM123B WTX	0.785324	0.818935	0.5305	-0.839182		0.913153	1.00503	0.90037	1.58309	0.372056		0.252107		1
O43292	Glycosylphosphatidylinositol anchor attachment 1 protein (GPI anchor attachment protein 1) (GAA1 protein homolog) (hGAA1)	GPAA1 GAA1	0.956566			-0.109517			1.13354			0.309135				1
Q9Y5K8	V-type proton ATPase subunit D (V-ATPase subunit D) (V-ATPase 28 kDa accessory protein) (Vacuolar proton pump subunit D)	ATP6V1D ATP6M VATD	1.07366	1.11481	0.755692	-0.0463387		0.0902704	0.702361	1.26501	1.02025	-0.0101921		0.0621892		1
A5YKK6	CCR4-NOT transcription complex subunit 1 (CCR4-associated factor 1) (Negative regulator of transcription subunit 1 homolog) (NOT1H) (hNOT1)	CNOT1 CDC39 KIAA1007 NOT1 AD-005	1.17198	1.10302	0.70549	-0.0160928		0.0627016	0.985249	0.999881	1.35326	0.263593		0.344959		1
Q8ND30	Liprin-beta-2 (Protein tyrosine phosphatase receptor type f polypeptide-interacting protein-binding protein 2) (PTPRF-interacting protein-binding protein 2)	PPFIBP2	1.06588		1.29628	0.41047		0.46028	1.08523		0.911412	-0.00414691		0.0177098		1
P57764	Gasdermin-D (Gasdermin domain-containing protein 1) [Cleaved into: Gasdermin-D, N-terminal (GSDMD-NT) (hGSDMD-NTD); Gasdermin-D, C-terminal (GSDMD-CT) (hGSDMD-CTD)]	GSDMD DFNA5L GSDMDC1 FKSG10	1.58093	1.1844	0.94675	0.525275		0.485129	0.863171	1.01175	1.72653	0.450656		0.235903		1
Q9Y5X3	Sorting nexin-5	SNX5	1.15426	1.03535	1.55882	0.549305		0.63409	0.944246	0.950722	0.984108	-0.101471		1.07545		1
Q92887	ATP-binding cassette sub-family C member 2 (EC 7.6.2.-) (EC 7.6.2.2) (EC 7.6.2.3) (Canalicular multidrug resistance protein) (Canalicular multispecific organic anion transporter 1) (Multidrug resistance-associated protein 2)	ABCC2 CMOAT CMOAT1 CMRP MRP2	0.919189	0.840998	0.631859	-0.558527		0.771975	1.25122	0.680647	1.92383	0.618894		0.193937		1
P31689	DnaJ homolog subfamily A member 1 (DnaJ protein homolog 2) (HSDJ) (Heat shock 40 kDa protein 4) (Heat shock protein J2) (HSJ-2) (Human DnaJ protein 2) (hDj-2)	DNAJA1 DNAJ2 HDJ2 HSJ2 HSPF4	1.19696	1.02301	1.29033	0.387426		0.80808	1.19251	1.02852	0.989904	0.167577		0.428639		1
Q86SQ4	Adhesion G-protein coupled receptor G6 (Developmentally regulated G-protein-coupled receptor) (G-protein coupled receptor 126) (Vascular inducible G protein-coupled receptor) [Cleaved into: ADGRG6 N-terminal fragment (ADGRG6-NTF); ADGRG6 C-terminal fragment (ADGRG6-CTF)]	ADGRG6 DREG GPR126 VIGR	1.33018	1.83963		1.1358		0.655012	0.957761	0.879802		-0.208914		0.533039		1
O95749	Geranylgeranyl pyrophosphate synthase (GGPP synthase) (GGPPSase) (EC 2.5.1.-) ((2E,6E)-farnesyl diphosphate synthase) (Dimethylallyltranstransferase) (EC 2.5.1.1) (Farnesyl diphosphate synthase) (Farnesyltranstransferase) (EC 2.5.1.29) (Geranylgeranyl diphosphate synthase) (Geranyltranstransferase) (EC 2.5.1.10)	GGPS1	1.21423	1.13083		0.392551		0.852183	1.02546	1.16174		0.220674		0.40425		1
P38606	V-type proton ATPase catalytic subunit A (V-ATPase subunit A) (EC 7.1.2.2) (V-ATPase 69 kDa subunit) (Vacuolar ATPase isoform VA68) (Vacuolar proton pump subunit alpha)	ATP6V1A ATP6A1 ATP6V1A1 VPP2	1.06577	0.906513	0.840032	-0.159335		0.370714	0.731706	0.806798	0.991137	-0.420591		0.735554		1
Q14974	Importin subunit beta-1 (Importin-90) (Karyopherin subunit beta-1) (Nuclear factor p97) (Pore targeting complex 97 kDa subunit) (PTAC97)	KPNB1 NTF97	1.25215	1.09716	0.741501	0.0735469		0.0122077	0.923821	0.924053	1.64855	0.37766		0.211185		1
P08240	Signal recognition particle receptor subunit alpha (SR-alpha) (Docking protein alpha) (DP-alpha)	SRPRA SRPR	0.979031	1.08172	1.0612	0.0982749		0.480424	0.904981	0.979308	1.16652	0.0414235		0.047691		1
Q14165	Malectin	MLEC KIAA0152	0.727344		0.628962	-0.957868		0.931923	1.41521		1.15368	0.617375		0.599643		1
Q9BZ67	FERM domain-containing protein 8 (Band4.1 inhibitor LRP interactor) (Bili) (iRhom tail-associated protein) (iTAP)	FRMD8 FKSG44	1.12413	1.06905	1.39369	0.440648		0.772506	0.826639	1.05404	1.21408	0.0767004		0.0541722		1
Q9NQC3	Reticulon-4 (Foocen) (Neurite outgrowth inhibitor) (Nogo protein) (Neuroendocrine-specific protein) (NSP) (Neuroendocrine-specific protein C homolog) (RTN-x) (Reticulon-5)	RTN4 KIAA0886 NOGO My043 SP1507	1.04448	0.934016	0.769885	-0.216052		0.401996	0.940115	0.935068	1.63796	0.389423		0.236152		1
Q9UNE7	E3 ubiquitin-protein ligase CHIP (EC 2.3.2.27) (Antigen NY-CO-7) (CLL-associated antigen KW-8) (Carboxy terminus of Hsp70-interacting protein) (RING-type E3 ubiquitin transferase CHIP) (STIP1 homology and U box-containing protein 1)	STUB1 CHIP PP1131	0.999926	0.991183	1.16006	0.121248		0.338815	1.11304	1.08659	1.03767	0.187751		1.17683		1
Q9Y5Q9	General transcription factor 3C polypeptide 3 (Transcription factor IIIC 102 kDa subunit) (TFIIIC 102 kDa subunit) (TFIIIC102) (Transcription factor IIIC subunit gamma) (TF3C-gamma)	GTF3C3	1.2911	0.971094	0.558178	-0.152281		0.169641	0.823908	0.659391	1.52201	0.0043604		0.0842558		1
P30048	Thioredoxin-dependent peroxide reductase, mitochondrial (EC 1.11.1.24) (Antioxidant protein 1) (AOP-1) (HBC189) (Peroxiredoxin III) (Prx-III) (Peroxiredoxin-3) (Protein MER5 homolog) (Thioredoxin-dependent peroxiredoxin 3)	PRDX3 AOP1	1.0928	1.03114	1.02995	0.123377		0.898255	1.05248	1.07099	1.11616	0.189524	+	1.31801		1
Q5T0N5	Formin-binding protein 1-like (Transducer of Cdc42-dependent actin assembly protein 1) (Toca-1)	FNBP1L C1orf39 TOCA1	1.055	1.14746	1.45445	0.488342		0.723891	1.1071	1.51469	1.08923	0.524575		0.694257		1
Q96HP0	Dedicator of cytokinesis protein 6	DOCK6 KIAA1395	0.783135	0.553429		-0.994031		0.601092	0.85246	0.856304		-0.388138	+	2.04101		1
P05109	Protein S100-A8 (Calgranulin-A) (Calprotectin L1L subunit) (Cystic fibrosis antigen) (CFAG) (Leukocyte L1 complex light chain) (Migration inhibitory factor-related protein 8) (MRP-8) (p8) (S100 calcium-binding protein A8) (Urinary stone protein band A)	S100A8 CAGA CFAG MRP8	6.86161	2.18346	3.56733	3.54178		1.24242	0.784036	3.10759	1.08184	1.24673		0.285191		1
Q9HCY8	Protein S100-A14 (S100 calcium-binding protein A14) (S114)	S100A14 S100A15	1.26597	1.87663	1.39738	1.02182		1.11135	1.15496	1.7474	1.08724	0.703093		0.655497		1
Q15464	SH2 domain-containing adapter protein B	SHB	1.39707	1.47735		0.894543	+	1.30991	1.40855	1.40903	0.618586	0.334787		0.0827944		1
Q9P246	Stromal interaction molecule 2	STIM2 KIAA1482	1.2253		1.11207	0.384444		0.713716	0.981418		1.2127	0.228462		0.250476		1
Q9Y277	Voltage-dependent anion-selective channel protein 3 (VDAC-3) (hVDAC3) (Outer mitochondrial membrane protein porin 3)	VDAC3	1.01378	0.957664	1.11845	0.0728164		0.217329	1.23991	1.3843	0.999166	0.46562		0.696364		1
Q9Y673	Dolichyl-phosphate beta-glucosyltransferase (DolP-glucosyltransferase) (EC 2.4.1.117) (Asparagine-linked glycosylation protein 5 homolog)	ALG5 HSPC149	1.11858	0.851943	0.679422	-0.306006		0.376128	0.977425	1.30912	1.55198	0.607881		0.63379		1
Q9NXW2	DnaJ homolog subfamily B member 12	DNAJB12	1.47121	1.02651	1.00618	0.382929		0.425018	1.177	1.45946	1.7074	0.912906		1.09844		1
Q8NFQ8	Torsin-1A-interacting protein 2 (Lumenal domain-like LAP1)	TOR1AIP2 IFRG15 LULL1	0.948759		0.971217	-0.10071		0.751212	1.18299		1.12904	0.357559		0.992208		1
Q7Z404	Transmembrane channel-like protein 4	TMC4	1.13614			0.314794			0.939236			-0.154608				1
O60784	Target of Myb1 membrane trafficking protein (Target of Myb protein 1)	TOM1	0.947807	1.12293	1.2857	0.276886		0.446545	0.760008	0.833579	0.821108	-0.535285	+	1.77404		1
Q06210	Glutamine--fructose-6-phosphate aminotransferase [isomerizing] 1 (EC 2.6.1.16) (D-fructose-6-phosphate amidotransferase 1) (Glutamine:fructose-6-phosphate amidotransferase 1) (GFAT 1) (GFAT1) (Hexosephosphate aminotransferase 1)	GFPT1 GFAT GFPT	1.25867	1.11093	0.835156	0.162834		0.147752	0.975356	0.952319	1.17455	0.0826384		0.152281		1
Q96A65	Exocyst complex component 4 (Exocyst complex component Sec8)	EXOC4 KIAA1699 SEC8 SEC8L1	1.27585	1.20148	1.00444	0.367308		0.737189	0.921923	0.755092	1.38543	0.0508088		0.0212356		1
Q7L5Y9	E3 ubiquitin-protein transferase MAEA (EC 2.3.2.27) (Cell proliferation-inducing gene 5 protein) (Erythroblast macrophage protein) (Human lung cancer oncogene 10 protein) (HLC-10) (Macrophage erythroblast attacher) (P44EMLP)	MAEA EMP HLC10 PIG5	0.810648	0.830802		-0.48726	+	1.40341	0.955314	1.00751		-0.0462762		0.21949		1
Q9NZN4	EH domain-containing protein 2 (PAST homolog 2)	EHD2 PAST2	1.10143	1.01179	1.26175	0.290467		0.659003	0.935566	0.761609	1.22127	-0.0679763		0.115283		1
O15400	Syntaxin-7	STX7	1.3605	1.37532	1.15744	0.642806	+	1.35829	0.881945	0.923277	0.857353	-0.294275	+	1.50912		1
Q8WV92	MIT domain-containing protein 1	MITD1	1.76867	1.30656		1.06108		0.655901	1.00108	1.19287		0.228267		0.304419		1
Q15019	Septin-2 (Neural precursor cell expressed developmentally down-regulated protein 5) (NEDD-5)	SEPTIN2 DIFF6 KIAA0158 NEDD5 SEPT2	1.2281	1.12545	1.16677	0.394459	+	1.61351	1.00279	1.0425	1.07348	0.0957626		0.719638		1
O75190	DnaJ homolog subfamily B member 6 (HHDJ1) (Heat shock protein J2) (HSJ-2) (MRJ) (MSJ-1)	DNAJB6 HSJ2 MRJ MSJ1	1.18659		1.62952	0.84399		0.544464	1.48953		1.83371	1.25237		0.886462		1
P56589	Peroxisomal biogenesis factor 3 (Peroxin-3) (Peroxisomal assembly protein PEX3)	PEX3	1.11682	1.00134	0.765454	-0.0975931		0.161371	0.799706	0.888112	1.49176	0.143383		0.0317484		1
Q13557	Calcium/calmodulin-dependent protein kinase type II subunit delta (CaM kinase II subunit delta) (CaMK-II subunit delta) (EC 2.7.11.17)	CAMK2D CAMKD	0.913474	0.864003		-0.290906		0.832415	1.15492	1.16425		0.365159	+	1.76201		1
Q9UL15	BAG family molecular chaperone regulator 5 (BAG-5) (Bcl-2-associated athanogene 5)	BAG5 KIAA0873	1.12971	1.20067	1.1706	0.38087	+	1.88988	0.926769	1.27509	1.10908	0.243221		0.364655		1
O95865	N(G),N(G)-dimethylarginine dimethylaminohydrolase 2 (DDAH-2) (Dimethylarginine dimethylaminohydrolase 2) (EC 3.5.3.18) (DDAHII) (Dimethylargininase-2) (Protein G6a) (S-phase protein)	DDAH2 DDAH G6A NG30	0.944575	1.07242	1.20365	0.175032		0.351886	0.995822	1.19572	0.94805	0.112167		0.204166		1
Q8N122	Regulatory-associated protein of mTOR (Raptor) (p150 target of rapamycin (TOR)-scaffold protein)	RPTOR KIAA1303 RAPTOR	1.0738	1.28993	0.680985	0.0364912		0.0326029	0.711772	0.70002	1.23196	-0.311776		0.324766		1
Q9Y376	Calcium-binding protein 39 (MO25alpha) (Protein Mo25)	CAB39 MO25 CGI-66	1.22023	1.15061	1.19454	0.425827	+	2.00966	1.05996	1.41449	1.60316	0.756904		0.85472		1
Q9Y2J4	Angiomotin-like protein 2 (Leman coiled-coil protein) (LCCP)	AMOTL2 KIAA0989	1.20114	1.29742	1.70777	0.833557		1.03379	0.910524	1.18548	0.950615	0.0380289		0.0334351		1
Q16625	Occludin	OCLN	1.08585	1.09839	0.958929	0.114977		0.38567	1.20053	1.04379	1.39167	0.474188		0.808906		1
Q8TCJ2	Dolichyl-diphosphooligosaccharide--protein glycosyltransferase subunit STT3B (Oligosaccharyl transferase subunit STT3B) (STT3-B) (EC 2.4.99.18) (Source of immunodominant MHC-associated peptides homolog)	STT3B SIMP	0.945539	1.09037	0.819924	-0.121464		0.246932	1.21638	0.731087	1.04927	-0.00268787		0.0493065		1
Q7KZI7	Serine/threonine-protein kinase MARK2 (EC 2.7.11.1) (EC 2.7.11.26) (ELKL motif kinase 1) (EMK-1) (MAP/microtubule affinity-regulating kinase 2) (PAR1 homolog) (PAR1 homolog b) (Par-1b) (Par1b)	MARK2 EMK1	1.18172	1.0802	1.2224	0.36911		1.24647	0.963618	0.906968	1.09504	-0.0284229		0.087898		1
Q92973	Transportin-1 (Importin beta-2) (Karyopherin beta-2) (M9 region interaction protein) (MIP)	TNPO1 KPNB2 MIP1 TRN	1.12288	0.930762	0.574857	-0.326041		0.315068	0.997608	0.843223	1.587	0.328799		0.179684		1
Q96FN4	Copine-2 (Copine II)	CPNE2	1.24789	1.26085	1.55964	0.751311		1.26576	1.00024	1.12562	1.11415	0.18982		0.736432		1
P29353	SHC-transforming protein 1 (SHC-transforming protein 3) (SHC-transforming protein A) (Src homology 2 domain-containing-transforming protein C1) (SH2 domain protein C1)	SHC1 SHC SHCA	1.03669	1.04321	1.31689	0.306367		0.563821	1.18588	1.02726	0.969496	0.14575		0.344744		1
O00186	Syntaxin-binding protein 3 (Platelet Sec1 protein) (PSP) (Protein unc-18 homolog 3) (Unc18-3) (Protein unc-18 homolog C) (Unc-18C)	STXBP3	0.846418	0.854571	0.902271	-0.34984	+	1.72105	0.961144	1.01141	0.930067	-0.0813832		0.519567		1
P61158	Actin-related protein 3 (Actin-like protein 3)	ACTR3 ARP3	1.50321	1.18072	1.00806	0.511891		0.625174	0.899188	0.912371	1.55395	0.283541		0.156802		1
O43795	Unconventional myosin-Ib (MYH-1c) (Myosin I alpha) (MMI-alpha) (MMIa)	MYO1B	1.10664	0.912906	1.06701	0.0701448		0.146999	1.00424	0.841784	1.00927	-0.121923		0.329099		1
P26447	Protein S100-A4 (Calvasculin) (Metastasin) (Placental calcium-binding protein) (Protein Mts1) (S100 calcium-binding protein A4)	S100A4 CAPL MTS1	5.00622	7.0347	6.88193	4.54233	+	2.4452	1.0829	1.10378	0.976582	0.130693		0.511505		1
P78537	Biogenesis of lysosome-related organelles complex 1 subunit 1 (BLOC-1 subunit 1) (GCN5-like protein 1) (Protein RT14)	BLOC1S1 BLOS1 GCN5L1 RT14	1.12991			0.301225			0.875844			-0.32695				1
P15586	N-acetylglucosamine-6-sulfatase (EC 3.1.6.14) (Glucosamine-6-sulfatase) (G6S)	GNS	0.753347	0.865093	1.03491	-0.302834		0.538451	0.940359	1.24148	1.04307	0.178292		0.29848		1
P61020	Ras-related protein Rab-5B (EC 3.6.5.2)	RAB5B	0.915024	0.855558	0.791827	-0.388849		1.20525	1.0585	1.45212	1.28783	0.582002		0.878863		1
Q9Y4P1	Cysteine protease ATG4B (EC 3.4.22.-) (AUT-like 1 cysteine endopeptidase) (Autophagy-related cysteine endopeptidase 1) (Autophagin-1) (Autophagy-related protein 4 homolog B) (HsAPG4B) (hAPG4B)	ATG4B APG4B AUTL1 KIAA0943	1.49526	1.19133	0.938892	0.467053		0.481373	0.833111	1.12342	1.30909	0.209241		0.180036		1
Q96RF0	Sorting nexin-18 (SH3 and PX domain-containing protein 3B)	SNX18 SH3PXD3B	1.00505	1.33664	1.31156	0.485879		0.752742	0.991495	1.12751	0.907181	0.0214305		0.0233805		1
P55196	Afadin (ALL1-fused gene from chromosome 6 protein) (Protein AF-6) (Afadin adherens junction formation factor)	AFDN AF6 MLLT4	1.07237	1.09834	1.22994	0.309159		1.00056	1.16262	1.13039	1.04785	0.265411		1.12343		1
P20339	Ras-related protein Rab-5A (EC 3.6.5.2)	RAB5A RAB5	1.04108	1.06784	0.746134	-0.122134		0.191422	1.00835	1.36417	1.44396	0.593675		0.753244		1
Q9UPT5	Exocyst complex component 7 (Exocyst complex component Exo70)	EXOC7 EXO70 KIAA1067	1.04337	1.01004	1.06015	0.0916341		0.913631	0.866524	0.905884	1.11311	-0.0959563		0.208437		1
O94886	CSC1-like protein 1 (Transmembrane protein 63A)	TMEM63A KIAA0489 KIAA0792	1.01678	1.61443		0.6765		0.32067	0.784028	0.655312		-0.811321		0.776085		1
Q92963	GTP-binding protein Rit1 (EC 3.6.5.2) (Ras-like protein expressed in many tissues) (Ras-like without CAAX protein 1)	RIT1 RIBB RIT ROC1	1.0906			0.213891			1.13554			0.313477				1
Q13796	Protein Shroom2 (Apical-like protein) (Protein APXL)	SHROOM2 APXL	0.989359	0.993128	1.22778	0.167069		0.32499	1.04796	0.926457	0.901915	-0.10382		0.357307		1
Q9BTY2	Plasma alpha-L-fucosidase (EC 3.2.1.51) (Alpha-L-fucoside fucohydrolase 2) (Alpha-L-fucosidase 2)	FUCA2 PSEC0151 UNQ227/PRO260		1.6486	0.863023	0.561783		0.165942		0.689202	0.951217	-0.488811		0.381982		1
Q13103	Secreted phosphoprotein 24 (Spp-24) (Secreted phosphoprotein 2)	SPP2 SPP24		1.21762	2.40657	1.46617		0.444193		1.19845	0.856501	0.0668498		0.0220111		1
Q14515	SPARC-like protein 1 (High endothelial venule protein) (Hevin) (MAST 9)	SPARCL1		1.14597		0.336041				0.746645		-0.72057				1
P55061	Bax inhibitor 1 (BI-1) (Testis-enhanced gene transcript protein) (Transmembrane BAX inhibitor motif-containing protein 6)	TMBIM6 BI1 TEGT		1.13824		0.319349				0.973312		-0.0667147				1
Q14112	Nidogen-2 (NID-2) (Osteonidogen)	NID2		1.49273	4.4755	2.69642		0.476633		0.4361	0.717074	-1.35802		0.589475		1
Q9BQI0	Allograft inflammatory factor 1-like (Ionized calcium-binding adapter molecule 2)	AIF1L C9orf58 IBA2 UNQ672/PRO1306	0.784776	1.13087	0.907721	-0.14966		0.246132	0.813875	2.41329	1.52835	1.13621		0.437849		1
Q08188	Protein-glutamine gamma-glutamyltransferase E (EC 2.3.2.13) (Transglutaminase E) (TG(E)) (TGE) (TGase E) (Transglutaminase-3) (TGase-3) [Cleaved into: Protein-glutamine gamma-glutamyltransferase E 50 kDa catalytic chain; Protein-glutamine gamma-glutamyltransferase E 27 kDa non-catalytic chain]	TGM3		2.71851		2.46651				2.81605		2.55345				1
Q6P9B6	MTOR-associated protein MEAK7 (MEAK7) (MTOR associated protein, eak-7 homolog) (TBC/LysM-associated domain-containing protein 1) (TLD domain-containing protein 1)	MEAK7 KIAA1609 TLDC1	1.24836	1.5456	0.931742	0.534305		0.502867	0.881004	0.952367	1.06092	-0.0884703		0.26253		1
Q53SF7	Cordon-bleu protein-like 1	COBLL1 KIAA0977		1.51552		1.02539				0.575511		-1.36263				1
Q9NZ01	Very-long-chain enoyl-CoA reductase (EC 1.3.1.93) (Synaptic glycoprotein SC2) (Trans-2,3-enoyl-CoA reductase) (TER)	TECR GPSN2 SC2	0.936127	1.08759	0.781724	-0.165369		0.293322	1.19773	0.818355	1.23405	0.197512		0.168261		1
Q9P0K1	Disintegrin and metalloproteinase domain-containing protein 22 (ADAM 22) (Metalloproteinase-disintegrin ADAM22-3) (Metalloproteinase-like, disintegrin-like, and cysteine-rich protein 2)	ADAM22 MDC2		1.92038		1.60933				1.04323		0.104383				1
O43318	Mitogen-activated protein kinase kinase kinase 7 (EC 2.7.11.25) (Transforming growth factor-beta-activated kinase 1) (TGF-beta-activated kinase 1)	MAP3K7 TAK1	1.44027	1.44106	1.22436	0.773837	+	1.53602	1.23714	1.28844	1.28424	0.589369	+	2.52788		1
Q9Y4D7	Plexin-D1	PLXND1 KIAA0620		1.1662	1.03655	0.238148		0.451034		0.84657	1.23677	0.100686		0.0346948		1
Q8ND76	Cyclin-Y (Cyc-Y) (Cyclin box protein 1) (Cyclin fold protein 1) (cyclin-X)	CCNY C10orf9 CBCP1 CFP1		1.35024		0.740584				1.14392		0.331624				1
Q96QD8	Sodium-coupled neutral amino acid symporter 2 (Amino acid transporter A2) (Protein 40-9-1) (Solute carrier family 38 member 2) (System A amino acid transporter 2) (System A transporter 1) (System N amino acid transporter 2)	SLC38A2 ATA2 KIAA1382 SAT2 SNAT2	1.369	0.642503		0.0141396		0.0491297	1.0406	1.07544		0.139096		0.74178		1
Q9H0X4	Protein FAM234A (Protein ITFG3)	FAM234A C16orf9 ITFG3	1.12208	1.46818		0.63782		0.5024	1.02689	1.1069		0.159699		0.471937		1
Q9UBM7	7-dehydrocholesterol reductase (7-DHC reductase) (EC 1.3.1.21) (Delta7-sterol reductase) (Sterol Delta(7)-reductase) (Sterol reductase SR-2)	DHCR7 D7SR	0.79019	1.04303	0.792283	-0.328853		0.580184	1.20785	0.895206	1.11012	0.169301		0.247695		1
Q96N66	Lysophospholipid acyltransferase 7 (LPLAT 7) (EC 2.3.1.-) (1-acylglycerophosphatidylinositol O-acyltransferase) (Bladder and breast carcinoma-overexpressed gene 1 protein) (Leukocyte receptor cluster member 4) (Lysophosphatidylinositol acyltransferase) (LPIAT) (Lyso-PI acyltransferase) (Membrane-bound O-acyltransferase domain-containing protein 7) (O-acyltransferase domain-containing protein 7) (…	MBOAT7 BB1 LENG4 OACT7	1.01892	1.29724	0.743142	0.0482721		0.0115013	1.13376	0.927008	0.884882	-0.0450932		0.107561		1
Q13217	DnaJ homolog subfamily C member 3 (Endoplasmic reticulum DNA J domain-containing protein 6) (ER-resident protein ERdj6) (ERdj6) (Interferon-induced, double-stranded RNA-activated protein kinase inhibitor) (Protein kinase inhibitor of 58 kDa) (Protein kinase inhibitor p58)	DNAJC3 P58IPK PRKRI	1.01857	2.59889		1.46159		0.311814	1.02862	1.02145		0.0609846		1.048		1
P01857	Immunoglobulin heavy constant gamma 1 (Ig gamma-1 chain C region) (Ig gamma-1 chain C region EU) (Ig gamma-1 chain C region KOL) (Ig gamma-1 chain C region NIE)	IGHG1		1.27772		0.604429				10.1897		5.72523				1
O75915	PRA1 family protein 3 (ADP-ribosylation factor-like protein 6-interacting protein 5) (ARL-6-interacting protein 5) (Aip-5) (Cytoskeleton-related vitamin A-responsive protein) (Dermal papilla-derived protein 11) (GTRAP3-18) (Glutamate transporter EAAC1-interacting protein) (JM5) (Prenylated Rab acceptor protein 2) (Protein JWa) (Putative MAPK-activating protein PM27)	ARL6IP5 DERP11 JWA PRA2 PRAF3 HSPC127		1.44451		0.907036				0.858494		-0.376297				1
Q96QA5	Gasdermin-A (Gasdermin-1) [Cleaved into: Gasdermin-A, N-terminal (GSDMA-NT); Gasdermin-A, C-terminal (GSDMA-CT)]	GSDMA GSDM GSDM1 FKSG9		3.03523		2.73831				4.88149		3.9102				1
Q8NBM4	Ubiquitin-associated domain-containing protein 2 (UBA domain-containing protein 2) (Phosphoglycerate dehydrogenase-like protein 1)	UBAC2 PHGDHL1 PSEC0110	1.15663	1.21587	0.767586	0.112559		0.0568807	0.928284	0.789793	1.86612	0.438809		0.136471		1
P05387	60S acidic ribosomal protein P2 (Large ribosomal subunit protein P2) (Renal carcinoma antigen NY-REN-44)	RPLP2 D11S2243E RPP2	1.10899	1.38178	1.12451	0.460108		0.901697	1.09127	1.41592	1.05336	0.422483		0.650094		1
P23458	Tyrosine-protein kinase JAK1 (EC 2.7.10.2) (Janus kinase 1) (JAK-1)	JAK1 JAK1A JAK1B	0.989738	1.28143	1.10604	0.292097		0.567758	0.956707	1.01534	1.04782	0.0162817		0.0728185		1
P47929	Galectin-7 (Gal-7) (HKL-14) (PI7) (p53-induced gene 1 protein)	LGALS7 PIG1; LGALS7B		2.34771		2.10484				2.74031		2.4862				1
P84095	Rho-related GTP-binding protein RhoG	RHOG ARHG	0.825263	0.836904	1.04896	-0.249709		0.521419	1.1127	1.14659	0.95175	0.167667		0.421502		1
Q9P253	Vacuolar protein sorting-associated protein 18 homolog (hVPS18)	VPS18 KIAA1475	1.15446	1.24567	1.16538	0.425919	+	1.72606	0.880875	0.77457	0.772133	-0.522161	+	1.41018		1
P61803	Dolichyl-diphosphooligosaccharide--protein glycosyltransferase subunit DAD1 (Oligosaccharyl transferase subunit DAD1) (Defender against cell death 1) (DAD-1)	DAD1	0.93448	0.948544	0.562696	-0.503799		0.509709	0.989021	0.908705	1.77356	0.49802		0.270234		1
Q04912	Macrophage-stimulating protein receptor (MSP receptor) (EC 2.7.10.1) (CDw136) (Protein-tyrosine kinase 8) (p185-Ron) (CD antigen CD136) [Cleaved into: Macrophage-stimulating protein receptor alpha chain; Macrophage-stimulating protein receptor beta chain]	MST1R PTK8 RON	0.836924	0.748335		-0.573168		0.825612	0.786667	0.949787		-0.348494		0.437277		1
Q9BXI6	TBC1 domain family member 10A (EBP50-PDX interactor of 64 kDa) (EPI64 protein) (Rab27A-GAP-alpha)	TBC1D10A EPI64 TBC1D10		1.49925		0.998766				0.938583		-0.156324				1
P19634	Sodium/hydrogen exchanger 1 (APNH) (Na(+)/H(+) antiporter, amiloride-sensitive) (Na(+)/H(+) exchanger 1) (NHE-1) (Solute carrier family 9 member 1)	SLC9A1 APNH1 NHE1	1.00058	1.25471	1.01547	0.213114		0.416206	1.1282	0.802757	1.07786	0.0072312		0.0237453		1
Q9H3K2	Growth hormone-inducible transmembrane protein (Dermal papilla-derived protein 2) (Mitochondrial morphology and cristae structure 1) (MICS1) (Transmembrane BAX inhibitor motif-containing protein 5)	GHITM DERP2 MICS1 TMBIM5 My021 UNQ244/PRO281	0.874062	0.872659	0.68358	-0.519397		0.931139	0.996309	0.837661	1.42462	0.203923		0.126369		1
Q9UHA4	Ragulator complex protein LAMTOR3 (Late endosomal/lysosomal adaptor and MAPK and MTOR activator 3) (MEK-binding partner 1) (Mp1) (Mitogen-activated protein kinase kinase 1-interacting protein 1) (Mitogen-activated protein kinase scaffold protein 1)	LAMTOR3 MAP2K1IP1 MAPKSP1 PRO2783	1.01895	1.26559	1.22005	0.383413		0.815856	1.00763	0.880651	0.742142	-0.324235		0.59131		1
Q9BT22	Chitobiosyldiphosphodolichol beta-mannosyltransferase (EC 2.4.1.142) (Asparagine-linked glycosylation protein 1 homolog) (Beta-1,4-mannosyltransferase) (GDP-Man:GlcNAc2-PP-dolichol mannosyltransferase) (GDP-mannose-dolichol diphosphochitobiose mannosyltransferase) (Mannosyltransferase-1) (MT-1) (hMat-1)	ALG1 HMAT1 HMT1 PSEC0061 UNQ861/PRO1870	1.20484	1.20191		0.456595	+	2.37848	1.01297	0.780651		-0.268602		0.273184		1
Q4G0F5	Vacuolar protein sorting-associated protein 26B (Vesicle protein sorting 26B)	VPS26B		1.54019		1.06521				0.835794		-0.442387				1
P46977	Dolichyl-diphosphooligosaccharide--protein glycosyltransferase subunit STT3A (Oligosaccharyl transferase subunit STT3A) (STT3-A) (EC 2.4.99.18) (B5) (Integral membrane protein 1) (Transmembrane protein TMC)	STT3A ITM1 TMC	1.00706	0.967696	0.683571	-0.298216		0.413552	1.15086	0.72707	1.40267	0.220525		0.0917335		1
A4D1P6	WD repeat-containing protein 91	WDR91 HSPC049	1.01919	1.21538	0.860335	0.0768117		0.0699145	0.82423	0.796007	0.895323	-0.434357	+	1.43711		1
Q92685	Dol-P-Man:Man(5)GlcNAc(2)-PP-Dol alpha-1,3-mannosyltransferase (EC 2.4.1.258) (Asparagine-linked glycosylation protein 3 homolog) (Dol-P-Man-dependent alpha(1-3)-mannosyltransferase) (Dolichyl-P-Man:Man(5)GlcNAc(2)-PP-dolichyl mannosyltransferase) (Dolichyl-phosphate-mannose--glycolipid alpha-mannosyltransferase) (Not56-like protein)	ALG3 NOT NOT56L	1.09487	1.39345	0.894874	0.296469		0.298732	1.1293	0.582696	1.32458	0.0298832		0.0593673		1
P18564	Integrin beta-6	ITGB6		1.33621		0.714821				0.770264		-0.64376				1
Q5JTJ3	Cytochrome c oxidase assembly factor 6 homolog	COA6 C1orf31		2.39063		2.14953				1.38527		0.803762				1
Q15257	Serine/threonine-protein phosphatase 2A activator (EC 5.2.1.8) (PP2A, subunit B', PR53 isoform) (Phosphotyrosyl phosphatase activator) (PTPA) (Serine/threonine-protein phosphatase 2A regulatory subunit 4) (Serine/threonine-protein phosphatase 2A regulatory subunit B')	PTPA PPP2R4	1.35815	1.17012	1.07824	0.454118		0.930938	0.605432	0.844486	1.35527	-0.165593		0.185006		1
Q6UWP8	Suprabasin	SBSN UNQ698/PRO1343		1.5938		1.14959				6.28878		4.53496				1
P57678	Gem-associated protein 4 (Gemin-4) (Component of gems 4) (p97)	GEMIN4	1.09279	0.919158	0.7642	-0.191253		0.31588	0.998743	0.527196	1.28299	-0.162305		0.173701		1
Q9P2D3	HEAT repeat-containing protein 5B	HEATR5B KIAA1414 p200 p200a	1.13227	1.01626	0.636056	-0.183765		0.210286	0.968257	0.616463	1.45973	0.036276		0.0601531		1
O95248	Myotubularin-related protein 5 (Inactive phosphatidylinositol 3-phosphatase 5) (SET-binding factor 1) (Sbf1)	SBF1 MTMR5	1.54176	1.22124	1.37095	0.790748	+	1.37223	0.889832	0.989945	0.846212	-0.236225		0.773638		1
Q9NRF2	SH2B adapter protein 1 (Pro-rich, PH and SH2 domain-containing signaling mediator) (PSM) (SH2 domain-containing protein 1B)	SH2B1 KIAA1299 SH2B	1.33755	1.49503		0.858382		0.99402	0.894299	0.808897		-0.396188		0.718162		1
Q92696	Geranylgeranyl transferase type-2 subunit alpha (EC 2.5.1.60) (Geranylgeranyl transferase type II subunit alpha) (Rab geranyl-geranyltransferase subunit alpha) (Rab GG transferase alpha) (Rab GGTase alpha) (Rab geranylgeranyltransferase subunit alpha)	RABGGTA	1.15154	1.17759	0.73749	0.0541697		4.57699e-05	0.96123	1.01038	1.53604	0.385567		0.33314		1
Q9NZT1	Calmodulin-like protein 5 (Calmodulin-like skin protein)	CALML5 CLSP		0.933699		-0.169191				8.85304		5.37842				1
Q5BJD5	Transmembrane protein 41B (Protein stasimon)	TMEM41B KIAA0033		0.780176		-0.612223				0.575604		-1.36223				1
P55268	Laminin subunit beta-2 (Laminin B1s chain) (Laminin-11 subunit beta) (Laminin-14 subunit beta) (Laminin-15 subunit beta) (Laminin-3 subunit beta) (Laminin-4 subunit beta) (Laminin-7 subunit beta) (Laminin-9 subunit beta) (S-laminin subunit beta) (S-LAM beta)	LAMB2 LAMS	0.943061	1.11366	1.24924	0.239513		0.416938	0.866168	0.703178	0.888335	-0.491766		0.95968		1
Q9Y6I9	Testis-expressed protein 264 (Putative secreted protein Zsig11)	TEX264 ZSIG11 UNQ337/PRO536	1.04843	1.00858	0.871664	-0.0593424		0.169666	1.1581	0.970365	1.31523	0.340184		0.556427		1
Q96S97	Myeloid-associated differentiation marker (Protein SB135)	MYADM UNQ553/PRO1110		1.48928	0.80773	0.341484		0.0897542		0.65059	1.23853	-0.140667		0.100198		1
Q8NEB9	Phosphatidylinositol 3-kinase catalytic subunit type 3 (PI3-kinase type 3) (PI3K type 3) (PtdIns-3-kinase type 3) (EC 2.7.1.137) (Phosphatidylinositol 3-kinase p100 subunit) (Phosphoinositide-3-kinase class 3) (hVps34)	PIK3C3 VPS34	0.91401	1.10041	0.891057	-0.0789557		0.195165	0.786557	0.887108	1.28503	-0.0341957		0.0817114		1
Q9C0E8	Endoplasmic reticulum junction formation protein lunapark (ER junction formation factor lunapark)	LNPK KIAA1715 LNP	1.04613	1.1337	0.878701	0.0476575		0.0596318	1.15058	1.24237	1.35454	0.548689	+	1.36772		1
Q07812	Apoptosis regulator BAX (Bcl-2-like protein 4) (Bcl2-L-4)	BAX BCL2L4		1.02488	0.621666	-0.479621		0.273371		0.838241	1.65046	0.53917		0.145357		1
Q96KP1	Exocyst complex component 2 (Exocyst complex component Sec5)	EXOC2 SEC5 SEC5L1	1.08068	1.20101	0.93542	0.172322		0.331419	0.864102	0.766003	1.11648	-0.217659		0.337327		1
O95833	Chloride intracellular channel protein 3	CLIC3	0.307943	0.352605		-2.73225	+	1.41132	1.07825	1.36478		0.493489		0.457556		1
P52306	Rap1 GTPase-GDP dissociation stimulator 1 (Exchange factor smgGDS) (SMG GDS protein) (SMG P21 stimulatory GDP/GTP exchange protein)	RAP1GDS1 SMGGDS	1.16943	0.957861	0.762328	-0.0924546		0.147711	0.786174	0.972535	1.21008	-0.025791		0.0683412		1
Q6NUM9	All-trans-retinol 13,14-reductase (EC 1.3.99.23) (All-trans-13,14-dihydroretinol saturase) (RetSat) (PPAR-alpha-regulated and starvation-induced gene protein)	RETSAT PPSIG UNQ439/PRO872	1.00675	0.883237	0.462334	-0.599833		0.464405	0.959602	0.978499	1.35319	0.228543		0.261072		1
Q7Z2K6	Endoplasmic reticulum metallopeptidase 1 (EC 3.4.-.-) (Felix-ina)	ERMP1 FXNA KIAA1815	1.09317	1.23634	0.737304	0.0543212		0.0023188	1.00792	0.750855	1.82669	0.439681		0.142807		1
Q8TCT9	Minor histocompatibility antigen H13 (EC 3.4.23.-) (Intramembrane protease 1) (IMP-1) (IMPAS-1) (hIMP1) (Presenilin-like protein 3) (Signal peptide peptidase)	HM13 H13 IMP1 PSL3 SPP MSTP086	1.23143	1.24553	0.775129	0.19899		0.126417	0.968823	0.717695	1.92668	0.458687		0.113232		1
Q8TB37	Iron-sulfur protein NUBPL (IND1 homolog) (Nucleotide-binding protein-like) (huInd1)	NUBPL C14orf127	0.871392	1.12704	1.19521	0.154272		0.195699	1.05853	1.11873	0.919092	0.0779639		0.169334		1
Q9Y3E7	Charged multivesicular body protein 3 (Chromatin-modifying protein 3) (Neuroendocrine differentiation factor) (Vacuolar protein sorting-associated protein 24) (hVps24)	CHMP3 CGI149 NEDF VPS24 CGI-149	1.16832	1.37948		0.597054		0.671102	1.04899	1.56084		0.656381		0.364645		1
Q5W0U4	B box and SPRY domain-containing protein	BSPRY	1.08321	1.14622	0.774033	0.0028453		0.0344323	1.01019	1.37447	0.880755	0.209084		0.179859		1
Q14573	Inositol 1,4,5-trisphosphate receptor type 3 (IP3 receptor isoform 3) (IP3R 3) (InsP3R3) (Type 3 inositol 1,4,5-trisphosphate receptor) (Type 3 InsP3 receptor)	ITPR3	1.39257	1.51604	1.05572	0.687424		0.871766	0.91328	0.912833	1.32722	0.122941		0.0903668		1
P33527	Multidrug resistance-associated protein 1 (EC 7.6.2.2) (ATP-binding cassette sub-family C member 1) (Glutathione-S-conjugate-translocating ATPase ABCC1) (EC 7.6.2.3) (Leukotriene C(4) transporter) (LTC4 transporter)	ABCC1 MRP MRP1	0.956848	1.07426	0.642281	-0.284279		0.329701	1.07144	0.81918	1.21063	0.0818638		0.0570317		1
Q15800	Methylsterol monooxygenase 1 (EC 1.14.18.9) (C-4 methylsterol oxidase) (Sterol-C4-methyl oxidase)	MSMO1 DESP4 ERG25 SC4MOL	1.0262	1.25117		0.320318		0.369736	1.4702	0.898677		0.417468		0.172536		1
P25098	Beta-adrenergic receptor kinase 1 (Beta-ARK-1) (EC 2.7.11.15) (G-protein coupled receptor kinase 2)	GRK2 ADRBK1 BARK BARK1	1.06567	1.27091	1.22161	0.420848		1.05588	0.897237	0.978098	1.122	-0.0021951		0.0249994		1
P27448	MAP/microtubule affinity-regulating kinase 3 (EC 2.7.11.1) (C-TAK1) (cTAK1) (Cdc25C-associated protein kinase 1) (ELKL motif kinase 2) (EMK-2) (Protein kinase STK10) (Ser/Thr protein kinase PAR-1) (Par-1a) (Serine/threonine-protein kinase p78)	MARK3 CTAK1 EMK2	0.886538	0.861009	0.848863	-0.356338	+	2.11239	0.951384	0.929088	1.1412	0.017753		0.013911		1
P12931	Proto-oncogene tyrosine-protein kinase Src (EC 2.7.10.2) (Proto-oncogene c-Src) (pp60c-src) (p60-Src)	SRC SRC1	1.33907	1.06786	1.11028	0.392278		0.800844	0.941987	1.14787	1.05098	0.113151		0.272724		1
P00387	NADH-cytochrome b5 reductase 3 (B5R) (Cytochrome b5 reductase) (EC 1.6.2.2) (Diaphorase-1)	CYB5R3 DIA1	1.0392	1.14954	0.802266	-0.00741139		0.0424583	0.981633	0.901501	1.4282	0.243522		0.196402		1
Q8NHH9	Atlastin-2 (EC 3.6.5.-) (ADP-ribosylation factor-like protein 6-interacting protein 2) (ARL-6-interacting protein 2) (Aip-2)	ATL2 ARL6IP2	1.02692	1.10066	0.708238	-0.138806		0.192318	0.906586	0.67344	1.31613	-0.0868797		0.12903		1
Q16678	Cytochrome P450 1B1 (EC 1.14.14.1) (CYPIB1) (Hydroperoxy icosatetraenoate dehydratase) (EC 4.2.1.152)	CYP1B1	0.912766	0.839705	0.547019	-0.655851		0.679361	0.79996	0.802246	1.02138	-0.330662		0.649331		1
Q6UWP7	Lysocardiolipin acyltransferase 1 (EC 2.3.1.-) (1-acylglycerol-3-phosphate O-acyltransferase 8) (1-AGP acyltransferase 8) (1-AGPAT 8) (EC 2.3.1.51) (Acyl-CoA:lysocardiolipin acyltransferase 1)	LCLAT1 AGPAT8 ALCAT1 LYCAT UNQ1849/PRO3579		0.885828		-0.298996				0.560732		-1.42678				1
Q6DD88	Atlastin-3 (EC 3.6.5.-)	ATL3	0.979052	1.06502	0.785755	-0.144028		0.267654	0.957362	0.861182	1.55065	0.286244		0.157823		1
Q92876	Kallikrein-6 (EC 3.4.21.-) (Neurosin) (Protease M) (SP59) (Serine protease 18) (Serine protease 9) (Zyme)	KLK6 PRSS18 PRSS9	0.89914	1.06813	0.878719	-0.129982		0.341635	1.05756	1.0374	0.956057	0.0415936		0.181735		1
O00469	Procollagen-lysine,2-oxoglutarate 5-dioxygenase 2 (EC 1.14.11.4) (Lysyl hydroxylase 2) (LH2)	PLOD2	0.815001	0.921497	1.04828	-0.183605		0.412221	1.75584	1.55569	1.058	0.927438		0.834096		1
Q13835	Plakophilin-1 (Band 6 protein) (B6P)	PKP1		2.37427	0.590199	0.970615		0.0712901		3.2522	3.87704	3.13481	+	1.35582		1
Q96P63	Serpin B12	SERPINB12		1.90003		1.58305				11.5247		6.02885				1
Q14739	Delta(14)-sterol reductase LBR (Delta-14-SR) (EC 1.3.1.70) (3-beta-hydroxysterol Delta (14)-reductase) (C-14 sterol reductase) (C14SR) (Integral nuclear envelope inner membrane protein) (LMN2R) (Lamin-B receptor) (Sterol C14-reductase)	LBR	1.01432	1.04373	0.681926	-0.223596		0.290708	1.08716	0.812569	1.20273	0.0828191		0.0558255		1
A0FGR8	Extended synaptotagmin-2 (E-Syt2) (Chr2Syt)	ESYT2 FAM62B KIAA1228	1.03337	0.973944	0.729547	-0.226411		0.357154	1.04248	0.96363	1.24441	0.197806		0.367681		1
O00584	Ribonuclease T2 (EC 4.6.1.19) (Ribonuclease 6)	RNASET2 RNASE6PL	0.947827	0.981371	1.1318	0.0496419		0.106766	1.01111	1.13879	0.973065	0.0990774		0.294699		1
Q96JJ7	Protein disulfide-isomerase TMX3 (EC 5.3.4.1) (Thioredoxin domain-containing protein 10) (Thioredoxin-related transmembrane protein 3)	TMX3 KIAA1830 TXNDC10			14.6143	6.61462					0.701707	-0.873662				1
Q16363	Laminin subunit alpha-4 (Laminin-14 subunit alpha) (Laminin-8 subunit alpha) (Laminin-9 subunit alpha)	LAMA4			3.8977	3.35513					1.0074	0.0181942				1
P37108	Signal recognition particle 14 kDa protein (SRP14) (18 kDa Alu RNA-binding protein)	SRP14	0.718839	0.759977	2.71011	0.823331		0.101665	1.1636	1.12039	0.99182	0.216915		0.662621		1
P37198	Nuclear pore glycoprotein p62 (62 kDa nucleoporin) (Nucleoporin Nup62)	NUP62	1.26432	1.09909	1.14278	0.384536		1.17981	0.921775	1.13733	2.13006	0.823471		0.399394		1
Q9ULF5	Zinc transporter ZIP10 (Solute carrier family 39 member 10) (Zrt- and Irt-like protein 10) (ZIP-10)	SLC39A10 KIAA1265 ZIP10			0.828046	-0.46536					1.05612	0.134671				1
O43264	Centromere/kinetochore protein zw10 homolog	ZW10	1.15652	0.999375	1.04195	0.157506		0.53789	0.828572	0.879754	1.00241	-0.250066		0.690498		1
Q9H1K0	Rabenosyn-5 (110 kDa protein) (FYVE finger-containing Rab5 effector protein rabenosyn-5) (RAB effector RBSN) (Zinc finger FYVE domain-containing protein 20)	RBSN ZFYVE20			1.74446	1.37236					0.992313	-0.0190311				1
Q7Z4F1	Low-density lipoprotein receptor-related protein 10 (LRP-10)	LRP10 MSTP087 SP220 UNQ389/PRO724			0.483164	-1.79399					1.55666	1.09144				1
Q9H5N1	Rab GTPase-binding effector protein 2 (Rabaptin-5beta)	RABEP2 RABPT5B	0.98607	1.02694	2.08375	0.768462		0.383772	1.08459	0.834008	0.786233	-0.255437		0.432426		1
O60826	Coiled-coil domain-containing protein 22	CCDC22 CXorf37 JM1	1.14335	0.869352	1.20759	0.174756		0.214531	0.822931	0.803214	1.02904	-0.301135		0.61112		1
Q96T58	Msx2-interacting protein (SMART/HDAC1-associated repressor protein) (SPEN homolog)	SPEN KIAA0929 MINT SHARP	1.10158	1.44973	1.84776	0.944051		0.862828	1.082	1.36059	1.0012	0.340256		0.529687		1
P46779	60S ribosomal protein L28 (Large ribosomal subunit protein eL28)	RPL28	0.714323	1.01837	2.87439	1.058		0.210599	0.932684	0.557562	0.437133	-1.09122		0.802334		1
Q8NFF5	FAD synthase (EC 2.7.7.2) (FAD pyrophosphorylase) (FMN adenylyltransferase) (Flavin adenine dinucleotide synthase) [Includes: Molybdenum cofactor biosynthesis protein-like region; FAD synthase region]	FLAD1 PP591	1.25723	1.28406	1.56728	0.775561	+	1.32023	0.935487	0.80725	0.928542	-0.286227		0.878111		1
Q562E7	WD repeat-containing protein 81	WDR81	0.990019	1.02454	1.0915	0.0856895		0.447125	0.795223	0.764745	0.820422	-0.570574	+	2.1188		1
Q9BXP2	Solute carrier family 12 member 9 (Cation-chloride cotransporter 6) (hCCC6) (Cation-chloride cotransporter-interacting protein 1) (CCC-interacting protein 1) (hCIP1) (Potassium-chloride transporter 9) (WO3.3)	SLC12A9 CCC6 CIP1	1.22058	1.16076	1.07331	0.348024		1.18839	0.890718	0.681257	1.17932	-0.213437		0.256219		1
O14880	Microsomal glutathione S-transferase 3 (Microsomal GST-3) (Glutathione peroxidase MGST3) (EC 1.11.1.-) (LTC4 synthase MGST3) (EC 4.4.1.20) (Microsomal glutathione S-transferase III) (Microsomal GST-III)	MGST3	1.01892	0.983343	0.908441	-0.0745227		0.344043	0.807209	0.634117	0.950016	-0.559253		0.751275		1
O00515	Ladinin-1 (Lad-1) (Linear IgA disease antigen) (LADA)	LAD1 LAD	1.25615	1.17231	1.50105	0.66566		1.15761	0.971593	1.22592	0.814091	0.00952381		0.0274001		1
Q9NWT6	Hypoxia-inducible factor 1-alpha inhibitor (EC 1.14.11.30) (EC 1.14.11.n4) (Factor inhibiting HIF-1) (FIH-1) (Hypoxia-inducible factor asparagine hydroxylase)	HIF1AN FIH1	1.35203		1.59335	0.954678		0.872205	0.975727		0.916825	-0.136192		0.488852		1
P13688	Carcinoembryonic antigen-related cell adhesion molecule 1 (Biliary glycoprotein 1) (BGP-1) (CD antigen CD66a)	CEACAM1 BGP BGP1			2.01695	1.73033					1.09094	0.214671				1
P53985	Monocarboxylate transporter 1 (MCT 1) (Solute carrier family 16 member 1)	SLC16A1 MCT1			0.921126	-0.202628					1.01797	0.0439197				1
Q7L7X3	Serine/threonine-protein kinase TAO1 (EC 2.7.11.1) (Kinase from chicken homolog B) (hKFC-B) (MARK Kinase) (MARKK) (Prostate-derived sterile 20-like kinase 2) (PSK-2) (PSK2) (Prostate-derived STE20-like kinase 2) (Thousand and one amino acid protein kinase 1) (TAOK1) (hTAOK1)	TAOK1 KIAA1361 MAP3K16 MARKK	0.836431	0.833238	1.22565	-0.087594		0.14186	0.924091	1.02704	1.02843	-0.0168592		0.0752584		1
O75128	Protein cordon-bleu	COBL KIAA0633	0.532276	0.527221	0.776207	-1.21141		1.24038	0.90488	0.859243	0.867096	-0.323493	+	1.8412		1
Q96SW2	Protein cereblon	CRBN AD-006		1.15957	1.11321	0.315331		0.996208		0.925393	1.17308	0.118532		0.103551		1
Q96AX1	Vacuolar protein sorting-associated protein 33A (hVPS33A)	VPS33A	1.21631		0.807183	0.0287985		0.0125691	0.718209		1.35026	0.0830194		0.0136458		1
Q9NUQ7	Ufm1-specific protease 2 (UfSP2) (EC 3.4.22.-)	UFSP2 C4orf20	1.20572	1.29455	0.856254	0.27695		0.277593	0.945253	1.03878	1.14992	0.107734		0.260686		1
P18077	60S ribosomal protein L35a (Cell growth-inhibiting gene 33 protein) (Large ribosomal subunit protein eL33)	RPL35A GIG33	1.54936	0.786899	3.83849	1.78031		0.421403	0.595971	0.351706	0.319304	-2.12589	+	1.36349		1
Q8N392	Rho GTPase-activating protein 18 (MacGAP) (Rho-type GTPase-activating protein 18)	ARHGAP18	0.707873	0.660149	1.18159	-0.4012		0.405036	0.822123	0.892439	1.07797	-0.176745		0.364047		1
Q96AT9	Ribulose-phosphate 3-epimerase (EC 5.1.3.1) (Ribulose-5-phosphate-3-epimerase)	RPE HUSSY-17	1.13478	1.12882	1.1053	0.28603	+	2.32071	0.875712	0.906902	0.886629	-0.288107	+	2.11969		1
P78417	Glutathione S-transferase omega-1 (GSTO-1) (EC 2.5.1.18) (Glutathione S-transferase omega 1-1) (GSTO 1-1) (Glutathione-dependent dehydroascorbate reductase) (EC 1.8.5.1) (Monomethylarsonic acid reductase) (MMA(V) reductase) (EC 1.20.4.2) (S-(Phenacyl)glutathione reductase) (SPG-R)	GSTO1 GSTTLP28	1.28474	1.25919	1.31562	0.621358	+	2.59823	0.928968	1.22886	1.1629	0.250504		0.41487		1
Q969H4	Connector enhancer of kinase suppressor of ras 1 (Connector enhancer of KSR 1) (CNK homolog protein 1) (CNK1) (hCNK1) (Connector enhancer of KSR-like)	CNKSR1 CNK1			0.940479	-0.151347					1.05851	0.140235				1
Q96RU3	Formin-binding protein 1 (Formin-binding protein 17) (hFBP17)	FNBP1 FBP17 KIAA0554	0.781345	0.759746	0.981557	-0.427418		0.805072	1.05557	0.99243	0.920732	-0.0258401		0.102664		1
Q13501	Sequestosome-1 (EBI3-associated protein of 60 kDa) (EBIAP) (p60) (Phosphotyrosine-independent ligand for the Lck SH2 domain of 62 kDa) (Ubiquitin-binding protein p62)	SQSTM1 ORCA OSIL	1.30071	1.19642	1.17221	0.496709	+	1.61437	1.28206	1.14793	1.122	0.416545		1.25453		1
Q9UNH7	Sorting nexin-6 (TRAF4-associated factor 2) [Cleaved into: Sorting nexin-6, N-terminally processed]	SNX6	0.995296	0.94948	1.16231	0.0865014		0.180752	0.958819	0.896485	1.04614	-0.0823803		0.291347		1
Q9NZM3	Intersectin-2 (SH3 domain-containing protein 1B) (SH3P18) (SH3P18-like WASP-associated protein)	ITSN2 KIAA1256 SH3D1B SWAP	0.877836	1.00094	1.09589	-0.0209133		0.063983	0.795383	0.84351	1.29694	-0.0533217		0.101317		1
Q9UJM3	ERBB receptor feedback inhibitor 1 (Mitogen-inducible gene 6 protein) (MIG-6)	ERRFI1 MIG6	1.36572	1.43151	2.4307	1.36979		0.971889	1.17216	1.7258	0.843894	0.544976		0.319277		1
P37837	Transaldolase (EC 2.2.1.2)	TALDO1 TAL TALDO TALDOR	1.26324	1.2154	1.21459	0.512714	+	2.41075	1.03831	1.35031	1.20065	0.4423		0.824685		1
Q9UEY8	Gamma-adducin (Adducin-like protein 70)	ADD3 ADDL	1.02728	1.32146	1.41132	0.556943		0.81105	0.990508	0.732396	0.961489	-0.274148		0.471447		1
Q96P70	Importin-9 (Imp9) (Ran-binding protein 9) (RanBP9)	IPO9 IMP9 KIAA1192 RANBP9 HSPC273	1.4998	1.22532	0.831702	0.419906		0.301433	0.887944	0.875788	1.24815	0.00975139		0.0271191		1
O14939	Phospholipase D2 (PLD 2) (hPLD2) (EC 3.1.4.4) (Choline phosphatase 2) (PLD1C) (Phosphatidylcholine-hydrolyzing phospholipase D2)	PLD2	0.855282	0.917026	0.495175	-0.690422		0.607225	0.853592	0.902508	1.46071	0.17209		0.0762418		1
O94804	Serine/threonine-protein kinase 10 (EC 2.7.11.1) (Lymphocyte-oriented kinase)	STK10 LOK	1.12079	1.32556	1.3923	0.607971		1.17881	0.986625	0.690188	0.867787	-0.40605		0.628268		1
P51617	Interleukin-1 receptor-associated kinase 1 (IRAK-1) (EC 2.7.11.1)	IRAK1 IRAK	1.14128	1.06093	1.13584	0.263345	+	1.33813	0.944928	1.17927	1.19972	0.252874		0.474843		1
Q9UI12	V-type proton ATPase subunit H (V-ATPase subunit H) (Nef-binding protein 1) (NBP1) (Protein VMA13 homolog) (V-ATPase 50/57 kDa subunits) (Vacuolar proton pump subunit H) (Vacuolar proton pump subunit SFD)	ATP6V1H CGI-11	1.08915		1.01233	0.12207		0.387966	0.925891		0.952897	-0.154195		0.842703		1
Q9UBC2	Epidermal growth factor receptor substrate 15-like 1 (Eps15-related protein) (Eps15R)	EPS15L1 EPS15R	1.20153	1.33663	1.45352	0.704381	+	1.44406	1.03816	0.907981	0.960117	-0.0782936		0.316778		1
O43237	Cytoplasmic dynein 1 light intermediate chain 2 (Dynein light intermediate chain 2, cytosolic) (LIC-2) (LIC53/55)	DYNC1LI2 DNCLI2 LIC2	0.9921	1.00681	1.21015	0.166141		0.369591	0.986924	0.886929	0.90028	-0.193048		0.852114		1
P00403	Cytochrome c oxidase subunit 2 (EC 7.1.1.9) (Cytochrome c oxidase polypeptide II)	MT-CO2 COII COX2 COXII MTCO2	1.63002	1.28824	0.955625	0.630501		0.565742	1.17346	1.16671	1.97679	0.897584		0.703234			1
Q9BSQ5	Cerebral cavernous malformations 2 protein (Malcavernin)	CCM2 C7orf22 PP10187	1.01167		0.974691	-0.0168721		0.113147	0.87313		1.18872	0.0751191		0.0345176			1
Q6ZN28	Metastasis-associated in colon cancer protein 1 (SH3 domain-containing protein 7a5)	MACC1	1.10292	1.19743		0.345065		0.737599	1.17428	0.942136		0.139531		0.138956			1
Q9P013	Spliceosome-associated protein CWC15 homolog	CWC15 C11orf5 AD-002 HSPC148	1.03274	1.39807	1.26633	0.515324		0.816073	1.11734	1.00657	0.884518	0.0069158		0.00797338			1
P56378	ATP synthase subunit ATP5MJ, mitochondrial (6.8 kDa mitochondrial proteolipid protein) (MLQ) (ATP synthase membrane subunit 6.8PL)	ATP5MJ ATP5MPL C14orf2 MP68 PRO1574	0.718346			-0.815862			1.45473			0.924428					1
Q9Y4W6	AFG3-like protein 2 (EC 3.4.24.-) (Paraplegin-like protein)	AFG3L2	1.35448	1.18626	0.852978	0.30413		0.280185	1.02707	1.07171	1.27862	0.292247		0.635445			1
Q6FI81	Anamorsin (Cytokine-induced apoptosis inhibitor 1) (Fe-S cluster assembly protein DRE2 homolog)	CIAPIN1 CUA001 PRO0915	1.99227	1.92009	1.24474	1.33615		1.12539	0.922154	1.0683	0.992312	-0.014209		0.0579713			1
O43708	Maleylacetoacetate isomerase (MAAI) (EC 5.2.1.2) (GSTZ1-1) (Glutathione S-transferase zeta 1) (EC 2.5.1.18)	GSTZ1 MAAI	1.22475	1.01562	0.926659	0.13363		0.206044	0.957118	1.12965	1.09157	0.142419		0.410818			1
Q9NVV4	Poly(A) RNA polymerase, mitochondrial (PAP) (EC 2.7.7.19) (PAP-associated domain-containing protein 1) (Polynucleotide adenylyltransferase) (Terminal uridylyltransferase 1) (TUTase 1) (mtPAP)	MTPAP PAPD1	1.00468	0.84724		-0.189717		0.285729	1.15697	0.937851		0.11424		0.116951			1
O75489	NADH dehydrogenase [ubiquinone] iron-sulfur protein 3, mitochondrial (EC 7.1.1.2) (Complex I-30kD) (CI-30kD) (NADH-ubiquinone oxidoreductase 30 kDa subunit)	NDUFS3	0.972475	0.802137	0.770589	-0.405467		0.847757	0.952072	1.19489	1.04661	0.154215		0.32751			1
Q6P161	39S ribosomal protein L54, mitochondrial (L54mt) (MRP-L54) (Mitochondrial large ribosomal subunit protein mL54)	MRPL54	1.32293			0.690184			1.03199			0.0776593					1
P82673	28S ribosomal protein S35, mitochondrial (MRP-S35) (S35mt) (28S ribosomal protein S28, mitochondrial) (MRP-S28) (S28mt) (Mitochondrial small ribosomal subunit protein mS35)	MRPS35 MRPS28 HDCMD11P MDS023 PSEC0213	0.981056	0.896883	1.02626	-0.0800454		0.317905	1.06721	1.09456	1.01802	0.143544		0.947493			1
P42126	Enoyl-CoA delta isomerase 1, mitochondrial (EC 5.3.3.8) (3,2-trans-enoyl-CoA isomerase) (Delta(3),Delta(2)-enoyl-CoA isomerase) (D3,D2-enoyl-CoA isomerase) (Dodecenoyl-CoA isomerase)	ECI1 DCI	1.12194	1.03573	0.831457	-0.00895117		0.0410353	1.00652	1.15288	1.17541	0.260949		0.774445			1
Q96Q83	Alpha-ketoglutarate-dependent dioxygenase alkB homolog 3 (EC 1.14.11.33) (EC 1.14.11.54) (Alkylated DNA repair protein alkB homolog 3) (hABH3) (DEPC-1) (Prostate cancer antigen 1)	ALKBH3 ABH3 DEPC1	1.61385	1.54112		1.12422	+	1.49227	1.42316	1.29284		0.754719		1.00238			1
P50583	Bis(5'-nucleosyl)-tetraphosphatase [asymmetrical] (EC 3.6.1.17) (Diadenosine 5',5'''-P1,P4-tetraphosphate asymmetrical hydrolase) (Ap4A hydrolase) (Ap4Aase) (Diadenosine tetraphosphatase) (Nucleoside diphosphate-linked moiety X motif 2) (Nudix motif 2)	NUDT2 APAH1	1.39243	1.094	1.3107	0.581146		1.06431	1.34707	2.7192	1.87538	1.68541		1.06078			1
Q9NZJ7	Mitochondrial carrier homolog 1 (Presenilin-associated protein)	MTCH1 PSAP CGI-64 UNQ1871/PRO4314	1.12152	1.23664	1.12575	0.36882	+	1.36318	0.919491	0.751519	0.998865	-0.287523		0.551126			1
P23434	Glycine cleavage system H protein, mitochondrial (Lipoic acid-containing protein)	GCSH	1.23429	1.76931	1.5644	1.03699		1.2176	1.22664	1.2381	0.836043	0.235648		0.221086			1
Q9BYC8	39S ribosomal protein L32, mitochondrial (L32mt) (MRP-L32) (Mitochondrial large ribosomal subunit protein bL32m)	MRPL32 HSPC283	1.01543	0.691038	0.937119	-0.311929		0.449128	1.72884	1.24494	0.96635	0.672319		0.546396			1
Q5T160	Probable arginine--tRNA ligase, mitochondrial (EC 6.1.1.19) (Arginyl-tRNA synthetase) (ArgRS)	RARS2 RARSL	1.66652	1.2337	1.09133	0.704294		0.781271	0.958898	1.15616	1.26258	0.292415		0.521266			1
Q86W56	Poly(ADP-ribose) glycohydrolase (EC 3.2.1.143)	PARG	1.19304	0.884811		0.0941835		0.0525903	0.688231	0.448053		-1.39441		0.65227			1
Q4U2R6	39S ribosomal protein L51, mitochondrial (L51mt) (MRP-L51) (Mitochondrial large ribosomal subunit protein mL51) (bMRP-64) (bMRP64)	MRPL51 MRP64 CDA09 HSPC241	0.750403	0.89527		-0.480923		0.575308	0.922832	0.965769		-0.141346		0.620741			1
O14925	Mitochondrial import inner membrane translocase subunit Tim23	TIMM23 TIM23	1.14827	0.749391	1.22245	0.0968242		0.0349762	0.992608	1.47376	1.0439	0.387406		0.427503			1
Q9Y6C9	Mitochondrial carrier homolog 2 (Met-induced mitochondrial protein)	MTCH2 MIMP HSPC032	1.28898	1.12874	0.852922	0.213022		0.211612	1.12678	0.990777	1.24112	0.278536		0.624073			1
Q9NUJ1	Palmitoyl-protein thioesterase ABHD10, mitochondrial (EC 3.1.2.22) (Acyl-protein thioesterase ABHD10) (Alpha/beta hydrolase domain-containing protein 10) (Abhydrolase domain-containing protein 10) (Mycophenolic acid acyl-glucuronide esterase, mitochondrial) (EC 3.1.1.93)	ABHD10	1.37767	1.56592	1.45473	0.94363	+	2.02947	1.05029	1.26202	1.27451	0.44061		0.963176			1
P14635	G2/mitotic-specific cyclin-B1	CCNB1 CCNB	1.49353		1.45837	0.960133	+	1.71048	0.826714		1.45683	0.326989		0.0979482			1
Q9Y2W6	Tudor and KH domain-containing protein (Tudor domain-containing protein 2)	TDRKH TDRD2		6.16969	1.38286	3.27707		0.411427		1.00606	0.823177	-0.220108		0.284187			1
Q5ST30	Valine--tRNA ligase, mitochondrial (EC 6.1.1.9) (Valyl-tRNA synthetase) (ValRS) (Valyl-tRNA synthetase-like)	VARS2 KIAA1885 VARS2L VARSL	1.41345	4.86038		2.81957		0.440289	0.745112	0.705331		-0.792369		1.26628			1
Q8TAA5	GrpE protein homolog 2, mitochondrial (Mt-GrpE#2)	GRPEL2		0.897439	1.29858	0.230598		0.124953		2.03248	1.14747	1.14367		0.422463			1
Q9HD33	39S ribosomal protein L47, mitochondrial (L47mt) (MRP-L47) (Mitochondrial large ribosomal subunit protein uL29m) (Nasopharyngeal carcinoma metastasis-related protein 1)	MRPL47 NCM1 CGI-204	0.841591	1.2356	1.00381	0.0657066		0.0413072	0.985365	1.15163	0.949499	0.0700996		0.145742			1
O95140	Mitofusin-2 (EC 3.6.5.-) (Transmembrane GTPase MFN2)	MFN2 CPRP1 KIAA0214	0.859748	1.66652	0.977443	0.382793		0.197058	0.991261	0.841923	0.739624	-0.37886		0.703143			1
Q9Y3D5	28S ribosomal protein S18c, mitochondrial (MRP-S18-c) (Mrps18-c) (S18mt-c) (28S ribosomal protein S18-1, mitochondrial) (MRP-S18-1) (Mitochondrial small ribosomal subunit protein bS18c) (Mitochondrial small ribosomal subunit protein bS18m)	MRPS18C CGI-134	1.05385	0.866571	1.28338	0.162094		0.163295	1.03235	1.49264	0.719746	0.193407		0.0531116			1
P28288	ATP-binding cassette sub-family D member 3 (EC 3.1.2.-) (EC 7.6.2.-) (70 kDa peroxisomal membrane protein) (PMP70)	ABCD3 PMP70 PXMP1	1.05603	0.963112	0.866448	-0.0958978		0.269408	0.986489	0.944219	1.26626	0.156832		0.215855			1
P22033	Methylmalonyl-CoA mutase, mitochondrial (MCM) (EC 5.4.99.2) (Methylmalonyl-CoA isomerase)	MMUT MUT	1.19719	0.969901	0.898684	0.0534874		0.053674	0.974476	1.02072	1.7305	0.534301		0.367229			1
Q9Y234	Lipoyltransferase 1, mitochondrial (EC 2.3.1.-) (Lipoate biosynthesis protein) (Lipoate-protein ligase) (Lipoyl ligase)	LIPT1		1.39481	1.00425	0.448695		0.308136		1.05563	0.869508	-0.0940949		0.133624			1
Q9Y6H1	Coiled-coil-helix-coiled-coil-helix domain-containing protein 2 (Aging-associated gene 10 protein) (HCV NS2 trans-regulated protein) (NS2TP)	CHCHD2 C7orf17 AAG10	0.950093	2.12194	1.68768	1.13838		0.638651	1.39289	1.92886	1.28413	1.05736		1.09718			1
O43772	Mitochondrial carnitine/acylcarnitine carrier protein (Carnitine/acylcarnitine translocase) (CAC) (CACT) (Solute carrier family 25 member 20)	SLC25A20 CAC CACT	1.35036	1.84327		1.15425		0.679131	1.0268	0.854372		-0.151062		0.217528			1
Q9Y276	Mitochondrial chaperone BCS1 (h-BCS1) (BCS1-like protein)	BCS1L BCS1		1.26068		0.571323				0.708289		-0.850635					1
Q96DA6	Mitochondrial import inner membrane translocase subunit TIM14 (DnaJ homolog subfamily C member 19)	DNAJC19 TIM14 TIMM14	0.903529	2.00617		0.924621		0.227595	1.42389	1.52699		0.959285		1.24305			1
P30837	Aldehyde dehydrogenase X, mitochondrial (EC 1.2.1.3) (Aldehyde dehydrogenase 5) (Aldehyde dehydrogenase family 1 member B1)	ALDH1B1 ALDH5 ALDHX	0.885121	1.66912	1.62975	0.820426		0.532106	0.951458	0.688104	0.807945	-0.501997		0.820093			1
Q63ZY3	KN motif and ankyrin repeat domain-containing protein 2 (Ankyrin repeat domain-containing protein 25) (Matrix-remodeling-associated protein 3) (SRC-1-interacting protein) (SIP) (SRC-interacting protein) (SRC1-interacting protein)	KANK2 ANKRD25 KIAA1518 MXRA3 SIP	0.771074	0.844256	1.01273	-0.326452		0.647196	1.07709	0.928632	0.844373	-0.126427		0.292502			1
Q9H1K4	Mitochondrial glutamate carrier 2 (GC-2) (Glutamate/H(+) symporter 2) (Solute carrier family 25 member 18)	SLC25A18 GC2		1.34412		0.729376				0.927118		-0.186636					1
P82914	28S ribosomal protein S15, mitochondrial (MRP-S15) (S15mt) (Mitochondrial small ribosomal subunit protein uS15m)	MRPS15 RPMS15 DC37	0.962685	0.917246	1.12976	0.00795432		0.00392419	1.43202	1.77525	1.18328	0.939273		1.05282			1
Q9UMS0	NFU1 iron-sulfur cluster scaffold homolog, mitochondrial (HIRA-interacting protein 5)	NFU1 HIRIP5 CGI-33	1.03471	1.51848	0.979876	0.403373		0.391188	0.888869	1.23537	1.02237	0.117677		0.139594			1
Q14790	Caspase-8 (CASP-8) (EC 3.4.22.61) (Apoptotic cysteine protease) (Apoptotic protease Mch-5) (CAP4) (FADD-homologous ICE/ced-3-like protease) (FADD-like ICE) (FLICE) (ICE-like apoptotic protease 5) (MORT1-associated ced-3 homolog) (MACH) [Cleaved into: Caspase-8 subunit p18; Caspase-8 subunit p10]	CASP8 MCH5	1.28688	1.60171	1.14025	0.727225		0.98574	0.837987	0.95647	1.19837	-0.0059003		0.041231			1
Q92934	Bcl2-associated agonist of cell death (BAD) (Bcl-2-binding component 6) (Bcl-2-like protein 8) (Bcl2-L-8) (Bcl-xL/Bcl-2-associated death promoter) (Bcl2 antagonist of cell death)	BAD BBC6 BCL2L8	0.736608	1.64322		0.428846		0.0699413	1.33083	2.63194		1.68645		0.498693			1
Q9NX46	ADP-ribosylhydrolase ARH3 (ADP-ribose glycohydrolase ARH3) (ADP-ribosylhydrolase 3) (O-acetyl-ADP-ribose deacetylase ARH3) (EC 3.5.1.-) (Poly(ADP-ribose) glycohydrolase ARH3) (EC 3.2.1.143) ([Protein ADP-ribosylarginine] hydrolase-like protein 2) ([Protein ADP-ribosylserine] hydrolase) (EC 3.2.2.-)	ADPRS ADPRHL2 ARH3		0.893682	1.3448	0.27783		0.136159		1.35262	1.1743	0.576753		0.724069			1
Q9Y305	Acyl-coenzyme A thioesterase 9, mitochondrial (Acyl-CoA thioesterase 9) (EC 3.1.2.-) (Acyl-CoA thioester hydrolase 9)	ACOT9 CGI-16	1.22075	1.21103	1.257	0.50974	+	2.52388	1.00303	1.1202	2.05095	0.814636		0.472101			1
Q8NBN7	Retinol dehydrogenase 13 (EC 1.1.1.300) (Short chain dehydrogenase/reductase family 7C member 3)	RDH13 SDR7C3 PSEC0082 UNQ736/PRO1430	1.08435	1.23595	1.30957	0.470038		1.10596	1.2131	1.22608	1.28285	0.531879	+	2.20247			1
P78549	Endonuclease III-like protein 1 (hNTH1) (EC 3.2.2.-) (EC 4.2.99.18) (Bifunctional DNA N-glycosylase/DNA-(apurinic or apyrimidinic site) lyase) (DNA glycosylase/AP lyase)	NTHL1 NTH1 OCTS3	1.33333	1.15991	0.898111	0.302412		0.352826	0.790701	0.885703	0.963959	-0.314937		0.823901			1
P53701	Holocytochrome c-type synthase (EC 4.4.1.17) (Cytochrome c-type heme lyase)	HCCS CCHL	0.882262	0.870815	0.968261	-0.240436		1.00837	1.09088	1.09345	1.17143	0.276392	+	1.38513			1
Q6NVY1	3-hydroxyisobutyryl-CoA hydrolase, mitochondrial (EC 3.1.2.4) (3-hydroxyisobutyryl-coenzyme A hydrolase) (HIB-CoA hydrolase) (HIBYL-CoA-H)	HIBCH	1.01603	1.17107	1.23496	0.324645		0.799892	1.18007	1.11638	1.07139	0.28525		1.26302			1
O95563	Mitochondrial pyruvate carrier 2 (Brain protein 44)	MPC2 BRP44			1.07395	0.175947					1.30165	0.650199					1
Q8N573	Oxidation resistance protein 1	OXR1 Nbla00307	1.14655	1.16536	1.37745	0.510133		1.13058	0.782415	0.762187	0.85175	-0.554091	+	1.6706			1
Q7L3T8	Probable proline--tRNA ligase, mitochondrial (EC 6.1.1.15) (Prolyl-tRNA synthetase) (ProRS)	PARS2	0.99182	1.06121	1.034	0.070535		0.540024	0.836334	0.965826	0.847137	-0.306606		0.955703			1
O75438	NADH dehydrogenase [ubiquinone] 1 beta subcomplex subunit 1 (Complex I-MNLL) (CI-MNLL) (NADH-ubiquinone oxidoreductase MNLL subunit)	NDUFB1			0.864804	-0.358236					1.03736	0.0904528					1
Q8IY18	Structural maintenance of chromosomes protein 5 (SMC protein 5) (SMC-5) (hSMC5)	SMC5 KIAA0594 SMC5L1	8.82089	0.891564		3.89741		0.27284	1.11176	0.962592		0.0900255		0.142721				1
P02795	Metallothionein-2 (MT-2) (Metallothionein-2A) (Metallothionein-II) (MT-II)	MT2A CES1 MT2	1.59514	4.49944	1.79735	2.38548		0.915846	1.40696	1.60439	1.78368	1.15662	+	1.67466				1
Q8NAX2	Keratinocyte differentiation factor 1	KDF1 C1orf172	1.94682			1.64305			1.22727			0.505078						1
Q0VDF9	Heat shock 70 kDa protein 14 (HSP70-like protein 1) (Heat shock protein HSP60)	HSPA14 HSP60 HSP70L1	1.06139	1.04523	0.922398	0.0237405		0.056138	1.43265	1.19154	1.07002	0.513376		0.84605				1
Q969T9	WW domain-binding protein 2 (WBP-2)	WBP2	0.924966	1.04824	1.12543	0.0797876		0.178952	1.51084	0.920354	1.45883	0.640756		0.556153				1
O60925	Prefoldin subunit 1	PFDN1 PFD1	1.52232			1.03643			1.63772			1.21664						1
Q9BRA0	N-alpha-acetyltransferase 38, NatC auxiliary subunit (LSM domain-containing protein 1) (Phosphonoformate immuno-associated protein 2)	NAA38 LSMD1 MAK31 PFAAP2	2.19303	4.85848		3.10778		0.685142	1.095	1.16002		0.295983		0.822005				1
Q9H9F9	Actin-related protein 5 (hARP5) (Sarcoma antigen NY-SAR-16)	ACTR5 ARP5	2.56567			2.3238			0.850438			-0.399551						1
Q68DC2	Ankyrin repeat and SAM domain-containing protein 6 (Ankyrin repeat domain-containing protein 14) (SamCystin) (Sterile alpha motif domain-containing protein 6) (SAM domain-containing protein 6)	ANKS6 ANKRD14 PKDR1 SAMD6	1.42842	1.1734	2.04347	1.07837		0.895011	0.845613	1.02779	1.17667	0.0408298		0.0245688				1
Q7L1Q6	eIF5-mimic protein 2 (Basic leucine zipper and W2 domain-containing protein 1) (Protein Orf)	BZW1 5MP2 BZAP45 KIAA0005	1.33926		0.813067	0.181027		0.0494463	1.32808		1.4704	0.828508		1.01728				1
Q00587	Cdc42 effector protein 1 (Binder of Rho GTPases 5) (Serum protein MSE55)	CDC42EP1 BORG5 CEP1 MSE55	1.34693	1.32022	1.9403	1.0582		1.09206	1.04507	1.00108	1.08164	0.10288		0.684054				1
P49674	Casein kinase I isoform epsilon (CKI-epsilon) (CKIe) (EC 2.7.11.1)	CSNK1E	1.62853	1.3104	1.82117	1.13859	+	1.36954	1.26041	1.54294	1.14714	0.678797		1.03471				1
Q9P021	Cysteine-rich PDZ-binding protein (Cysteine-rich interactor of PDZ three) (Cysteine-rich interactor of PDZ3)	CRIPT HSPC139	1.63663	0.695924	1.9584	0.882685		0.309519	0.926036	0.50649	0.931882	-0.587189		0.514745				1
Q8IVM0	Coiled-coil domain-containing protein 50 (Protein Ymer)	CCDC50 C3orf6	2.41606	3.14823	1.75063	2.19822	+	1.43706	0.907536	0.951869	1.18293	0.034562		0.0279979				1
Q9P2G1	Ankyrin repeat and IBR domain-containing protein 1 (EC 2.3.2.31)	ANKIB1 KIAA1386	1.18033			0.408905			0.840551			-0.42839						1
Q8IWV8	E3 ubiquitin-protein ligase UBR2 (EC 2.3.2.27) (N-recognin-2) (RING-type E3 ubiquitin transferase UBR2) (Ubiquitin-protein ligase E3-alpha-2) (Ubiquitin-protein ligase E3-alpha-II)	UBR2 C6orf133 KIAA0349	1.19079			0.430669			0.855617			-0.384577						1
Q96RG2	PAS domain-containing serine/threonine-protein kinase (PAS-kinase) (PASKIN) (hPASK) (EC 2.7.11.1)	PASK KIAA0135	1.40209	1.30687	1.58681	0.885447	+	1.61087	0.849922	0.712505	0.784019	-0.605995	+	1.40175				1
P78318	Immunoglobulin-binding protein 1 (B-cell signal transduction molecule alpha 4) (Protein alpha-4) (CD79a-binding protein 1) (Protein phosphatase 2/4/6 regulatory subunit) (Renal carcinoma antigen NY-REN-16)	IGBP1 IBP1	0.903355	1.23847	1.2031	0.268411		0.367553	1.02831	1.08213	0.943701	0.0441114		0.141032				1
Q9NPH2	Inositol-3-phosphate synthase 1 (IPS 1) (EC 5.5.1.4) (Myo-inositol 1-phosphate synthase) (MI-1-P synthase) (MIP synthase) (hIPS) (Myo-inositol 1-phosphate synthase A1) (hINO1)	ISYNA1 INO1	0.929813	0.893338	0.712158	-0.415071		0.770556	0.800296	0.821781	1.1943	-0.155777		0.224048				1
Q9Y6E2	eIF5-mimic protein 1 (Basic leucine zipper and W2 domain-containing protein 2)	BZW2 5MP1 HSPC028 MSTP017	1.4952	1.34969	0.933818	0.56915		0.556678	1.06276	0.971584	1.69132	0.534278		0.40625				1
P51812	Ribosomal protein S6 kinase alpha-3 (S6K-alpha-3) (EC 2.7.11.1) (90 kDa ribosomal protein S6 kinase 3) (p90-RSK 3) (p90RSK3) (Insulin-stimulated protein kinase 1) (ISPK-1) (MAP kinase-activated protein kinase 1b) (MAPK-activated protein kinase 1b) (MAPKAP kinase 1b) (MAPKAPK-1b) (Ribosomal S6 kinase 2) (RSK-2) (pp90RSK2)	RPS6KA3 ISPK1 MAPKAPK1B RSK2	1.20409	0.994255	0.899759	0.0793619		0.0973418	0.965254	0.977619	1.23987	0.145832		0.231946				1
Q9C0E2	Exportin-4 (Exp4)	XPO4 KIAA1721	1.18407			0.416711			0.928674			-0.1825						1
O75030	Microphthalmia-associated transcription factor (Class E basic helix-loop-helix protein 32) (bHLHe32)	MITF BHLHE32	0.784906	1.05911		-0.20027		0.188282	0.811515	0.829527		-0.487874	+	1.4525				1
Q96BJ3	Axin interactor, dorsalization-associated protein (Axin interaction partner and dorsalization antagonist)	AIDA C1orf80	1.26916	1.23669	1.24293	0.549536	+	2.89747	1.29337	1.21083	0.954597	0.350981		0.547668				1
Q8WUN7	Ubiquitin domain-containing protein 2 (Dendritic cell-derived ubiquitin-like protein) (DC-UbP) (Ubiquitin-like protein SB72)	UBTD2 DCUBP SB72	1.18732			0.423471			1.00078			0.00191368						1
P46734	Dual specificity mitogen-activated protein kinase kinase 3 (MAP kinase kinase 3) (MAPKK 3) (EC 2.7.12.2) (MAPK/ERK kinase 3) (MEK 3) (Stress-activated protein kinase kinase 2) (SAPK kinase 2) (SAPKK-2) (SAPKK2)	MAP2K3 MEK3 MKK3 PRKMK3 SKK2	1.4731	1.55395	1.20987	0.851423	+	1.33032	1.00797	1.21218	1.22832	0.343599		0.774689				1
Q7Z4G4	tRNA (guanine(10)-N2)-methyltransferase homolog (EC 2.1.1.-) (tRNA guanosine-2'-O-methyltransferase TRM11 homolog)	TRMT11 C6orf75 MDS024	1.54014	1.67837		1.17339		1.24065	0.968982	0.949873		-0.10215		0.823767				1
Q99622	Protein C10	C12orf57 C10	1.44578	1.28117		0.764646		0.909155	1.01262	1.19159		0.239778		0.342424				1
Q92636	Protein FAN (Factor associated with neutral sphingomyelinase activation) (Factor associated with N-SMase activation)	NSMAF FAN	1.33407			0.710865			0.772693			-0.635993						1
O00471	Exocyst complex component 5 (Exocyst complex component Sec10) (hSec10)	EXOC5 SEC10 SEC10L1	1.10931	0.974905	0.922699	0.00567657		0.004013	1.10514	0.962066	1.08302	0.120514		0.408426				1
Q9HAV4	Exportin-5 (Exp5) (Ran-binding protein 21)	XPO5 KIAA1291 RANBP21	1.29105	1.03473	0.650653	-0.0194537		0.0765004	0.969178	0.892183	1.6597	0.394982		0.222489				1
Q07617	Sperm-associated antigen 1 (HSD-3.8) (Infertility-related sperm protein Spag-1)	SPAG1	1.00988	0.995955	1.01905	0.0203754		0.464723	0.904498	0.895435	0.998956	-0.171136		0.743738				1
Q86YL5	Testis development-related protein (Protein INM01)	TDRP C8orf42	1.37658			0.788228			0.948268			-0.131007						1
P28702	Retinoic acid receptor RXR-beta (Nuclear receptor subfamily 2 group B member 2) (Retinoid X receptor beta)	RXRB NR2B2	1.04522	1.1553	1.11479	0.246473		1.11109	1.25846	1.01105	1.02062	0.227681		0.459563				1
P52294	Importin subunit alpha-5 (Karyopherin subunit alpha-1) (Nucleoprotein interactor 1) (NPI-1) (RAG cohort protein 2) (SRP1-beta) [Cleaved into: Importin subunit alpha-5, N-terminally processed]	KPNA1 RCH2	1.47494			0.958456			0.771729			-0.639074						1
Q9UET6	Putative tRNA (cytidine(32)/guanosine(34)-2'-O)-methyltransferase (EC 2.1.1.205) (2'-O-ribose RNA methyltransferase TRM7 homolog) (Protein ftsJ homolog 1)	FTSJ1 JM23	0.991021	0.643529		-0.49765		0.312494	1.13844	1.55568		0.734771		0.497141				1
Q96BJ8	Engulfment and cell motility protein 3	ELMO3	1.03896	1.38587	2.98803	1.45552		0.580273	1.02655	0.725641	0.726986	-0.470287		0.661				1
Q53EZ4	Centrosomal protein of 55 kDa (Cep55) (Up-regulated in colon cancer 6)	CEP55 C10orf3 URCC6	1.06022	1.12543	1.44644	0.471545		0.707516	1.08194	0.883901	1.07827	0.0359979		0.0494663				1
Q9H074	Polyadenylate-binding protein-interacting protein 1 (PABP-interacting protein 1) (PAIP-1) (Poly(A)-binding protein-interacting protein 1)	PAIP1	1.39165	1.20062		0.63973		0.748833	0.838319	0.774317		-0.530939		0.936642				1
Q15814	Tubulin-specific chaperone C (Tubulin-folding cofactor C) (CFC)	TBCC	1.02527	0.812299		-0.208903		0.239529	1.01412	1.17177		0.219192		0.352788				1
O95983	Methyl-CpG-binding domain protein 3 (Methyl-CpG-binding protein MBD3)	MBD3	1.41386	0.847355		0.302748		0.105681	1.29496	1.26234		0.606227	+	1.48129				1
Q6PJG6	BRCA1-associated ATM activator 1 (BRCA1-associated protein required for ATM activation protein 1)	BRAT1 BAAT1 C7orf27	1.27532	0.982923	0.785721	0.0358805		0.0112442	0.793963	0.846235	1.61456	0.201017		0.0382518				1
Q6UWE0	E3 ubiquitin-protein ligase LRSAM1 (EC 2.3.2.27) (Leucine-rich repeat and sterile alpha motif-containing protein 1) (RING-type E3 ubiquitin transferase LRSAM1) (Tsg101-associated ligase) (hTAL)	LRSAM1 TAL UNQ6496/PRO21356	1.12467	1.01605	1.14475	0.224181		0.861503	0.944255	1.08282	0.929552	-0.0359201		0.119204				1
O15037	Protein KHNYN (KH and NYN domain-containing protein)	KHNYN KIAA0323	0.916454	0.789549	1.25043	-0.0360803		0.0817287	0.992057	1.38075	0.961679	0.260705		0.291944				1
Q9H000	E3 ubiquitin-protein ligase makorin-2 (EC 2.3.2.27) (RING finger protein 62) (RING-type E3 ubiquitin transferase makorin-2)	MKRN2 RNF62 HSPC070	1.12262	1.24322	1.41584	0.571091		1.11093	1.17853	1.26421	0.81587	0.203935		0.168063				1
Q96F86	Enhancer of mRNA-decapping protein 3 (LSM16 homolog) (YjeF N-terminal domain-containing protein 2) (YjeF_N2) (hYjeF_N2) (YjeF domain-containing protein 1)	EDC3 LSM16 YJDC YJEFN2 PP844	0.995495	1.02075	1.18786	0.162333		0.427623	1.08646	1.32795	0.918704	0.259689		0.327119				1
Q8N5H3	Leucine repeat adapter protein 25	FAM89B Lrap25	1.00252	1.32047	1.13828	0.35274		0.641833	1.09725	1.27663	1.22794	0.450908		1.23909				1
P08397	Porphobilinogen deaminase (PBG-D) (EC 2.5.1.61) (Hydroxymethylbilane synthase) (HMBS) (Pre-uroporphyrinogen synthase)	HMBS PBGD UPS	2.18567		0.750913	0.94731		0.140523	1.13538		1.21084	0.393769		0.896188				1
Q5T5P2	Sickle tail protein homolog	KIAA1217 SKT	1.84312	2.35587	2.10708	1.83222	+	2.04003	0.978431	0.929641	0.810349	-0.243081		0.672605				1
O60869	Endothelial differentiation-related factor 1 (EDF-1) (Multiprotein-bridging factor 1) (MBF1)	EDF1	1.35548	1.05014	1.42437	0.602395		0.885922	1.6562	2.22285	1.17652	1.28711		0.931131				1
Q92990	Glomulin (FK506-binding protein-associated protein) (FAP) (FKBP-associated protein)	GLMN FAP48 FAP68 VMGLOM	1.4379			0.895718			0.887718			-0.293738						1
Q9NR50	Translation initiation factor eIF-2B subunit gamma (eIF-2B GDP-GTP exchange factor subunit gamma)	EIF2B3	1.60033	1.16681	1.09659	0.624024		0.74955	0.872188	1.05983	1.18049	0.0908087		0.111416				1
Q96T76	MMS19 nucleotide excision repair protein homolog (hMMS19) (MET18 homolog) (MMS19-like protein)	MMS19 MMS19L	1.12602	1.2013	0.723731	0.0416156		0.0138688	0.979802	0.799607	1.47943	0.204109		0.0908601				1
Q9H9Q2	COP9 signalosome complex subunit 7b (SGN7b) (Signalosome subunit 7b) (JAB1-containing signalosome subunit 7b)	COPS7B CSN7B	1.60478	1.34731		0.960294		0.847786	0.834389	0.962854		-0.263631		0.433219				1
P15374	Ubiquitin carboxyl-terminal hydrolase isozyme L3 (UCH-L3) (EC 3.4.19.12) (Ubiquitin thioesterase L3)	UCHL3	1.06018	1.0578	0.982863	0.0815383		0.492137	1.31748	1.0732	1.4379	0.601487		0.950041				1
Q96GG9	DCN1-like protein 1 (DCNL1) (DCUN1 domain-containing protein 1) (Defective in cullin neddylation protein 1-like protein 1) (Squamous cell carcinoma-related oncogene)	DCUN1D1 DCN1 DCUN1L1 RP42 SCCRO	1.3004	1.18111	0.78173	0.207434		0.134413	0.992816	0.951297	1.38696	0.258177		0.27649				1
Q8N8N7	Prostaglandin reductase 2 (PRG-2) (EC 1.3.1.48) (15-oxoprostaglandin 13-reductase) (Zinc-binding alcohol dehydrogenase domain-containing protein 1)	PTGR2 ZADH1	1.45268	1.34108		0.824341		1.11947	0.92226	1.27684		0.234057		0.152688				1
O00625	Pirin (EC 1.13.11.24) (Probable quercetin 2,3-dioxygenase PIR) (Probable quercetinase)	PIR	1.08391	1.36739	1.41812	0.627658		1.00549	1.24862	1.2025	1.19273	0.479517	+	2.28149				1
O95819	Mitogen-activated protein kinase kinase kinase kinase 4 (EC 2.7.11.1) (HPK/GCK-like kinase HGK) (MAPK/ERK kinase kinase kinase 4) (MEK kinase kinase 4) (MEKKK 4) (Nck-interacting kinase)	MAP4K4 HGK KIAA0687 NIK	1.30968	1.4142	1.67495	0.943914	+	1.45424	1.05971	0.852683	0.904805	-0.155056		0.387828				1
O75962	Triple functional domain protein (EC 2.7.11.1) (PTPRF-interacting protein)	TRIO	1.01137	1.18807	1.34065	0.408276		0.71911	1.11993	1.01989	1.19919	0.264056		0.809548				1
Q96PU8	KH domain-containing RNA-binding protein QKI (Protein quaking) (Hqk) (HqkI)	QKI HKQ	1.74371	2.52867	1.21339	1.48853		0.925514	1.04051	0.596127	0.999385	-0.318991		0.329889				1
P49770	Translation initiation factor eIF-2B subunit beta (S20I15) (S20III15) (eIF-2B GDP-GTP exchange factor subunit beta)	EIF2B2 EIF2BB	1.31199	1.02782	1.15509	0.376583		0.766772	0.922838	1.13835	1.42536	0.370689		0.40243				1
Q9H788	SH2 domain-containing protein 4A (Protein SH(2)A) (Protein phosphatase 1 regulatory subunit 38)	SH2D4A PPP1R38 SH2A	1.02563	0.810766	1.12236	-0.0341438		0.0785973	1.00387	0.999148	0.825462	-0.145198		0.364686				1
O76003	Glutaredoxin-3 (PKC-interacting cousin of thioredoxin) (PICOT) (PKC-theta-interacting protein) (PKCq-interacting protein) (Thioredoxin-like protein 2)	GLRX3 PICOT TXNL2 HUSSY-22	1.23869	1.31231	1.24687	0.581619	+	2.22543	0.936522	1.15614	1.03171	0.100189		0.217532				1
Q6KB66	Keratin, type II cytoskeletal 80 (Cytokeratin-80) (CK-80) (Keratin-80) (K80) (Type-II keratin Kb20)	KRT80 KB20	0.849148	0.835182		-0.423661	+	1.51285	1.03111	2.01847		1.04043		0.325832				1
Q3YEC7	Rab-like protein 6 (GTP-binding protein Parf) (Partner of ARF) (Rab-like protein 1) (RBEL1)	RABL6 C9orf86 PARF	1.01999	3.08678		1.77448		0.310849	0.899565	1.02325		-0.0970614		0.196442				1
P53350	Serine/threonine-protein kinase PLK1 (EC 2.7.11.21) (Polo-like kinase 1) (PLK-1) (Serine/threonine-protein kinase 13) (STPK13)	PLK1 PLK	1.16836	1.2041	1.34885	0.531394	+	1.40359	0.782898	1.11191	1.1505	0.0369705		0.00127032				1
Q9NXR7	BRISC and BRCA1-A complex member 2 (BRCA1-A complex subunit BRE) (BRCA1/BRCA2-containing complex subunit 45) (Brain and reproductive organ-expressed protein)	BABAM2 BRCC45 BRE	1.56406	2.77747		1.91159		0.624772	0.918616	0.564673		-0.737142		0.391338				1
Q5VVQ6	Ubiquitin thioesterase OTU1 (EC 3.4.19.12) (DUBA-8) (HIV-1-induced protease 7) (HIN-7) (HsHIN7) (OTU domain-containing protein 2)	YOD1 DUBA8 HIN7 OTUD2 PRO0907		1.54916		1.07953				1.9047		1.5891						1
Q13526	Peptidyl-prolyl cis-trans isomerase NIMA-interacting 1 (EC 5.2.1.8) (Peptidyl-prolyl cis-trans isomerase Pin1) (PPIase Pin1) (Rotamase Pin1)	PIN1	1.12557	1.00328	1.27406	0.310801		0.655821	0.911793	0.962967	1.02588	-0.0830687		0.383069				1
Q15493	Regucalcin (RC) (Gluconolactonase) (GNL) (EC 3.1.1.17) (Senescence marker protein 30) (SMP-30)	RGN SMP30	1.1175	1.22765	1.25684	0.451021	+	1.43261	0.920393	0.775982	2.57329	0.870413		0.19231				1
P24386	Rab proteins geranylgeranyltransferase component A 1 (Choroideremia protein) (Rab escort protein 1) (REP-1) (TCD protein)	CHM REP1 TCD		1.66108		1.25158				1.00918		0.0225318						1
Q8IZ21	Phosphatase and actin regulator 4	PHACTR4 PRO2963	0.958856	0.97392	1.29077	0.177256		0.232674	1.02914	1.17582	0.96855	0.13867		0.343827				1
P06746	DNA polymerase beta (EC 2.7.7.7) (EC 4.2.99.-)	POLB	1.40078	1.67212	1.59972	1.09284	+	1.84509	0.557784	1.12565	0.883139	-0.384843		0.356074				1
Q16637	Survival motor neuron protein (Component of gems 1) (Gemin-1)	SMN1 SMN SMNT; SMN2 SMNC	1.02137	1.10616	1.21231	0.264655		0.773677	1.03079	1.47493	1.34413	0.615148		0.804963				1
Q9BZZ5	Apoptosis inhibitor 5 (API-5) (Antiapoptosis clone 11 protein) (AAC-11) (Cell migration-inducing gene 8 protein) (Fibroblast growth factor 2-interacting factor) (FIF) (Protein XAGL)	API5 MIG8	1.23642	1.20411	0.761987	0.161111		0.0893327	1.13559	0.954366	1.48317	0.431177		0.465259				1
Q9Y2L5	Trafficking protein particle complex subunit 8 (Protein TRS85 homolog)	TRAPPC8 KIAA1012	1.1456	0.913072	0.989043	0.0389185		0.0553477	0.760717	0.83121	0.973609	-0.38584		0.81151				1
Q9BQG2	NAD-capped RNA hydrolase NUDT12 (DeNADding enzyme NUDT12) (EC 3.6.1.-) (NADH pyrophosphatase NUDT12) (EC 3.6.1.22) (Nucleoside diphosphate-linked moiety X motif 12) (Nudix motif 12)	NUDT12	1.12642	1.10436	1.13923	0.28684	+	2.21785	1.5178	1.26173	0.990144	0.563249		0.644393				1
Q14139	Ubiquitin conjugation factor E4 A (EC 2.3.2.27) (RING-type E3 ubiquitin transferase E4 A)	UBE4A KIAA0126	1.2626	1.12765		0.439621		0.705237	0.922857	0.839087		-0.312552		0.64437				1
Q15024	Exosome complex component RRP42 (Exosome component 7) (Ribosomal RNA-processing protein 42) (p8)	EXOSC7 KIAA0116 RRP42	1.67765	1.63672	0.974487	0.881475		0.687924	0.954464	0.94528	1.00959	-0.0756868		0.570722				1
Q15287	RNA-binding protein with serine-rich domain 1 (SR-related protein LDC2)	RNPS1 LDC2	0.89104	1.17668	1.32118	0.300626		0.345995	0.791852	0.724314	0.592146	-0.869926		1.27929				1
Q5JVF3	PCI domain-containing protein 2 (CSN12-like protein)	PCID2 HT004	1.12974	1.2266	0.929362	0.224357		0.383784	1.05752	0.937488	1.3186	0.245211		0.332028				1
Q15345	Leucine-rich repeat-containing protein 41 (Protein Muf1)	LRRC41 MUF1 PP7759	1.20061	1.02732	0.66102	-0.0930286		0.130792	0.900521	0.681403	1.24218	-0.149017		0.184481				1
Q13615	Myotubularin-related protein 3 (EC 3.1.3.48) (FYVE domain-containing dual specificity protein phosphatase 1) (FYVE-DSP1) (Phosphatidylinositol-3,5-bisphosphate 3-phosphatase) (EC 3.1.3.95) (Phosphatidylinositol-3-phosphate phosphatase) (EC 3.1.3.64) (Zinc finger FYVE domain-containing protein 10)	MTMR3 KIAA0371 ZFYVE10	1.10219		3.22535	1.90362		0.349474	0.896734		1.09834	-0.00608305		0.0211885				1
P55209	Nucleosome assembly protein 1-like 1 (NAP-1-related protein) (hNRP)	NAP1L1 NRP	0.740033	0.812553	0.806308	-0.592948	+	1.82199	0.946077	1.35412	0.899174	0.15869		0.125232				1
Q9NRG4	N-lysine methyltransferase SMYD2 (EC 2.1.1.-) (HSKM-B) (Histone methyltransferase SMYD2) (EC 2.1.1.354) (Lysine N-methyltransferase 3C) (SET and MYND domain-containing protein 2)	SMYD2 KMT3C			1.00202	0.00496645					0.670107	-0.987305						1
Q9BSJ2	Gamma-tubulin complex component 2 (GCP-2) (hGCP2) (Gamma-ring complex protein 103 kDa) (h103p) (hGrip103) (Spindle pole body protein Spc97 homolog) (hSpc97)	TUBGCP2 GCP2	1.02715	1.16467	0.692915	-0.0966259		0.137902	0.922446	0.827602	1.84582	0.44683		0.158814				1
O95155	Ubiquitin conjugation factor E4 B (EC 2.3.2.27) (Homozygously deleted in neuroblastoma 1) (RING-type E3 ubiquitin transferase E4 B) (Ubiquitin fusion degradation protein 2)	UBE4B HDNB1 KIAA0684 UFD2	1.00024	0.56261	1.14206	-0.255366		0.245947	0.63268	0.827526	1.12556	-0.366472		0.397364				1
Q8IWD4	Coiled-coil domain-containing protein 117	CCDC117	1.42888		1.44204	0.891528	+	2.09284	1.06972		1.49544	0.613799		0.404111				1
P41567	Eukaryotic translation initiation factor 1 (eIF1) (A121) (Protein translation factor SUI1 homolog) (Sui1iso1)	EIF1 SUI1	1.13093	1.10862	1.37028	0.456381		0.934437	1.07996	1.1692	1.04856	0.233359		0.989032				1
Q15052	Rho guanine nucleotide exchange factor 6 (Alpha-Pix) (COOL-2) (PAK-interacting exchange factor alpha) (Rac/Cdc42 guanine nucleotide exchange factor 6)	ARHGEF6 COOL2 KIAA0006 PIXA		1.0921	1.41473	0.557062		0.466373		1.08306	1.10757	0.224533		1.10845				1
P51843	Nuclear receptor subfamily 0 group B member 1 (DSS-AHC critical region on the X chromosome protein 1) (Nuclear receptor DAX-1)	NR0B1 AHC DAX1	0.656201		0.361955	-1.66513		0.602384	0.8462		1.59295	0.48957		0.143123				1
Q13136	Liprin-alpha-1 (LAR-interacting protein 1) (LIP-1) (Protein tyrosine phosphatase receptor type f polypeptide-interacting protein alpha-1) (PTPRF-interacting protein alpha-1)	PPFIA1 LIP1	1.04323	1.03067	1.08297	0.125704		1.11684	1.03539	0.91688	1.04259	-0.00423027		0.0259747				1
Q13371	Phosducin-like protein (PHLP)	PDCL PHLOP1 PhLP1	0.77536	0.988932	1.34993	0.0921597		0.0225533	1.08573	1.07764	1.03347	0.156739		1.2673				1
O43824	Putative GTP-binding protein 6 (Pseudoautosomal GTP-binding protein-like)	GTPBP6 PGPL	0.77048	0.816939	0.77033	-0.594144	+	2.18706	1.22786	1.00688	0.73777	-0.0226977		0.0678906				1
Q86X95	Corepressor interacting with RBPJ 1 (CBF1-interacting corepressor) (Recepin)	CIR1 CIR	1.29026	1.28411	0.792994	0.2849		0.200767	1.03106	0.752623	0.970225	-0.211097		0.366668				1
Q9NRH1	Protein YAE1 homolog (Yae1 domain-containing protein 1)	YAE1 C7orf36 YAE1D1 GK003			1.45233	0.920346					0.8659	-0.355113						1
P78560	Death domain-containing protein CRADD (Caspase and RIP adapter with death domain) (RIP-associated protein with a death domain)	CRADD RAIDD			1.32774	0.699136					0.966002	-0.0853077						1
Q16537	Serine/threonine-protein phosphatase 2A 56 kDa regulatory subunit epsilon isoform (PP2A B subunit isoform B'-epsilon) (PP2A B subunit isoform B56-epsilon) (PP2A B subunit isoform PR61-epsilon) (PP2A B subunit isoform R5-epsilon)	PPP2R5E	1.063	0.726106	0.48522	-0.682995		0.544983	0.843888	0.980607	1.69582	0.394453		0.188705				1
Q9BRP1	Programmed cell death protein 2-like	PDCD2L	0.991867	1.67497	1.58084	0.857681		0.717078	0.969521	1.26139	1.33129	0.423632		0.621491				1
P45985	Dual specificity mitogen-activated protein kinase kinase 4 (MAP kinase kinase 4) (MAPKK 4) (EC 2.7.12.2) (JNK-activating kinase 1) (MAPK/ERK kinase 4) (MEK 4) (SAPK/ERK kinase 1) (SEK1) (Stress-activated protein kinase kinase 1) (SAPK kinase 1) (SAPKK-1) (SAPKK1) (c-Jun N-terminal kinase kinase 1) (JNKK)	MAP2K4 JNKK1 MEK4 MKK4 PRKMK4 SEK1 SERK1 SKK1	0.975512	0.959431	0.862865	-0.172089		0.688289	0.978366	1.30417	1.24814	0.401703		0.6481				1
Q9BTT6	Leucine-rich repeat-containing protein 1 (LANO adapter protein) (LAP and no PDZ protein)	LRRC1 LANO	2.02421	1.38783	1.08322	0.9974		0.749385	0.775084	0.985449	1.53664	0.23295		0.0888688				1
Q9HA64	Ketosamine-3-kinase (EC 2.7.1.172) (Fructosamine-3-kinase-related protein) (FN3K-RP) (FN3K-related protein) (Protein-psicosamine 3-kinase FN3KRP) (EC 2.7.1.-)	FN3KRP	1.25707	1.13815	1.06719	0.353549		1.01059	1.20051	1.70772	1.53044	0.966155		1.17266				1
O00505	Importin subunit alpha-4 (Importin alpha Q2) (Qip2) (Karyopherin subunit alpha-3) (SRP1-gamma)	KPNA3 QIP2	1.53686	1.57171	0.661693	0.563633		0.195122	1.01202	1.63661	1.68983	0.909838		0.758357				1
Q9ULE6	Paladin	PALD1 KIAA1274 PALD	1.37273			0.781331			0.953081			-0.118518						1
Q9BZ29	Dedicator of cytokinesis protein 9 (Cdc42 guanine nucleotide exchange factor zizimin-1) (Zizimin-1)	DOCK9 KIAA1058 ZIZ1	1.11666	0.956232	1.04536	0.0953415		0.300637	0.939762	0.863061	1.18697	-0.00840905		0.042684				1
O75663	TIP41-like protein (Putative MAPK-activating protein PM10) (Type 2A-interacting protein) (TIP)	TIPRL	2.7448	1.3928	1.29995	1.46675		0.811665	0.916119	0.843736	1.05359	-0.158346		0.395981				1
Q9UHC7	E3 ubiquitin-protein ligase makorin-1 (EC 2.3.2.27) (RING finger protein 61) (RING-type E3 ubiquitin transferase makorin-1)	MKRN1 RNF61	1.06112			0.146315			1.23073			0.512018						1
Q69YH5	Cell division cycle-associated protein 2 (Recruits PP1 onto mitotic chromatin at anaphase protein) (Repo-Man)	CDCA2	2.77111	0.982575	1.32837	1.3		0.524945	0.890623	0.832008	0.877132	-0.353155	+	1.69878				1
Q8WU90	Zinc finger CCCH domain-containing protein 15 (DRG family-regulatory protein 1) (Likely ortholog of mouse immediate early response erythropoietin 4)	ZC3H15 DFRP1 LEREPO4 HSPC303 HT010 MSTP012 PP730	1.03099	1.1189	1.18978	0.264542		0.899663	0.819364	1.04502	1.13789	0.00186766		0.02789				1
Q9NVE7	4'-phosphopantetheine phosphatase (EC 3.1.3.-) (Inactive pantothenic acid kinase 4) (hPanK4)	PANK4	1.28301	0.8828		0.196438		0.0994845	0.958793	1.29629		0.296052		0.220158				1
Q86SQ7	Serologically defined colon cancer antigen 8 (Antigen NY-CO-8) (Centrosomal colon cancer autoantigen protein) (hCCCAP)	SDCCAG8 CCCAP NPHP10 HSPC085	1.40975			0.846963			0.948581			-0.130193						1
O15254	Peroxisomal acyl-coenzyme A oxidase 3 (EC 1.3.3.6) (Branched-chain acyl-CoA oxidase) (BRCACox) (Pristanoyl-CoA oxidase)	ACOX3 BRCOX PRCOX	1.28671	0.976405	1.06777	0.25804		0.454021	0.819242	0.805278	1.36812	-0.0060584		0.0643085				1
P30566	Adenylosuccinate lyase (ADSL) (ASL) (EC 4.3.2.2) (Adenylosuccinase) (ASase)	ADSL AMPS	1.33395	1.02635		0.408521		0.353902	0.933378	0.985663		-0.101912		0.433496				1
O00244	Copper transport protein ATOX1 (Metal transport protein ATX1)	ATOX1 HAH1	1.16921	2.18327	2.02929	1.44132		0.964188	1.06727	1.02343	0.873758	-0.0293879		0.0850024				1
O60502	Protein O-GlcNAcase (OGA) (EC 3.2.1.169) (Beta-N-acetylglucosaminidase) (Beta-N-acetylhexosaminidase) (Beta-hexosaminidase) (Meningioma-expressed antigen 5) (N-acetyl-beta-D-glucosaminidase) (N-acetyl-beta-glucosaminidase) (Nuclear cytoplasmic O-GlcNAcase and acetyltransferase) (NCOAT)	OGA HEXC KIAA0679 MEA5 MGEA5	1.28328	1.01562	0.798085	0.0784677		0.0303665	1.01715	0.971985	1.31628	0.239112		0.346223				1
O43913	Origin recognition complex subunit 5	ORC5 ORC5L	1.31629	1.11087	0.956233	0.296615		0.456234	1.06914	1.09569	1.51312	0.502492		0.637679				1
Q96ME1	F-box/LRR-repeat protein 18 (F-box and leucine-rich repeat protein 18)	FBXL18 FBL18	1.24624	1.183	0.96921	0.307562		0.583941	1.0315	0.880453	1.13713	0.0400213		0.0463802				1
Q969U7	Proteasome assembly chaperone 2 (PAC-2) (Hepatocellular carcinoma-susceptibility protein 3) (Tumor necrosis factor superfamily member 5-induced protein 1)	PSMG2 HCCA3 PAC2 TNFSF5IP1	1.26244			0.574756			0.950274			-0.125793						1
Q69YN4	Protein virilizer homolog	VIRMA KIAA1429 MSTP054	1.59365			1.14937			0.847951			-0.406774						1
Q9UIC8	Leucine carboxyl methyltransferase 1 (EC 2.1.1.233) (Protein-leucine O-methyltransferase) ([Phosphatase 2A protein]-leucine-carboxy methyltransferase 1)	LCMT1 LCMT CGI-68	1.35192	1.36745	1.24733	0.688894	+	1.97388	0.947013	1.20424	1.2162	0.284968		0.503003				1
O95394	Phosphoacetylglucosamine mutase (PAGM) (EC 5.4.2.3) (Acetylglucosamine phosphomutase) (N-acetylglucosamine-phosphate mutase) (Phosphoglucomutase-3) (PGM 3)	PGM3 AGM1	1.49811	1.59721	1.54972	1.07824	+	2.74743	1.0475	1.15634	1.07445	0.218785		1.01092				1
P48507	Glutamate--cysteine ligase regulatory subunit (GCS light chain) (Gamma-ECS regulatory subunit) (Gamma-glutamylcysteine synthetase regulatory subunit) (Glutamate--cysteine ligase modifier subunit)	GCLM GLCLR	1.1225	1.06885	1.19588	0.299411		1.18155	1.25753	1.31679	1.03586	0.456618		0.872036				1
P08243	Asparagine synthetase [glutamine-hydrolyzing] (EC 6.3.5.4) (Cell cycle control protein TS11) (Glutamine-dependent asparagine synthetase)	ASNS TS11	0.792961	0.86573	0.456829	-0.861508		0.714275	0.77107	0.868102	1.36466	0.00314911		0.0563796				1
Q96BH1	E3 ubiquitin-protein ligase RNF25 (EC 2.3.2.27) (RING finger protein 25) (RING-type E3 ubiquitin transferase RNF25)	RNF25	1.40716	0.806728		0.250579		0.0668479	0.918112	1.22406		0.169373		0.122321				1
Q8WYA6	Beta-catenin-like protein 1 (Nuclear-associated protein) (NAP) (Testis development protein NYD-SP19)	CTNNBL1 C20orf33 PP8304	0.949374	0.965414	0.85396	-0.19784		0.77649	0.942932	0.907571	1.41957	0.212598		0.158088				1
Q14738	Serine/threonine-protein phosphatase 2A 56 kDa regulatory subunit delta isoform (PP2A B subunit isoform B'-delta) (PP2A B subunit isoform B56-delta) (PP2A B subunit isoform PR61-delta) (PP2A B subunit isoform R5-delta)	PPP2R5D	1.37378	1.05623	0.881276	0.243484		0.229246	1.09161	0.8703	1.30944	0.213562		0.22134				1
P10155	RNA-binding protein RO60 (60 kDa SS-A/Ro ribonucleoprotein) (60 kDa Ro protein) (60 kDa ribonucleoprotein Ro) (RoRNP) (Ro 60 kDa autoantigen) (Ro60 autoantigen) (Sjoegren syndrome antigen A2) (Sjoegren syndrome type A antigen) (SS-A) (TROVE domain family member 2)	RO60 SSA2 TROVE2	1.40633	1.0123	1.03158	0.344846		0.452951	1.01854	0.962384	1.17815	0.127428		0.293105				1
Q13232	Nucleoside diphosphate kinase 3 (NDK 3) (NDP kinase 3) (EC 2.7.4.6) (DR-nm23) (Nucleoside diphosphate kinase C) (NDPKC) (nm23-H3)	NME3	1.45433	1.23115		0.72685		0.751184	0.912714	0.926908		-0.206152		1.23225				1
Q9BXW9	Fanconi anemia group D2 protein (Protein FACD2)	FANCD2 FACD	1.57301			1.11722			0.944448			-0.140961						1
Q9Y3L3	SH3 domain-binding protein 1	SH3BP1	1.2861			0.620549			0.958893			-0.103526						1
O75170	Serine/threonine-protein phosphatase 6 regulatory subunit 2 (SAPS domain family member 2)	PPP6R2 KIAA0685 PP6R2 SAPS2	1.40499	1.17698		0.629908		0.666564	0.750575	0.905927		-0.464748		0.539281				1
Q9BST9	Rhotekin	RTKN RTKN1	1.1673	1.05616	0.945594	0.135212		0.310634	0.831114	1.1747	1.29913	0.238755		0.209486				1
Q9NVR0	Kelch-like protein 11	KLHL11	1.34534			0.731613			0.958833			-0.103679						1
O95671	Probable bifunctional dTTP/UTP pyrophosphatase/methyltransferase protein [Includes: dTTP/UTP pyrophosphatase (dTTPase/UTPase) (EC 3.6.1.9) (Nucleoside triphosphate pyrophosphatase) (Nucleotide pyrophosphatase) (Nucleotide PPase); N-acetylserotonin O-methyltransferase-like protein (ASMTL) (EC 2.1.1.-)]	ASMTL	1.84825	1.73895	1.34842	1.22789	+	1.43327	0.893707	0.986308	1.27254	0.122332		0.124371				1
Q9UNQ2	Probable dimethyladenosine transferase (EC 2.1.1.183) (DIM1 dimethyladenosine transferase 1 homolog) (DIM1 dimethyladenosine transferase 1-like) (Probable 18S rRNA (adenine(1779)-N(6)/adenine(1780)-N(6))-dimethyltransferase) (Probable 18S rRNA dimethylase) (Probable S-adenosylmethionine-6-N',N'-adenosyl(rRNA) dimethyltransferase)	DIMT1 DIMT1L HUSSY-05	0.920139	0.792054	0.690346	-0.547731		0.958401	1.21659	0.841155	0.790469	-0.128051		0.185873				1
Q8TAD8	Smad nuclear-interacting protein 1 (FHA domain-containing protein SNIP1)	SNIP1		3.06688	1.39094	1.97677		0.497983		1.15603	0.98231	0.164956		0.238092				1
Q9BXV9	EKC/KEOPS complex subunit GON7	GON7 C14orf142		1.59572		1.15257				1.06563		0.156782						1
Q9NQS7	Inner centromere protein	INCENP	0.653907	1.81841	1.11219	0.439017		0.106641	0.992858	0.746569	1.00519	-0.219433		0.377814				1
P63098	Calcineurin subunit B type 1 (Protein phosphatase 2B regulatory subunit 1) (Protein phosphatase 3 regulatory subunit B alpha isoform 1)	PPP3R1 CNA2 CNB	1.08399	2.18299	1.20763	0.986039		0.603812	0.942466	0.978566	0.921489	-0.132985		1.04321				1
A6NIH7	Protein unc-119 homolog B	UNC119B	0.966702	1.57689	0.926844	0.359262		0.244881	0.947728	3.84368	1.15104	1.68574		0.409872				1
Q2KHM9	Protein moonraker (MNR) (OFD1- and FOPNL-interacting protein)	KIAA0753 MNR OFIP	0.730026	0.925241	1.14369	-0.17108		0.240165	1.10663	1.23942	1.06863	0.319308		0.981509				1
Q86WX3	Active regulator of SIRT1 (40S ribosomal protein S19-binding protein 1) (RPS19-binding protein 1) (S19BP)	RPS19BP1 AROS	0.866088	1.39759		0.305433		0.120186	1.1379	0.901105		0.047634		0.030625				1
Q9P0K7	Ankycorbin (Ankyrin repeat and coiled-coil structure-containing protein) (Novel retinal pigment epithelial cell protein) (Retinoic acid-induced protein 14)	RAI14 KIAA1334 NORPEG	0.90738	0.928724	1.26649	0.0829314		0.0661836	1.1386	0.95553	1.03456	0.10359		0.285705				1
O75475	PC4 and SFRS1-interacting protein (CLL-associated antigen KW-7) (Dense fine speckles 70 kDa protein) (DFS 70) (Lens epithelium-derived growth factor) (Transcriptional coactivator p75/p52)	PSIP1 DFS70 LEDGF PSIP2	1.52572	0.962604	1.16227	0.484083		0.503047	0.989101	1.451	1.19187	0.471465		0.606956				1
Q9Y5Y2	Cytosolic Fe-S cluster assembly factor NUBP2 (Nucleotide-binding protein 2) (NBP 2)	NUBP2	1.65723	2.04792	1.22052	1.22291		1.05774	0.918612	1.40552	0.998765	0.252119		0.235418				1
Q9H1D9	DNA-directed RNA polymerase III subunit RPC6 (RNA polymerase III subunit C6) (DNA-directed RNA polymerase III subunit F) (RNA polymerase III 39 kDa subunit) (RPC39)	POLR3F			3.31411	2.9551					0.926275	-0.18888						1
Q2NKX8	DNA excision repair protein ERCC-6-like (EC 3.6.4.12) (ATP-dependent helicase ERCC6-like) (PLK1-interacting checkpoint helicase) (Tumor antigen BJ-HCC-15)	ERCC6L PICH	1.00345	1.30498	1.589	0.645449		0.681893	0.987586	1.05282	1.48459	0.397734		0.430256				1
Q96RS6	NudC domain-containing protein 1 (Chronic myelogenous leukemia tumor antigen 66) (Tumor antigen CML66)	NUDCD1 CML66			0.680585	-0.949041					0.86429	-0.359703						1
Q16831	Uridine phosphorylase 1 (UPase 1) (UrdPase 1) (EC 2.4.2.3)	UPP1 UP	0.701254	0.669405	0.43512	-1.25195		1.13436	1.16076	0.833955	2.92629	1.22058		0.343841				1
O43683	Mitotic checkpoint serine/threonine-protein kinase BUB1 (hBUB1) (EC 2.7.11.1) (BUB1A)	BUB1 BUB1L	1.18625	0.446366	1.72068	0.274575		0.0243177	0.77026	1.01902	1.22272	0.0098472		0.0324097				1
Q8NCN4	E3 ubiquitin-protein ligase RNF169 (EC 2.3.2.27) (RING finger protein 169) (RING-type E3 ubiquitin transferase RNF169)	RNF169 KIAA1991	0.916171	1.19167	1.64981	0.555369		0.434042	0.914265	1.15556	0.980584	0.0410963		0.0551025				1
P61326	Protein mago nashi homolog	MAGOH MAGOHA	1.28436	1.33196	1.03719	0.486051		0.873076	1.02315	1.30984	1.46878	0.584154		0.773171				1
Q6FIF0	AN1-type zinc finger protein 6 (Associated with PRK1 protein) (Zinc finger A20 domain-containing protein 3)	ZFAND6 AWP1 ZA20D3 HT032	1.11745		1.11916	0.275768	+	2.36242	0.926578		0.690355	-0.524376		0.430872				1
Q9NV06	DDB1- and CUL4-associated factor 13 (WD repeat and SOF domain-containing protein 1)	DCAF13 WDSOF1 HSPC064	1.16724	0.998912	1.08562	0.198754		0.651947	1.24046	1.16338	1.03976	0.340116		0.921488				1
Q96ER3	Protein SAAL1 (Synoviocyte proliferation-associated in collagen-induced arthritis protein 1) (SPACIA1)	SAAL1	1.56186			1.09968			1.12868			0.298544							1
Q6PCB5	Lysine-specific demethylase RSBN1L (EC 1.14.11.-) (Round spermatid basic protein 1-like protein)	RSBN1L	1.7938			1.44115			0.731459			-0.771247							1
Q9NYF3	Protein FAM53C	FAM53C C5orf6	2.32865			2.08474			0.968047			-0.080092							1
Q9NVU7	Protein SDA1 homolog (Nucleolar protein 130) (SDA1 domain-containing protein 1) (hSDA)	SDAD1 NUC130	1.04683		0.866412	-0.10938		0.156974	1.32487		1.04701	0.420588		0.401253					1
Q86VR7	V-set and immunoglobulin domain-containing protein 10-like (VSIG10-like protein)	VSIG10L	0.998382	0.801766	0.845163	-0.310319		0.726906	0.631005	0.58087	0.817156	-0.964458		1.22454					1
Q9H4Z2	Zinc finger protein 335 (NRC-interacting factor 1) (NIF-1)	ZNF335	34.8688			8.7593			1.04769			0.114893							1
Q6P1N9	Deoxyribonuclease TATDN1 (EC 3.1.21.-) (Hepatocarcinoma high expression protein)	TATDN1 CDA11	1.89822	1.64675		1.41167		1.10252	1.17941	1.4364	1.66258	0.875449		1.13098					1
Q8IXH7	Negative elongation factor C/D (NELF-C/D) (TH1-like protein)	NELFCD NELFD TH1 TH1L HSPC130	1.4575	1.19234	0.942811	0.444622		0.493304	1.10992	0.994953	1.78641	0.64155		0.475476					1
Q76L83	Putative Polycomb group protein ASXL2 (Additional sex combs-like protein 2)	ASXL2 ASXH2 KIAA1685	12.8169	5.43925	1.00005	4.58541		0.699729	1.18179	1.79361	0.80909	0.572921		0.287317					1
Q9BSH5	Haloacid dehalogenase-like hydrolase domain-containing protein 3	HDHD3 C9orf158	2.19932	1.13963		1.264		0.40299	0.967122	1.00967		-0.0287892		0.168514					1
Q9ULT8	E3 ubiquitin-protein ligase HECTD1 (EC 2.3.2.26) (E3 ligase for inhibin receptor) (EULIR) (HECT domain-containing protein 1)	HECTD1 KIAA1131	1.09891	0.893218	0.65691	-0.306846		0.365561	1.00256	1.02128	1.36894	0.303454		0.419492					1
Q15645	Pachytene checkpoint protein 2 homolog (Human papillomavirus type 16 E1 protein-binding protein) (16E1-BP) (HPV16 E1 protein-binding protein) (Thyroid hormone receptor interactor 13) (Thyroid receptor-interacting protein 13) (TR-interacting protein 13) (TRIP-13)	TRIP13 PCH2	1.54221	1.59098	1.05811	0.824727		0.866293	0.901705	0.788494	1.30373	-0.00499966		0.0545931					1
Q9GZR7	ATP-dependent RNA helicase DDX24 (EC 3.6.4.13) (DEAD box protein 24)	DDX24	0.728109	0.701938	0.694722	-0.85075	+	2.77012	1.48487	0.83082	1.01122	0.255091		0.150165					1
Q9Y2P8	RNA 3'-terminal phosphate cyclase-like protein	RCL1 RNAC RPC2 RPCL1 RTC2 HSPC338	1.20043	0.901279		0.122338		0.0812779	1.06502	1.2193		0.327827		0.516895					1
P84090	Enhancer of rudimentary homolog	ERH	0.991682	1.11928	0.729506	-0.134767		0.196351	1.4655	1.19274	0.893812	0.416596		0.388699					1
P58557	Endoribonuclease YbeY (EC 3.1.-.-)	YBEY C21orf57	0.949325	0.638203	0.848379	-0.513714		0.69621	0.830262	0.959424	1.1715	-0.0321207		0.0763259					1
Q9BY42	Replication termination factor 2 (RTF2) (Replication termination factor 2 domain-containing protein 1)	RTF2 C20orf43 RTFDC1 AD-007 CDA05 HSPC164 HSPC169	1.00785	0.978058	1.02461	0.00862917		0.0807553	1.33735	1.31252	1.16993	0.59583	+	1.53664					1
Q96KB5	Lymphokine-activated killer T-cell-originated protein kinase (EC 2.7.12.2) (Cancer/testis antigen 84) (CT84) (MAPKK-like protein kinase) (Nori-3) (PDZ-binding kinase) (Spermatogenesis-related protein kinase) (SPK) (T-LAK cell-originated protein kinase)	PBK TOPK	1.26551	1.16625	1.36039	0.577906	+	1.45913	1.04152	1.13682	1.05206	0.18249		0.928271					1
Q96RL1	BRCA1-A complex subunit RAP80 (Receptor-associated protein 80) (Retinoid X receptor-interacting protein 110) (Ubiquitin interaction motif-containing protein 1)	UIMC1 RAP80 RXRIP110	1.41107			0.849271			1.21837	0.605745		-0.227029		0.13139					1
Q9BWJ5	Splicing factor 3B subunit 5 (SF3b5) (Pre-mRNA-splicing factor SF3b 10 kDa subunit)	SF3B5 SF3B10	0.715134	0.713139	0.986192	-0.53552		0.777267	1.3714	1.794	1.04097	0.833582		0.734758					1
Q99590	Protein SCAF11 (CTD-associated SR protein 11) (Renal carcinoma antigen NY-REN-40) (SC35-interacting protein 1) (SR-related and CTD-associated factor 11) (SRSF2-interacting protein) (Serine/arginine-rich splicing factor 2-interacting protein) (Splicing factor, arginine/serine-rich 2-interacting protein) (Splicing regulatory protein 129) (SRrp129)	SCAF11 CASP11 SFRS2IP SIP1 SRSF2IP	0.810967	0.744143	0.709076	-0.69401	+	1.72772	1.08576	1.09276	0.947384	0.101394		0.30934					1
Q17RS7	Flap endonuclease GEN homolog 1 (EC 3.1.-.-)	GEN1		1.53733	0.983084	0.570397		0.27964		0.936487	1.01042	-0.066357		0.222035					1
Q96MF7	E3 SUMO-protein ligase NSE2 (EC 2.3.2.-) (E3 SUMO-protein transferase NSE2) (MMS21 homolog) (hMMS21) (Non-structural maintenance of chromosomes element 2 homolog) (Non-SMC element 2 homolog)	NSMCE2 C8orf36 MMS21	0.799345	0.802369	0.973168	-0.376873		0.864026	1.13966	1.1681	1.2175	0.397918	+	1.85261					1
Q14202	Zinc finger MYM-type protein 3 (Zinc finger protein 261)	ZMYM3 DXS6673E KIAA0385 ZNF261	0.7033	1.21953	0.859181	-0.186055		0.227931	0.976494	0.940812	0.82916	-0.217767		0.68133					1
Q9Y530	ADP-ribose glycohydrolase OARD1 (O-acetyl-ADP-ribose deacetylase 1) (EC 3.5.1.-) (Terminal ADP-ribose protein glycohydrolase 1) ([Protein ADP-ribosylglutamate] hydrolase OARD1) (EC 3.2.2.-)	OARD1 C6orf130 TARG1	1.32262	2.31534	1.66065	1.40291		1.10031	1.07842	0.803263	0.898095	-0.188032		0.363969					1
Q75QN2	Integrator complex subunit 8 (Int8) (Protein kaonashi-1)	INTS8 C8orf52		1.03194		0.0775329				0.894482		-0.275019							1
Q9BRT6	Protein LLP homolog (Protein LAPS18-like)	LLPH C12orf31 cPERP-G	0.75197	1.03689	0.838355	-0.327253		0.565572	1.23705	1.05336	0.790037	0.0652682		0.0232476					1
Q9H6F5	Coiled-coil domain-containing protein 86 (Cytokine-induced protein with coiled-coil domain)	CCDC86 CYCLON		1.09081		0.214383				2.06309		1.78611							1
Q9GZR2	RNA exonuclease 4 (EC 3.1.-.-) (Exonuclease XPMC2) (Prevents mitotic catastrophe 2 protein homolog) (hPMC2)	REXO4 PMC2 XPMC2H	1.0569	1.14902	1.25877	0.355172		0.969697	1.42878	1.23764	0.993209	0.490175		0.661912					1
Q8WVK2	U4/U6.U5 small nuclear ribonucleoprotein 27 kDa protein (U4/U6.U5 snRNP 27 kDa protein) (U4/U6.U5-27K) (Nucleic acid-binding protein RY-1) (U4/U6.U5 tri-snRNP-associated 27 kDa protein) (27K) (U4/U6.U5 tri-snRNP-associated protein 3)	SNRNP27		0.938542		-0.156432				0.813417		-0.509318							1
Q8IWI9	MAX gene-associated protein (MAX dimerization protein 5)	MGA KIAA0518 MAD5	0.627548	1.01794	0.802279	-0.501735		0.599234	1.1214	1.41579	0.945638	0.368052		0.435988					1
O95696	Bromodomain-containing protein 1 (BR140-like protein) (Bromodomain and PHD finger-containing protein 2)	BRD1 BRL BRPF2	0.668925	1.31085		-0.0250678		0.0569027	1.09207	1.03268		0.149227		0.557307					1
Q8IYL3	UPF0688 protein C1orf174	C1orf174	0.670645	1.05543	0.80597	-0.418246		0.535715	1.00186	1.15809	0.807484	-0.0269122		0.0680962					1
Q8N8A6	ATP-dependent RNA helicase DDX51 (EC 3.6.4.13) (DEAD box protein 51)	DDX51	1.03177	1.32362	1.00069	0.276625		0.442757	0.805068	0.863165	0.953625	-0.332283		0.966688					1
Q9H0S4	Probable ATP-dependent RNA helicase DDX47 (EC 3.6.4.13) (DEAD box protein 47)	DDX47	1.07619	1.0737	1.11063	0.205379	+	1.77542	0.947389	1.08432	1.01381	0.037142		0.118392					1
O75586	Mediator of RNA polymerase II transcription subunit 6 (Activator-recruited cofactor 33 kDa component) (ARC33) (Mediator complex subunit 6) (hMed6) (Renal carcinoma antigen NY-REN-28)	MED6 ARC33			2.68391	2.43492					1.33952	0.720921							1
P56270	Myc-associated zinc finger protein (MAZI) (Pur-1) (Purine-binding transcription factor) (Serum amyloid A-activating factor-1) (SAF-1) (Transcription factor Zif87) (ZF87) (Zinc finger protein 801)	MAZ ZNF801	0.750287		1.49607	0.28649		0.0484691	1.24013		1.30911	0.598445		1.14981					1
Q8WVY7	Ubiquitin-like domain-containing CTD phosphatase 1 (EC 3.1.3.16) (Nuclear proteasome inhibitor UBLCP1)	UBLCP1	1.18613		1.35684	0.592372		0.756172	0.841224		1.18149	0.0278474		0.00501329					1
Q9Y2R4	Probable ATP-dependent RNA helicase DDX52 (EC 3.6.4.13) (ATP-dependent RNA helicase ROK1-like) (DEAD box protein 52)	DDX52 ROK1 HUSSY-19	0.996026	1.01971	1.37619	0.302821		0.40259	0.971486	0.954789	1.15912	0.0692188		0.134169					1
Q96NJ6	Zinc finger protein 3 homolog (Zfp-3) (Zinc finger protein 752)	ZFP3 ZNF752			2.10001	1.82985					1.04312	0.104115							1
Q76FK4	Nucleolar protein 8 (Nucleolar protein Nop132)	NOL8 C9orf34 NOP132	0.836856	0.879768	1.67175	0.300244		0.104903	0.955212	0.84954	0.583316	-0.562631		0.627534					1
Q9NX70	Mediator of RNA polymerase II transcription subunit 29 (Intersex-like protein) (Mediator complex subunit 29)	MED29 IXL	1.19028	0.653391	1.33356	0.141562		0.017188	0.889023	1.1689	0.948169	0.0050046		0.0187061					1
Q9NRL2	Bromodomain adjacent to zinc finger domain protein 1A (ATP-dependent chromatin-remodeling protein) (ATP-utilizing chromatin assembly and remodeling factor 1) (hACF1) (CHRAC subunit ACF1) (Williams syndrome transcription factor-related chromatin-remodeling factor 180) (WCRF180) (hWALp1)	BAZ1A ACF1 WCRF180 HSPC317	0.812533	0.694815	1.16664	-0.283723		0.337111	0.838788	0.797145	0.942183	-0.373777		1.04809					1
O75818	Ribonuclease P protein subunit p40 (RNaseP protein p40) (RNase P subunit 1)	RPP40 RNASEP1	1.04593	1.2713	1.02501	0.266439		0.566019	1.19396	1.17297	1.29153	0.489388	+	1.66351					1
P15927	Replication protein A 32 kDa subunit (RP-A p32) (Replication factor A protein 2) (RF-A protein 2) (Replication protein A 34 kDa subunit) (RP-A p34)	RPA2 REPA2 RPA32 RPA34	1.22342	0.861073	1.98291	0.750728		0.380155	1.16316	1.33542	0.988566	0.371106		0.616669					1
Q6PK04	Coiled-coil domain-containing protein 137	CCDC137 cPERP-B	0.793558	1.08685	0.927113	-0.163539		0.30282	1.15553	1.27121	1.12283	0.414871	+	1.3275					1
Q8NFZ8	Cell adhesion molecule 4 (Immunoglobulin superfamily member 4C) (IgSF4C) (Nectin-like protein 4) (NECL-4) (TSLC1-like protein 2)	CADM4 IGSF4C NECL4 TSLL2	1.49281	1.43512	1.42719	0.919282	+	2.84167	1.07444	1.48218	1.33569	0.642198		0.930161						1
O95870	Phosphatidylserine lipase ABHD16A (EC 3.1.-.-) (Alpha/beta hydrolase domain-containing protein 16A) (Abhydrolase domain-containing protein 16A) (HLA-B-associated transcript 5) (hBAT5) (Monoacylglycerol lipase ABHD16A) (EC 3.1.1.23) (Protein G5)	ABHD16A BAT5 G5 NG26 PP199	0.956678	1.1017		0.0709619		0.111805	1.15249	0.750803		-0.122235		0.100887						1
Q7L273	BTB/POZ domain-containing protein KCTD9	KCTD9	1.41932	1.28749	1.38222	0.763802	+	2.05742	1.46259	1.39901	1.41412	0.873909	+	2.84586						1
Q5TFQ8	Signal-regulatory protein beta-1 isoform 3 (SIRP-beta-1 isoform 3)	SIRPB1	2.16097			1.90043			0.91051			-0.231217								1
O75054	Immunoglobulin superfamily member 3 (IgSF3) (Glu-Trp-Ile EWI motif-containing protein 3) (EWI-3)	IGSF3 EWI3 KIAA0466	0.990411	1.02718	1.11544	0.107011		0.451653	0.89832	0.93133	0.873245	-0.257207	+	1.51879						1
Q9NYI0	PH and SEC7 domain-containing protein 3 (Epididymis tissue protein Li 20mP) (Exchange factor for ADP-ribosylation factor guanine nucleotide factor 6 D) (Exchange factor for ARF6 D) (Hepatocellular carcinoma-associated antigen 67) (Pleckstrin homology and SEC7 domain-containing protein 3)	PSD3 EFA6D EFA6R HCA67 KIAA0942	1.27163			0.592655			1.1136	0.709139		-0.228891		0.159178						1
P37235	Hippocalcin-like protein 1 (Calcium-binding protein BDR-1) (HLP2) (Visinin-like protein 3) (VILIP-3)	HPCAL1 BDR1	1.54435	1.43784	1.41679	0.944003	+	2.31691	1.23419	1.25362	1.03985	0.3996		0.928131						1
Q9Y639	Neuroplastin (Stromal cell-derived receptor 1) (SDR-1)	NPTN SDFR1 SDR1	1.32551	1.1743	1.14472	0.479983		1.29244	1.10155	1.03466	1.07282	0.166128		1.17929						1
Q8TBB5	Kelch domain-containing protein 4	KLHDC4	0.895386			-0.272528			1.34044			0.72263								1
Q9C0D5	Protein TANC1 (Tetratricopeptide repeat, ankyrin repeat and coiled-coil domain-containing protein 1)	TANC1 KIAA1728	0.961198	1.33152	1.52606	0.59516		0.610447	0.958053	1.02146	1.06057	0.0327317		0.144623						1
O43414	ERI1 exoribonuclease 3 (EC 3.1.-.-) (Prion interactor 1) (Prion protein-interacting protein)	ERI3 PINT1 PRNPIP PRNPIP1	1.7081	1.58034	2.41721	1.58545	+	1.38724	0.93178	1.14915	1.46649	0.413369		0.431999						1
Q9BRP4	Proteasomal ATPase-associated factor 1 (Protein G-16) (WD repeat-containing protein 71)	PAAF1 WDR71	1.96978	1.43106	1.00635	0.948604		0.667553	0.921677	1.05408	0.952538	-0.0596611		0.230723						1
Q9Y2D4	Exocyst complex component 6B (Exocyst complex component Sec15B) (SEC15-like protein 2)	EXOC6B KIAA0919 SEC15B SEC15L2	1.16829	1.00683	0.869959	0.0367826		0.0285681	0.880491	0.818075	1.28247	-0.0156369		0.0619929						1
Q9NVA2	Septin-11	SEPTIN11 SEPT11	1.2312	1.13936	1.24849	0.462675	+	1.64932	1.04077	1.14053	1.21762	0.307907		0.941914						1
Q9Y608	Leucine-rich repeat flightless-interacting protein 2 (LRR FLII-interacting protein 2)	LRRFIP2	0.962304	1.82537	1.23177	0.721474		0.520595	1.19781	1.75232	1.29251	0.854753		0.985205						1
Q86WR7	Proline and serine-rich protein 2	PROSER2 C10orf47	1.19163	0.99879	1.57468	0.560252		0.593671	1.11174	1.23819	0.977382	0.255393		0.545226						1
Q9Y546	Leucine-rich repeat-containing protein 42	LRRC42		3.73663		3.25104				1.13978		0.322676								1
Q6UW68	Transmembrane protein 205	TMEM205 UNQ501/PRO1018	0.769819	2.16414	0.643404	0.434103		0.0192057	1.06229	0.86021	1.36458	0.225389		0.196124						1
Q9BTY7	Protein HGH1 homolog	HGH1 C8orf30A C8orf30B FAM203A FAM203B	1.39326	1.07543	1.08198	0.415633		0.69967	0.988622	2.01782	1.12775	0.790895		0.464913						1
O95490	Adhesion G protein-coupled receptor L2 (Calcium-independent alpha-latrotoxin receptor 2) (CIRL-2) (Latrophilin homolog 1) (Latrophilin-2) (Lectomedin-1)	ADGRL2 KIAA0786 LEC1 LPHH1 LPHN2		0.82817		-0.464989				1.23636		0.523276								1
Q7Z4Q2	HEAT repeat-containing protein 3	HEATR3	1.35057	1.43186	0.760302	0.410112		0.229329	0.97858	0.775157	1.13713	-0.0913924		0.153874						1
Q15386	Ubiquitin-protein ligase E3C (EC 2.3.2.26) (HECT-type ubiquitin transferase E3C) (Homologous to E6AP carboxyl terminus homologous protein 2) (HectH2) (RTA-associated ubiquitin ligase) (RAUL)	UBE3C KIAA0010 KIAA10	1.36918	1.57613	0.935451	0.634869		0.565753	0.94774	0.830883	1.45727	0.186685		0.0903395						1
Q8IWP9	Coiled-coil domain-containing protein 28A (CCRL1AP)	CCDC28A C6orf80	1.17828	1.30734		0.536116		0.823073	1.05896	0.958957		0.0220003		0.0447603						1
Q5SWX8	Protein odr-4 homolog (hODR-4) (LAG1-interacting protein) (Transactivated by transforming growth factor beta protein 1)	ODR4 C1orf27 TTG1 TTG1A	1.05896	1.28843	0.765877	0.0914002		0.0306706	0.913071	0.747041	1.0449	-0.255276		0.435952						1
Q4KMQ1	Taperin	TPRN C9orf75	1.19986	1.16715	2.06087	0.960156		0.706649	1.18667	1.18913	0.719526	0.0771503		0.00941729						1
Q9H993	Damage-control phosphatase ARMT1 (EC 3.1.3.-) (Acidic residue methyltransferase 1) (Protein-glutamate O-methyltransferase) (EC 2.1.1.-) (Sugar phosphate phosphatase ARMT1)	ARMT1 C6orf211	1.1569	1.38663	0.995667	0.407646		0.611473	0.82827	0.895191	1.59977	0.252368		0.0916311						1
O43583	Density-regulated protein (DRP) (Protein DRP1) (Smooth muscle cell-associated protein 3) (SMAP-3)	DENR DRP1 H14	0.810346		0.553835	-0.943591		0.549244	0.946493		1.01953	-0.0422536		0.145482						1
Q9UHR6	Zinc finger HIT domain-containing protein 2 (Protein FON)	ZNHIT2 C11orf5		0.983461	1.19806	0.214266		0.25291		0.942469	1.04088	-0.0206201		0.056252						1
Q8WUH1	Protein Churchill	CHURC1 C14orf52 CHCH My015			0.829153	-0.462064					1.10116	0.237674								1
Q9NPR2	Semaphorin-4B (Semaphorin-C)	SEMA4B KIAA1745 SEMAC UNQ749/PRO1480			0.929484	-0.18035					1.06823	0.162773								1
Q0VDG4	Secernin-3	SCRN3	1.64243	1.35722	1.18602	0.82141		1.12237	0.963409	1.20598	1.22006	0.301023		0.569572						1

## Sheet: Whole proteome
Majority Protein ID	Protein description	Gene name	Rep1-ratio (PC9-BrM3/PC9)	Rep2-ratio (PC9-BrM3/PC9)	Rep3-ratio (PC9-BrM3/PC9)	Log1.5-Average-ratio (PC9-BrM3/PC9)	T-test Significant	-Log10(p value) (PC9-BrM3/PC9)	Rep1-ratio (BrM3-CoCl2/Ctrl)	Rep2-ratio (BrM3-CoCl2/Ctrl)	Rep3-ratio (BrM3-CoCl2/Ctrl)	Log1.5-Average-ratio (BrM3-CoCl2/Ctrl)	T-test Significant	-Log10(p value) (BrM3-CoCl2/Ctrl)	Subcellular location
															Golgi-annotated	Golgi-associated	Mitochondrion	Cytoplasm	Nucleus	Others
Q09666	Neuroblast differentiation-associated protein AHNAK (Desmoyokin)	AHNAK PM227	0.729199	0.768129	0.727255	-0.73753	+	2.45391	1.10101	1.03967	1.03629	0.141354		0.99313	1
P49327	Fatty acid synthase (EC 2.3.1.85) (Type I fatty acid synthase) [Includes: [Acyl-carrier-protein] S-acetyltransferase (EC 2.3.1.38); [Acyl-carrier-protein] S-malonyltransferase (EC 2.3.1.39); 3-oxoacyl-[acyl-carrier-protein] synthase (EC 2.3.1.41); 3-oxoacyl-[acyl-carrier-protein] reductase (EC 1.1.1.100); 3-hydroxyacyl-[acyl-carrier-protein] dehydratase (EC 4.2.1.59); Enoyl-[acyl-carrier-protein]…	FASN FAS	0.834177	0.868301	0.848638	-0.399742	+	2.29364	1.08048	1.04034	0.939118	0.0487944		0.149649	1
P21333	Filamin-A (FLN-A) (Actin-binding protein 280) (ABP-280) (Alpha-filamin) (Endothelial actin-binding protein) (Filamin-1) (Non-muscle filamin)	FLNA FLN FLN1	0.658662	0.699905	0.672777	-0.961649	+	2.68333	0.951646	1.01227	0.934197	-0.0852163		0.545889	1
O75369	Filamin-B (FLN-B) (ABP-278) (ABP-280 homolog) (Actin-binding-like protein) (Beta-filamin) (Filamin homolog 1) (Fh1) (Filamin-3) (Thyroid autoantigen) (Truncated actin-binding protein) (Truncated ABP)	FLNB FLN1L FLN3 TABP TAP	0.841458	0.814644	0.832064	-0.461363	+	2.59115	0.982485	1.04661	0.976712	0.00477057		0.0204614	1
Q00610	Clathrin heavy chain 1 (Clathrin heavy chain on chromosome 17) (CLH-17)	CLTC CLH17 CLTCL2 KIAA0034	1.11325	1.07428	1.10459	0.229166	+	1.87591	0.999054	1.06792	1.01037	0.0627747		0.457913	1
Q01082	Spectrin beta chain, non-erythrocytic 1 (Beta-II spectrin) (Fodrin beta chain) (Spectrin, non-erythroid beta chain 1)	SPTBN1 SPTB2	0.998271	0.934959	0.917539	-0.125839		0.743438	1.03328	1.00173	1.06056	0.0773407		0.698618	1
P05023	Sodium/potassium-transporting ATPase subunit alpha-1 (Na(+)/K(+) ATPase alpha-1 subunit) (EC 7.2.2.13) (Sodium pump subunit alpha-1)	ATP1A1	1.01152	0.965897	0.935068	-0.073012		0.49844	1.26969	1.03927	1.10841	0.321263		0.782935	1
P18206	Vinculin (Metavinculin) (MV)	VCL	0.619333	0.682908	0.722199	-0.970044	+	1.8977	1.05956	1.04071	1.04766	0.118706	+	1.93334	1
O00410	Importin-5 (Imp5) (Importin subunit beta-3) (Karyopherin beta-3) (Ran-binding protein 5) (RanBP5)	IPO5 KPNB3 RANBP5	1.03427	0.939764	1.05549	0.0241557		0.0788437	0.90198	0.95312	0.912272	-0.199065	+	1.39262	1
P31948	Stress-induced-phosphoprotein 1 (STI1) (Hsc70/Hsp90-organizing protein) (Hop) (Renal carcinoma antigen NY-REN-11) (Transformation-sensitive protein IEF SSP 3521)	STIP1	1.13277	1.19165	1.2785	0.451662	+	1.45273	1.06683	1.01414	0.968051	0.0399801		0.195372	1
Q86VP6	Cullin-associated NEDD8-dissociated protein 1 (Cullin-associated and neddylation-dissociated protein 1) (TBP-interacting protein of 120 kDa A) (TBP-interacting protein 120A) (p120 CAND1)	CAND1 KIAA0829 TIP120 TIP120A	0.865453	0.888457	0.897986	-0.304188	+	2.10821	0.920396	0.987975	0.886444	-0.174728		0.817463	1
P00533	Epidermal growth factor receptor (EC 2.7.10.1) (Proto-oncogene c-ErbB-1) (Receptor tyrosine-protein kinase erbB-1)	EGFR ERBB ERBB1 HER1	1.09339	1.26698	1.18675	0.413164		1.22006	1.64654	1.26629	1.33745	0.859187		1.29559	1
P26641	Elongation factor 1-gamma (EF-1-gamma) (eEF-1B gamma)	EEF1G EF1G PRO1608	1.0715	0.948584	0.95156	-0.0234234		0.0928666	1.10049	1.1929	0.991509	0.223757		0.615554	1
Q9Y678	Coatomer subunit gamma-1 (Gamma-1-coat protein) (Gamma-1-COP)	COPG1 COPG	1.10841	1.05649	1.08005	0.193572	+	1.52359	1.02905	1.04559	0.986174	0.0494947		0.425834	1
O95573	Fatty acid CoA ligase Acsl3 (Arachidonate--CoA ligase) (EC 6.2.1.15) (Long-chain acyl-CoA synthetase 3) (LACS 3) (Long-chain-fatty-acid--CoA ligase 3) (EC 6.2.1.3) (Medium-chain acyl-CoA ligase Acsl3) (EC 6.2.1.2)	ACSL3 ACS3 FACL3 LACS3	0.659138	0.721173	0.613027	-1.00823	+	1.89211	1.08258	1.00118	1.06725	0.121126		0.742685	1
P53621	Coatomer subunit alpha (Alpha-coat protein) (Alpha-COP) (HEP-COP) (HEPCOP) [Cleaved into: Xenin (Xenopsin-related peptide); Proxenin]	COPA	1.00969	1.0127	1.04799	0.0571904		0.713409	0.9312	0.971157	0.877776	-0.18772		0.922136	1
P50454	Serpin H1 (47 kDa heat shock protein) (Arsenic-transactivated protein 3) (AsTP3) (Cell proliferation-inducing gene 14 protein) (Collagen-binding protein) (Colligin) (Rheumatoid arthritis-related antigen RA-A47)	SERPINH1 CBP1 CBP2 HSP47 SERPINH2 PIG14	1.02159	1.0483	0.860983	-0.0574961		0.152318	1.11771	1.03948	1.06385	0.175332		1.09259	1
P07237	Protein disulfide-isomerase (PDI) (EC 5.3.4.1) (Cellular thyroid hormone-binding protein) (Prolyl 4-hydroxylase subunit beta) (p55)	P4HB ERBA2L PDI PDIA1 PO4DB	0.87229	1.00454	0.920967	-0.172095		0.6493	1.34299	1.1546	1.15876	0.487964		1.22722	1
P62873	Guanine nucleotide-binding protein G(I)/G(S)/G(T) subunit beta-1 (Transducin beta chain 1)	GNB1	0.882705	0.874991	0.884475	-0.313248	+	3.16836	1.08851	1.12458	0.993202	0.164011		0.653711	1
P55786	Puromycin-sensitive aminopeptidase (PSA) (EC 3.4.11.14) (Cytosol alanyl aminopeptidase) (AAP-S)	NPEPPS PSA	0.985615	1.03656	1.06617	0.07158		0.467644	1.03487	1.04423	1.03363	0.0909788	+	2.12298	1
P17987	T-complex protein 1 subunit alpha (TCP-1-alpha) (CCT-alpha)	TCP1 CCT1 CCTA	0.935739	0.937935	0.974956	-0.127691		1.22312	0.889905	1.01098	1.00507	-0.0785448		0.297215	1
Q10567	AP-1 complex subunit beta-1 (Adaptor protein complex AP-1 subunit beta-1) (Adaptor-related protein complex 1 subunit beta-1) (Beta-1-adaptin) (Beta-adaptin 1) (Clathrin assembly protein complex 1 beta large chain) (Golgi adaptor HA1/AP1 adaptin beta subunit)	AP1B1 ADTB1 BAM22 CLAPB2	0.988951	1.12992	1.26672	0.298221		0.607619	0.962381	0.959352	0.979947	-0.0821828	+	1.42999	1
P51149	Ras-related protein Rab-7a (EC 3.6.5.2)	RAB7A RAB7	0.902695	1.02416	0.92118	-0.128206		0.515938	1.08694	0.994315	1.05143	0.106734		0.614764	1
O60664	Perilipin-3 (47 kDa mannose 6-phosphate receptor-binding protein) (47 kDa MPR-binding protein) (Cargo selection protein TIP47) (Mannose-6-phosphate receptor-binding protein 1) (Placental protein 17) (PP17)	PLIN3 M6PRBP1 TIP47	1.05129	1.01462	1.06654	0.106549		0.994414	1.08982	1.01671	1.0038	0.0890746		0.5236	1
P50395	Rab GDP dissociation inhibitor beta (Rab GDI beta) (Guanosine diphosphate dissociation inhibitor 2) (GDI-2)	GDI2 RABGDIB	1.08339	0.934385	1.14055	0.126843		0.29514	1.01201	1.06105	0.943328	0.0134311		0.0401541	1
O14980	Exportin-1 (Exp1) (Chromosome region maintenance 1 protein homolog)	XPO1 CRM1	0.949782	0.963845	1.07429	-0.00995523		0.046123	0.985637	0.9492	1.00323	-0.0514459		0.48821	1
Q14247	Src substrate cortactin (Amplaxin) (Oncogene EMS1)	CTTN EMS1	1.1024	1.16083	1.05723	0.250308		1.1868	1.0625	1.14837	1.02923	0.189887		0.839338	1
P53618	Coatomer subunit beta (Beta-coat protein) (Beta-COP)	COPB1 COPB MSTP026	0.991017	0.995749	1.09007	0.0623709		0.28835	0.918674	1.05691	0.899809	-0.104627		0.330617	1
Q9H4A4	Aminopeptidase B (AP-B) (EC 3.4.11.6) (Arginine aminopeptidase) (Arginyl aminopeptidase)	RNPEP APB	0.901287	0.843554	0.977878	-0.239186		0.83298	1.0291	1.00659	0.915709	-0.0402763		0.172835	1
P37802	Transgelin-2 (Epididymis tissue protein Li 7e) (SM22-alpha homolog)	TAGLN2 KIAA0120 CDABP0035	0.974406	0.861715	0.989319	-0.147851		0.533321	1.15323	1.14667	1.04661	0.269579		1.12579	1
P31150	Rab GDP dissociation inhibitor alpha (Rab GDI alpha) (Guanosine diphosphate dissociation inhibitor 1) (GDI-1) (Oligophrenin-2) (Protein XAP-4)	GDI1 GDIL OPHN2 RABGDIA XAP4	1.20437	1.01155	1.18297	0.307882		0.798659	0.905676	1.04533	0.948859	-0.0837253		0.312917	1
P35606	Coatomer subunit beta' (Beta'-coat protein) (Beta'-COP) (p102)	COPB2	0.881762	1.14851	1.03078	0.049683		0.0608843	0.964335	0.9767	0.989069	-0.0581416		1.07638	1
O95782	AP-2 complex subunit alpha-1 (100 kDa coated vesicle protein A) (Adaptor protein complex AP-2 subunit alpha-1) (Adaptor-related protein complex 2 subunit alpha-1) (Alpha-adaptin A) (Alpha1-adaptin) (Clathrin assembly protein complex 2 alpha-A large chain) (Plasma membrane adaptor HA2/AP2 adaptin alpha A subunit)	AP2A1 ADTAA CLAPA1	1.05485	0.970097	1.00919	0.0279117		0.154458	0.938949	0.997895	0.895893	-0.141489		0.693519	1
Q14697	Neutral alpha-glucosidase AB (EC 3.2.1.207) (Alpha-glucosidase 2) (Glucosidase II subunit alpha)	GANAB G2AN KIAA0088	1.06373	1.11703	0.997871	0.142642		0.649198	1.07695	0.972905	1.03425	0.068195		0.337046	1
P55327	Tumor protein D52 (Protein N8)	TPD52	1.22366	1.14861	1.22675	0.448986	+	1.86116	0.946676	1.09509	0.989961	0.0259457		0.0657976	1
Q7L576	Cytoplasmic FMR1-interacting protein 1 (Specifically Rac1-associated protein 1) (Sra-1) (p140sra-1)	CYFIP1 KIAA0068	1.11387	1.01609	1.11155	0.190959		0.89486	0.967113	1.0292	1.01305	0.00768438		0.0478318	1
Q15437	Protein transport protein Sec23B (hSec23B) (SEC23-related protein B)	SEC23B	1.15722	1.2974	1.32929	0.572542	+	1.48484	1.10863	0.982858	0.989519	0.0657129		0.231851	1
P60953	Cell division control protein 42 homolog (EC 3.6.5.2) (G25K GTP-binding protein)	CDC42	0.493074	0.632334	0.482673	-1.53791	+	1.73657	1.35301	1.36389	0.991271	0.522678		0.70903	1
P18085	ADP-ribosylation factor 4	ARF4 ARF2	0.980392	0.993371	1.04354	0.0141868		0.0951025	0.937551	1.03773	1.03139	0.00547997		0.0109122	1
P61204	ADP-ribosylation factor 3	ARF3	0.933605		1.04199	-0.0302863		0.0739638	0.848351		1.04072	-0.14073		0.186034	1
O75534	Cold shock domain-containing protein E1 (N-ras upstream gene protein) (Protein UNR)	CSDE1 D1S155E KIAA0885 NRU UNR	1.17226	0.931241	1.07356	0.141427		0.289963	0.91887	1.13802	0.966411	0.0190834		0.0169886	1
Q99497	Parkinson disease protein 7 (Maillard deglycase) (Oncogene DJ1) (Parkinsonism-associated deglycase) (Protein DJ-1) (DJ-1) (Protein/nucleic acid deglycase DJ-1) (EC 3.1.2.-, EC 3.5.1.-, EC 3.5.1.124)	PARK7	1.10334	1.27894	1.25474	0.474886		1.2636	0.9647	0.93849	0.948693	-0.124876	+	1.61834	1
O00231	26S proteasome non-ATPase regulatory subunit 11 (26S proteasome regulatory subunit RPN6) (26S proteasome regulatory subunit S9) (26S proteasome regulatory subunit p44.5)	PSMD11	1.12102	1.06303	1.14365	0.255682	+	1.37789	0.999798	1.11582	1.04276	0.126889		0.592435	1
P52292	Importin subunit alpha-1 (Karyopherin subunit alpha-2) (RAG cohort protein 1) (SRP1-alpha)	KPNA2 RCH1 SRP1	1.26214	1.19604	1.00227	0.35215		0.730591	0.867479	0.983926	0.954655	-0.164825		0.669516	1
P15531	Nucleoside diphosphate kinase A (NDK A) (NDP kinase A) (EC 2.7.4.6) (Granzyme A-activated DNase) (GAAD) (Metastasis inhibition factor nm23) (NM23-H1) (Tumor metastatic process-associated protein)	NME1 NDPKA NM23	0.970052	1.00771	1.05736	0.0287072		0.153803	0.945442	1.04817	1.22847	0.176133		0.318762	1
Q15084	Protein disulfide-isomerase A6 (EC 5.3.4.1) (Endoplasmic reticulum protein 5) (ER protein 5) (ERp5) (Protein disulfide isomerase P5) (Thioredoxin domain-containing protein 7)	PDIA6 ERP5 P5 TXNDC7	1.15534	1.19416	1.11164	0.352645	+	1.68992	1.0719	1.06257	1.1538	0.226286		1.13464	1
P53634	Dipeptidyl peptidase 1 (EC 3.4.14.1) (Cathepsin C) (Cathepsin J) (Dipeptidyl peptidase I) (DPP-I) (DPPI) (Dipeptidyl transferase) [Cleaved into: Dipeptidyl peptidase 1 exclusion domain chain (Dipeptidyl peptidase I exclusion domain chain); Dipeptidyl peptidase 1 heavy chain (Dipeptidyl peptidase I heavy chain); Dipeptidyl peptidase 1 light chain (Dipeptidyl peptidase I light chain)]	CTSC CPPI	0.942525	1.05276	1.00484	0.000108821		0.00949324	1.08543	1.02102	1.00982	0.0937759		0.625639	1
P17655	Calpain-2 catalytic subunit (EC 3.4.22.53) (Calcium-activated neutral proteinase 2) (CANP 2) (Calpain M-type) (Calpain large polypeptide L2) (Calpain-2 large subunit) (Millimolar-calpain) (M-calpain)	CAPN2 CANPL2	0.848205	0.950346	0.938005	-0.226683		0.913676	0.967453	1.06787	1.0057	0.0335036		0.154638	1
Q9Y2A7	Nck-associated protein 1 (NAP 1) (Membrane-associated protein HEM-2) (p125Nap1)	NCKAP1 HEM2 KIAA0587 NAP1	1.04685	1.2658	1.09323	0.312954		0.783783	0.947405	1.06147	0.953306	-0.031286		0.130876	1
O43747	AP-1 complex subunit gamma-1 (Adaptor protein complex AP-1 subunit gamma-1) (Adaptor-related protein complex 1 subunit gamma-1) (Clathrin assembly protein complex 1 gamma-1 large chain) (Gamma1-adaptin) (Golgi adaptor HA1/AP1 adaptin subunit gamma-1)	AP1G1 ADTG CLAPG1	1.11406	0.795938	0.882596	-0.176694		0.303098	1.14365	0.983405	0.957442	0.0685019		0.155331	1
P51572	B-cell receptor-associated protein 31 (BCR-associated protein 31) (Bap31) (6C6-AG tumor-associated antigen) (Protein CDM) (p28)	BCAP31 BAP31 DXS1357E	1.12389	0.882056	1.00598	0.00978189		0.00403094	1.14896	0.910448	0.937589	-0.0024717		0.027985	1
Q15907	Ras-related protein Rab-11B (EC 3.6.5.2) (GTP-binding protein YPT3)	RAB11B YPT3	1.04257	1.11246	0.987587	0.114546		0.496136	0.872875	0.992942	1.01637	-0.098811		0.331598	1
Q9NYU2	UDP-glucose:glycoprotein glucosyltransferase 1 (UGT1) (hUGT1) (EC 2.4.1.-) (UDP--Glc:glycoprotein glucosyltransferase) (UDP-glucose ceramide glucosyltransferase-like 1)	UGGT1 GT UGCGL1 UGGT UGT1 UGTR	0.952711	1.00709	0.985865	-0.0450798		0.431588	1.04541	0.941585	1.0365	0.0192464		0.0653644	1
Q15008	26S proteasome non-ATPase regulatory subunit 6 (26S proteasome regulatory subunit RPN7) (26S proteasome regulatory subunit S10) (Breast cancer-associated protein SGA-113M) (Phosphonoformate immuno-associated protein 4) (Proteasome regulatory particle subunit p44S10) (p42A)	PSMD6 KIAA0107 PFAAP4	1.17338	0.924732	1.06771	0.132687		0.257976	0.82431	1.18106	1.00959	0.0122657		0.0172946	1
O15144	Actin-related protein 2/3 complex subunit 2 (Arp2/3 complex 34 kDa subunit) (p34-ARC)	ARPC2 ARC34 PRO2446	1.0817	1.14751	1.03894	0.21114		1.00437	1.19938	0.91154	1.13394	0.193505		0.316668	1
P09382	Galectin-1 (Gal-1) (14 kDa laminin-binding protein) (HLBP14) (14 kDa lectin) (Beta-galactoside-binding lectin L-14-I) (Galaptin) (HBL) (HPL) (Lactose-binding lectin 1) (Lectin galactoside-binding soluble 1) (Putative MAPK-activating protein PM12) (S-Lac lectin 1)	LGALS1	1.06014	1.04665	1.35277	0.351519		0.608581	1.12774	1.16034	1.04918	0.262755		1.14326	1
O00429	Dynamin-1-like protein (EC 3.6.5.5) (Dnm1p/Vps1p-like protein) (DVLP) (Dynamin family member proline-rich carboxyl-terminal domain less) (Dymple) (Dynamin-like protein) (Dynamin-like protein 4) (Dynamin-like protein IV) (HdynIV) (Dynamin-related protein 1)	DNM1L DLP1 DRP1	0.915792	0.800408	1.08033	-0.173215		0.333063	0.953986	0.99096	0.905345	-0.126253		0.730063	1
Q9UGI8	Testin (TESS)	TES	0.822358	0.744939	0.927695	-0.454606		1.01245	1.05386	1.11395	0.935134	0.0832078		0.216023	1
P27797	Calreticulin (CRP55) (Calregulin) (Endoplasmic reticulum resident protein 60) (ERp60) (HACBP) (grp60)	CALR CRTC	1.0345	1.10287	1.04328	0.144217		0.993092	1.04133	0.95988	1.27703	0.218745		0.357477	1
P33316	Deoxyuridine 5'-triphosphate nucleotidohydrolase, mitochondrial (dUTPase) (EC 3.6.1.23) (dUTP pyrophosphatase)	DUT	0.920539	1.01705	1.00311	-0.0492417		0.243123	1.12246	1.16265	1.19628	0.367039	+	1.82265	1
O60763	General vesicular transport factor p115 (Protein USO1 homolog) (Transcytosis-associated protein) (TAP) (Vesicle-docking protein)	USO1 VDP	1.2314	1.10997	1.11414	0.348632		1.2669	0.990222	1.08683	1.03833	0.0930766		0.519618	1
Q9NX02	NACHT, LRR and PYD domains-containing protein 2 (Nucleotide-binding site protein 1) (PYRIN domain and NACHT domain-containing protein 1) (PYRIN-containing APAF1-like protein 2)	NLRP2 NALP2 NBS1 PAN1 PYPAF2	1.04293	0.904384	1.09048	0.0308779		0.0539343	0.932082	0.91921	0.895823	-0.217185	+	1.77135	1
Q9H3P7	Golgi resident protein GCP60 (Acyl-CoA-binding domain-containing protein 3) (Golgi complex-associated protein 1) (GOCAP1) (Golgi phosphoprotein 1) (GOLPH1) (PBR- and PKA-associated protein 7) (Peripheral benzodiazepine receptor-associated protein PAP7) [Cleaved into: Golgi resident protein GCP60, N-terminally processed]	ACBD3 GCP60 GOCAP1 GOLPH1	1.07158			0.170499			1.02472			0.0602243			1
P61106	Ras-related protein Rab-14	RAB14	1.05867	0.995786	1.25577	0.242689		0.508315	1.06685	1.04535	0.939179	0.0418818		0.134405	1
P48444	Coatomer subunit delta (Archain) (Delta-coat protein) (Delta-COP)	ARCN1 COPD	1.10847	1.01617	1.11523	0.189709		0.895909	1.02104	0.91045	0.924555	-0.121278		0.529897	1
Q9H3U1	Protein unc-45 homolog A (Unc-45A) (GCUNC-45) (Smooth muscle cell-associated protein 1) (SMAP-1)	UNC45A SMAP1	1.01611	0.981887	0.988298	-0.0112918		0.155508	0.914119	0.980502	1.01828	-0.0726641		0.359535	1
P04040	Catalase (EC 1.11.1.6)	CAT	1.15196		1.03579	0.221292		0.462282	1.13129		0.835516	-0.041275		0.0540513	1
Q9UQB8	Brain-specific angiogenesis inhibitor 1-associated protein 2 (BAI-associated protein 2) (BAI1-associated protein 2) (Protein BAP2) (Fas ligand-associated factor 3) (FLAF3) (Insulin receptor substrate p53/p58) (IRS-58) (IRSp53/58) (Insulin receptor substrate protein of 53 kDa) (IRSp53) (Insulin receptor substrate p53)	BAIAP2	1.04694	1.02627	0.924945	-0.00152092		0.0168977	0.95073	0.923663	1.01741	-0.0905954		0.49465	1
P13987	CD59 glycoprotein (1F5 antigen) (20 kDa homologous restriction factor) (HRF-20) (HRF20) (MAC-inhibitory protein) (MAC-IP) (MEM43 antigen) (Membrane attack complex inhibition factor) (MACIF) (Membrane inhibitor of reactive lysis) (MIRL) (Protectin) (CD antigen CD59)	CD59 MIC11 MIN1 MIN2 MIN3 MSK21	0.706682	0.828105	0.724332	-0.699535	+	1.54687	1.26079	1.1404	1.13117	0.402887	+	1.36337	1
Q6Y7W6	GRB10-interacting GYF protein 2 (PERQ amino acid-rich with GYF domain-containing protein 2) (Trinucleotide repeat-containing gene 15 protein)	GIGYF2 KIAA0642 PERQ2 TNRC15	1.40845	0.715798	1.3393	0.354359		0.160626	1.19959	1.77795	1.2152	0.825578		0.875906	1
O75396	Vesicle-trafficking protein SEC22b (ER-Golgi SNARE of 24 kDa) (ERS-24) (ERS24) (SEC22 vesicle-trafficking protein homolog B) (SEC22 vesicle-trafficking protein-like 1)	SEC22B SEC22L1	1.07594	1.24186	0.923262	0.190619		0.3015	1.20089	1.11133	1.05788	0.286906		1.04845	1
Q12904	Aminoacyl tRNA synthase complex-interacting multifunctional protein 1 (Multisynthase complex auxiliary component p43) [Cleaved into: Endothelial monocyte-activating polypeptide 2 (EMAP-2) (Endothelial monocyte-activating polypeptide II) (EMAP-II) (Small inducible cytokine subfamily E member 1)]	AIMP1 EMAP2 SCYE1	1.06568	0.937945	1.01708	0.0169665		0.0475163	0.94	1.22254	0.853519	0.0131671		0.0188168	1
Q14789	Golgin subfamily B member 1 (372 kDa Golgi complex-associated protein) (GCP372) (Giantin) (Macrogolgin)	GOLGB1	1.03925	0.971893	1.12004	0.105548		0.375367	0.959593	1.00048	1.07536	0.0289629		0.108126	1
Q14677	Clathrin interactor 1 (Clathrin-interacting protein localized in the trans-Golgi region) (Clint) (Enthoprotin) (Epsin-4) (Epsin-related protein) (EpsinR)	CLINT1 ENTH EPN4 EPNR KIAA0171	1.21301	1.32378	1.1071	0.47955		1.18456	1.09023	0.896626	0.951499	-0.0512026		0.144476	1
Q7Z2W4	Zinc finger CCCH-type antiviral protein 1 (ADP-ribosyltransferase diphtheria toxin-like 13) (ARTD13) (Inactive Poly [ADP-ribose] polymerase 13) (PARP13) (Zinc finger CCCH domain-containing protein 2) (Zinc finger antiviral protein) (ZAP)	ZC3HAV1 ZC3HDC2 PRO1677	1.06065	0.978408	0.92898	-0.0264166		0.107002	0.95167	1.02714	0.883498	-0.115876		0.422685	1
P63000	Ras-related C3 botulinum toxin substrate 1 (EC 3.6.5.2) (Cell migration-inducing gene 5 protein) (Ras-like protein TC25) (p21-Rac1)	RAC1 TC25 MIG5	0.71921		0.640636	-0.95144		1.02526	0.852192		1.13337	-0.0178633		0.0348879	1
Q9P0L0	Vesicle-associated membrane protein-associated protein A (VAMP-A) (VAMP-associated protein A) (VAP-A) (33 kDa VAMP-associated protein) (VAP-33)	VAPA VAP33	0.704515	0.871928	1.07469	-0.304895		0.427218	0.968375	0.831195	1.01159	-0.160342		0.433011	1
Q99439	Calponin-2 (Calponin H2, smooth muscle) (Neutral calponin)	CNN2	1.11345	1.10408	1.10593	0.252533	+	3.19662	0.876929	1.04834	0.930176	-0.1218		0.371373	1
P30050	60S ribosomal protein L12 (Large ribosomal subunit protein uL11)	RPL12	0.827632	0.728075	0.882664	-0.51122		1.18507	1.06565	1.06203	1.06096	0.150406	+	3.31995	1
O14744	Protein arginine N-methyltransferase 5 (PRMT5) (EC 2.1.1.320) (72 kDa ICln-binding protein) (Histone-arginine N-methyltransferase PRMT5) (Jak-binding protein 1) (Shk1 kinase-binding protein 1 homolog) (SKB1 homolog) (SKB1Hs) [Cleaved into: Protein arginine N-methyltransferase 5, N-terminally processed]	PRMT5 HRMT1L5 IBP72 JBP1 SKB1	0.516602	0.820382		-0.993258		0.50225	0.74028	0.909732		-0.474431		0.514326	1
Q9Y314	Nitric oxide synthase-interacting protein (E3 ubiquitin-protein ligase NOSIP) (EC 2.3.2.27) (RING-type E3 ubiquitin transferase NOSIP) (eNOS-interacting protein)	NOSIP CGI-25	1.30409	1.18261	1.34741	0.605051	+	1.60412	1.25109	1.51579	1.4689	0.850769	+	1.53792	1
P61019	Ras-related protein Rab-2A (EC 3.6.5.2)	RAB2A RAB2	0.954529	0.910575	0.892617	-0.207682		1.29209	0.979283	0.972691	1.07293	0.0203919		0.0758017	1
P55735	Protein SEC13 homolog (GATOR complex protein SEC13) (SEC13-like protein 1) (SEC13-related protein)	SEC13 D3S1231E SEC13A SEC13L1 SEC13R	0.946668	1.06914	1.1446	0.128468		0.327577	1.31648	1.21669	0.882735	0.320197		0.352047	1
Q9H0U4	Ras-related protein Rab-1B (EC 3.6.5.2)	RAB1B	0.979978	1.05892	0.857474	-0.0866993		0.227458	0.981339	1.12619	1.03753	0.116456		0.429278	1
O94979	Protein transport protein Sec31A (ABP125) (ABP130) (SEC31-like protein 1) (SEC31-related protein A) (Web1-like protein)	SEC31A KIAA0905 SEC31L1 HSPC275 HSPC334	1.00735	0.98717	1.0111	0.00461948		0.0810129	1.07311	1.03714	0.82158	-0.0566887		0.121345	1
P53992	Protein transport protein Sec24C (SEC24-related protein C)	SEC24C KIAA0079	1.28964	1.04872	1.02144	0.279352		0.550605	0.951797	0.969971	0.921875	-0.132013		1.16429	1
Q9Y266	Nuclear migration protein nudC (Nuclear distribution protein C homolog)	NUDC	1.06228	1.21278	0.961585	0.187255		0.398445	1.04535	1.0777	1.09099	0.169974	+	1.4883	1
Q96AY3	Peptidyl-prolyl cis-trans isomerase FKBP10 (PPIase FKBP10) (EC 5.2.1.8) (65 kDa FK506-binding protein) (65 kDa FKBP) (FKBP-65) (FK506-binding protein 10) (FKBP-10) (Immunophilin FKBP65) (Rotamase)	FKBP10 FKBP65 PSEC0056	0.85779	0.909651	0.931876	-0.260475	+	1.30391	0.983684	0.979603	1.00436	-0.0267441		0.532629	1
O60488	Long-chain-fatty-acid--CoA ligase 4 (EC 6.2.1.3) (Arachidonate--CoA ligase) (EC 6.2.1.15) (Long-chain acyl-CoA synthetase 4) (LACS 4)	ACSL4 ACS4 FACL4 LACS4	0.985585	0.733121	1.00141	-0.241544		0.399104	0.927605	0.973115	1.0816	-0.0145786		0.0572607	1
P50570	Dynamin-2 (EC 3.6.5.5)	DNM2 DYN2	1.09186	0.979906	1.06917	0.113222		0.510579	1.00151	1.28537	0.929506	0.171774		0.219142	1
Q969X5	Endoplasmic reticulum-Golgi intermediate compartment protein 1 (ER-Golgi intermediate compartment 32 kDa protein) (ERGIC-32)	ERGIC1 ERGIC32 KIAA1181 HT034	1.1033		1.12793	0.269828		1.19344	1.07698		1.35872	0.486069		0.457304	1
Q9NP72	Ras-related protein Rab-18	RAB18	1.04403	1.01363	1.07003	0.102805		0.928312	0.978044	0.919974	1.0402	-0.0513228		0.223881	1
Q96HE7	ERO1-like protein alpha (ERO1-L) (ERO1-L-alpha) (EC 1.8.4.-) (Endoplasmic oxidoreductin-1-like protein) (Endoplasmic reticulum oxidoreductase alpha) (Oxidoreductin-1-L-alpha)	ERO1A ERO1L UNQ434/PRO865	0.902406	1.04331	0.957022	-0.0812804		0.304201	1.48669	1.21526	1.27639	0.696113	+	1.35305	1
P54920	Alpha-soluble NSF attachment protein (SNAP-alpha) (N-ethylmaleimide-sensitive factor attachment protein alpha)	NAPA SNAPA	1.09061	0.935014	1.05712	0.0670972		0.188769	1.00999	1.01314	0.926356	-0.0418839		0.218132	1
P25398	40S ribosomal protein S12 (Small ribosomal subunit protein eS12)	RPS12	0.938462	0.912794	0.900955	-0.212614	+	1.72473	1.06361	1.30536	1.1071	0.363257		0.8253	1
Q13362	Serine/threonine-protein phosphatase 2A 56 kDa regulatory subunit gamma isoform (PP2A B subunit isoform B'-gamma) (PP2A B subunit isoform B56-gamma) (PP2A B subunit isoform PR61-gamma) (PP2A B subunit isoform R5-gamma) (Renal carcinoma antigen NY-REN-29)	PPP2R5C KIAA0044	1.03614	0.979558	0.918206	-0.0549453		0.2439	0.932826	0.99696	0.895632	-0.147869		0.720375	1
P46459	Vesicle-fusing ATPase (EC 3.6.4.6) (N-ethylmaleimide-sensitive fusion protein) (NEM-sensitive fusion protein) (Vesicular-fusion protein NSF)	NSF	1.07058	0.992322	0.755461	-0.154035		0.251675	1.08945	1.0935	0.837853	0.0170424		0.00216162	1
Q13907	Isopentenyl-diphosphate Delta-isomerase 1 (EC 5.3.3.2) (Isopentenyl pyrophosphate isomerase 1) (IPP isomerase 1) (IPPI1)	IDI1	0.953265			-0.118042			1.1865			0.421761			1
P61026	Ras-related protein Rab-10 (EC 3.6.5.2)	RAB10	1.05874	1.14683	1.06981	0.2166		1.13225	1.095	1.04424	1.06223	0.160304	+	1.36701	1
O14672	Disintegrin and metalloproteinase domain-containing protein 10 (ADAM 10) (EC 3.4.24.81) (CDw156) (Kuzbanian protein homolog) (Mammalian disintegrin-metalloprotease) (CD antigen CD156c)	ADAM10 KUZ MADM	1.27841	1.22701		0.555689		1.23755	1.02322	0.927421		-0.0616344		0.162261	1
Q9NY61	Protein AATF (Apoptosis-antagonizing transcription factor) (Rb-binding protein Che-1)	AATF CHE1 DED HSPC277	1.34992	1.12397		0.524448		0.579158	1.01707	0.945807		-0.0462114		0.162581	1
Q13618	Cullin-3 (CUL-3)	CUL3 KIAA0617	0.64341	0.702617	0.820196	-0.803097	+	1.36572	0.98663	0.976729	0.886095	-0.126977		0.577984	1
Q9BUP3	Oxidoreductase HTATIP2 (EC 1.1.1.-) (30 kDa HIV-1 TAT-interacting protein) (HIV-1 TAT-interactive protein 2)	HTATIP2 CC3 TIP30	0.930447	0.650377		-0.580078		0.404172	1.02175	1.13449		0.185504		0.406165	1
Q9UJU6	Drebrin-like protein (Cervical SH3P7) (Cervical mucin-associated protein) (Drebrin-F) (HPK1-interacting protein of 55 kDa) (HIP-55) (SH3 domain-containing protein 7)	DBNL CMAP SH3P7 PP5423	0.717981	0.874816	0.900549	-0.456233		0.933936	0.924887	0.971443	0.848957	-0.218827		0.826985	1
Q01968	Inositol polyphosphate 5-phosphatase OCRL (EC 3.1.3.36) (EC 3.1.3.56) (Inositol polyphosphate 5-phosphatase OCRL-1) (OCRL-1) (Lowe oculocerebrorenal syndrome protein) (Phosphatidylinositol 3,4,5-triphosphate 5-phosphatase) (EC 3.1.3.86)	OCRL OCRL1	1.3741	1.34171		0.754544	+	1.60538	0.927684	0.887411		-0.239254		0.845215	1
P52943	Cysteine-rich protein 2 (CRP-2) (Protein ESP1)	CRIP2 CRP2	0.485405	0.405729		-1.99378		1.15511	0.767192	1.06104		-0.221463		0.193797	1
Q13492	Phosphatidylinositol-binding clathrin assembly protein (Clathrin assembly lymphoid myeloid leukemia protein)	PICALM CALM	1.32379	1.028	1.17425	0.398465		0.780445	1.0332	1.07534	0.98417	0.0750626		0.43777	1
Q13190	Syntaxin-5	STX5 STX5A	1.07117			0.169572			0.939796			-0.15314			1
Q9BVK6	Transmembrane emp24 domain-containing protein 9 (GMP25) (Glycoprotein 25L2) (p24 family protein alpha-2) (p24alpha2) (p25)	TMED9 GP25L2	0.644531	0.688629		-1.00032		1.28606	0.761915	0.806552		-0.59943		1.13017	1
P63172	Dynein light chain Tctex-type 1 (Protein CW-1) (T-complex testis-specific protein 1 homolog)	DYNLT1 TCTEL1 TCTEX-1 TCTEX1	0.807643	1.24746	1.09645	0.12155		0.0857031	1.06082	0.894524	0.978733	-0.054802		0.176228	1
Q9UNZ2	NSFL1 cofactor p47 (UBX domain-containing protein 2C) (p97 cofactor p47)	NSFL1C UBXN2C	1.21695	0.956591	1.26536	0.33675		0.556046	0.92953	0.977018	1.07008	-0.0192911		0.0764229	1
P62820	Ras-related protein Rab-1A (EC 3.6.5.2) (YPT1-related protein)	RAB1A RAB1	1.00829			0.0203702			1.03005			0.0730132			1
Q9NR31	GTP-binding protein SAR1a (COPII-associated small GTPase)	SAR1A SAR1 SARA SARA1	1.13976	1.09026	1.21184	0.338868	+	1.32862	0.96708	1.32078	1.16127	0.344073		0.547702	1
P20340	Ras-related protein Rab-6A (Rab-6)	RAB6A RAB6	0.980317	1.00651	1.08105	0.0551861		0.269089	0.984189	0.965917	1.0936	0.0356695		0.113868	1
Q9Y5L0	Transportin-3 (Importin-12) (Imp12) (Transportin-SR) (TRN-SR)	TNPO3 IPO12	1.01942			0.0474401			1.08207			0.194537			1
Q01970	1-phosphatidylinositol 4,5-bisphosphate phosphodiesterase beta-3 (EC 3.1.4.11) (Phosphoinositide phospholipase C-beta-3) (Phospholipase C-beta-3) (PLC-beta-3)	PLCB3	0.936742		1.01728	-0.0573594		0.178332	1.96662		0.989785	0.963895		0.292716	1
Q56VL3	OCIA domain-containing protein 2 (Ovarian carcinoma immunoreactive antigen-like protein)	OCIAD2	1.34117	1.02972	0.938672	0.242196		0.298125	0.973348	1.02737	0.927659	-0.0595983		0.313999	1
Q07960	Rho GTPase-activating protein 1 (CDC42 GTPase-activating protein) (GTPase-activating protein rhoGAP) (Rho-related small GTPase protein activator) (Rho-type GTPase-activating protein 1) (p50-RhoGAP)	ARHGAP1 CDC42GAP RHOGAP1	0.9117	1.02147	1.10152	0.0283521		0.049945	1.06426	0.889401	0.942422	-0.0869484		0.26256	1
Q15691	Microtubule-associated protein RP/EB family member 1 (APC-binding protein EB1) (End-binding protein 1) (EB1)	MAPRE1	1.50986	0.966142	1.05516	0.402043		0.394912	1.08615	1.00475	1.01052	0.0820012		0.490903	1
Q8NBJ4	Golgi membrane protein 1 (Golgi membrane protein GP73) (Golgi phosphoprotein 2)	GOLM1 C9orf155 GOLPH2 PSEC0242 UNQ686/PRO1326	0.965562	1.02206	0.980604	-0.0262622		0.232554	1.1838	1.16186	1.10543	0.345472	+	1.68287	1
P11717	Cation-independent mannose-6-phosphate receptor (CI Man-6-P receptor) (CI-MPR) (M6PR) (300 kDa mannose 6-phosphate receptor) (MPR 300) (Insulin-like growth factor 2 receptor) (Insulin-like growth factor II receptor) (IGF-II receptor) (M6P/IGF2 receptor) (M6P/IGF2R) (CD antigen CD222)	IGF2R MPRI	1.22809		1.38881	0.663045		0.841231	1.47031		1.06733	0.587196		0.405172	1
P49257	Protein ERGIC-53 (ER-Golgi intermediate compartment 53 kDa protein) (Gp58) (Intracellular mannose-specific lectin MR60) (Lectin mannose-binding 1)	LMAN1 ERGIC53 F5F8D	1.27623		0.935207	0.247851		0.173515	0.815088		0.842094	-0.463736		1.25959	1
P11172	Uridine 5'-monophosphate synthase (UMP synthase) [Includes: Orotate phosphoribosyltransferase (OPRT) (OPRTase) (EC 2.4.2.10); Orotidine 5'-phosphate decarboxylase (ODC) (OMPD) (EC 4.1.1.23) (OMPdecase)]	UMPS OK/SW-cl.21	1.22969	1.07173	1.16349	0.355334		1.15258	0.878736	0.972702	0.888751	-0.223412		0.982232	1
Q8IWE2	Protein NOXP20 (Nervous system overexpressed protein 20) (Protein FAM114A1)	FAM114A1 NOXP20	1.56778			1.109			0.93511			-0.165466			1
Q9P2B2	Prostaglandin F2 receptor negative regulator (CD9 partner 1) (CD9P-1) (Glu-Trp-Ile EWI motif-containing protein F) (EWI-F) (Prostaglandin F2-alpha receptor regulatory protein) (Prostaglandin F2-alpha receptor-associated protein) (CD antigen CD315)	PTGFRN CD9P1 EWIF FPRP KIAA1436	1.09266	1.0927	1.10234	0.22585	+	2.98933	1.06247	1.00363	1.04873	0.0926405		0.787419	1
O95292	Vesicle-associated membrane protein-associated protein B/C (VAMP-B/VAMP-C) (VAMP-associated protein B/C) (VAP-B/VAP-C)	VAPB UNQ484/PRO983	1.08055	1.09828		0.21122		1.21928	1.00959	0.999165		0.0107749		0.255244	1
P28482	Mitogen-activated protein kinase 1 (MAP kinase 1) (MAPK 1) (EC 2.7.11.24) (ERT1) (Extracellular signal-regulated kinase 2) (ERK-2) (MAP kinase isoform p42) (p42-MAPK) (Mitogen-activated protein kinase 2) (MAP kinase 2) (MAPK 2)	MAPK1 ERK2 PRKM1 PRKM2	1.06746		0.942926	0.0127729		0.0147515	0.856525		0.974642	-0.217512		0.402996	1
P13861	cAMP-dependent protein kinase type II-alpha regulatory subunit	PRKAR2A PKR2 PRKAR2	1.34442		1.17996	0.574278		0.755873	0.978187		0.988329	-0.0416406		0.724482	1
Q8WVM8	Sec1 family domain-containing protein 1 (SLY1 homolog) (Sly1p) (Syntaxin-binding protein 1-like 2)	SCFD1 C14orf163 KIAA0917 STXBP1L2 FKSG23	1.00191	1.11702	0.791076	-0.0751149		0.137445	1.12142	0.961652	0.892663	-0.0200321		0.0616633	1
P42166	Lamina-associated polypeptide 2, isoform alpha (Thymopoietin isoform alpha) (TP alpha) (Thymopoietin-related peptide isoform alpha) (TPRP isoform alpha) [Cleaved into: Thymopoietin (TP) (Splenin); Thymopentin (TP5)]	TMPO LAP2	0.680081	0.778887	0.681024	-0.833142	+	1.76763	0.969032	0.984016	0.963844	-0.0692879	+	1.34316	1
O43823	A-kinase anchor protein 8 (AKAP-8) (A-kinase anchor protein 95 kDa) (AKAP 95)	AKAP8 AKAP95	1.06576			0.157076			0.900085			-0.259617			1
P49755	Transmembrane emp24 domain-containing protein 10 (Protein TMED10) (21 kDa transmembrane-trafficking protein) (S31I125) (S31III125) (Tmp-21-I) (Transmembrane protein Tmp21) (p23) (p24 family protein delta-1) (p24delta1) (p24delta)	TMED10 TMP21	0.915207	1.20358	1.05158	0.136229		0.222808	1.02056	0.893299	0.847431	-0.204488		0.584646	1
P61006	Ras-related protein Rab-8A (EC 3.6.5.2) (Oncogene c-mel)	RAB8A MEL RAB8	1.09735		1.01689	0.137004		0.412907	0.913571		0.985596	-0.127586		0.39937	1
P36507	Dual specificity mitogen-activated protein kinase kinase 2 (MAP kinase kinase 2) (MAPKK 2) (EC 2.7.12.2) (ERK activator kinase 2) (MAPK/ERK kinase 2) (MEK 2)	MAP2K2 MEK2 MKK2 PRKMK2	0.85697			-0.38068			0.923002			-0.19761			1
Q08379	Golgin subfamily A member 2 (130 kDa cis-Golgi matrix protein) (GM130) (GM130 autoantigen) (Golgin-95)	GOLGA2	1.18045	1.04866		0.267483		0.49159	1.07813	0.839555		-0.103653		0.119974	1
Q12907	Vesicular integral-membrane protein VIP36 (Glycoprotein GP36b) (Lectin mannose-binding 2) (Vesicular integral-membrane protein 36) (VIP36)	LMAN2 C5orf8	1.03911	1.06136	0.973673	0.0602163		0.340406	0.804378	0.782559	0.868653	-0.493865	+	1.63349	1
O14579	Coatomer subunit epsilon (Epsilon-coat protein) (Epsilon-COP)	COPE	1.18155	0.884877	0.898545	-0.0289658		0.0730618	0.916501	0.942106	0.988147	-0.129315		0.860695	1
O15260	Surfeit locus protein 4	SURF4 SURF-4	1.2653	1.07578	1.01606	0.277402		0.616755	0.996041	0.890496	1.02858	-0.070787		0.254647	1
Q7Z460	CLIP-associating protein 1 (Cytoplasmic linker-associated protein 1) (Multiple asters homolog 1) (Protein Orbit homolog 1) (hOrbit1)	CLASP1 KIAA0622 MAST1	1.16531	1.08547	1.25269	0.382622		1.18304	1.08282	0.931341	0.995749	0.00813082		0.00991517	1
O14828	Secretory carrier-associated membrane protein 3 (Secretory carrier membrane protein 3)	SCAMP3 C1orf3 PROPIN1	1.3643	1.23672	1.15573	0.554778	+	1.35895	0.966979	0.99523	1.07241	0.0282983		0.116011	1
P07108	Acyl-CoA-binding protein (ACBP) (Diazepam-binding inhibitor) (DBI) (Endozepine) (EP)	DBI	0.808506	0.805295	0.950939	-0.386606		0.999537	1.01782	1.13438	0.890796	0.0350941		0.0430404	1
Q7L5N7	Lysophosphatidylcholine acyltransferase 2 (LPC acyltransferase 2) (LPCAT-2) (LysoPC acyltransferase 2) (EC 2.3.1.23) (1-acylglycerol-3-phosphate O-acyltransferase 11) (1-AGP acyltransferase 11) (1-AGPAT 11) (EC 2.3.1.51) (1-acylglycerophosphocholine O-acyltransferase) (1-alkenylglycerophosphocholine O-acyltransferase) (EC 2.3.1.25) (1-alkylglycerophosphocholine O-acetyltransferase) (EC 2.3.1.67) …	LPCAT2 AGPAT11 AYTL1	1.10877	1.08057		0.223087		1.04504	1.20924	0.985796		0.229494		0.261342	1
P35613	Basigin (5F7) (Collagenase stimulatory factor) (Extracellular matrix metalloproteinase inducer) (EMMPRIN) (Hepatoma-associated antigen) (HAb18G) (Leukocyte activation antigen M6) (OK blood group antigen) (Tumor cell-derived collagenase stimulatory factor) (TCSF) (CD antigen CD147)	BSG UNQ6505/PRO21383	0.877433	0.901037	0.867373	-0.309824	+	2.10012	1.20694	1.11752	1.24432	0.428176	+	1.48603	1
P21399	Cytoplasmic aconitate hydratase (Aconitase) (EC 4.2.1.3) (Citrate hydro-lyase) (Ferritin repressor protein) (Iron regulatory protein 1) (IRP1) (Iron-responsive element-binding protein 1) (IRE-BP 1)	ACO1 IREB1	1.42179	1.33182	2.04519	1.15856		1.1113	0.759165	0.919135	0.700526	-0.572195		1.01064	1
P16070	CD44 antigen (CDw44) (Epican) (Extracellular matrix receptor III) (ECMR-III) (GP90 lymphocyte homing/adhesion receptor) (HUTCH-I) (Heparan sulfate proteoglycan) (Hermes antigen) (Hyaluronate receptor) (Phagocytic glycoprotein 1) (PGP-1) (Phagocytic glycoprotein I) (PGP-I) (CD antigen CD44)	CD44 LHR MDU2 MDU3 MIC4	0.928062	0.965999	0.781042	-0.282699		0.677675	1.08789	1.03711	1.23314	0.27814		0.778313	1
Q6NUQ4	Transmembrane protein 214	TMEM214 PP446	1.09468			0.223105			1.0348			0.084373			1
P11166	Solute carrier family 2, facilitated glucose transporter member 1 (Glucose transporter type 1, erythrocyte/brain) (GLUT-1) (HepG2 glucose transporter)	SLC2A1 GLUT1	0.829694	0.971156		-0.258687		0.396849	1.94708	1.59526		1.40984		0.955418	1
O60437	Periplakin (190 kDa paraneoplastic pemphigus antigen) (195 kDa cornified envelope precursor protein)	PPL KIAA0568	1.01833	0.831203	0.853912	-0.256706		0.635849	1.02313	1.05919	0.911414	-0.00515853		0.0287928	1
Q68CQ4	U3 small nucleolar RNA-associated protein 25 homolog (Digestive organ expansion factor homolog) (UTP25 small subunit processor component)	UTP25 C1orf107 DEF DIEXF	1.10534	1.20859	1.08121	0.305159		1.15957	1.35157	0.902098	1.14502	0.307737		0.353351	1
Q99598	Translin-associated protein X (Translin-associated factor X)	TSNAX TRAX	0.949361			-0.128165			0.928824			-0.182103			1
O43488	Aflatoxin B1 aldehyde reductase member 2 (EC 1.1.1.n11) (AFB1 aldehyde reductase 1) (AFB1-AR 1) (Aldoketoreductase 7) (Succinic semialdehyde reductase) (SSA reductase)	AKR7A2 AFAR AFAR1 AKR7	0.909938			-0.232766			1.015			0.0367301			1
Q99805	Transmembrane 9 superfamily member 2 (p76)	TM9SF2	0.602076	1.04616	1.06948	-0.243722		0.254888	1.00481	1.04202	1.1031	0.120282		0.659554	1
Q08722	Leukocyte surface antigen CD47 (Antigenic surface determinant protein OA3) (Integrin-associated protein) (IAP) (Protein MER6) (CD antigen CD47)	CD47 MER6	1.1784	1.51458	1.0863	0.569527		0.801096	1.23685	0.984971	0.958859	0.144235		0.231433	1
Q8TB61	Adenosine 3'-phospho 5'-phosphosulfate transporter 1 (PAPS transporter 1) (Putative MAPK-activating protein PM15) (Putative NF-kappa-B-activating protein 48) (Solute carrier family 35 member B2)	SLC35B2 PAPST1 PSEC0149	0.806653	0.788143	0.722798	-0.636511	+	1.79044	1.05217	0.853267	1.06446	-0.0248766		0.0691427	1
O15533	Tapasin (TPN) (TPSN) (NGS-17) (TAP-associated protein) (TAP-binding protein)	TAPBP NGS17 TAPA	0.765954		0.586862	-0.964224		0.688904	1.10076		0.977412	0.0945627		0.187931	1
Q10471	Polypeptide N-acetylgalactosaminyltransferase 2 (EC 2.4.1.41) (Polypeptide GalNAc transferase 2) (GalNAc-T2) (pp-GaNTase 2) (Protein-UDP acetylgalactosaminyltransferase 2) (UDP-GalNAc:polypeptide N-acetylgalactosaminyltransferase 2) [Cleaved into: Polypeptide N-acetylgalactosaminyltransferase 2 soluble form]	GALNT2	1.17383	1.07458		0.28875		0.635553	1.00617	0.944427		-0.0616893		0.245499	1
Q14376	UDP-glucose 4-epimerase (EC 5.1.3.2) (Galactowaldenase) (UDP-N-acetylgalactosamine 4-epimerase) (UDP-GalNAc 4-epimerase) (UDP-N-acetylglucosamine 4-epimerase) (UDP-GlcNAc 4-epimerase) (EC 5.1.3.7) (UDP-galactose 4-epimerase)	GALE	0.884944			-0.30146			0.957503			-0.107102			1
Q9BTU6	Phosphatidylinositol 4-kinase type 2-alpha (EC 2.7.1.67) (Phosphatidylinositol 4-kinase type II-alpha)	PI4K2A	0.899227	1.00182		-0.125144		0.291655	1.08108	0.901584		-0.0214659		0.0406256	1
Q5H9R7	Serine/threonine-protein phosphatase 6 regulatory subunit 3 (SAPS domain family member 3) (Sporulation-induced transcript 4-associated protein SAPL)	PPP6R3 C11orf23 KIAA1558 PP6R3 SAPL SAPS3	0.695083			-0.897052			1.78977			1.4356			1
Q03135	Caveolin-1	CAV1 CAV	0.626378	0.529525	0.650852	-1.25061	+	1.82321	0.962205	0.957032	1.00351	-0.0643429		0.655106	1
Q6IAA8	Ragulator complex protein LAMTOR1 (Late endosomal/lysosomal adaptor and MAPK and MTOR activator 1) (Lipid raft adaptor protein p18) (Protein associated with DRMs and endosomes) (p27Kip1-releasing factor from RhoA) (p27RF-Rho)	LAMTOR1 C11orf59 PDRO PP7157	1.03848		0.89664	-0.0813308		0.147446	1.14779		1.03715	0.218122		0.474559	1
P80303	Nucleobindin-2 (DNA-binding protein NEFA) (Epididymis secretory protein Li 109) (Gastric cancer antigen Zg4) (Prepronesfatin) [Cleaved into: Nesfatin-1]	NUCB2 NEFA	1.01333		1.07227	0.103361		0.419538	0.90563		0.850715	-0.320403		0.824305	1
P67812	Signal peptidase complex catalytic subunit SEC11A (EC 3.4.21.89) (Endopeptidase SP18) (Microsomal signal peptidase 18 kDa subunit) (SPase 18 kDa subunit) (SEC11 homolog A) (SEC11-like protein 1) (SPC18)	SEC11A SEC11L1 SPC18 SPCS4A	0.9178			-0.211549			0.961419			-0.0970357			1
O43290	U4/U6.U5 tri-snRNP-associated protein 1 (SNU66 homolog) (hSnu66) (Squamous cell carcinoma antigen recognized by T-cells 1) (SART-1) (hSART-1) (U4/U6.U5 tri-snRNP-associated 110 kDa protein) (allergen Hom s 1)	SART1	1.02647	1.22746	0.874389	0.103293		0.111778	0.914967	0.973779	0.825084	-0.24725		0.775234	1
Q15042	Rab3 GTPase-activating protein catalytic subunit (RAB3 GTPase-activating protein 130 kDa subunit) (Rab3-GAP p130) (Rab3-GAP)	RAB3GAP1 KIAA0066 RAB3GAP	1.04156			0.100422			0.926889			-0.187244			1
Q5BKZ1	DBIRD complex subunit ZNF326 (Zinc finger protein 326) (Zinc finger protein interacting with mRNPs and DBC1)	ZNF326 ZIRD	0.951878		0.950126	-0.123904	+	1.93288	0.944059		1.03414	-0.0270314		0.0777421	1
Q9BXB4	Oxysterol-binding protein-related protein 11 (ORP-11) (OSBP-related protein 11)	OSBPL11 ORP11 OSBP12	1.16419		1.2448	0.458885		0.944421	0.95951		0.901546	-0.177582		0.587671	1
P41250	Glycine--tRNA ligase (EC 6.1.1.14) (Diadenosine tetraphosphate synthetase) (Ap4A synthetase) (EC 2.7.7.-) (Glycyl-tRNA synthetase) (GlyRS) (Glycyl-tRNA synthetase 1)	GARS1 GARS	0.922309	0.805069	0.950521	-0.280122		0.821426	1.10488	0.961039	0.895259	-0.0321206		0.0913255	1
Q96LB3	Intraflagellar transport protein 74 homolog (Capillary morphogenesis gene 1 protein) (CMG-1) (Coiled-coil domain-containing protein 2)	IFT74 CCDC2 CMG1	1.40589			0.840204			0.807115			-0.528502			1
Q8IX12	Cell division cycle and apoptosis regulator protein 1 (Cell cycle and apoptosis regulatory protein 1) (CARP-1) (Death inducer with SAP domain)	CCAR1 CARP1 DIS	0.999085	0.804744	0.834019	-0.317286		0.733062	1.25637	1.14427	0.908831	0.242129		0.344783	1
Q9UM54	Unconventional myosin-VI (Unconventional myosin-6)	MYO6 KIAA0389	0.72992	0.952774	1.03303	-0.245528		0.393985	1.27069	0.974947	1.08567	0.258348		0.484485	1
O15066	Kinesin-like protein KIF3B (HH0048) (Microtubule plus end-directed kinesin motor 3B) [Cleaved into: Kinesin-like protein KIF3B, N-terminally processed]	KIF3B KIAA0359	1.17735			0.402662			0.993901			-0.0150883			1
Q9NX40	OCIA domain-containing protein 1 (Ovarian cancer immunoreactive antigen domain containing 1) (Ovarian carcinoma immunoreactive antigen)	OCIAD1 ASRIJ OCIA	0.971693			-0.07082			1.14592			0.335931			1
O95372	Acyl-protein thioesterase 2 (APT-2) (EC 3.1.2.-) (Lysophospholipase II) (LPL-II) (LysoPLA II) (Palmitoyl-protein hydrolase) (EC 3.1.2.22)	LYPLA2 APT2	1.43188	1.06437	1.21923	0.527538		0.861406	1.06614	1.18287	0.98636	0.186282		0.521456	1
Q9BS26	Endoplasmic reticulum resident protein 44 (ER protein 44) (ERp44) (Thioredoxin domain-containing protein 4)	ERP44 KIAA0573 TXNDC4 UNQ532/PRO1075	0.953341		1.01388	-0.0407572		0.168265	0.759252		0.842725	-0.547294		0.83538	1
O15027	Protein transport protein Sec16A (SEC16 homolog A) (p250)	SEC16A KIAA0310 SEC16 SEC16L	1.0831			0.196876			0.82647			-0.470057			1
Q02818	Nucleobindin-1 (CALNUC)	NUCB1 NUC	0.402516	0.534873	0.706257	-1.48396		1.21609	0.725526	0.680874	0.883991	-0.66563		1.1407	1
Q9BTV4	Transmembrane protein 43 (Protein LUMA)	TMEM43 UNQ2564/PRO6244	1.03122	0.980049	0.992106	0.0027744		0.0181517	1.12563	1.07114	1.11049	0.240485	+	1.64978	1
P46926	Glucosamine-6-phosphate isomerase 1 (EC 3.5.99.6) (Glucosamine-6-phosphate deaminase 1) (GNPDA 1) (GlcN6P deaminase 1) (Oscillin)	GNPDA1 GNPI HLN KIAA0060	1.20238	1.3481	0.917412	0.357447		0.436381	1.11603	0.96595	1.02704	0.0880403		0.298843	1
P35241	Radixin	RDX		1.24756	1.38398	0.676805		0.922504		0.985888	1.33314	0.365013		0.274544	1
P22392	Nucleoside diphosphate kinase B (NDK B) (NDP kinase B) (EC 2.7.4.6) (C-myc purine-binding transcription factor PUF) (Histidine protein kinase NDKB) (EC 2.7.13.3) (nm23-H2)	NME2 NM23B		0.978285	1.04602	0.0297891		0.102916		0.955331	1.12792	0.100587		0.136099	1
P10768	S-formylglutathione hydrolase (FGH) (EC 3.1.2.12) (Esterase D) (Methylumbelliferyl-acetate deacetylase) (EC 3.1.1.56)	ESD		0.92525	1.24209	0.198173		0.143231		0.866413	0.960464	-0.223297		0.487554	1
P84077	ADP-ribosylation factor 1 (EC 3.6.5.2)	ARF1		0.934533		-0.16699				1.151		0.346833			1
P52701	DNA mismatch repair protein Msh6 (hMSH6) (G/T mismatch-binding protein) (GTBP) (GTMBP) (MutS protein homolog 6) (MutS-alpha 160 kDa subunit) (p160)	MSH6 GTBP		0.857984		-0.377763				0.98907		-0.0271042			1
P10321	HLA class I histocompatibility antigen, C alpha chain (HLA-C) (HLA-Cw) (Human leukocyte antigen C)	HLA-C HLAC		1.1855		0.419669				1.12444		0.28926			1
Q9Y3B3	Transmembrane emp24 domain-containing protein 7 (p24 family protein gamma-3) (p24gamma3) (p27)	TMED7 CGI-109		0.81785		-0.495916				0.85247		-0.393664			1
Q9Y6Q5	AP-1 complex subunit mu-2 (AP-mu chain family member mu1B) (Adaptor protein complex AP-1 subunit mu-2) (Adaptor-related protein complex 1 subunit mu-2) (Clathrin assembly protein complex 1 mu-2 medium chain 2) (Golgi adaptor HA1/AP1 adaptin mu-2 subunit) (Mu-adaptin 2) (Mu1B-adaptin)	AP1M2		0.613922	0.618082	-1.19494	+	2.353		1.06199	0.932034	-0.00738631		0.0222174	1
O00203	AP-3 complex subunit beta-1 (Adaptor protein complex AP-3 subunit beta-1) (Adaptor-related protein complex 3 subunit beta-1) (Beta-3A-adaptin) (Clathrin assembly protein complex 3 beta-1 large chain)	AP3B1 ADTB3A		0.914871		-0.219432				0.970303		-0.0743505			1
Q92538	Golgi-specific brefeldin A-resistance guanine nucleotide exchange factor 1 (BFA-resistant GEF 1)	GBF1 KIAA0248		1.1154	0.92132	0.0448672		0.0410473		0.863061	0.878926	-0.340647	+	1.37772	1
Q96EE3	Nucleoporin SEH1 (GATOR complex protein SEH1) (Nup107-160 subcomplex subunit SEH1) (SEC13-like protein)	SEH1L SEC13L SEH1		0.959106		-0.102976				1.03132		0.0760508			1
Q9Y5X1	Sorting nexin-9 (SH3 and PX domain-containing protein 1) (Protein SDP1) (SH3 and PX domain-containing protein 3A)	SNX9 SH3PX1 SH3PXD3A		1.03782	1.23406	0.314363		0.410316		1.15688	0.995045	0.180571		0.282588	1
O95861	3'(2'),5'-bisphosphate nucleotidase 1 (EC 3.1.3.7) (Bisphosphate 3'-nucleotidase 1) (PAP-inositol 1,4-phosphatase) (PIP)	BPNT1		1.08888	1.10387	0.226928	+	1.32585		0.77336	0.804667	-0.584443		1.2746	1
P41743	Protein kinase C iota type (EC 2.7.11.13) (Atypical protein kinase C-lambda/iota) (PRKC-lambda/iota) (aPKC-lambda/iota) (nPKC-iota)	PRKCI DXS1179E		0.828509	1.04893	-0.15597		0.181577		0.950649	0.916616	-0.169368		0.783067	1
Q5VW32	BRO1 domain-containing protein BROX (BRO1 domain- and CAAX motif-containing protein)	BROX BROFTI C1orf58		0.993988	0.989789	-0.0200872		0.790942		0.997934	0.940346	-0.0773081		0.320022	1
P54725	UV excision repair protein RAD23 homolog A (HR23A) (hHR23A)	RAD23A		0.937991		-0.157881				0.807877		-0.526176			1
P12830	Cadherin-1 (CAM 120/80) (Epithelial cadherin) (E-cadherin) (Uvomorulin) (CD antigen CD324) [Cleaved into: E-Cad/CTF1; E-Cad/CTF2; E-Cad/CTF3]	CDH1 CDHE UVO		1.01573	1.21509	0.269374		0.34764		1.09894	0.892216	-0.0109359		0.0268814	1
Q6IBS0	Twinfilin-2 (A6-related protein) (hA6RP) (Protein tyrosine kinase 9-like) (Twinfilin-1-like protein)	TWF2 PTK9L MSTP011		1.38203		0.797982				0.877414		-0.322533			1
P22059	Oxysterol-binding protein 1	OSBP OSBP1		0.888626	1.01845	-0.117337		0.223453		1.27439	1.16516	0.489971		0.848023	1
Q86SF2	N-acetylgalactosaminyltransferase 7 (EC 2.4.1.41) (Polypeptide GalNAc transferase 7) (GalNAc-T7) (pp-GaNTase 7) (Protein-UDP acetylgalactosaminyltransferase 7) (UDP-GalNAc:polypeptide N-acetylgalactosaminyltransferase 7)	GALNT7		1.08106	0.860716	-0.0728656		0.0941542		1.02227	0.858238	-0.151937		0.228344	1
Q92896	Golgi apparatus protein 1 (CFR-1) (Cysteine-rich fibroblast growth factor receptor) (E-selectin ligand 1) (ESL-1) (Golgi sialoglycoprotein MG-160)	GLG1 CFR1 ESL1 MG160		1.03239		0.0786057				0.695247		-0.896471			1
Q9UP83	Conserved oligomeric Golgi complex subunit 5 (COG complex subunit 5) (13S Golgi transport complex 90 kDa subunit) (GTC-90) (Component of oligomeric Golgi complex 5) (Golgi transport complex 1)	COG5 GOLTC1 GTC90		0.966027		-0.0852451				0.919137		-0.207959			1
O60568	Multifunctional procollagen lysine hydroxylase and glycosyltransferase LH3 [Includes: Procollagen-lysine,2-oxoglutarate 5-dioxygenase 3 (EC 1.14.11.4) (Lysyl hydroxylase 3) (LH3); Procollagen glycosyltransferase (EC 2.4.1.50) (EC 2.4.1.66) (Galactosylhydroxylysine-glucosyltransferase) (Procollagen galactosyltransferase) (Procollagen glucosyltransferase)]	PLOD3		1.44725	1.08393	0.58091		0.439675		0.916739	1.03902	-0.0551699		0.11688	1
Q9H9E3	Conserved oligomeric Golgi complex subunit 4 (COG complex subunit 4) (Component of oligomeric Golgi complex 4)	COG4		1.09985		0.234725				0.911139		-0.229515			1
Q08378	Golgin subfamily A member 3 (Golgi complex-associated protein of 170 kDa) (GCP170) (Golgin-160)	GOLGA3		0.858168		-0.377235				0.955466		-0.112356			1
Q96EK6	Glucosamine 6-phosphate N-acetyltransferase (EC 2.3.1.4) (Phosphoglucosamine acetylase) (Phosphoglucosamine transacetylase)	GNPNAT1 GNA1		0.830252		-0.458796				0.973716		-0.0656905			1
Q9UM00	Calcium load-activated calcium channel (CLAC channel) (GEL complex subunit TMCO1) (Transmembrane and coiled-coil domain-containing protein 1) (Transmembrane and coiled-coil domains protein 4) (Xenogeneic cross-immune protein PCIA3)	TMCO1 TMCC4 PNAS-10 PNAS-136 UNQ151/PRO177		1.01699	0.790501	-0.249611		0.263173		0.982492	1.27293	0.296425		0.2624	1
A1L0T0	2-hydroxyacyl-CoA lyase 2 (EC 4.1.2.-) (Acetolactate synthase-like protein) (IlvB-like protein)	ILVBL AHAS HACL2		0.757179	0.84405	-0.548446		0.819542		1.08598	1.05966	0.173363		0.958186	1
O00178	GTP-binding protein 1 (G-protein 1) (GP-1) (GP1)	GTPBP1		1.15294		0.350996				0.877419		-0.322519			1
P61769	Beta-2-microglobulin [Cleaved into: Beta-2-microglobulin form pI 5.3]	B2M CDABP0092 HDCMA22P		1.08487	0.989016	0.0894719		0.232258		0.999358	1.11544	0.137645		0.297794	1
P67936	Tropomyosin alpha-4 chain (TM30p1) (Tropomyosin-4)	TPM4		1.06452	1.0074	0.0871294		0.371296		0.97434	1.01919	-0.00799239		0.0448252	1
O15212	Prefoldin subunit 6 (Protein Ke2)	PFDN6 HKE2 PFD6		1.03732	1.19764	0.27395		0.429005		0.821657	1.1879	0.0117618		0.0185467	1
Q8N6T3	ADP-ribosylation factor GTPase-activating protein 1 (ARF GAP 1) (ADP-ribosylation factor 1 GTPase-activating protein) (ARF1 GAP) (ARF1-directed GTPase-activating protein)	ARFGAP1 ARF1GAP		1.08362	0.937694	0.0261408		0.0315272		1.00834	1.07964	0.106173		0.365233	1
Q6P996	Pyridoxal-dependent decarboxylase domain-containing protein 1 (EC 4.1.1.-)	PDXDC1 KIAA0251		1.07792		0.185051				1.07703		0.183018			1
Q9NXH9	tRNA (guanine(26)-N(2))-dimethyltransferase (EC 2.1.1.216) (tRNA 2,2-dimethylguanosine-26 methyltransferase) (tRNA(guanine-26,N(2)-N(2)) methyltransferase) (tRNA(m(2,2)G26)dimethyltransferase)	TRMT1		0.882483		-0.308327				1.03736		0.0904509			1
P18858	DNA ligase 1 (EC 6.5.1.1) (DNA ligase I) (Polydeoxyribonucleotide synthase [ATP] 1)	LIG1		1.13306		0.30809				0.946858		-0.134676			1
Q96M27	Protein PRRC1 (Proline-rich and coiled-coil-containing protein 1)	PRRC1		0.990552		-0.0234127				0.974582		-0.063499			1
P53367	Arfaptin-1 (ADP-ribosylation factor-interacting protein 1)	ARFIP1		1.00538		0.0132398				1.06379		0.152521			1
Q15363	Transmembrane emp24 domain-containing protein 2 (Membrane protein p24A) (p24) (p24 family protein beta-1) (p24beta1)	TMED2 RNP24		0.679732	0.648298	-1.00983	+	1.43482		0.842139	0.906321	-0.331501		0.77215	1
Q15392	Delta(24)-sterol reductase (EC 1.3.1.72) (24-dehydrocholesterol reductase) (3-beta-hydroxysterol Delta-24-reductase) (Diminuto/dwarf1 homolog) (Seladin-1)	DHCR24 KIAA0018		1.9246	0.814524	0.775634		0.159072		1.00983	0.787174	-0.263965		0.279015	1
Q9GZZ9	Ubiquitin-like modifier-activating enzyme 5 (Ubiquitin-activating enzyme 5) (ThiFP1) (UFM1-activating enzyme) (Ubiquitin-activating enzyme E1 domain-containing protein 1)	UBA5 UBE1DC1		1.07451		0.177241				0.995904		-0.0101239			1
Q86WJ1	Chromodomain-helicase-DNA-binding protein 1-like (EC 3.6.4.-) (Amplified in liver cancer protein 1)	CHD1L ALC1		1.37745		0.789792				1.04096		0.098997			1
Q9P289	Serine/threonine-protein kinase 26 (EC 2.7.11.1) (MST3 and SOK1-related kinase) (Mammalian STE20-like protein kinase 4) (MST-4) (STE20-like kinase MST4) (Serine/threonine-protein kinase MASK)	STK26 MASK MST4		1.03239	1.23086	0.304968		0.394633		0.97133	1.07827	0.0604146		0.133989	1
Q9H2M9	Rab3 GTPase-activating protein non-catalytic subunit (RGAP-iso) (Rab3 GTPase-activating protein 150 kDa subunit) (Rab3-GAP p150) (Rab3-GAP150) (Rab3-GAP regulatory subunit)	RAB3GAP2 KIAA0839		1.05551		0.133231				1.0075		0.0184357			1
Q8NF37	Lysophosphatidylcholine acyltransferase 1 (LPC acyltransferase 1) (LPCAT-1) (LysoPC acyltransferase 1) (EC 2.3.1.23) (1-acylglycerol-3-phosphate O-acyltransferase) (EC 2.3.1.51) (1-acylglycerophosphocholine O-acyltransferase) (1-alkenylglycerophosphocholine O-acyltransferase) (EC 2.3.1.25) (1-alkylglycerophosphocholine O-acetyltransferase) (EC 2.3.1.67) (Acetyl-CoA:lyso-platelet-activating factor…	LPCAT1 AYTL2 PFAAP3		1.03218		0.0781194				0.932914		-0.171266			1
Q9H7Z7	Prostaglandin E synthase 2 (EC 5.3.99.3) (Membrane-associated prostaglandin E synthase-2) (mPGE synthase-2) (Microsomal prostaglandin E synthase 2) (mPGES-2) (Prostaglandin-H(2) E-isomerase) [Cleaved into: Prostaglandin E synthase 2 truncated form]	PTGES2 C9orf15 PGES2		2.05896		1.78117				1.15291		0.350919			1
O95159	Zinc finger protein-like 1 (Zinc finger protein MCG4)	ZFPL1		0.776042	0.758251	-0.653762	+	1.55556		0.92668	1.09467	0.0261906		0.0243566	1
Q93052	Lipoma-preferred partner (LIM domain-containing preferred translocation partner in lipoma)	LPP		0.730343		-0.775012				0.893422		-0.277942			1
Q15436	Protein transport protein Sec23A (hSec23A) (SEC23-related protein A)	SEC23A			0.935417	-0.164658					1.00281	0.00692468			1
P50897	Palmitoyl-protein thioesterase 1 (PPT-1) (EC 3.1.2.22) (Palmitoyl-protein hydrolase 1)	PPT1 CLN1 PPT			0.933341	-0.170136					0.950918	-0.124122			1
P08754	Guanine nucleotide-binding protein G(i) subunit alpha-3 (G(i) alpha-3)	GNAI3			1.04149	0.100263					1.01444	0.0353596			1
Q9NP58	ATP-binding cassette sub-family B member 6 (ABC-type heme transporter ABCB6) (EC 7.6.2.5) (Mitochondrial ABC transporter 3) (Mt-ABC transporter 3) (P-glycoprotein-related protein) (Ubiquitously-expressed mammalian ABC half transporter)	ABCB6 MTABC3 PRP UMAT			0.758724	-0.680988					1.00293	0.00720728			1
Q6ZRP7	Sulfhydryl oxidase 2 (EC 1.8.3.2) (Neuroblastoma-derived sulfhydryl oxidase) (Quiescin Q6-like protein 1)	QSOX2 QSCN6L1 SOXN			0.987075	-0.0320845					1.02222	0.0541974			1
Q92520	Protein FAM3C (Interleukin-like EMT inducer)	FAM3C ILEI GS3786			0.84519	-0.414817					1.07245	0.172499			1
Q96KG9	N-terminal kinase-like protein (Coated vesicle-associated kinase of 90 kDa) (SCY1-like protein 1) (Telomerase regulation-associated protein) (Telomerase transcriptional element-interacting factor) (Teratoma-associated tyrosine kinase)	SCYL1 CVAK90 GKLP NTKL TAPK TEIF TRAP HT019			0.975147	-0.0620695					0.88709	-0.295485			1
Q14919	Dr1-associated corepressor (Dr1-associated protein 1) (Negative cofactor 2-alpha) (NC2-alpha)	DRAP1			1.1198	0.279059					1.1438	0.331353			1
Q53H82	Endoribonuclease LACTB2 (EC 3.1.27.-) (Beta-lactamase-like protein 2)	LACTB2 CGI-83			0.775247	-0.627856					0.941492	-0.148692			1
Q969E2	Secretory carrier-associated membrane protein 4 (Secretory carrier membrane protein 4)	SCAMP4			0.928429	-0.18315					1.02524	0.0614833			1
Q8N4C8	Misshapen-like kinase 1 (EC 2.7.11.1) (GCK family kinase MiNK) (MAPK/ERK kinase kinase kinase 6) (MEK kinase kinase 6) (MEKKK 6) (Misshapen/NIK-related kinase) (Mitogen-activated protein kinase kinase kinase kinase 6)	MINK1 B55 MAP4K6 MINK YSK2 ZC3			1.35378	0.747039					1.1091	0.255379			1
Q9Y5S2	Serine/threonine-protein kinase MRCK beta (EC 2.7.11.1) (CDC42-binding protein kinase beta) (CDC42BP-beta) (DMPK-like beta) (Myotonic dystrophy kinase-related CDC42-binding kinase beta) (MRCK beta) (Myotonic dystrophy protein kinase-like beta)	CDC42BPB KIAA1124			2.26857	2.02028					0.858093	-0.377451			1
Q96A49	Synapse-associated protein 1 (BSD domain-containing signal transducer and Akt interactor protein) (BSTA)	SYAP1 PRO3113			1.20675	0.463499					0.850604	-0.399069			1
Q13057	Bifunctional coenzyme A synthase (CoA synthase) (NBP) (POV-2) [Includes: Phosphopantetheine adenylyltransferase (EC 2.7.7.3) (Dephospho-CoA pyrophosphorylase) (Pantetheine-phosphate adenylyltransferase) (PPAT); Dephospho-CoA kinase (DPCK) (EC 2.7.1.24) (Dephosphocoenzyme A kinase) (DPCOAK)]	COASY PSEC0106			0.902374	-0.253354					0.913166	-0.224033			1
Q99700	Ataxin-2 (Spinocerebellar ataxia type 2 protein) (Trinucleotide repeat-containing gene 13 protein)	ATXN2 ATX2 SCA2 TNRC13			1.00428	0.0105344					0.733053	-0.765879			1
P01111	GTPase NRas (EC 3.6.5.2) (Transforming protein N-Ras)	NRAS HRAS1			0.726502	-0.788018					1.00328	0.00808161			1
Q12929	Epidermal growth factor receptor kinase substrate 8	EPS8			0.793335	-0.570972					0.903102	-0.251364			1
O75844	CAAX prenyl protease 1 homolog (EC 3.4.24.84) (Farnesylated proteins-converting enzyme 1) (FACE-1) (Prenyl protein-specific endoprotease 1) (Zinc metalloproteinase Ste24 homolog)	ZMPSTE24 FACE1 STE24			0.905657	-0.244397					0.929641	-0.179933			1
Q96AC1	Fermitin family homolog 2 (Kindlin-2) (Mitogen-inducible gene 2 protein) (MIG-2) (Pleckstrin homology domain-containing family C member 1) (PH domain-containing family C member 1)	FERMT2 KIND2 MIG2 PLEKHC1			0.753957	-0.696532					0.923742	-0.195633			1
Q9Y6E0	Serine/threonine-protein kinase 24 (EC 2.7.11.1) (Mammalian STE20-like protein kinase 3) (MST-3) (STE20-like kinase MST3) [Cleaved into: Serine/threonine-protein kinase 24 36 kDa subunit (Mammalian STE20-like protein kinase 3 N-terminal) (MST3/N); Serine/threonine-protein kinase 24 12 kDa subunit (Mammalian STE20-like protein kinase 3 C-terminal) (MST3/C)]	STK24 MST3 STK3			1.00599	0.0147196					1.02021	0.0493566			1
Q9UKS6	Protein kinase C and casein kinase substrate in neurons protein 3 (SH3 domain-containing protein 6511)	PACSIN3			0.766916	-0.654503					1.28329	0.615172			1
Q86SQ0	Pleckstrin homology-like domain family B member 2 (Protein LL5-beta)	PHLDB2 LL5B			1.78266	1.42578					1.3727	0.78127			1
Q9HD45	Transmembrane 9 superfamily member 3 (EP70-P-iso) (SM-11044-binding protein)	TM9SF3 SMBP UNQ245/PRO282			0.823679	-0.4784					0.959566	-0.101793			1
Q14204	Cytoplasmic dynein 1 heavy chain 1 (Cytoplasmic dynein heavy chain 1) (Dynein heavy chain, cytosolic)	DYNC1H1 DHC1 DNCH1 DNCL DNECL DYHC KIAA0325	0.837513	0.809751	0.871138	-0.431572	+	1.84833	0.981631	1.01953	0.931789	-0.0557432		0.3313		1
O43707	Alpha-actinin-4 (Non-muscle alpha-actinin 4)	ACTN4	0.892832	0.913975	0.929123	-0.227247	+	1.81433	1.03328	1.01317	1.00029	0.0381342		0.611029		1
P35579	Myosin-9 (Cellular myosin heavy chain, type A) (Myosin heavy chain 9) (Myosin heavy chain, non-muscle IIa) (Non-muscle myosin heavy chain A) (NMMHC-A) (Non-muscle myosin heavy chain IIa) (NMMHC II-a) (NMMHC-IIA)	MYH9	0.99807	0.931071	0.956627	-0.0957455		0.716909	1.06796	1.02752	1.02272	0.0953097		0.969977		1
Q13813	Spectrin alpha chain, non-erythrocytic 1 (Alpha-II spectrin) (Fodrin alpha chain) (Spectrin, non-erythroid alpha subunit)	SPTAN1 NEAS SPTA2	0.996052	0.904991	0.944218	-0.13061		0.715916	0.997764	1.02495	1.08119	0.0839752		0.535107		1
P42704	Leucine-rich PPR motif-containing protein, mitochondrial (130 kDa leucine-rich protein) (LRP 130) (GP130)	LRPPRC LRP130	0.953822	0.962293	0.918204	-0.140113		1.23526	1.00072	1.04446	1.01068	0.0454933		0.5331		1
P10809	60 kDa heat shock protein, mitochondrial (EC 5.6.1.7) (60 kDa chaperonin) (Chaperonin 60) (CPN60) (Heat shock protein 60) (HSP-60) (Hsp60) (HuCHA60) (Mitochondrial matrix protein P1) (P60 lymphocyte protein)	HSPD1 HSP60	1.01806	1.03823	0.992919	0.0401253		0.470253	1.00955	1.0069	0.93473	-0.0404666		0.244728		1
P11021	Endoplasmic reticulum chaperone BiP (EC 3.6.4.10) (78 kDa glucose-regulated protein) (GRP-78) (Binding-immunoglobulin protein) (BiP) (Heat shock protein 70 family protein 5) (HSP70 family protein 5) (Heat shock protein family A member 5) (Immunoglobulin heavy chain-binding protein)	HSPA5 GRP78	1.41195	1.3563	1.36918	0.792823	+	2.84642	1.26043	1.15843	1.18231	0.450455	+	1.72224		1
P12814	Alpha-actinin-1 (Alpha-actinin cytoskeletal isoform) (F-actin cross-linking protein) (Non-muscle alpha-actinin-1)	ACTN1	0.826487	0.905493	0.924268	-0.300144		1.15423	1.08593	1.00379	0.948532	0.0312502		0.0951159		1
P13639	Elongation factor 2 (EF-2)	EEF2 EF2	1.0537	1.02368	1.14962	0.179902		0.754468	1.02493	1.09469	0.986702	0.0858934		0.420189		1
P11142	Heat shock cognate 71 kDa protein (EC 3.6.4.10) (Heat shock 70 kDa protein 8) (Lipopolysaccharide-associated protein 1) (LAP-1) (LPS-associated protein 1)	HSPA8 HSC70 HSP73 HSPA10	1.06874	1.06335	1.05065	0.145826	+	2.13938	1.01852	1.11331	1.12182	0.20018		0.911642		1
P46940	Ras GTPase-activating-like protein IQGAP1 (p195)	IQGAP1 KIAA0051	0.878157	0.87879	0.939456	-0.263138	+	1.38824	1.01053	0.95347	0.885803	-0.126672		0.522605		1
Q9NZM1	Myoferlin (Fer-1-like protein 3)	MYOF FER1L3 KIAA1207	0.949778	0.883056	0.9048	-0.225712		1.2998	1.0872	1.05781	1.01881	0.131129		0.970277		1
P11413	Glucose-6-phosphate 1-dehydrogenase (G6PD) (EC 1.1.1.49)	G6PD	0.6671	0.668927	0.764691	-0.878826	+	1.81125	1.00698	0.966036	0.902391	-0.104612		0.512582		1
P07814	Bifunctional glutamate/proline--tRNA ligase (Bifunctional aminoacyl-tRNA synthetase) (Cell proliferation-inducing gene 32 protein) (Glutamatyl-prolyl-tRNA synthetase) [Includes: Glutamate--tRNA ligase (EC 6.1.1.17) (Glutamyl-tRNA synthetase) (GluRS); Proline--tRNA ligase (EC 6.1.1.15) (Prolyl-tRNA synthetase)]	EPRS1 EPRS GLNS PARS QARS QPRS PIG32	0.906045	0.919512	0.991804	-0.154913		0.820501	0.995894	0.950498	0.888744	-0.139401		0.651071		1
P14618	Pyruvate kinase PKM (EC 2.7.1.40) (Cytosolic thyroid hormone-binding protein) (CTHBP) (Opa-interacting protein 3) (OIP-3) (Pyruvate kinase 2/3) (Pyruvate kinase muscle isozyme) (Threonine-protein kinase PKM2) (EC 2.7.11.1) (Thyroid hormone-binding protein 1) (THBP1) (Tumor M2-PK) (Tyrosine-protein kinase PKM2) (EC 2.7.10.2) (p58)	PKM OIP3 PK2 PK3 PKM2	0.927916	0.894783	1.01705	-0.135392		0.557143	1.03897	1.08376	0.976478	0.0802351		0.391597		1
P38646	Stress-70 protein, mitochondrial (75 kDa glucose-regulated protein) (GRP-75) (Heat shock 70 kDa protein 9) (Mortalin) (MOT) (Peptide-binding protein 74) (PBP74)	HSPA9 GRP75 HSPA9B mt-HSP70	1.00113	1.02418	1.00009	0.0208005		0.404852	1.02786	0.986081	1.04384	0.0470431		0.415474		1
P31939	Bifunctional purine biosynthesis protein ATIC (AICAR transformylase/inosine monophosphate cyclohydrolase) (ATIC) [Cleaved into: Bifunctional purine biosynthesis protein ATIC, N-terminally processed] [Includes: Phosphoribosylaminoimidazolecarboxamide formyltransferase (EC 2.1.2.3) (5-aminoimidazole-4-carboxamide ribonucleotide formyltransferase) (AICAR formyltransferase) (AICAR transformylase); In…	ATIC PURH OK/SW-cl.86	0.913197	0.944169	1.06102	-0.0680241		0.235751	0.970661	1.01105	0.929709	-0.0739172		0.47596		1
P07900	Heat shock protein HSP 90-alpha (EC 3.6.4.10) (Heat shock 86 kDa) (HSP 86) (HSP86) (Lipopolysaccharide-associated protein 2) (LAP-2) (LPS-associated protein 2) (Renal carcinoma antigen NY-REN-38)	HSP90AA1 HSP90A HSPC1 HSPCA	0.708864	0.805596	0.710252	-0.737386	+	1.71619	0.948827	1.00675	0.90308	-0.119027		0.589298		1
Q9Y490	Talin-1	TLN1 KIAA1027 TLN	1.06692	0.993872	1.17881	0.189511		0.565789	0.955883	1.0043	1.0115	-0.0233895		0.195895		1
P63261	Actin, cytoplasmic 2 (EC 3.6.4.-) (Gamma-actin) [Cleaved into: Actin, cytoplasmic 2, N-terminally processed]	ACTG1 ACTG	0.96685	0.972645	0.956119	-0.0873446	+	1.71011	1.00861	1.03229	1.02516	0.0537227		1.0592		1
P04406	Glyceraldehyde-3-phosphate dehydrogenase (GAPDH) (EC 1.2.1.12) (Peptidyl-cysteine S-nitrosylase GAPDH) (EC 2.6.99.-)	GAPDH GAPD CDABP0047 OK/SW-cl.12	0.745489	0.728507	0.765034	-0.721566	+	2.63422	1.01092	1.04549	1.04445	0.0815536		1.01596		1
P00558	Phosphoglycerate kinase 1 (EC 2.7.2.3) (Cell migration-inducing gene 10 protein) (Primer recognition protein 2) (PRP 2)	PGK1 PGKA MIG10 OK/SW-cl.110	0.976968	1.0023	1.0273	0.00539371		0.0438012	1.28209	1.27168	1.17239	0.534608	+	1.76866		1
P58107	Epiplakin (450 kDa epidermal antigen)	EPPK1 EPIPL	0.804992	0.830311	0.807528	-0.506714	+	2.6413	1.01551	0.964623	0.929254	-0.0756414		0.459049		1
Q92598	Heat shock protein 105 kDa (Antigen NY-CO-25) (Heat shock 110 kDa protein)	HSPH1 HSP105 HSP110 KIAA0201	1.21087	1.1157	1.14653	0.361151	+	1.5824	0.952361	1.05142	0.944994	-0.0424719		0.19005		1
P07437	Tubulin beta chain (Tubulin beta-5 chain)	TUBB TUBB5 OK/SW-cl.56	1.0706	1.02077	1.10953	0.159869		0.931644	0.949988	1.03659	0.973341	-0.0331746		0.192993		1
P40227	T-complex protein 1 subunit zeta (TCP-1-zeta) (Acute morphine dependence-related protein 2) (CCT-zeta-1) (HTR3) (Tcp20)	CCT6A CCT6 CCTZ	1.32528	1.14406	1.12663	0.446897		1.12611	1.01069	1.08413	1.04498	0.112328		0.807702		1
P68371	Tubulin beta-4B chain (Tubulin beta-2 chain) (Tubulin beta-2C chain)	TUBB4B TUBB2C	1.06603	0.984806	1.07672	0.102693		0.545454	0.995984	1.04959	0.979855	0.020814		0.132761		1
P43490	Nicotinamide phosphoribosyltransferase (NAmPRTase) (Nampt) (EC 2.4.2.12) (Pre-B-cell colony-enhancing factor 1) (Pre-B cell-enhancing factor) (Visfatin)	NAMPT PBEF PBEF1	0.976036	0.951879	1.04829	-0.0196359		0.102662	1.00974	1.20415	0.939801	0.123222		0.216577		1
P49368	T-complex protein 1 subunit gamma (TCP-1-gamma) (CCT-gamma) (hTRiC5)	CCT3 CCTG TRIC5	0.947448	0.916023	0.962351	-0.147518		1.26677	1.06396	1.0904	1.0623	0.171973	+	1.84131		1
Q15149	Plectin (PCN) (PLTN) (Hemidesmosomal protein 1) (HD1) (Plectin-1)	PLEC PLEC1	0.71955	0.776212	0.686764	-0.784604	+	1.91196	0.975465	0.992275	1.02195	-0.00849194		0.0890758		1
P50990	T-complex protein 1 subunit theta (TCP-1-theta) (CCT-theta) (Chaperonin containing T-complex polypeptide 1 subunit 8) (Renal carcinoma antigen NY-REN-15)	CCT8 C21orf112 CCTQ KIAA0002	0.987546	1.01126	0.927181	-0.0616082		0.370113	0.904792	0.97608	0.929195	-0.161305		1.01174		1
P14625	Endoplasmin (94 kDa glucose-regulated protein) (GRP-94) (Heat shock protein 90 kDa beta member 1) (Tumor rejection antigen 1) (gp96 homolog)	HSP90B1 GRP94 TRA1	0.659787	0.774927	0.744065	-0.78884	+	1.66274	1.21259	0.968771	0.971127	0.122279		0.211142		1
O60701	UDP-glucose 6-dehydrogenase (UDP-Glc dehydrogenase) (UDP-GlcDH) (UDPGDH) (EC 1.1.1.22)	UGDH	0.620209	0.664863	0.653336	-1.07715	+	2.64336	0.991119	1.07731	0.897303	-0.0283332		0.0902141		1
P40926	Malate dehydrogenase, mitochondrial (EC 1.1.1.37)	MDH2	1.09547	1.1212	1.04553	0.206656		1.25409	0.999577	0.958287	1.01601	-0.0215763		0.183594		1
Q9P2E9	Ribosome-binding protein 1 (180 kDa ribosome receptor homolog) (RRp) (ES/130-related protein) (Ribosome receptor protein)	RRBP1 KIAA1398	1.07431	1.08747	0.951495	0.0914021		0.305269	0.947965	0.979658	1.06969	-0.00221198		0.0192016		1
P06733	Alpha-enolase (EC 4.2.1.11) (2-phospho-D-glycerate hydro-lyase) (C-myc promoter-binding protein) (Enolase 1) (MBP-1) (MPB-1) (Non-neural enolase) (NNE) (Phosphopyruvate hydratase) (Plasminogen-binding protein)	ENO1 ENO1L1 MBPB1 MPB1	0.782956	0.817229	0.929178	-0.420862		1.10828	0.987385	1.05485	0.987117	0.0240119		0.145047		1
P60174	Triosephosphate isomerase (TIM) (EC 5.3.1.1) (Methylglyoxal synthase) (EC 4.2.3.3) (Triose-phosphate isomerase)	TPI1 TPI	0.807172	0.833359	0.804139	-0.504858	+	2.5169	1.16423	1.07691	1.05143	0.229507		1.01858		1
P12956	X-ray repair cross-complementing protein 6 (EC 3.6.4.-) (EC 4.2.99.-) (5'-deoxyribose-5-phosphate lyase Ku70) (5'-dRP lyase Ku70) (70 kDa subunit of Ku antigen) (ATP-dependent DNA helicase 2 subunit 1) (ATP-dependent DNA helicase II 70 kDa subunit) (CTC box-binding factor 75 kDa subunit) (CTC75) (CTCBF) (DNA repair protein XRCC6) (Lupus Ku autoantigen protein p70) (Ku70) (Thyroid-lupus autoantige…	XRCC6 G22P1	1.01471	1.01816	0.992388	0.0206773		0.387736	1.07337	1.0241	1.08552	0.146025		1.09278		1
P78371	T-complex protein 1 subunit beta (TCP-1-beta) (CCT-beta)	CCT2 99D8.1 CCTB	0.863779	0.806912	0.823757	-0.455143	+	1.93282	0.969183	1.03878	0.977019	-0.0123745		0.0834747		1
P08238	Heat shock protein HSP 90-beta (HSP 90) (Heat shock 84 kDa) (HSP 84) (HSP84)	HSP90AB1 HSP90B HSPC2 HSPCB	1.19666	1.225	1.01796	0.337263		0.827002	0.93674	1.13116	0.865031	-0.0557639		0.124896		1
Q9BQE3	Tubulin alpha-1C chain (EC 3.6.5.-) (Alpha-tubulin 6) (Tubulin alpha-6 chain) [Cleaved into: Detyrosinated tubulin alpha-1C chain]	TUBA1C TUBA6	1.0941	1.04227	1.07335	0.16665	+	1.3853	0.958172	0.963549	0.93714	-0.118848	+	1.52936		1
P0DMV8	Heat shock 70 kDa protein 1A (Heat shock 70 kDa protein 1) (HSP70-1) (HSP70.1)	HSPA1A HSP72 HSPA1 HSX70	0.894205	0.93843	0.905555	-0.225211	+	1.61893	1.23761	1.06747	1.0464	0.273239		0.748929		1
P02545	Prelamin-A/C [Cleaved into: Lamin-A/C (70 kDa lamin) (Renal carcinoma antigen NY-REN-32)]	LMNA LMN1	0.869076	0.85729	0.835121	-0.389736	+	2.26587	1.15924	1.09884	1.08749	0.268886	+	1.49967		1
P14866	Heterogeneous nuclear ribonucleoprotein L (hnRNP L)	HNRNPL HNRPL P/OKcl.14	0.869777	0.953254	0.935186	-0.207238		1.02965	1.04656	1.05915	1.04923	0.1242	+	2.28627		1
P50991	T-complex protein 1 subunit delta (TCP-1-delta) (CCT-delta) (Stimulator of TAR RNA-binding)	CCT4 CCTD SRB	0.885705	0.885862	0.855781	-0.327124	+	2.13069	0.994193	1.06549	0.991484	0.0417078		0.252338		1
P55060	Exportin-2 (Exp2) (Cellular apoptosis susceptibility protein) (Chromosome segregation 1-like protein) (Importin-alpha re-exporter)	CSE1L CAS XPO2	1.16312	1.15881	1.19662	0.393216	+	2.39522	0.999681	1.09182	1.03473	0.101653		0.594024		1
Q5VTE0	Putative elongation factor 1-alpha-like 3 (EF-1-alpha-like 3) (Eukaryotic elongation factor 1 A-like 3) (eEF1A-like 3) (Eukaryotic translation elongation factor 1 alpha-1 pseudogene 5)	EEF1A1P5 EEF1AL3	1.15834			0.362523			0.888213			-0.292365				1
P05783	Keratin, type I cytoskeletal 18 (Cell proliferation-inducing gene 46 protein) (Cytokeratin-18) (CK-18) (Keratin-18) (K18)	KRT18 CYK18 PIG46	0.470309	0.494829	0.4351	-1.87925	+	2.62116	0.90665	1.02687	1.19958	0.107061		0.158721		1
P04083	Annexin A1 (Annexin I) (Annexin-1) (Calpactin II) (Calpactin-2) (Chromobindin-9) (Lipocortin I) (Phospholipase A2 inhibitory protein) (p35) [Cleaved into: Annexin Ac2-26]	ANXA1 ANX1 LPC1	1.66272	1.42446	1.62995	1.11622	+	1.94157	1.10156	1.1251	1.00536	0.183728		0.775486		1
Q12906	Interleukin enhancer-binding factor 3 (Double-stranded RNA-binding protein 76) (DRBP76) (M-phase phosphoprotein 4) (MPP4) (Nuclear factor associated with dsRNA) (NFAR) (Nuclear factor of activated T-cells 90 kDa) (NF-AT-90) (Translational control protein 80) (TCP80)	ILF3 DRBF MPHOSPH4 NF90	0.938827	0.950843	0.888576	-0.189394		1.18435	0.934627	0.991704	1.0548	-0.0155577		0.0709309		1
P22102	Trifunctional purine biosynthetic protein adenosine-3 [Includes: Phosphoribosylamine--glycine ligase (EC 6.3.4.13) (Glycinamide ribonucleotide synthetase) (GARS) (Phosphoribosylglycinamide synthetase); Phosphoribosylformylglycinamidine cyclo-ligase (EC 6.3.3.1) (AIR synthase) (AIRS) (Phosphoribosyl-aminoimidazole synthetase); Phosphoribosylglycinamide formyltransferase (EC 2.1.2.2) (5'-phosphorib…	GART PGFT PRGS	1.04771	0.957721	1.06572	0.0578057		0.244458	0.974684	1.04706	0.932914	-0.0375639		0.170899		1
P68366	Tubulin alpha-4A chain (EC 3.6.5.-) (Alpha-tubulin 1) (Testis-specific alpha-tubulin) (Tubulin H2-alpha) (Tubulin alpha-1 chain)	TUBA4A TUBA1	1.08373	1.04803	1.0987	0.182537	+	1.46526	0.951709	0.958344	0.940859	-0.125717	+	1.9626		1
P55072	Transitional endoplasmic reticulum ATPase (TER ATPase) (EC 3.6.4.6) (15S Mg(2+)-ATPase p97 subunit) (Valosin-containing protein) (VCP)	VCP	1.06695	1.17371	1.08627	0.255109		1.13894	1.01852	0.975023	0.991307	-0.0124867		0.142021		1
P11940	Polyadenylate-binding protein 1 (PABP-1) (Poly(A)-binding protein 1)	PABPC1 PAB1 PABP PABP1 PABPC2	1.10669	1.00493	1.07515	0.148947		0.763349	0.934401	1.2205	1.03934	0.15473		0.266512		1
O60218	Aldo-keto reductase family 1 member B10 (EC 1.1.1.300) (EC 1.1.1.54) (ARL-1) (Aldose reductase-like) (Aldose reductase-related protein) (ARP) (hARP) (Small intestine reductase) (SI reductase)	AKR1B10 AKR1B11	1.10355	1.10377	1.16045	0.285204	+	1.69072	1.00044	1.06202	1.06309	0.101112		0.743282		1
O43175	D-3-phosphoglycerate dehydrogenase (3-PGDH) (EC 1.1.1.95) (2-oxoglutarate reductase) (EC 1.1.1.399) (Malate dehydrogenase) (EC 1.1.1.37)	PHGDH PGDH3	0.745787	0.770082	0.819107	-0.618082	+	1.92912	0.984066	0.902994	0.912253	-0.170763		0.90988		1
Q13200	26S proteasome non-ATPase regulatory subunit 2 (26S proteasome regulatory subunit RPN1) (26S proteasome regulatory subunit S2) (26S proteasome subunit p97) (Protein 55.11) (Tumor necrosis factor type 1 receptor-associated protein 2)	PSMD2 TRAP2	1.06716	1.05435	1.01076	0.106406		0.916512	1.09332	1.17285	0.961941	0.180738		0.454295		1
P09874	Poly [ADP-ribose] polymerase 1 (PARP-1) (EC 2.4.2.30) (ADP-ribosyltransferase diphtheria toxin-like 1) (ARTD1) (DNA ADP-ribosyltransferase PARP1) (EC 2.4.2.-) (NAD(+) ADP-ribosyltransferase 1) (ADPRT 1) (Poly[ADP-ribose] synthase 1) (Protein poly-ADP-ribosyltransferase PARP1) (EC 2.4.2.-) [Cleaved into: Poly [ADP-ribose] polymerase 1, processed C-terminus (Poly [ADP-ribose] polymerase 1, 89-kDa f…	PARP1 ADPRT PPOL	1.23368	1.16659	1.20931	0.456218	+	2.11045	0.912356	1.00312	0.91656	-0.142099		0.702818		1
P07384	Calpain-1 catalytic subunit (EC 3.4.22.52) (Calcium-activated neutral proteinase 1) (CANP 1) (Calpain mu-type) (Calpain-1 large subunit) (Cell proliferation-inducing gene 30 protein) (Micromolar-calpain) (muCANP)	CAPN1 CANPL1 PIG30	0.951971	0.863543	0.936588	-0.212712		0.992455	0.994706	1.02268	0.722292	-0.223867		0.342557		1
P45880	Voltage-dependent anion-selective channel protein 2 (VDAC-2) (hVDAC2) (Outer mitochondrial membrane protein porin 2)	VDAC2	0.965509	1.08423	0.980377	0.0246319		0.0787328	1.11553	1.18206	1.12591	0.325678	+	1.74235		1
P15121	Aldo-keto reductase family 1 member B1 (EC 1.1.1.300) (EC 1.1.1.372) (EC 1.1.1.54) (Aldehyde reductase) (Aldose reductase) (AR) (EC 1.1.1.21)	AKR1B1 ALDR1 ALR2	2.5109	2.31592	2.4611	2.18911	+	3.12501	1.13459	0.969008	1.0292	0.106822		0.332802		1
P36578	60S ribosomal protein L4 (60S ribosomal protein L1) (Large ribosomal subunit protein uL4)	RPL4 RPL1	0.970893	0.857494	0.934435	-0.203124		0.823074	1.13256	1.24769	1.08117	0.35284		1.10338		1
P49790	Nuclear pore complex protein Nup153 (153 kDa nucleoporin) (Nucleoporin Nup153)	NUP153	0.980234	1.02981	0.955967	-0.028106		0.19291	0.99806	1.02017	0.867449	-0.095819		0.300337		1
P30153	Serine/threonine-protein phosphatase 2A 65 kDa regulatory subunit A alpha isoform (Medium tumor antigen-associated 61 kDa protein) (PP2A subunit A isoform PR65-alpha) (PP2A subunit A isoform R1-alpha)	PPP2R1A	0.932258	0.8834	0.936927	-0.21228	+	1.35316	0.99644	1.10557	0.943893	0.0374505		0.0940055		1
P04075	Fructose-bisphosphate aldolase A (EC 4.1.2.13) (Lung cancer antigen NY-LU-1) (Muscle-type aldolase)	ALDOA ALDA	0.731146	0.885589	0.876634	-0.456211		1.02815	1.20086	1.12582	1.20359	0.401423	+	1.75143		1
P19338	Nucleolin (Protein C23)	NCL	0.773054	1.0372	0.848708	-0.297629		0.557417	0.879208	0.996414	0.936838	-0.159207		0.678024		1
Q9Y265	RuvB-like 1 (EC 3.6.4.12) (49 kDa TATA box-binding protein-interacting protein) (49 kDa TBP-interacting protein) (54 kDa erythrocyte cytosolic protein) (ECP-54) (INO80 complex subunit H) (Nuclear matrix protein 238) (NMP 238) (Pontin 52) (TIP49a) (TIP60-associated protein 54-alpha) (TAP54-alpha)	RUVBL1 INO80H NMP238 TIP49 TIP49A	1.13154	1.12483	1.14403	0.308977	+	2.80624	0.936983	0.959461	0.987503	-0.0973019		0.919009		1
P15924	Desmoplakin (DP) (250/210 kDa paraneoplastic pemphigus antigen)	DSP	0.860655	0.954593	0.82844	-0.311834		1.02726	1.08563	1.03242	1.08388	0.16066		1.22942		1
P18669	Phosphoglycerate mutase 1 (EC 5.4.2.11) (EC 5.4.2.4) (BPG-dependent PGAM 1) (Phosphoglycerate mutase isozyme B) (PGAM-B)	PGAM1 PGAMA CDABP0006	0.896078	0.938851	0.961604	-0.173213		1.11755	1.19642	1.34782	1.2708	0.592749	+	1.6975		1
P04843	Dolichyl-diphosphooligosaccharide--protein glycosyltransferase subunit 1 (Dolichyl-diphosphooligosaccharide--protein glycosyltransferase 67 kDa subunit) (Ribophorin I) (RPN-I) (Ribophorin-1)	RPN1	1.03169	1.05998	0.959255	0.0415113		0.18963	1.06528	1.0351	1.08201	0.14556	+	1.3432		1
P49792	E3 SUMO-protein ligase RanBP2 (EC 2.3.2.-) (358 kDa nucleoporin) (Nuclear pore complex protein Nup358) (Nucleoporin Nup358) (Ran-binding protein 2) (RanBP2) (p270)	RANBP2 NUP358	1.03691	1.01732	1.05228	0.0860447		1.15048	1.00156	0.93045	1.03672	-0.0258418		0.123107		1
P68133	Actin, alpha skeletal muscle (EC 3.6.4.-) (Alpha-actin-1) [Cleaved into: Actin, alpha skeletal muscle, intermediate form]	ACTA1 ACTA	0.936739			-0.161176			1.08104			0.192172				1
P23528	Cofilin-1 (18 kDa phosphoprotein) (p18) (Cofilin, non-muscle isoform)	CFL1 CFL	0.981276	0.973468	1.08269	0.0305872		0.111271	0.949963	0.899472	1.10423	-0.0383875		0.106819		1
P29401	Transketolase (TK) (EC 2.2.1.1)	TKT	0.875454	0.824552	0.920035	-0.333992	+	1.3018	0.976529	0.989869	1.0295	-0.00337095		0.0324853		1
P48643	T-complex protein 1 subunit epsilon (TCP-1-epsilon) (CCT-epsilon)	CCT5 CCTE KIAA0098	0.991005	0.842289	0.860197	-0.265804		0.787689	0.879927	1.0056	0.972346	-0.119703		0.471578		1
P26639	Threonine--tRNA ligase 1, cytoplasmic (EC 6.1.1.3) (Threonyl-tRNA synthetase) (ThrRS) (Threonyl-tRNA synthetase 1)	TARS1 TARS	0.973826	0.955559	0.92747	-0.12058		1.12839	0.940636	0.978497	0.908151	-0.146241		0.961974		1
P60842	Eukaryotic initiation factor 4A-I (eIF-4A-I) (eIF4A-I) (EC 3.6.4.13) (ATP-dependent RNA helicase eIF4A-1)	EIF4A1 DDX2A EIF4A	1.14051	1.06399	1.10809	0.244453	+	1.40656	0.977944	1.09086	1.09551	0.131513		0.527492		1
P34932	Heat shock 70 kDa protein 4 (HSP70RY) (Heat shock 70-related protein APG-2)	HSPA4 APG2	1.18081	1.24345	1.1493	0.431477	+	1.76725	0.983422	0.902251	0.930251	-0.156172		0.89765		1
Q05639	Elongation factor 1-alpha 2 (EF-1-alpha-2) (Eukaryotic elongation factor 1 A-2) (eEF1A-2) (Statin-S1)	EEF1A2 EEF1AL STN	1.0203	0.945528	1.01753	-0.0137168		0.0822859	1.05084	1.10117	0.885204	0.0304067		0.0385935		1
P07195	L-lactate dehydrogenase B chain (LDH-B) (EC 1.1.1.27) (LDH heart subunit) (LDH-H) (Renal carcinoma antigen NY-REN-46)	LDHB	0.705648	0.721284	0.77149	-0.766705	+	2.13445	1.05267	0.886702	1.01865	-0.0347593		0.108223		1
P26599	Polypyrimidine tract-binding protein 1 (PTB) (57 kDa RNA-binding protein PPTB-1) (Heterogeneous nuclear ribonucleoprotein I) (hnRNP I)	PTBP1 PTB	0.918397	1.1337	0.937434	-0.00861799		0.0385408	0.938436	1.00681	1.02162	-0.0273858		0.156724		1
P52272	Heterogeneous nuclear ribonucleoprotein M (hnRNP M)	HNRNPM HNRPM NAGR1	0.897773	0.919165	0.877199	-0.265211	+	1.81458	1.08856	1.04163	0.989155	0.0962148		0.521349		1
P00352	Aldehyde dehydrogenase 1A1 (EC 1.2.1.19) (EC 1.2.1.28) (EC 1.2.1.3) (EC 1.2.1.36) (3-deoxyglucosone dehydrogenase) (ALDH-E1) (ALHDII) (Aldehyde dehydrogenase family 1 member A1) (Aldehyde dehydrogenase, cytosolic) (Retinal dehydrogenase 1) (RALDH 1) (RalDH1)	ALDH1A1 ALDC ALDH1 PUMB1	1.49434	1.26009	1.62448	0.932723	+	1.42083	0.874887	0.92148	0.780524	-0.374948		1.05664		1
Q14980	Nuclear mitotic apparatus protein 1 (Nuclear matrix protein-22) (NMP-22) (Nuclear mitotic apparatus protein) (NuMA protein) (SP-H antigen)	NUMA1 NMP22 NUMA	1.01089	1.00629	0.976805	-0.004955		0.0646668	1.08287	1.0013	1.03314	0.0945961		0.62286		1
Q7Z406	Myosin-14 (Myosin heavy chain 14) (Myosin heavy chain, non-muscle IIc) (Non-muscle myosin heavy chain IIc) (NMHC II-C)	MYH14 KIAA2034 FP17425	0.942452	0.955989	1.05545	-0.0382004		0.164925	0.984022	0.934439	0.952091	-0.108783		1.00345		1
Q06830	Peroxiredoxin-1 (EC 1.11.1.24) (Natural killer cell-enhancing factor A) (NKEF-A) (Proliferation-associated gene protein) (PAG) (Thioredoxin peroxidase 2) (Thioredoxin-dependent peroxide reductase 2) (Thioredoxin-dependent peroxiredoxin 1)	PRDX1 PAGA PAGB TDPX2	1.00839	0.985887	0.990236	-0.0127613		0.276855	1.09183	1.18643	1.04371	0.251432		0.936587		1
Q02790	Peptidyl-prolyl cis-trans isomerase FKBP4 (PPIase FKBP4) (EC 5.2.1.8) (51 kDa FK506-binding protein) (FKBP51) (52 kDa FK506-binding protein) (52 kDa FKBP) (FKBP-52) (59 kDa immunophilin) (p59) (FK506-binding protein 4) (FKBP-4) (FKBP59) (HSP-binding immunophilin) (HBI) (Immunophilin FKBP52) (Rotamase) [Cleaved into: Peptidyl-prolyl cis-trans isomerase FKBP4, N-terminally processed]	FKBP4 FKBP52	0.904753	1.07841	0.863161	-0.129686		0.312436	0.954534	1.02133	1.02554	0.00114761		0.000945541		1
Q99832	T-complex protein 1 subunit eta (TCP-1-eta) (CCT-eta) (HIV-1 Nef-interacting protein) [Cleaved into: T-complex protein 1 subunit eta, N-terminally processed]	CCT7 CCTH NIP7-1	0.912339	0.887953	0.843523	-0.311715	+	1.50446	1.04434	0.972774	1.06793	0.0689383		0.360399		1
P25705	ATP synthase subunit alpha, mitochondrial (ATP synthase F1 subunit alpha)	ATP5F1A ATP5A ATP5A1 ATP5AL2 ATPM	0.697995	0.889065	0.667342	-0.70469		1.09201	1.05222	1.00186	0.967183	0.0174139		0.0882181		1
P13797	Plastin-3 (T-plastin)	PLS3	0.533354	0.703142	0.765268	-0.997825		1.20557	0.965538	0.957059	0.951335	-0.105881	+	2.00475		1
P52209	6-phosphogluconate dehydrogenase, decarboxylating (EC 1.1.1.44)	PGD PGDH	1.0756	1.03697	1.09457	0.164671		1.277	1.06128	0.896391	1.01126	-0.0256711		0.0855208		1
P30101	Protein disulfide-isomerase A3 (EC 5.3.4.1) (58 kDa glucose-regulated protein) (58 kDa microsomal protein) (p58) (Disulfide isomerase ER-60) (Endoplasmic reticulum resident protein 57) (ER protein 57) (ERp57) (Endoplasmic reticulum resident protein 60) (ER protein 60) (ERp60)	PDIA3 ERP57 ERP60 GRP58	0.952469	1.17269	1.00077	0.101416		0.211847	1.21919	1.03832	1.05926	0.247562		0.715324		1
P49411	Elongation factor Tu, mitochondrial (EF-Tu) (P43)	TUFM	0.931467	0.924569	0.865234	-0.240498		1.27824	0.989753	1.05449	1.04659	0.0735626		0.554856		1
P15311	Ezrin (Cytovillin) (Villin-2) (p81)	EZR VIL2	1.02359	1.00746	1.06572	0.0782979		0.697296	0.985172	1.0092	0.974972	-0.0253297		0.380038		1
P00338	L-lactate dehydrogenase A chain (LDH-A) (EC 1.1.1.27) (Cell proliferation-inducing gene 19 protein) (LDH muscle subunit) (LDH-M) (Renal carcinoma antigen NY-REN-59)	LDHA PIG19	0.857515	0.82719	0.924859	-0.343874		1.29541	1.22277	1.54861	1.31474	0.762048	+	1.31012		1
P22626	Heterogeneous nuclear ribonucleoproteins A2/B1 (hnRNP A2/B1)	HNRNPA2B1 HNRPA2B1	0.840149	0.86406	0.886718	-0.361552	+	1.95594	1.0343	1.02985	1.06765	0.106039		1.19622		1
P06576	ATP synthase subunit beta, mitochondrial (EC 7.1.2.2) (ATP synthase F1 subunit beta)	ATP5F1B ATP5B ATPMB ATPSB	0.854523	0.859869	0.875872	-0.362183	+	2.59633	0.996287	1.01196	1.08056	0.0719506		0.431978		1
P06744	Glucose-6-phosphate isomerase (GPI) (EC 5.3.1.9) (Autocrine motility factor) (AMF) (Neuroleukin) (NLK) (Phosphoglucose isomerase) (PGI) (Phosphohexose isomerase) (PHI) (Sperm antigen 36) (SA-36)	GPI	0.886502	0.966849	0.893159	-0.217729		1.07087	1.19094	1.3251	1.18038	0.514846	+	1.51371		1
Q16658	Fascin (55 kDa actin-bundling protein) (Singed-like protein) (p55)	FSCN1 FAN1 HSN SNL	0.733647	0.885074	0.877235	-0.453653		1.03731	1.01823	1.18519	1.07478	0.218718		0.72053		1
P62258	14-3-3 protein epsilon (14-3-3E)	YWHAE	0.848101	1.12288	0.931371	-0.0816147		0.170197	1.02263	0.966854	1.00285	-0.00630647		0.0558628		1
Q9Y230	RuvB-like 2 (EC 3.6.4.12) (48 kDa TATA box-binding protein-interacting protein) (48 kDa TBP-interacting protein) (51 kDa erythrocyte cytosolic protein) (ECP-51) (INO80 complex subunit J) (Repressing pontin 52) (Reptin 52) (TIP49b) (TIP60-associated protein 54-beta) (TAP54-beta)	RUVBL2 INO80J TIP48 TIP49B CGI-46	1.04981	1.04998	1.11	0.166705		1.16482	0.938606	1.0902	1.02032	0.0400548		0.112607		1
O75694	Nuclear pore complex protein Nup155 (155 kDa nucleoporin) (Nucleoporin Nup155)	NUP155 KIAA0791	1.13675	1.12806	1.13585	0.309173	+	3.42338	0.958578	1.00159	0.93793	-0.0852294		0.673254		1
Q14974	Importin subunit beta-1 (Importin-90) (Karyopherin subunit beta-1) (Nuclear factor p97) (Pore targeting complex 97 kDa subunit) (PTAC97)	KPNB1 NTF97	1.07962	0.946857	1.00246	0.023674		0.0706025	0.989919	1.05025	1.08196	0.0984117		0.56521		1
Q96QK1	Vacuolar protein sorting-associated protein 35 (hVPS35) (Maternal-embryonic 3) (Vesicle protein sorting 35)	VPS35 MEM3 TCCCTA00141	0.848254	0.834211	0.802744	-0.464295	+	2.12977	0.957199	1.00298	0.877664	-0.137046		0.55015		1
P08865	40S ribosomal protein SA (37 kDa laminin receptor precursor) (37LRP) (37/67 kDa laminin receptor) (LRP/LR) (67 kDa laminin receptor) (67LR) (Colon carcinoma laminin-binding protein) (Laminin receptor 1) (LamR) (Laminin-binding protein precursor p40) (LBP/p40) (Multidrug resistance-associated protein MGr1-Ag) (NEM/1CHD4) (Small ribosomal subunit protein uS2)	RPSA LAMBR LAMR1	0.840049	0.764422	0.804229	-0.541415	+	1.82469	1.00494	1.06589	1.03885	0.0885582		0.764892		1
P55884	Eukaryotic translation initiation factor 3 subunit B (eIF3b) (Eukaryotic translation initiation factor 3 subunit 9) (Prt1 homolog) (hPrt1) (eIF-3-eta) (eIF3 p110) (eIF3 p116)	EIF3B EIF3S9	1.06256	0.976098	1.0494	0.0713581		0.400502	0.990527	1.01652	0.890802	-0.0854385		0.333387		1
P53396	ATP-citrate synthase (EC 2.3.3.8) (ATP-citrate (pro-S-)-lyase) (ACL) (Citrate cleavage enzyme)	ACLY	1.0333	0.977757	1.04749	0.0476672		0.333023	1.03047	1.04226	0.996841	0.0565479		0.636634		1
P05388	60S acidic ribosomal protein P0 (60S ribosomal protein L10E) (Large ribosomal subunit protein uL10)	RPLP0	0.925454	0.951412	1.04259	-0.0671224		0.291295	1.05182	1.18051	1.00905	0.190862		0.601141		1
P09211	Glutathione S-transferase P (EC 2.5.1.18) (GST class-pi) (GSTP1-1)	GSTP1 FAEES3 GST3	0.646895	0.712313	0.842837	-0.762644		1.25799	0.954518	0.961544	0.969207	-0.0961714	+	1.90182		1
P46060	Ran GTPase-activating protein 1 (RanGAP1)	RANGAP1 KIAA1835 SD	1.26019	1.12878	1.04335	0.332023		0.859685	0.964095	1.11865	1.06072	0.115208		0.386143		1
P34897	Serine hydroxymethyltransferase, mitochondrial (SHMT) (EC 2.1.2.1) (Glycine hydroxymethyltransferase) (Serine methylase)	SHMT2	0.836131	0.893051	0.68419	-0.536636		0.967537	1.019	0.990576	0.944621	-0.0379433		0.261682		1
P07954	Fumarate hydratase, mitochondrial (Fumarase) (HsFH) (EC 4.2.1.2)	FH	1.04259	1.05097	1.03798	0.105838	+	2.14706	0.989224	0.971655	0.911441	-0.107265		0.661589		1
Q15181	Inorganic pyrophosphatase (EC 3.6.1.1) (Pyrophosphate phospho-hydrolase) (PPase)	PPA1 IOPPP PP	1.15253	1.21376	1.29836	0.49356	+	1.54106	0.904446	0.961215	0.896812	-0.203435		1.20173		1
O75390	Citrate synthase, mitochondrial (EC 2.3.3.1) (Citrate (Si)-synthase)	CS	0.722131	0.740528	0.713373	-0.791952	+	2.93171	1.08351	1.00203	1.11348	0.158418		0.736745		1
O60716	Catenin delta-1 (Cadherin-associated Src substrate) (CAS) (p120 catenin) (p120(ctn)) (p120(cas))	CTNND1 KIAA0384	1.02448	0.981754	0.970216	-0.0194386		0.173596	0.957258	0.980406	0.956089	-0.0889304	+	1.32245		1
P27824	Calnexin (IP90) (Major histocompatibility complex class I antigen-binding protein p88) (p90)	CANX	0.980128	0.926233	1.04077	-0.0438542		0.200149	1.2604	1.13783	0.984583	0.296193		0.602668		1
P49588	Alanine--tRNA ligase, cytoplasmic (EC 6.1.1.7) (Alanyl-tRNA synthetase) (AlaRS) (Renal carcinoma antigen NY-REN-42)	AARS1 AARS	0.772795	0.797828	0.948854	-0.430521		0.969645	1.03315	1.04788	0.873305	-0.0378249		0.108071		1
Q96AG4	Leucine-rich repeat-containing protein 59 (Ribosome-binding protein p34) (p34) [Cleaved into: Leucine-rich repeat-containing protein 59, N-terminally processed]	LRRC59 PRO1855	1.21858	1.24687	1.07049	0.405377		1.11869	1.09384	1.06813	1.22683	0.300549		0.970693		1
P02786	Transferrin receptor protein 1 (TR) (TfR) (TfR1) (Trfr) (T9) (p90) (CD antigen CD71) [Cleaved into: Transferrin receptor protein 1, serum form (sTfR)]	TFRC	1.00823	0.90607	0.821909	-0.226995		0.607511	1.09409	1.20891	1.21643	0.393838	+	1.35773		1
P61978	Heterogeneous nuclear ribonucleoprotein K (hnRNP K) (Transformation up-regulated nuclear protein) (TUNP)	HNRNPK HNRPK	0.961836	1.05121	0.916515	-0.0585969		0.227703	0.969734	1.02315	0.996008	-0.0091472		0.0848651		1
Q04828	Aldo-keto reductase family 1 member C1 (EC 1.1.1.-) (EC 1.1.1.112) (EC 1.1.1.209) (EC 1.1.1.210) (EC 1.1.1.357) (EC 1.1.1.51) (EC 1.1.1.53) (EC 1.1.1.62) (EC 1.3.1.20) (20-alpha-hydroxysteroid dehydrogenase) (20-alpha-HSD) (EC 1.1.1.149) (Chlordecone reductase homolog HAKRC) (Dihydrodiol dehydrogenase 1) (DD1) (High-affinity hepatic bile acid-binding protein) (HBAB)	AKR1C1 DDH DDH1	1.03738	1.08059		0.141344		0.660573	0.997515	1.02551		0.028227		0.249737		1
O60506	Heterogeneous nuclear ribonucleoprotein Q (hnRNP Q) (Glycine- and tyrosine-rich RNA-binding protein) (GRY-RBP) (NS1-associated protein 1) (Synaptotagmin-binding, cytoplasmic RNA-interacting protein)	SYNCRIP HNRPQ NSAP1	0.949622	1.01073	0.965332	-0.0618624		0.514058	1.03103	0.983252	0.879111	-0.0892378		0.29942		1
P21796	Voltage-dependent anion-selective channel protein 1 (VDAC-1) (hVDAC1) (Outer mitochondrial membrane protein porin 1) (Plasmalemmal porin) (Porin 31HL) (Porin 31HM)	VDAC1 VDAC	0.949039	1.09001	0.718888	-0.207492		0.29713	1.03334	1.06737	1.13648	0.187675		0.941628		1
P13667	Protein disulfide-isomerase A4 (EC 5.3.4.1) (Endoplasmic reticulum resident protein 70) (ER protein 70) (ERp70) (Endoplasmic reticulum resident protein 72) (ER protein 72) (ERp-72) (ERp72)	PDIA4 ERP70 ERP72	1.18348	1.15452	1.03981	0.292544		1.008	1.08819	1.02582	0.970581	0.0685759		0.298026		1
Q16881	Thioredoxin reductase 1, cytoplasmic (TR) (EC 1.8.1.9) (Gene associated with retinoic and interferon-induced mortality 12 protein) (GRIM-12) (Gene associated with retinoic and IFN-induced mortality 12 protein) (KM-102-derived reductase-like factor) (Peroxidase TXNRD1) (EC 1.11.1.2) (Thioredoxin reductase TR1)	TXNRD1 GRIM12 KDRF	0.771023	0.780358	0.777756	-0.624257	+	3.6973	1.01573	1.09706	1.04867	0.129285		0.836395		1
Q16531	DNA damage-binding protein 1 (DDB p127 subunit) (DNA damage-binding protein a) (DDBa) (Damage-specific DNA-binding protein 1) (HBV X-associated protein 1) (XAP-1) (UV-damaged DNA-binding factor) (UV-damaged DNA-binding protein 1) (UV-DDB 1) (XPE-binding factor) (XPE-BF) (Xeroderma pigmentosum group E-complementing protein) (XPCe)	DDB1 XAP1	0.902393	0.93346	0.996462	-0.141857		0.738191	1.00431	0.967686	0.904758	-0.103461		0.529354		1
P14868	Aspartate--tRNA ligase, cytoplasmic (EC 6.1.1.12) (Aspartyl-tRNA synthetase) (AspRS) (Cell proliferation-inducing gene 40 protein)	DARS1 DARS PIG40	0.926431	0.965007	0.898075	-0.179412		1.14123	1.09054	1.16577	1.0394	0.231859		0.967046		1
Q7KZF4	Staphylococcal nuclease domain-containing protein 1 (EC 3.1.31.1) (100 kDa coactivator) (EBNA2 coactivator p100) (Tudor domain-containing protein 11) (p100 co-activator)	SND1 TDRD11	1.01843	0.997865	1.05249	0.0559128		0.544533	1.04284	1.03079	0.933639	0.00596662		0.0106429		1
P07910	Heterogeneous nuclear ribonucleoproteins C1/C2 (hnRNP C1/C2)	HNRNPC HNRPC	0.85372	0.856966	0.882205	-0.359682	+	2.30043	1.11743	0.963388	1.02465	0.0852181		0.278489		1
Q12905	Interleukin enhancer-binding factor 2 (Nuclear factor of activated T-cells 45 kDa)	ILF2 NF45 PRO3063	0.976588	1.09614	0.861547	-0.0546295		0.133417	1.03071	1.06004	0.997135	0.0712116		0.606321		1
P15880	40S ribosomal protein S2 (40S ribosomal protein S4) (Protein LLRep3) (Small ribosomal subunit protein uS5)	RPS2 RPS4	1.03079	0.891703	0.944945	-0.111458		0.419316	0.928943	1.03874	0.927882	-0.0873859		0.367878		1
P62136	Serine/threonine-protein phosphatase PP1-alpha catalytic subunit (PP-1A) (EC 3.1.3.16)	PPP1CA PPP1A	0.955038	0.847952	0.947127	-0.214491		0.831298	1.04072	1.06091	1.03612	0.110717	+	1.59868		1
P14923	Junction plakoglobin (Catenin gamma) (Desmoplakin III) (Desmoplakin-3)	JUP CTNNG DP3	1.08595	1.01637	0.820956	-0.0638998		0.133987	1.09838	1.21841	0.872258	0.150718		0.184663		1
P17844	Probable ATP-dependent RNA helicase DDX5 (EC 3.6.4.13) (DEAD box protein 5) (RNA helicase p68)	DDX5 G17P1 HELR HLR1	1.06839	0.981214	0.949599	-0.000658824		0.0134039	0.97851	1.06856	0.997348	0.036252		0.18489		1
P42330	Aldo-keto reductase family 1 member C3 (EC 1.1.1.-) (EC 1.1.1.210) (EC 1.1.1.53) (EC 1.1.1.62) (17-beta-hydroxysteroid dehydrogenase type 5) (17-beta-HSD 5) (3-alpha-HSD type II, brain) (3-alpha-hydroxysteroid dehydrogenase type 2) (3-alpha-HSD type 2) (EC 1.1.1.357) (Chlordecone reductase homolog HAKRb) (Dihydrodiol dehydrogenase 3) (DD-3) (DD3) (Dihydrodiol dehydrogenase type I) (HA1753) (Prost…	AKR1C3 DDH1 HSD17B5 KIAA0119 PGFS	0.695327	0.848489	0.812781	-0.59535		1.25271	1.0493	1.36448	1.00819	0.324572		0.486301		1
O75874	Isocitrate dehydrogenase [NADP] cytoplasmic (IDH) (IDH1) (EC 1.1.1.42) (Cytosolic NADP-isocitrate dehydrogenase) (IDPc) (NADP(+)-specific ICDH) (Oxalosuccinate decarboxylase)	IDH1 PICD	0.674273	0.742397	0.748245	-0.804585	+	1.9875	0.963879	0.92923	0.892369	-0.182982		1.10501		1
P62906	60S ribosomal protein L10a (CSA-19) (Large ribosomal subunit protein uL1) (Neural precursor cell expressed developmentally down-regulated protein 6) (NEDD-6)	RPL10A NEDD6	0.881127	0.855296	0.92381	-0.296447	+	1.48336	1.01345	1.05268	1.00303	0.0562064		0.578136		1
P60981	Destrin (Actin-depolymerizing factor) (ADF)	DSTN ACTDP DSN	0.617138	0.939687	0.992098	-0.401864		0.463115	0.923431	1.01503	0.954275	-0.0897955		0.506007		1
P07737	Profilin-1 (Epididymis tissue protein Li 184a) (Profilin I)	PFN1	0.883338	1.01085	0.959093	-0.123668		0.496877	1.13378	1.18055	0.613674	-0.0599076		0.104582		1
P20700	Lamin-B1	LMNB1 LMN2 LMNB	0.854945	0.989288	0.94207	-0.182252		0.658529	1.0699	0.899647	1.00668	-0.0196257		0.0679708		1
P05141	ADP/ATP translocase 2 (ADP,ATP carrier protein 2) (ADP,ATP carrier protein, fibroblast isoform) (Adenine nucleotide translocator 2) (ANT 2) (Solute carrier family 25 member 5) [Cleaved into: ADP/ATP translocase 2, N-terminally processed]	SLC25A5 AAC2 ANT2	0.848504	0.855761	0.835021	-0.411204	+	2.7318	1.00779	1.07897	1.11831	0.16308		0.779406		1
P63104	14-3-3 protein zeta/delta (Protein kinase C inhibitor protein 1) (KCIP-1)	YWHAZ	0.837085	0.873107	0.918179	-0.326163	+	1.41893	0.990324	1.07053	1.141	0.1606		0.582617		1
Q99714	3-hydroxyacyl-CoA dehydrogenase type-2 (EC 1.1.1.35) (17-beta-estradiol 17-dehydrogenase) (EC 1.1.1.62) (2-methyl-3-hydroxybutyryl-CoA dehydrogenase) (MHBD) (3-alpha-(17-beta)-hydroxysteroid dehydrogenase (NAD(+))) (EC 1.1.1.239) (3-hydroxy-2-methylbutyryl-CoA dehydrogenase) (EC 1.1.1.178) (3-hydroxyacyl-CoA dehydrogenase type II) (3alpha(or 20beta)-hydroxysteroid dehydrogenase) (EC 1.1.1.53) (7-…	HSD17B10 ERAB HADH2 MRPP2 SCHAD SDR5C1 XH98G2	0.970015	0.868766	1.08577	-0.0628221		0.160745	1.02377	0.974734	1.04264	0.0335916		0.237702		1
P62701	40S ribosomal protein S4, X isoform (SCR10) (Single copy abundant mRNA protein) (Small ribosomal subunit protein eS4)	RPS4X CCG2 RPS4 SCAR	1.01316	0.909344	0.859647	-0.185933		0.605153	0.988023	0.987413	1.06292	0.0313321		0.174059		1
P26038	Moesin (Membrane-organizing extension spike protein)	MSN	2.91507	2.45361	3.68363	2.72381	+	1.94081	0.949678	0.974143	0.934381	-0.119418		1.24362		1
P39019	40S ribosomal protein S19 (Small ribosomal subunit protein eS19)	RPS19	0.958502	0.910942	0.837075	-0.253903		0.927691	0.948181	1.14897	0.971217	0.0555717		0.105156		1
P33176	Kinesin-1 heavy chain (Conventional kinesin heavy chain) (Ubiquitous kinesin heavy chain) (UKHC)	KIF5B KNS KNS1	0.927016	0.834103	0.872457	-0.321284		1.29825	1.0218	0.934301	1.03511	-0.00723674		0.0393498		1
P07099	Epoxide hydrolase 1 (EC 3.3.2.9) (Epoxide hydratase) (Microsomal epoxide hydrolase) (mEH)	EPHX1 EPHX EPOX	0.699716	0.722072	0.748795	-0.798137	+	2.43956	1.08132	0.991426	0.960537	0.0272093		0.0923155		1
Q8NC51	Plasminogen activator inhibitor 1 RNA-binding protein (PAI1 RNA-binding protein 1) (PAI-RBP1) (SERPINE1 mRNA-binding protein 1)	SERBP1 PAIRBP1 CGI-55	1.05301	1.00174	1.1195	0.139252		0.644452	1.07071	1.04463	0.957163	0.0588932		0.242083		1
P13010	X-ray repair cross-complementing protein 5 (EC 3.6.4.-) (86 kDa subunit of Ku antigen) (ATP-dependent DNA helicase 2 subunit 2) (ATP-dependent DNA helicase II 80 kDa subunit) (CTC box-binding factor 85 kDa subunit) (CTC85) (CTCBF) (DNA repair protein XRCC5) (Ku80) (Ku86) (Lupus Ku autoantigen protein p86) (Nuclear factor IV) (Thyroid-lupus autoantigen) (TLAA) (X-ray repair complementing defective…	XRCC5 G22P2	0.9657	1.01048	0.984516	-0.0325275		0.380928	1.06862	0.949635	0.903894	-0.0648454		0.20705		1
O00299	Chloride intracellular channel protein 1 (Chloride channel ABP) (Nuclear chloride ion channel 27) (NCC27) (Regulatory nuclear chloride ion channel protein) (hRNCC)	CLIC1 G6 NCC27	1.01384	1.01529	1.10872	0.110799		0.560689	1.00456	1.08488	0.993157	0.066982		0.354631		1
P61604	10 kDa heat shock protein, mitochondrial (Hsp10) (10 kDa chaperonin) (Chaperonin 10) (CPN10) (Early-pregnancy factor) (EPF)	HSPE1	1.04717	1.12304	0.961186	0.105725		0.337387	1.2112	0.907426	0.988357	0.0864197		0.109065		1
P61158	Actin-related protein 3 (Actin-like protein 3)	ACTR3 ARP3	1.0987	1.04047	1.01671	0.124931		0.793063	1.00536	1.17069	1.07256	0.196354		0.656772		1
P11586	C-1-tetrahydrofolate synthase, cytoplasmic (C1-THF synthase) (Epididymis secretory sperm binding protein) [Cleaved into: C-1-tetrahydrofolate synthase, cytoplasmic, N-terminally processed] [Includes: Methylenetetrahydrofolate dehydrogenase (EC 1.5.1.5); Methenyltetrahydrofolate cyclohydrolase (EC 3.5.4.9); Formyltetrahydrofolate synthetase (EC 6.3.4.3)]	MTHFD1 MTHFC MTHFD	0.702731	0.597592	0.651034	-1.06073	+	1.9384	0.966645	0.96426	0.868727	-0.170482		0.73595		1
O43390	Heterogeneous nuclear ribonucleoprotein R (hnRNP R)	HNRNPR HNRPR	0.98166	1.14478	1.01261	0.111739		0.341434	1.03103	0.892592	0.956534	-0.100547		0.382269		1
Q92973	Transportin-1 (Importin beta-2) (Karyopherin beta-2) (M9 region interaction protein) (MIP)	TNPO1 KPNB2 MIP1 TRN	0.809106	0.926261	0.928488	-0.29309		0.93106	1.04131	1.04059	0.984719	0.0541736		0.439883		1
O75367	Core histone macro-H2A.1 (Histone macroH2A1) (mH2A1) (Histone H2A.y) (H2A/y) (Medulloblastoma antigen MU-MB-50.205)	MACROH2A1 H2AFY	1.19877	1.07287	0.98976	0.20605		0.545966	1.32853	1.03684	1.17995	0.41192		0.817887		1
P22314	Ubiquitin-like modifier-activating enzyme 1 (EC 6.2.1.45) (Protein A1S9) (Ubiquitin-activating enzyme E1)	UBA1 A1S9T UBE1	0.849838	1.15186	0.979933	-0.0151478		0.0510704	0.914041	0.867392	0.877429	-0.297718	+	1.77389		1
P22234	Bifunctional phosphoribosylaminoimidazole carboxylase/phosphoribosylaminoimidazole succinocarboxamide synthetase (PAICS) [Includes: Phosphoribosylaminoimidazole carboxylase (EC 4.1.1.21) (AIR carboxylase) (AIRC); Phosphoribosylaminoimidazole succinocarboxamide synthetase (EC 6.3.2.6) (SAICAR synthetase)]	PAICS ADE2 AIRC PAIS	1.05001	1.03681	0.959014	0.0373941		0.178736	0.960442	1.1112	1.06239	0.107793		0.362584		1
P06493	Cyclin-dependent kinase 1 (CDK1) (EC 2.7.11.22) (EC 2.7.11.23) (Cell division control protein 2 homolog) (Cell division protein kinase 1) (p34 protein kinase)	CDK1 CDC2 CDC28A CDKN1 P34CDC2	1.29452	1.10235	1.22581	0.46515		1.23282	0.944065	0.949817	0.939611	-0.140831	+	2.52525		1
P05187	Alkaline phosphatase, placental type (EC 3.1.3.1) (Alkaline phosphatase Regan isozyme) (Placental alkaline phosphatase 1) (PLAP-1)	ALPP PLAP	0.177947	0.261994	0.171338	-3.92343	+	2.15309	1.03652	0.854814	0.913025	-0.166317		0.471167		1
P62879	Guanine nucleotide-binding protein G(I)/G(S)/G(T) subunit beta-2 (G protein subunit beta-2) (Transducin beta chain 2)	GNB2	0.943691	0.963849	0.927635	-0.139368	+	1.44151	1.23378	1.10485	1.04037	0.293412		0.83896		1
P30419	Glycylpeptide N-tetradecanoyltransferase 1 (EC 2.3.1.97) (Myristoyl-CoA:protein N-myristoyltransferase 1) (HsNMT1) (NMT 1) (Type I N-myristoyltransferase) (Peptide N-myristoyltransferase 1) (Protein-lysine myristoyltransferase NMT1) (EC 2.3.1.-)	NMT1 NMT	1.07891	1.13028	1.18415	0.303856	+	1.34765	0.974895	1.0473	0.906962	-0.0589356		0.221714		1
P07339	Cathepsin D (EC 3.4.23.5) [Cleaved into: Cathepsin D light chain; Cathepsin D heavy chain]	CTSD CPSD	1.27535	1.55031	1.39987	0.844791	+	1.57663	1.20419	1.07767	1.16164	0.340045		1.27854		1
Q15365	Poly(rC)-binding protein 1 (Alpha-CP1) (Heterogeneous nuclear ribonucleoprotein E1) (hnRNP E1) (Nucleic acid-binding protein SUB2.3)	PCBP1	0.925157	0.891952	0.932901	-0.214588	+	1.61815	0.948869	1.04997	1.01808	0.0138708		0.0510927		1
P37837	Transaldolase (EC 2.2.1.2)	TALDO1 TAL TALDO TALDOR	1.06774	1.20531	1.10977	0.296197		1.09789	1.16085	1.05692	1.10356	0.250964		1.18682		1
Q8NBS9	Thioredoxin domain-containing protein 5 (EC 1.8.4.-) (EC 5.3.4.1) (Endoplasmic reticulum resident protein 46) (ER protein 46) (ERp46) (Thioredoxin-like protein p46)	TXNDC5 TLP46 UNQ364/PRO700	1.12028	1.19056	1.42727	0.542506		1.00764	1.10507	0.987175	1.05346	0.116967		0.534708		1
Q9UQ80	Proliferation-associated protein 2G4 (Cell cycle protein p38-2G4 homolog) (hG4-1) (ErbB3-binding protein 1)	PA2G4 EBP1	0.707983	0.871407	0.749926	-0.624067		1.27205	0.995719	1.09449	1.03551	0.101241		0.553388		1
P16435	NADPH--cytochrome P450 reductase (CPR) (P450R) (EC 1.6.2.4)	POR CYPOR	0.992863	0.851212	0.905975	-0.214551		0.733432	1.08339	1.04085	1.07157	0.155944	+	1.46771		1
P40121	Macrophage-capping protein (Actin regulatory protein CAP-G)	CAPG AFCP MCP	1.21198	1.23227	1.2854	0.53692	+	2.19229	1.09908	1.08831	0.947655	0.108593		0.32356		1
P12270	Nucleoprotein TPR (Megator) (NPC-associated intranuclear protein) (Translocated promoter region protein)	TPR	0.905693	0.975661	0.931904	-0.158507		1.01685	1.06898	1.02162	1.0354	0.101474		1.03197		1
P07355	Annexin A2 (Annexin II) (Annexin-2) (Calpactin I heavy chain) (Calpactin-1 heavy chain) (Chromobindin-8) (Lipocortin II) (Placental anticoagulant protein IV) (PAP-IV) (Protein I) (p36)	ANXA2 ANX2 ANX2L4 CAL1H LPC2D	0.877041	0.934246	0.912254	-0.238441	+	1.46572	1.12967	0.986442	1.14644	0.206922		0.638284		1
P62805	Histone H4	H4C1 H4/A H4FA HIST1H4A; H4C2 H4/I H4FI HIST1H4B; H4C3 H4/G H4FG HIST1H4C; H4C4 H4/B H4FB HIST1H4D; H4C5 H4/J H4FJ HIST1H4E; H4C6 H4/C H4FC HIST1H4F; H4C8 H4/H H4FH HIST1H4H; H4C9 H4/M H4FM HIST1H4I; H4C11 H4/E H4FE HIST1H4J; H4C12 H4/D H4FD HIST1H4K; H4C13 H4/K H4FK HIST1H4L; H4C14 H4/N H4F2 H4FN HIST2H4 HIST2H4A; H4C15 H4/O H4FO HIST2H4B; H4C16 H4-16 HIST4H4	0.718849	0.88486	0.817718	-0.528419		1.15923	0.853763	0.970045	1.3032	0.102263		0.0665901		1
P63244	Receptor of activated protein C kinase 1 (Cell proliferation-inducing gene 21 protein) (Guanine nucleotide-binding protein subunit beta-2-like 1) (Guanine nucleotide-binding protein subunit beta-like protein 12.3) (Human lung cancer oncogene 7 protein) (HLC-7) (Receptor for activated C kinase) (Small ribosomal subunit protein RACK1) [Cleaved into: Receptor of activated protein C kinase 1, N-termi…	RACK1 GNB2L1 HLC7 PIG21	0.956614	1.11234	1.02195	0.073628		0.230901	1.24196	1.16526	1.03446	0.338735		0.890377		1
O00571	ATP-dependent RNA helicase DDX3X (EC 3.6.4.13) (CAP-Rf) (DEAD box protein 3, X-chromosomal) (DEAD box, X isoform) (DBX) (Helicase-like protein 2) (HLP2)	DDX3X DBX DDX3	1.02538	1.04982	1.05825	0.107338	+	1.35271	1.08315	1.07289	1.09357	0.197116	+	2.32578		1
P08195	4F2 cell-surface antigen heavy chain (4F2hc) (4F2 heavy chain antigen) (Lymphocyte activation antigen 4F2 large subunit) (Solute carrier family 3 member 2) (CD antigen CD98)	SLC3A2 MDU1	1.02906	0.865103	0.776436	-0.28685		0.564943	0.97644	0.995561	1.07819	0.0409217		0.182456		1
Q9C0C2	182 kDa tankyrase-1-binding protein	TNKS1BP1 KIAA1741 TAB182	0.750732	0.946812	1.04581	-0.220563		0.376601	0.940372	0.867869	0.79186	-0.352835		1.00268		1
P27348	14-3-3 protein theta (14-3-3 protein T-cell) (14-3-3 protein tau) (Protein HS1)	YWHAQ	0.985614	1.01225	1.02504	0.0187576		0.233257	1.14345	1.1231	1.12635	0.303536	+	2.69014		1
P62195	26S proteasome regulatory subunit 8 (26S proteasome AAA-ATPase subunit RPT6) (Proteasome 26S subunit ATPase 5) (Proteasome subunit p45) (Thyroid hormone receptor-interacting protein 1) (TRIP1) (p45/SUG)	PSMC5 SUG1	1.12621	1.49224	1.30133	0.659547		1.07132	0.972252	1.02376	0.905036	-0.0827223		0.363775		1
P51648	Aldehyde dehydrogenase family 3 member A2 (EC 1.2.1.3) (EC 1.2.1.94) (Aldehyde dehydrogenase 10) (Fatty aldehyde dehydrogenase) (Microsomal aldehyde dehydrogenase)	ALDH3A2 ALDH10 FALDH	0.841776	1.04197	0.73167	-0.338352		0.542264	1.32301	1	1.036	0.27878		0.449988		1
P23396	40S ribosomal protein S3 (EC 4.2.99.18) (Small ribosomal subunit protein uS3)	RPS3 OK/SW-cl.26	0.917672	0.821529	0.883786	-0.331221		1.27511	0.919021	0.958731	1.03798	-0.0702647		0.308158		1
P13645	Keratin, type I cytoskeletal 10 (Cytokeratin-10) (CK-10) (Keratin-10) (K10)	KRT10 KPP	1.38168	1.79372		1.14013		0.748943	0.894632	0.869033		-0.310145		1.13607		1
P39023	60S ribosomal protein L3 (HIV-1 TAR RNA-binding protein B) (TARBP-B) (Large ribosomal subunit protein uL3)	RPL3 OK/SW-cl.32	1.17566	1.0172	1.02858	0.175635		0.558898	0.958921	1.0225	0.968136	-0.0418245		0.32166		1
P40925	Malate dehydrogenase, cytoplasmic (EC 1.1.1.37) (Aromatic alpha-keto acid reductase) (KAR) (EC 1.1.1.96) (Cytosolic malate dehydrogenase)	MDH1 MDHA	0.852165	0.999932	1.00072	-0.124069		0.371606	0.832271	1.0943	1.04617	-0.0225133		0.0621194		1
Q15046	Lysine--tRNA ligase (EC 2.7.7.-) (EC 6.1.1.6) (Lysyl-tRNA synthetase) (LysRS)	KARS1 KARS KIAA0070	0.802354	0.914488	0.941481	-0.298218		0.889429	0.91089	0.913096	0.889503	-0.247559	+	2.16474		1
P05556	Integrin beta-1 (Fibronectin receptor subunit beta) (Glycoprotein IIa) (GPIIA) (VLA-4 subunit beta) (CD antigen CD29)	ITGB1 FNRB MDF2 MSK12	0.900802	1.04906	1.04739	-0.00226552		0.0213191	0.975976	1.02676	1.14168	0.115955		0.362576		1
P09936	Ubiquitin carboxyl-terminal hydrolase isozyme L1 (UCH-L1) (EC 3.4.19.12) (Neuron cytoplasmic protein 9.5) (PGP 9.5) (PGP9.5) (Ubiquitin thioesterase L1)	UCHL1	0.501316	0.445677	0.54806	-1.71766	+	2.14033	0.998516	1.0158	0.96651	-0.0158167		0.158517		1
P48047	ATP synthase subunit O, mitochondrial (ATP synthase peripheral stalk subunit OSCP) (Oligomycin sensitivity conferral protein) (OSCP)	ATP5PO ATP5O ATPO	0.897232	0.899731	0.835024	-0.322773	+	1.48366	1.04894	0.992494	1.08957	0.105413		0.58311		1
O94826	Mitochondrial import receptor subunit TOM70 (Mitochondrial precursor proteins import receptor) (Translocase of outer membrane 70 kDa subunit) (Translocase of outer mitochondrial membrane protein 70)	TOMM70 KIAA0719 TOM70 TOMM70A	1.10844	1.1525	1.11918	0.294228	+	2.02047	1.04028	1.02113	1.01764	0.0641477		1.20189		1
P55263	Adenosine kinase (AK) (EC 2.7.1.20) (Adenosine 5'-phosphotransferase)	ADK	0.928365	0.880929	1.08868	-0.0853318		0.21824	1.06362	1.13909	0.952881	0.124706		0.342683		1
Q99536	Synaptic vesicle membrane protein VAT-1 homolog (EC 1.-.-.-)	VAT1	1.25687	1.18244	1.28876	0.535881	+	1.865	0.98471	0.972487	0.968455	-0.0618924	+	1.42674		1
P61247	40S ribosomal protein S3a (Small ribosomal subunit protein eS1) (v-fos transformation effector protein) (Fte-1)	RPS3A FTE1 MFTL	0.956541	0.898711	0.933675	-0.17993		1.25003	0.914867	1.05854	0.838808	-0.159422		0.382196		1
P16615	Sarcoplasmic/endoplasmic reticulum calcium ATPase 2 (SERCA2) (SR Ca(2+)-ATPase 2) (EC 7.2.2.10) (Calcium pump 2) (Calcium-transporting ATPase sarcoplasmic reticulum type, slow twitch skeletal muscle isoform) (Endoplasmic reticulum class 1/2 Ca(2+) ATPase)	ATP2A2 ATP2B	0.674892	0.742606	0.758569	-0.791914	+	1.91347	1.08685	0.908444	0.921168	-0.0696545		0.195116		1
P30048	Thioredoxin-dependent peroxide reductase, mitochondrial (EC 1.11.1.24) (Antioxidant protein 1) (AOP-1) (HBC189) (Peroxiredoxin III) (Prx-III) (Peroxiredoxin-3) (Protein MER5 homolog) (Thioredoxin-dependent peroxiredoxin 3)	PRDX3 AOP1	0.932789	1.15592	0.720466	-0.162087		0.221344	1.12544	0.974604	1.07181	0.137381		0.481556		1
Q07021	Complement component 1 Q subcomponent-binding protein, mitochondrial (ASF/SF2-associated protein p32) (Glycoprotein gC1qBP) (C1qBP) (Hyaluronan-binding protein 1) (Mitochondrial matrix protein p32) (gC1q-R protein) (p33) (SF2AP32)	C1QBP GC1QBP HABP1 SF2P32	1.0417	1.24372	1.18904	0.362126		0.944523	0.961769	0.983086	1.09555	0.0329996		0.0979719		1
P05198	Eukaryotic translation initiation factor 2 subunit 1 (Eukaryotic translation initiation factor 2 subunit alpha) (eIF-2-alpha) (eIF-2A) (eIF-2alpha)	EIF2S1 EIF2A	0.80002	1.00008	1.08446	-0.0967808		0.183926	1.13539	1.0988	0.962304	0.156466		0.454076		1
P28066	Proteasome subunit alpha type-5 (Macropain zeta chain) (Multicatalytic endopeptidase complex zeta chain) (Proteasome zeta chain)	PSMA5	1.12779	1.09169	1.13253	0.27363	+	1.96681	1.01276	1.02032	0.953109	-0.0113829		0.0778554		1
Q08043	Alpha-actinin-3 (Alpha-actinin skeletal muscle isoform 3) (F-actin cross-linking protein)	ACTN3	0.740342			-0.741478			1.20771			0.465463				1
Q9Y617	Phosphoserine aminotransferase (EC 2.6.1.52) (Phosphohydroxythreonine aminotransferase) (PSAT)	PSAT1 PSA	0.563317	0.492402	0.753359	-1.24744		1.27372	0.967424	0.886008	0.956409	-0.161504		0.858858		1
O95831	Apoptosis-inducing factor 1, mitochondrial (EC 1.6.99.-) (Programmed cell death protein 8)	AIFM1 AIF PDCD8	1.02201	1.11743	0.992705	0.106313		0.442455	0.962322	1.00705	0.987472	-0.0357385		0.41913		1
P00390	Glutathione reductase, mitochondrial (GR) (GRase) (EC 1.8.1.7)	GSR GLUR GRD1	0.941921	0.958964	0.971321	-0.107363	+	1.4053	1.00633	1.16649	0.916385	0.0722626		0.117976		1
Q01518	Adenylyl cyclase-associated protein 1 (CAP 1)	CAP1 CAP	0.941658	1.01735	0.986768	-0.0449853		0.307894	1.05217	1.04241	1.00624	0.0815238		0.863971		1
P62333	26S proteasome regulatory subunit 10B (26S proteasome AAA-ATPase subunit RPT4) (Proteasome 26S subunit ATPase 6) (Proteasome subunit p42)	PSMC6 SUG2	0.904913	1.01688	1.6842	0.453766		0.280931	0.959388	0.999816	1.04089	7.59191e-05		0.00687754		1
Q99880	Histone H2B type 1-L (Histone H2B.c) (H2B/c)	H2BC13 H2BFC HIST1H2BL	0.882652			-0.307855			0.952915			-0.118949				1
Q9P2J5	Leucine--tRNA ligase, cytoplasmic (EC 6.1.1.4) (Leucyl-tRNA synthetase) (LeuRS)	LARS1 KIAA1352 LARS	1.09089	1.17674	1.19719	0.355262	+	1.42559	0.937961	0.976928	0.928579	-0.132165		1.13081		1
P47895	Aldehyde dehydrogenase family 1 member A3 (EC 1.2.1.36) (Aldehyde dehydrogenase 6) (Retinaldehyde dehydrogenase 3) (RALDH-3) (RalDH3)	ALDH1A3 ALDH6	1.76176	1.70783	1.98649	1.47514	+	2.22723	0.956713	0.960144	0.907074	-0.149169		1.09417		1
P30086	Phosphatidylethanolamine-binding protein 1 (PEBP-1) (HCNPpp) (Neuropolypeptide h3) (Prostatic-binding protein) (Raf kinase inhibitor protein) (RKIP) [Cleaved into: Hippocampal cholinergic neurostimulating peptide (HCNP)]	PEBP1 PBP PEBP	0.64428	0.911714	0.667229	-0.739039		0.976628	0.993156	0.884672	0.906962	-0.183591		0.784718		1
Q14914	Prostaglandin reductase 1 (PRG-1) (15-oxoprostaglandin 13-reductase) (EC 1.3.1.48) (Dithiolethione-inducible gene 1 protein) (D3T-inducible gene 1 protein) (DIG-1) (Leukotriene B4 12-hydroxydehydrogenase) (NAD(P)H-dependent alkenal/one oxidoreductase) (EC 1.3.1.74)	PTGR1 LTB4DH	0.542655	0.620587	0.622384	-1.27962	+	2.12765	0.939997	1.10644	1.03952	0.0696706		0.194584		1
P32119	Peroxiredoxin-2 (EC 1.11.1.24) (Natural killer cell-enhancing factor B) (NKEF-B) (PRP) (Thiol-specific antioxidant protein) (TSA) (Thioredoxin peroxidase 1) (Thioredoxin-dependent peroxide reductase 1) (Thioredoxin-dependent peroxiredoxin 2)	PRDX2 NKEFB TDPX1	1.02553	0.874236	1.16494	0.0526295		0.0567341	0.942926	0.934894	1.24067	0.0955324		0.108745		1
Q14126	Desmoglein-2 (Cadherin family member 5) (HDGC)	DSG2 CDHF5	0.853912	1.08389	0.791688	-0.23306		0.411417	0.972585	1.0009	1.23344	0.164505		0.300139		1
Q08380	Galectin-3-binding protein (Basement membrane autoantigen p105) (Lectin galactoside-binding soluble 3-binding protein) (Mac-2-binding protein) (MAC2BP) (Mac-2 BP) (Tumor-associated antigen 90K)	LGALS3BP M2BP	0.905117	0.982113	0.988906	-0.103991		0.568851	1.18286	1.05944	1.04483	0.225432		0.826006		1
Q9BSJ8	Extended synaptotagmin-1 (E-Syt1) (Membrane-bound C2 domain-containing protein)	ESYT1 FAM62A KIAA0747 MBC2	0.631701	0.616462	0.708627	-1.05387	+	2.00567	0.9611	1.02782	1.02657	0.0127069		0.0691142		1
Q92900	Regulator of nonsense transcripts 1 (EC 3.6.4.12) (EC 3.6.4.13) (ATP-dependent helicase RENT1) (Nonsense mRNA reducing factor 1) (NORF1) (Up-frameshift suppressor 1 homolog) (hUpf1)	UPF1 KIAA0221 RENT1	1.27166	1.03452	1.11057	0.32081		0.764189	1.08134	1.09564	0.997006	0.13904		0.697692		1
P62979	Ubiquitin-40S ribosomal protein S27a (Ubiquitin carboxyl extension protein 80) [Cleaved into: Ubiquitin; 40S ribosomal protein S27a (Small ribosomal subunit protein eS31)]	RPS27A UBA80 UBCEP1	0.978317		0.903034	-0.150831		0.437442	1.33439		0.97226	0.351812		0.25035		1
Q16543	Hsp90 co-chaperone Cdc37 (Hsp90 chaperone protein kinase-targeting subunit) (p50Cdc37) [Cleaved into: Hsp90 co-chaperone Cdc37, N-terminally processed]	CDC37 CDC37A	0.928511	1.16122	1.02785	0.0948228		0.187669	1.22679	1.04803	0.944721	0.174186		0.31575		1
P00505	Aspartate aminotransferase, mitochondrial (mAspAT) (EC 2.6.1.1) (EC 2.6.1.7) (Fatty acid-binding protein) (FABP-1) (Glutamate oxaloacetate transaminase 2) (Kynurenine aminotransferase 4) (Kynurenine aminotransferase IV) (Kynurenine--oxoglutarate transaminase 4) (Kynurenine--oxoglutarate transaminase IV) (Plasma membrane-associated fatty acid-binding protein) (FABPpm) (Transaminase A)	GOT2 KYAT4	0.879653	1.00974	0.930018	-0.153116		0.597209	0.971322	0.996233	1.15107	0.0956434		0.246522		1
P30520	Adenylosuccinate synthetase isozyme 2 (AMPSase 2) (AdSS 2) (EC 6.3.4.4) (Adenylosuccinate synthetase, acidic isozyme) (Adenylosuccinate synthetase, liver isozyme) (L-type adenylosuccinate synthetase) (IMP--aspartate ligase 2)	ADSS2 ADSS	1.04785	0.959854	1.06245	0.0570063		0.252822	0.894016	1.22714	1.12208	0.192274		0.268519		1
P63010	AP-2 complex subunit beta (AP105B) (Adaptor protein complex AP-2 subunit beta) (Adaptor-related protein complex 2 subunit beta) (Beta-2-adaptin) (Beta-adaptin) (Clathrin assembly protein complex 2 beta large chain) (Plasma membrane adaptor HA2/AP2 adaptin beta subunit)	AP2B1 ADTB2 CLAPB1	1.0267		1.11138	0.164648		0.463036	1.01612		0.984361	0.000590722		0.00198105		1
P12004	Proliferating cell nuclear antigen (PCNA) (Cyclin)	PCNA	0.659012	0.806829	0.431902	-1.12944		0.932753	0.966726	1.13546	0.731079	-0.141028		0.2034		1
P41252	Isoleucine--tRNA ligase, cytoplasmic (EC 6.1.1.5) (Isoleucyl-tRNA synthetase) (IRS) (IleRS)	IARS1 IARS	0.996069	0.941652	1.1223	0.0488586		0.112186	0.925899	0.873299	0.936479	-0.227475		1.29749		1
Q9NZB2	Constitutive coactivator of PPAR-gamma-like protein 1 (Oxidative stress-associated Src activator) (Protein FAM120A)	FAM120A C9orf10 KIAA0183 OSSA	0.925465	0.898503	1.00453	-0.145181		0.669565	1.03679	1.01447	1.09041	0.113804		0.779678		1
P30838	Aldehyde dehydrogenase, dimeric NADP-preferring (EC 1.2.1.5) (ALDHIII) (Aldehyde dehydrogenase 3) (Aldehyde dehydrogenase family 3 member A1)	ALDH3A1 ALDH3	0.568991	0.570735	0.718176	-1.18176	+	1.61378	0.930493	0.912563	0.913778	-0.208475	+	2.26264		1
P14314	Glucosidase 2 subunit beta (80K-H protein) (Glucosidase II subunit beta) (Protein kinase C substrate 60.1 kDa protein heavy chain) (PKCSH)	PRKCSH G19P1	0.966993	0.985868	0.762903	-0.245494		0.485769	1.02109	0.95591	0.907986	-0.0964151		0.446306		1
Q9UNM6	26S proteasome non-ATPase regulatory subunit 13 (26S proteasome regulatory subunit RPN9) (26S proteasome regulatory subunit S11) (26S proteasome regulatory subunit p40.5)	PSMD13	1.11559	1.00975	1.09715	0.176442		0.826365	0.959726	1.05342	0.856668	-0.109419		0.295121		1
Q01813	ATP-dependent 6-phosphofructokinase, platelet type (ATP-PFK) (PFK-P) (EC 2.7.1.11) (6-phosphofructokinase type C) (Phosphofructo-1-kinase isozyme C) (PFK-C) (Phosphohexokinase)	PFKP PFKF	1.00759	1.00934	1.15516	0.137571		0.446869	1.12687	1.10736	1.18341	0.321452	+	1.64562		1
P35232	Prohibitin 1	PHB1 PHB	0.833705	0.975093	0.836357	-0.310464		0.883839	1.02693	0.975157	1.02873	0.0252085		0.201424		1
P00492	Hypoxanthine-guanine phosphoribosyltransferase (HGPRT) (HGPRTase) (EC 2.4.2.8)	HPRT1 HPRT	0.921766	0.905734	0.980478	-0.16314		0.962457	1.08296	1.15682	1.23888	0.365101		1.19653		1
Q8NBJ7	Inactive C-alpha-formylglycine-generating enzyme 2 (Paralog of formylglycine-generating enzyme) (pFGE) (Sulfatase-modifying factor 2)	SUMF2 PSEC0171 UNQ1968/PRO4500	1.10995	1.13186	1.13429	0.291292	+	2.46852	1.18076	1.05857	0.986851	0.179271		0.505629		1
P62826	GTP-binding nuclear protein Ran (EC 3.6.5.-) (Androgen receptor-associated protein 24) (GTPase Ran) (Ras-like protein TC4) (Ras-related nuclear protein)	RAN ARA24 OK/SW-cl.81	0.782742	0.727536	0.727119	-0.723364	+	2.16341	1.28152	0.812784	1.1337	0.180661		0.140737		1
Q9NY33	Dipeptidyl peptidase 3 (EC 3.4.14.4) (Dipeptidyl aminopeptidase III) (Dipeptidyl arylamidase III) (Dipeptidyl peptidase III) (DPP III) (Enkephalinase B)	DPP3	0.93839	1.04445	1.10245	0.0691439		0.193628	1.02328	0.932961	0.954739	-0.0742924		0.418379		1
P55010	Eukaryotic translation initiation factor 5 (eIF-5)	EIF5	0.811771	0.717227	0.624248	-0.817913	+	1.3276	1.06008	1.10982	0.843702	0.0111548		0.0090458		1
P49591	Serine--tRNA ligase, cytoplasmic (EC 6.1.1.11) (Seryl-tRNA synthetase) (SerRS) (Seryl-tRNA(Ser/Sec) synthetase)	SARS1 SARS SERS	0.729913	0.807183	0.915007	-0.497371		1.05699	0.928515	1.02596	1.14228	0.0782881		0.164839		1
P09429	High mobility group protein B1 (High mobility group protein 1) (HMG-1)	HMGB1 HMG1	1.01107	0.965709	1.02313	-7.22298e-05		0.00593163	0.992125	0.975764	0.903953	-0.107676		0.583579		1
P09651	Heterogeneous nuclear ribonucleoprotein A1 (hnRNP A1) (Helix-destabilizing protein) (Single-strand RNA-binding protein) (hnRNP core protein A1) [Cleaved into: Heterogeneous nuclear ribonucleoprotein A1, N-terminally processed]	HNRNPA1 HNRPA1	0.771349	0.806729	0.832222	-0.539777	+	2.0021	1.27444	1.11988	1.0556	0.344632		0.874779		1
P21291	Cysteine and glycine-rich protein 1 (Cysteine-rich protein 1) (CRP) (CRP1) (Epididymis luminal protein 141) (HEL-141)	CSRP1 CSRP CYRP	1.04901	0.89436	1.14143	0.0687482		0.107995	0.914955	1.13758	1.01194	0.0524438		0.091945		1
P46782	40S ribosomal protein S5 (Small ribosomal subunit protein uS7) [Cleaved into: 40S ribosomal protein S5, N-terminally processed]	RPS5	0.978021	1.05216	1.02046	0.0412823		0.28207	1.18862	1.27587	1.10768	0.430514		1.28864		1
P17980	26S proteasome regulatory subunit 6A (26S proteasome AAA-ATPase subunit RPT5) (Proteasome 26S subunit ATPase 3) (Proteasome subunit P50) (Tat-binding protein 1) (TBP-1)	PSMC3 TBP1	0.935318	1.05818	0.909806	-0.0808032		0.27552	0.913273	0.938223	0.901469	-0.211939	+	1.74033		1
P04844	Dolichyl-diphosphooligosaccharide--protein glycosyltransferase subunit 2 (Dolichyl-diphosphooligosaccharide--protein glycosyltransferase 63 kDa subunit) (RIBIIR) (Ribophorin II) (RPN-II) (Ribophorin-2)	RPN2	1.12949	0.966834	1.00125	0.0789374		0.227646	1.07868	1.03262	1.04354	0.124125		1.2051		1
P41091	Eukaryotic translation initiation factor 2 subunit 3 (EC 3.6.5.3) (Eukaryotic translation initiation factor 2 subunit gamma X) (eIF-2-gamma X) (eIF-2gX)	EIF2S3 EIF2G	0.90931	0.840554	0.973148	-0.23892		0.838561	0.83184	1.00275	0.991512	-0.147273		0.392296		1
Q8N1F7	Nuclear pore complex protein Nup93 (93 kDa nucleoporin) (Nucleoporin Nup93)	NUP93 KIAA0095	1.09656	0.871049	0.93232	-0.0836682		0.201717	0.986346	0.939946	0.907661	-0.140431		0.854849		1
Q9Y4L1	Hypoxia up-regulated protein 1 (150 kDa oxygen-regulated protein) (ORP-150) (170 kDa glucose-regulated protein) (GRP-170)	HYOU1 GRP170 ORP150	1.05639	1.04085	1.06598	0.130658	+	1.77398	0.953682	1.03025	0.825885	-0.161524		0.403541		1
Q96N66	Lysophospholipid acyltransferase 7 (LPLAT 7) (EC 2.3.1.-) (1-acylglycerophosphatidylinositol O-acyltransferase) (Bladder and breast carcinoma-overexpressed gene 1 protein) (Leukocyte receptor cluster member 4) (Lysophosphatidylinositol acyltransferase) (LPIAT) (Lyso-PI acyltransferase) (Membrane-bound O-acyltransferase domain-containing protein 7) (O-acyltransferase domain-containing protein 7) (…	MBOAT7 BB1 LENG4 OACT7	0.873075	0.974538	0.895406	-0.220865		0.949742	1.13454	1.28398	1.09224	0.387751		1.06181		1
P11766	Alcohol dehydrogenase class-3 (EC 1.1.1.1) (Alcohol dehydrogenase 5) (Alcohol dehydrogenase class chi chain) (Alcohol dehydrogenase class-III) (Glutathione-dependent formaldehyde dehydrogenase) (FALDH) (FDH) (GSH-FDH) (EC 1.1.1.-) (S-(hydroxymethyl)glutathione dehydrogenase) (EC 1.1.1.284)	ADH5 ADHX FDH	1.07888	0.947935	0.41179	-0.510981		0.356231	0.880894	0.933534	0.7108	-0.424897		0.786548		1
P36952	Serpin B5 (Maspin) (Peptidase inhibitor 5) (PI-5)	SERPINB5 PI5	1.0523	1.18231	1.255	0.372852		0.987571	1.01066	0.952268	1.04786	0.00885958		0.0321044		1
O95433	Activator of 90 kDa heat shock protein ATPase homolog 1 (AHA1) (p38)	AHSA1 C14orf3 HSPC322	0.970571	0.936985	0.994412	-0.0819384		0.717261	0.961171	1.01116	0.974846	-0.0438136		0.4488		1
Q9UDY2	Tight junction protein ZO-2 (Tight junction protein 2) (Zona occludens protein 2) (Zonula occludens protein 2)	TJP2 X104 ZO2	0.710428	0.837032	0.972747	-0.429806		0.739818	1.06406	1.10396	0.924877	0.0752124		0.180915		1
P54577	Tyrosine--tRNA ligase, cytoplasmic (EC 6.1.1.1) (Tyrosyl-tRNA synthetase) (TyrRS) [Cleaved into: Tyrosine--tRNA ligase, cytoplasmic, N-terminally processed]	YARS1 YARS	0.708146	0.842789	0.760518	-0.643054	+	1.45718	0.953101	0.92811	0.989246	-0.108866		0.860004		1
P17301	Integrin alpha-2 (CD49 antigen-like family member B) (Collagen receptor) (Platelet membrane glycoprotein Ia) (GPIa) (VLA-2 subunit alpha) (CD antigen CD49b)	ITGA2 CD49B	1.1214	1.11154	1.07691	0.242413	+	1.81467	1.0626	1.03701	1.10627	0.163701		1.13822		1
P20618	Proteasome subunit beta type-1 (Macropain subunit C5) (Multicatalytic endopeptidase complex subunit C5) (Proteasome component C5) (Proteasome gamma chain)	PSMB1 PSC5	0.865321	0.792382	1.06135	-0.242508		0.461433	0.975372	1.02376	1.0256	0.0202538		0.169517		1
Q9Y2Q3	Glutathione S-transferase kappa 1 (EC 2.5.1.18) (GST 13-13) (GST class-kappa) (GSTK1-1) (hGSTK1) (Glutathione S-transferase subunit 13)	GSTK1 HDCMD47P	1.04464	0.996169	1.06234	0.0833776		0.648481	1.12703	1.03046	1.14489	0.236846		0.993788		1
P60900	Proteasome subunit alpha type-6 (27 kDa prosomal protein) (PROS-27) (p27K) (Macropain iota chain) (Multicatalytic endopeptidase complex iota chain) (Proteasome iota chain)	PSMA6 PROS27	1.06679	1.07351	1.01845	0.12718		1.04221	1.03042	1.05401	1.04264	0.102316	+	1.61998		1
Q02878	60S ribosomal protein L6 (Large ribosomal subunit protein eL6) (Neoplasm-related protein C140) (Tax-responsive enhancer element-binding protein 107) (TaxREB107)	RPL6 TXREB1	0.756416	0.898395	0.935122	-0.362498		0.836174	1.02825	1.10634	1.13821	0.214644		0.980934		1
Q15366	Poly(rC)-binding protein 2 (Alpha-CP2) (Heterogeneous nuclear ribonucleoprotein E2) (hnRNP E2)	PCBP2	0.835287	0.884373	0.892828	-0.341113	+	1.66253	0.915233	1.1013	0.954807	-0.0236734		0.0753659		1
P38159	RNA-binding motif protein, X chromosome (Glycoprotein p43) (Heterogeneous nuclear ribonucleoprotein G) (hnRNP G) [Cleaved into: RNA-binding motif protein, X chromosome, N-terminally processed]	RBMX HNRPG RBMXP1	0.876486	0.840645	0.910888	-0.326494	+	1.53649	0.982925	0.961304	1.19864	0.114745		0.211813		1
P60660	Myosin light polypeptide 6 (17 kDa myosin light chain) (LC17) (Myosin light chain 3) (MLC-3) (Myosin light chain alkali 3) (Myosin light chain A3) (Smooth muscle and nonmuscle myosin light chain alkali 6)	MYL6	0.824176	0.88143	0.824623	-0.420018	+	1.77941	0.967755	1.13969	1.08242	0.151343		0.461273		1
P23381	Tryptophan--tRNA ligase, cytoplasmic (EC 6.1.1.2) (Interferon-induced protein 53) (IFP53) (Tryptophanyl-tRNA synthetase) (TrpRS) (hWRS) [Cleaved into: T1-TrpRS; T2-TrpRS]	WARS1 IFI53 WARS WRS	0.338494		0.313743	-2.76348	+	1.66658	0.845748		0.826348	-0.44164	+	1.38535		1
O14818	Proteasome subunit alpha type-7 (Proteasome subunit RC6-1) (Proteasome subunit XAPC7)	PSMA7 HSPC	0.66473	1.01028	1.02676	-0.258235		0.322664	0.839074	0.999895	1.041	-0.100705		0.24736		1
P50914	60S ribosomal protein L14 (CAG-ISL 7) (Large ribosomal subunit protein eL14)	RPL14	0.983479	0.919985	0.96769	-0.108266		0.800359	1.06279	1.1611	1.1891	0.318094		1.18986		1
Q8TCS8	Polyribonucleotide nucleotidyltransferase 1, mitochondrial (EC 2.7.7.8) (3'-5' RNA exonuclease OLD35) (PNPase old-35) (Polynucleotide phosphorylase 1) (PNPase 1) (Polynucleotide phosphorylase-like protein)	PNPT1 PNPASE	1.01806	0.882748	0.946639	-0.128714		0.493778	0.895999	0.996015	0.921374	-0.158393		0.755591		1
Q5JTH9	RRP12-like protein	RRP12 KIAA0690	1.11107	1.06023	1.04118	0.16877		1.14133	0.975002	0.849983	0.932596	-0.207807		0.775832		1
P25786	Proteasome subunit alpha type-1 (30 kDa prosomal protein) (PROS-30) (Macropain subunit C2) (Multicatalytic endopeptidase complex subunit C2) (Proteasome component C2) (Proteasome nu chain)	PSMA1 HC2 NU PROS30 PSC2	0.999512	1.02864	1.08846	0.0940528		0.563929	1.11994	1.07623	1.05586	0.198948	+	1.36033		1
Q00341	Vigilin (High density lipoprotein-binding protein) (HDL-binding protein)	HDLBP HBP VGL	1.05615	1.09135	1.11366	0.205863	+	1.48458	0.90784	1.13383	0.914608	-0.0362072		0.092331		1
Q06323	Proteasome activator complex subunit 1 (11S regulator complex subunit alpha) (REG-alpha) (Activator of multicatalytic protease subunit 1) (Interferon gamma up-regulated I-5111 protein) (IGUP I-5111) (Proteasome activator 28 subunit alpha) (PA28a) (PA28alpha)	PSME1 IFI5111	0.791505	0.867434	0.840444	-0.450269	+	1.68165	0.988909	1.02219	0.975901	-0.0107072		0.111521		1
Q99623	Prohibitin-2 (B-cell receptor-associated protein BAP37) (D-prohibitin) (Repressor of estrogen receptor activity)	PHB2 BAP REA	1.05721	0.934054	0.980745	-0.0231234		0.0997237	0.931836	0.982071	0.947383	-0.116754		1.03744		1
P04792	Heat shock protein beta-1 (HspB1) (28 kDa heat shock protein) (Estrogen-regulated 24 kDa protein) (Heat shock 27 kDa protein) (HSP 27) (Stress-responsive protein 27) (SRP27)	HSPB1 HSP27 HSP28	1.01151	0.972334	0.967602	-0.040242		0.442694	0.810899	0.9652	0.936415	-0.248447		0.712816		1
Q9Y2W1	Thyroid hormone receptor-associated protein 3 (BCLAF1 and THRAP3 family member 2) (Thyroid hormone receptor-associated protein complex 150 kDa component) (Trap150)	THRAP3 BCLAF2 TRAP150	0.96283	0.866465	0.874985	-0.255945		1.04939	0.962791	1.1075	0.974644	0.0366628		0.0961665		1
O15143	Actin-related protein 2/3 complex subunit 1B (Arp2/3 complex 41 kDa subunit) (p41-ARC)	ARPC1B ARC41	1.01372	1.10144	1.15271	0.210929		0.810235	1.02627	1.0052	1.06685	0.0795339		0.680732		1
P25789	Proteasome subunit alpha type-4 (Macropain subunit C9) (Multicatalytic endopeptidase complex subunit C9) (Proteasome component C9) (Proteasome subunit L)	PSMA4 HC9 PSC9	0.988346	1.07343	1.07826	0.112511		0.594992	1.14606	1.08279	0.935782	0.131759		0.304594		1
Q9UHD8	Septin-9 (MLL septin-like fusion protein MSF-A) (MLL septin-like fusion protein) (Ovarian/Breast septin) (Ov/Br septin) (Septin D1)	SEPTIN9 KIAA0991 MSF SEPT9	1.00752	1.04865	1.11704	0.138432		0.683245	0.85051	1.16742	1.09604	0.0919624		0.0978619		1
P34896	Serine hydroxymethyltransferase, cytosolic (SHMT) (EC 2.1.2.1) (Glycine hydroxymethyltransferase) (Serine methylase)	SHMT1	0.850789	0.900095	0.798928	-0.401003	+	1.38218	0.909161	1.04819	0.857664	-0.15697		0.424529		1
Q9NUQ9	CYFIP-related Rac1 interactor B (L1)	CYRIB CYRI FAM49B BM-009	1.15586	1.10371	1.05593	0.246618		1.20293	0.93278	1.0582	0.964807	-0.0366167		0.149969		1
P54136	Arginine--tRNA ligase, cytoplasmic (EC 6.1.1.19) (Arginyl-tRNA synthetase) (ArgRS)	RARS1 RARS	1.02073	0.876484	1.01363	-0.0744029		0.237273	0.951097	0.968539	0.90343	-0.149923		1.00453		1
P49720	Proteasome subunit beta type-3 (Proteasome chain 13) (Proteasome component C10-II) (Proteasome theta chain)	PSMB3	0.923817	0.944712	1.12128	-0.00839548		0.0376836	0.919796	0.918868	0.933269	-0.195004	+	2.3968		1
P23284	Peptidyl-prolyl cis-trans isomerase B (PPIase B) (EC 5.2.1.8) (CYP-S1) (Cyclophilin B) (Rotamase B) (S-cyclophilin) (SCYLP)	PPIB CYPB	1.04624	1.06685	0.918314	0.0256806		0.0568733	1.70947	1.28376	1.12226	0.779716		0.864795		1
P23526	Adenosylhomocysteinase (AdoHcyase) (EC 3.13.2.1) (S-adenosyl-L-homocysteine hydrolase)	AHCY SAHH	1.1257	1.05137	1.10996	0.225349	+	1.31294	0.940071	1.14834	0.935659	0.0197065		0.0154428		1
O00159	Unconventional myosin-Ic (Myosin I beta) (MMI-beta) (MMIb)	MYO1C	0.953859	0.997065	0.942831	-0.0889282		0.778566	0.935031	1.00686	1.04061	-0.0144255		0.0711999		1
P00387	NADH-cytochrome b5 reductase 3 (B5R) (Cytochrome b5 reductase) (EC 1.6.2.2) (Diaphorase-1)	CYB5R3 DIA1	1.04871	1.06142	1.08614	0.156294	+	1.59464	0.849887	1.09612	0.997782	-0.0466532		0.111242		1
O75131	Copine-3 (Copine III)	CPNE3 CPN3 KIAA0636	0.951048	0.996055	1.12517	0.0587114		0.14704	0.931682	0.963092	1.29281	0.149581		0.166581		1
Q8WUM4	Programmed cell death 6-interacting protein (PDCD6-interacting protein) (ALG-2-interacting protein 1) (ALG-2-interacting protein X) (Hp95)	PDCD6IP AIP1 ALIX KIAA1375	0.949441	0.975062	1.06056	-0.0123106		0.0597458	1.1247	0.947915	0.855285	-0.0600009		0.132433		1
O15020	Spectrin beta chain, non-erythrocytic 2 (Beta-III spectrin) (Spinocerebellar ataxia 5 protein)	SPTBN2 KIAA0302 SCA5	1.08849	0.577105		-0.451246		0.223716	1.01998	1.06689		0.104861		0.506915		1
Q13347	Eukaryotic translation initiation factor 3 subunit I (eIF3i) (Eukaryotic translation initiation factor 3 subunit 2) (TGF-beta receptor-interacting protein 1) (TRIP-1) (eIF-3-beta) (eIF3 p36)	EIF3I EIF3S2 TRIP1	1.05091	1.0064	0.968772	0.021353		0.117383	0.952488	0.939204	0.924337	-0.156078	+	1.73994		1
P52788	Spermine synthase (SPMSY) (EC 2.5.1.22) (Spermidine aminopropyltransferase)	SMS	0.945781	1.25424	1.15044	0.272496		0.468051	0.970676	0.940976	0.845601	-0.208101		0.755852		1
P16144	Integrin beta-4 (GP150) (CD antigen CD104)	ITGB4	1.08175	1.11989	1.1396	0.265695	+	1.70576	0.952036	0.948633	0.887428	-0.180664		1.07553		1
O95881	Thioredoxin domain-containing protein 12 (EC 1.8.4.2) (Endoplasmic reticulum resident protein 18) (ER protein 18) (ERp18) (Endoplasmic reticulum resident protein 19) (ER protein 19) (ERp19) (Thioredoxin-like protein p19) (hTLP19)	TXNDC12 TLP19 UNQ713/PRO1376	0.903077	1.07778	0.937583	-0.0679784		0.202081	1.18882	0.937563	1.10957	0.186725		0.375722		1
P25685	DnaJ homolog subfamily B member 1 (DnaJ protein homolog 1) (Heat shock 40 kDa protein 1) (HSP40) (Heat shock protein 40) (Human DnaJ protein 1) (hDj-1)	DNAJB1 DNAJ1 HDJ1 HSPF1	1.20456	1.20895	1.26857	0.505264	+	2.18142	0.957788	1.15583	1.1169	0.182583		0.461543		1
Q99460	26S proteasome non-ATPase regulatory subunit 1 (26S proteasome regulatory subunit RPN2) (26S proteasome regulatory subunit S1) (26S proteasome subunit p112)	PSMD1	1.12719	1.18981	1.20371	0.394736	+	1.80435	0.832233	0.986702	0.865268	-0.274324		0.802711		1
Q9BYN0	Sulfiredoxin-1 (EC 1.8.98.2)	SRXN1 C20orf139 SRX SRX1	1.01382	1.15195	1.12996	0.231871		0.836866	0.925718	1.04592	1.04581	0.0143052		0.0325818		1
O96008	Mitochondrial import receptor subunit TOM40 homolog (Protein Haymaker) (Translocase of outer membrane 40 kDa subunit homolog) (p38.5)	TOMM40 C19orf1 PEREC1 TOM40	1.01611	0.830486	0.496417	-0.609606		0.513087	0.950221	0.960815	0.723782	-0.320122		0.561433		1
O95793	Double-stranded RNA-binding protein Staufen homolog 1	STAU1 STAU	1.41448	1.37676	1.19358	0.700133	+	1.47681	0.879811	1.09136	1.02012	-0.00716598		0.0345381		1
Q13740	CD166 antigen (Activated leukocyte cell adhesion molecule) (CD antigen CD166)	ALCAM MEMD	0.7011	0.73963	0.651734	-0.888535	+	1.9946	1.00696	1.06507	1.10941	0.144825		0.756435		1
P35998	26S proteasome regulatory subunit 7 (26S proteasome AAA-ATPase subunit RPT1) (Proteasome 26S subunit ATPase 2)	PSMC2 MSS1	0.498124	0.799278	0.826652	-0.85158		0.818951	0.955461	0.984839	0.852774	-0.176266		0.626881		1
Q9UBB4	Ataxin-10 (Brain protein E46 homolog) (Spinocerebellar ataxia type 10 protein)	ATXN10 SCA10	0.959561	0.874151	0.980138	-0.157988		0.689547	0.899824	0.932905	0.857892	-0.268433	+	1.33862		1
O60884	DnaJ homolog subfamily A member 2 (Cell cycle progression restoration gene 3 protein) (Dnj3) (Dj3) (HIRA-interacting protein 4) (Renal carcinoma antigen NY-REN-14)	DNAJA2 CPR3 HIRIP4	1.0678	1.2491	1.07624	0.303708		0.847667	0.833839	0.96466	0.963725	-0.203658		0.65428		1
P51571	Translocon-associated protein subunit delta (TRAP-delta) (Signal sequence receptor subunit delta) (SSR-delta)	SSR4 TRAPD	0.812441	1.0559	0.97809	-0.129594		0.275176	1.28505	1.15455	1.30898	0.549407	+	1.52444		1
P67870	Casein kinase II subunit beta (CK II beta) (Phosvitin) (Protein G5a)	CSNK2B CK2N G5A	0.829995	1.03458	1.04714	-0.0736638		0.164155	1.12985	1.06718	1.0814	0.218886	+	1.44406		1
Q9NTK5	Obg-like ATPase 1 (DNA damage-regulated overexpressed in cancer 45) (DOC45) (GTP-binding protein 9)	OLA1 GTPBP9 PRO2455 PTD004	1.16135	1.14653	0.989042	0.232765		0.663802	1.01387	0.893373	1.00184	-0.0758947		0.295541		1
O60610	Protein diaphanous homolog 1 (Diaphanous-related formin-1) (DRF1)	DIAPH1 DIAP1	1.05928	0.997102	1.15117	0.164986		0.588049	1.00117	0.952338	0.924912	-0.102032		0.674217		1
P38606	V-type proton ATPase catalytic subunit A (V-ATPase subunit A) (EC 7.1.2.2) (V-ATPase 69 kDa subunit) (Vacuolar ATPase isoform VA68) (Vacuolar proton pump subunit alpha)	ATP6V1A ATP6A1 ATP6V1A1 VPP2	0.906963	0.960702	0.935238	-0.167601		1.26297	0.873907	1.03296	0.865464	-0.194654		0.540223		1
Q9NQR4	Omega-amidase NIT2 (EC 3.5.1.3) (Nitrilase homolog 2)	NIT2 CUA002	1.2462	1.11893	1.19228	0.420309	+	1.48947	1.04674	1.01198	1.00267	0.0499534		0.577944		1
P47756	F-actin-capping protein subunit beta (CapZ beta)	CAPZB	0.995816	1.00226	0.830032	-0.145526		0.380038	0.985191	0.964623	1.05373	0.00290999		0.00539951		1
P25205	DNA replication licensing factor MCM3 (EC 3.6.4.12) (DNA polymerase alpha holoenzyme-associated protein P1) (P1-MCM3) (RLF subunit beta) (p102)	MCM3	1.20494	0.971171	1.00895	0.147632		0.307658	0.943739	0.881921	0.916993	-0.221194	+	1.35295		1
P26373	60S ribosomal protein L13 (Breast basic conserved protein 1) (Large ribosomal subunit protein eL13)	RPL13 BBC1 OK/SW-cl.46	1.02428	0.980278	0.980698	-0.0121499		0.120376	1.0525	0.963757	1.0723	0.0717486		0.314938		1
P45974	Ubiquitin carboxyl-terminal hydrolase 5 (EC 3.4.19.12) (Deubiquitinating enzyme 5) (Isopeptidase T) (Ubiquitin thioesterase 5) (Ubiquitin-specific-processing protease 5)	USP5 ISOT	1.08362	0.717564	0.669229	-0.479025		0.545759	1.07354	0.943883	1.02154	0.0318224		0.103545		1
P11216	Glycogen phosphorylase, brain form (EC 2.4.1.1)	PYGB	1.14376	1.11122	1.21757	0.360758	+	1.48576	0.979205	0.991381	0.885551	-0.1212		0.531729		1
P17931	Galectin-3 (Gal-3) (35 kDa lectin) (Carbohydrate-binding protein 35) (CBP 35) (Galactose-specific lectin 3) (Galactoside-binding protein) (GALBP) (IgE-binding protein) (L-31) (Laminin-binding protein) (Lectin L-29) (Mac-2 antigen)	LGALS3 MAC2	0.659648	0.71419	0.815362	-0.777073	+	1.44889	0.947733	0.92272	0.890694	-0.204621	+	1.36094		1
P62249	40S ribosomal protein S16 (Small ribosomal subunit protein uS9)	RPS16	1.02892	0.968008	1.04908	0.0375337		0.216639	1.23065	1.12512	1.06772	0.32567		1.05514		1
Q00325	Phosphate carrier protein, mitochondrial (Phosphate transport protein) (PTP) (Solute carrier family 25 member 3)	SLC25A3 PHC OK/SW-cl.48	0.537488	0.68985	0.673404	-1.12554	+	1.54853	1.25852	1.07851	1.09877	0.334524		0.952863		1
P61160	Actin-related protein 2 (Actin-like protein 2)	ACTR2 ARP2	0.881519	1.22812	1.08217	0.152851		0.194059	1.26493	0.897967	1.05986	0.176645		0.224968		1
P62937	Peptidyl-prolyl cis-trans isomerase A (PPIase A) (EC 5.2.1.8) (Cyclophilin A) (Cyclosporin A-binding protein) (Rotamase A) [Cleaved into: Peptidyl-prolyl cis-trans isomerase A, N-terminally processed]	PPIA CYPA	1.0427	1.03049	1.06533	0.111329	+	1.35989	1.1901	1.22114	1.16751	0.435055	+	2.2671		1
P05387	60S acidic ribosomal protein P2 (Large ribosomal subunit protein P2) (Renal carcinoma antigen NY-REN-44)	RPLP2 D11S2243E RPP2	0.605087	0.825757	0.598134	-0.964522		1.20446	0.894474	1.28537	1.02269	0.161129		0.179986		1
O95336	6-phosphogluconolactonase (6PGL) (EC 3.1.1.31)	PGLS	1.06688	0.997975	1.11968	0.147222		0.655317	0.873297	0.947058	0.852544	-0.284732		1.17299		1
Q92734	Protein TFG (TRK-fused gene protein)	TFG	1.19934	1.05182	1.17781	0.329622		1.07218	0.957862	1.08128	1.02702	0.0538029		0.209644		1
P63241	Eukaryotic translation initiation factor 5A-1 (eIF-5A-1) (eIF-5A1) (Eukaryotic initiation factor 5A isoform 1) (eIF-5A) (Rev-binding factor) (eIF-4D)	EIF5A	0.813859	0.963411	0.776395	-0.39728		0.894511	1.12834	1.05263	0.81502	-0.00330563		0.0349136		1
P62888	60S ribosomal protein L30 (Large ribosomal subunit protein eL30)	RPL30	0.922506	1.00669	1.07616	0.00439628		0.00137471	0.970488	1.07727	0.791524	-0.135795		0.253522		1
O43399	Tumor protein D54 (hD54) (Tumor protein D52-like 2)	TPD52L2	1.24335	1.20276	1.13253	0.434977	+	1.63158	1.00371	1.10996	0.976924	0.073371		0.265236		1
O96019	Actin-like protein 6A (53 kDa BRG1-associated factor A) (Actin-related protein Baf53a) (ArpNbeta) (BRG1-associated factor 53A) (BAF53A) (INO80 complex subunit K)	ACTL6A BAF53 BAF53A INO80K	0.976074	0.992077	1.14466	0.0910391		0.24584	0.856793	1.00308	0.952959	-0.158884		0.540512		1
P20073	Annexin A7 (Annexin VII) (Annexin-7) (Synexin)	ANXA7 ANX7 SNX OK/SW-cl.95	0.880369	0.84222	0.931412	-0.30223		1.28854	0.953089	1.01425	0.893234	-0.117369		0.503318		1
P26006	Integrin alpha-3 (CD49 antigen-like family member C) (FRP-2) (Galactoprotein B3) (GAPB3) (VLA-3 subunit alpha) (CD antigen CD49c) [Cleaved into: Integrin alpha-3 heavy chain; Integrin alpha-3 light chain]	ITGA3 MSK18	0.962098	1.0572	1.45282	0.36046		0.39139	0.966642	0.809062	0.805375	-0.370944		0.905335		1
Q9UKY7	Protein CDV3 homolog	CDV3 H41	1.49401	1.02494		0.568962		0.336318	1.01884	1.06803		0.104859		0.489348		1
P09525	Annexin A4 (35-beta calcimedin) (Annexin IV) (Annexin-4) (Carbohydrate-binding protein p33/p41) (Chromobindin-4) (Endonexin I) (Lipocortin IV) (P32.5) (PP4-X) (Placental anticoagulant protein II) (PAP-II) (Protein II)	ANXA4 ANX4	1.00433	0.899088	1.0238	-0.0605682		0.233463	1.00921	0.963051	0.932897	-0.0792259		0.538977		1
P28838	Cytosol aminopeptidase (EC 3.4.11.1) (Cysteinylglycine-S-conjugate dipeptidase) (EC 3.4.13.23) (Leucine aminopeptidase 3) (LAP-3) (Leucyl aminopeptidase) (Peptidase S) (Proline aminopeptidase) (EC 3.4.11.5) (Prolyl aminopeptidase)	LAP3 LAPEP PEPS	1.02761	1.1007	1.09867	0.179877		1.06987	1.002	0.909691	0.98385	-0.0874075		0.461835		1
Q96FW1	Ubiquitin thioesterase OTUB1 (EC 3.4.19.12) (Deubiquitinating enzyme OTUB1) (OTU domain-containing ubiquitin aldehyde-binding protein 1) (Otubain-1) (hOTU1) (Ubiquitin-specific-processing protease OTUB1)	OTUB1 OTB1 OTU1 HSPC263	1.23134	0.98539	1.13083	0.270355		0.609428	0.929091	1.11614	0.951847	-0.00240108		0.023772		1
O75340	Programmed cell death protein 6 (Apoptosis-linked gene 2 protein homolog) (ALG-2)	PDCD6 ALG2	0.774509	0.811732	1.01144	-0.35513		0.681875	1.09455	1.05972	1.18164	0.261762		1.0817		1
Q96CS3	FAS-associated factor 2 (Protein ETEA) (UBX domain-containing protein 3B) (UBX domain-containing protein 8)	FAF2 ETEA KIAA0887 UBXD8 UBXN3B	0.946336		0.839058	-0.279945		0.514117	1.04903		1.07982	0.153989		0.838161		1
P50502	Hsc70-interacting protein (Hip) (Aging-associated protein 2) (Progesterone receptor-associated p48 protein) (Protein FAM10A1) (Putative tumor suppressor ST13) (Renal carcinoma antigen NY-REN-33) (Suppression of tumorigenicity 13 protein)	ST13 AAG2 FAM10A1 HIP SNC6	1.19368			0.436642			0.979685			-0.0506198				1
O76094	Signal recognition particle subunit SRP72 (SRP72) (Signal recognition particle 72 kDa protein)	SRP72	0.991383	0.923887	1.1156	0.0252446		0.041929	0.869706	0.96882	0.792876	-0.323321		0.835763		1
Q9NZI8	Insulin-like growth factor 2 mRNA-binding protein 1 (IGF2 mRNA-binding protein 1) (IMP-1) (IMP1) (Coding region determinant-binding protein) (CRD-BP) (IGF-II mRNA-binding protein 1) (VICKZ family member 1) (Zipcode-binding protein 1) (ZBP-1)	IGF2BP1 CRDBP VICKZ1 ZBP1	0.893203	0.976877	0.873395	-0.220455		0.928371	1.03343	0.960091	0.828057	-0.151223		0.376197		1
P83731	60S ribosomal protein L24 (60S ribosomal protein L30) (Large ribosomal subunit protein eL24)	RPL24	1.11068	0.971981	1.12541	0.165384		0.522922	0.934203	1.10109	1.08992	0.100853		0.261326		1
P16422	Epithelial cell adhesion molecule (Ep-CAM) (Adenocarcinoma-associated antigen) (Cell surface glycoprotein Trop-1) (Epithelial cell surface antigen) (Epithelial glycoprotein) (EGP) (Epithelial glycoprotein 314) (EGP314) (hEGP314) (KS 1/4 antigen) (KSA) (Major gastrointestinal tumor-associated protein GA733-2) (Tumor-associated calcium signal transducer 1) (CD antigen CD326)	EPCAM GA733-2 M1S2 M4S1 MIC18 TACSTD1 TROP1	1.18979	0.756575	0.79463	-0.222687		0.28594	0.828827	1.07516	1.21204	0.0935828		0.0755985		1
Q14160	Protein scribble homolog (Scribble) (hScrib) (Protein LAP4)	SCRIB CRIB1 KIAA0147 LAP4 SCRB1 VARTUL	1.06254			0.149611			0.943477			-0.143497				1
O00115	Deoxyribonuclease-2-alpha (EC 3.1.22.1) (Acid DNase) (Deoxyribonuclease II alpha) (DNase II alpha) (Lysosomal DNase II) (R31240_2)	DNASE2 DNASE2A DNL2	1.07369	1.11631		0.223823		0.87041	1.04773	0.931242		-0.0260721		0.0610132		1
P57088	Transmembrane protein 33 (Protein DB83) (SHINC-3)	TMEM33 DB83	1.01544		0.872005	-0.142853		0.243414	0.940276		1.08562	0.0317264		0.0411898		1
P04637	Cellular tumor antigen p53 (Antigen NY-CO-13) (Phosphoprotein p53) (Tumor suppressor p53)	TP53 P53	0.878371	1.04752	1.04033	-0.027926		0.0841478	1.41028	1.03641	0.88663	0.259845		0.228364		1
Q9UMX0	Ubiquilin-1 (Protein linking IAP with cytoskeleton 1) (PLIC-1) (hPLIC-1)	UBQLN1 DA41 PLIC1	1.26978	1.128	1.25184	0.48343	+	1.45773	0.845511	0.956109	0.951794	-0.211537		0.790212		1
Q9H910	Jupiter microtubule associated homolog 2 (Hematological and neurological expressed 1-like protein) (HN1-like protein)	JPT2 C16orf34 HN1L L11	1.07862	1.18762	1.13714	0.311141	+	1.33807	0.932799	1.03922	1.04236	0.0117856		0.0300542		1
P62266	40S ribosomal protein S23 (Small ribosomal subunit protein uS12)	RPS23	0.906167		1.04038	-0.0668157		0.1289	0.830533		0.801875	-0.500883		1.26075		1
P78406	mRNA export factor RAE1 (Rae1 protein homolog) (mRNA-associated protein mrnp 41)	RAE1 MRNP41	0.958453	0.945242	0.986723	-0.0917742		1.00845	1.04147	1.02283	1.07798	0.114283		1.01842		1
[truncated: 1,249 more rows]
